# Supplementary material for: A Simple Method for In-Depth Proteome Analysis of Mammalian Cell Culture Conditioned Media Containing Fetal Bovine Serum
Source: MDPI journal article supplement (doi:10.3390/ijms22052565), 2021-03-04
Supplement: s1 [file s1]

## Supplementary Figures

**A**

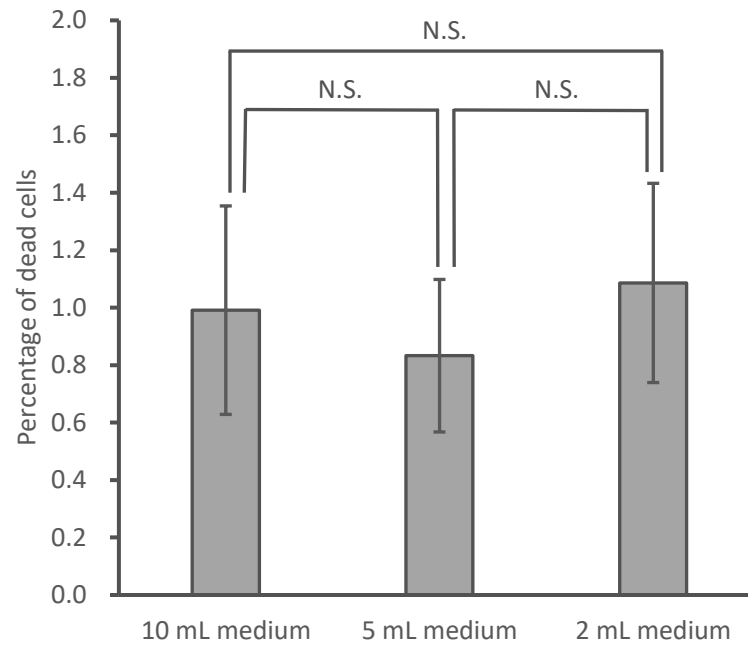

**B**

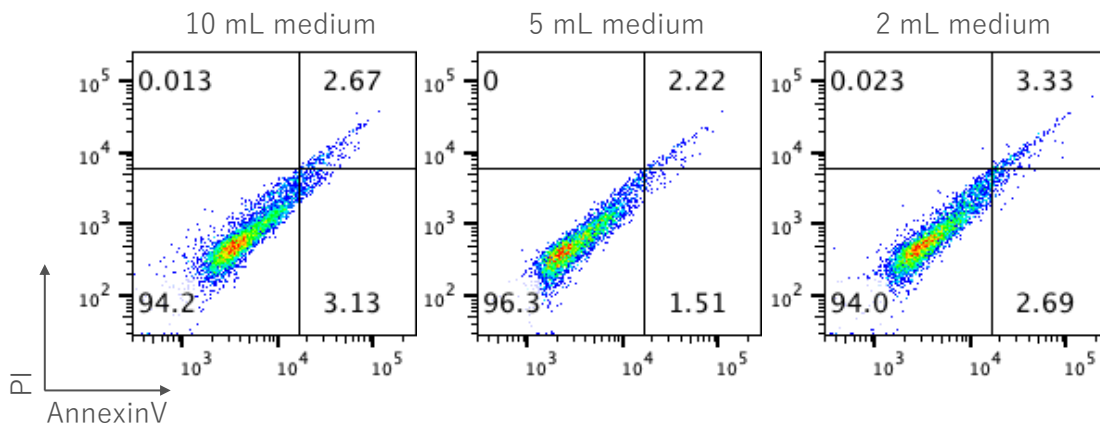

**Supplementary Figure 1**

**Supplementary Figure 1** – Dead and apoptotic rate of HeLa cells cultured in 10, 5, or 2 mL of medium containing 10% FBS for 24 h. (A) The number of dead cells was counted using trypan blue. (B) FACS analysis for FITC-Annexin V-based apoptosis detection. The top right (Annexin V+ / PI+) indicates apoptotic cells. Abbreviations: N.S., not significant; PI, propidium iodide

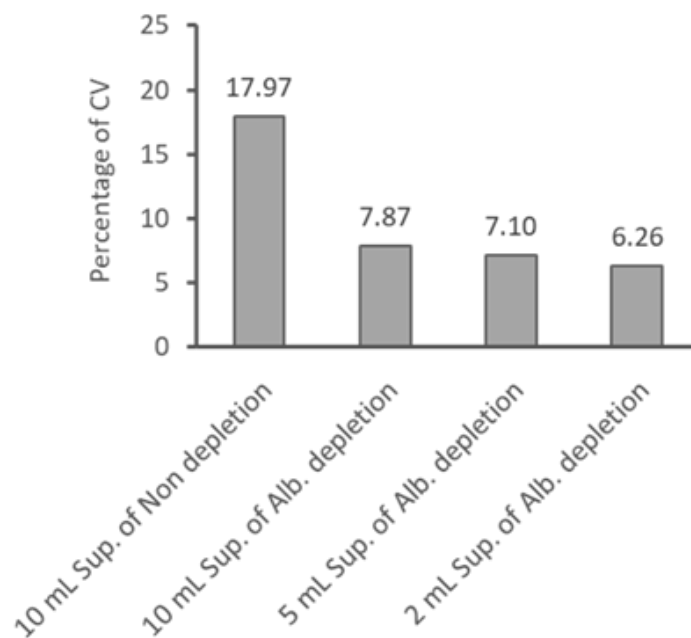

**Supplementary Figure 2**

**Supplementary Figure 2** – Reproducibility of proteome analyses by different treatments. The medians of the protein intensities' CVs were calculated from the four treatments (n=3 each). The supernatants cultured in 10 mL of the medium were used for non-depletion. The supernatants cultured in 10, 5, and 2 mL of the medium were used for albumin depletion. Abbreviations: ALB, serum albumin; Sup, supernatant

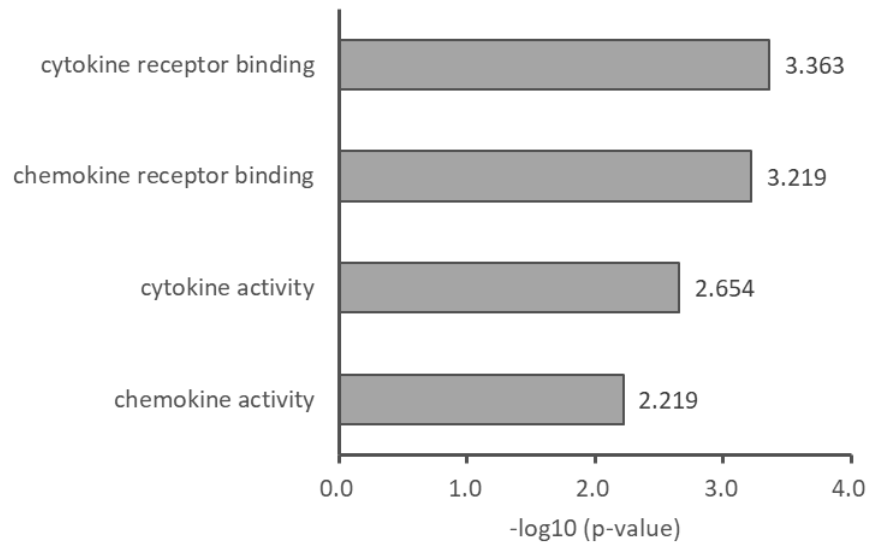

### Supplementary Figure 3

**Supplementary Figure 3** – Molecular function GO enrichment analysis of the significantly regulated proteins by TNF stimulation. The proteins were found to contain proteins with roles related to cytokines and chemokines.
