# Supplementary material for: A Simple Method for In-Depth Proteome Analysis of Mammalian Cell Culture Conditioned Media Containing Fetal Bovine Serum
Source: Int J Mol Sci. 2021 Mar 4;22(5):2565. doi: 10.3390/ijms22052565 (PMC7961985; doi:10.3390/ijms22052565)
Supplement: Supplementary file 1 [file ijms-22-02565-s001.zip › Supplementary Table S1.xlsx]

## Sheet: Supplementary table 1
Supplementary Table 1. List of human proteins identified befofe and after (Alb) depletion from the supernatant cultured in 10-mL medium containing 10% FBS. The results of simultaneously analyzing collected MS data for each treatment by the Scaffold DIA were used. Terms of "Secreted proteins," "Signal peptide," and "Extracellular exosome" were referred to the Human Protein Atlas, UniProt Seq Featu…
No	Uniprot Ac.	Protein name	Gene symbol	Molecular Weight	Secreted proteins	Signal peptide	Extracellular exosome	Non-depletion # of Peptides	Alb. depletion # of Peptides	Non treatment Intensity	Alb. removal Intensity	Observed only in Non-depletion	Common	Observed only in Alb. depletion
1	Q9Y490	Talin-1	TLN1	270 kDa			✓	51	62	5138851	9271411		✓
2	P98160	Basement membrane-specific heparan sulfate proteoglycan core protein	HSPG2	469 kDa	✓	✓	✓	47	85	9.74181e+06	2.82041e+08		✓
3	Q07954	Prolow-density lipoprotein receptor-related protein 1	LRP1	505 kDa		✓		46	69	3503388	7.29769e+07		✓
4	P21333	Filamin-A	FLNA	281 kDa			✓	45	66	2.1067e+06	7.45888e+07		✓
5	P01024	Complement C3	C3	187 kDa	✓	✓	✓	42	55	347166400	8.27849e+08		✓
6	Q99715	Collagen alpha-1(XII) chain	COL12A1	333 kDa	✓	✓	✓	41	67	7.45236e+06	1.2659e+08		✓
7	P18206	Vinculin	VCL	124 kDa			✓	34	34	154497	381219		✓
8	P07996	Thrombospondin-1	THBS1	129 kDa	✓	✓	✓	32	41	6.42852e+06	1.28036e+08		✓
9	O15230	Laminin subunit alpha-5	LAMA5	400 kDa	✓	✓	✓	28	57	7.45166e+06	1.50613e+08		✓
10	P02751	Fibronectin	FN1	272 kDa	✓	✓	✓	27	31	2.52252e+06	1.43992e+06		✓
11	O00468	Agrin	AGRN	217 kDa		✓	✓	24	36	1.06135e+07	2.22785e+08		✓
12	P04264	Keratin, type II cytoskeletal 1	KRT1	66 kDa			✓	24	19	7.61958e+08	2.15366e+08		✓
13	P01023	Alpha-2-macroglobulin	A2M	163 kDa	✓	✓	✓	23	38	16483550	9.11195e+07		✓
14	P78509	Reelin	RELN	388 kDa	✓	✓		22	38	263635	1.15936e+07		✓
15	P13639	Elongation factor 2	EEF2	95 kDa			✓	22	31	142846	1.72586e+06		✓
16	P35555	Fibrillin-1	FBN1	312 kDa	✓	✓		21	31	201429	874729		✓
17	P07900	Heat shock protein HSP 90-alpha	HSP90AA1	85 kDa			✓	21	28	4.9627e+07	4.94699e+08		✓
18	Q86VP6	Cullin-associated NEDD8-dissociated protein 1	CAND1	136 kDa			✓	21	23	8.10435e+06	8.21487e+07		✓
19	P04259	Keratin, type II cytoskeletal 6B	KRT6B	60 kDa			✓	21	12	2.1881e+06	913387		✓
20	Q02818	Nucleobindin-1	NUCB1	54 kDa	✓	✓	✓	20	20	6.17232e+06	29886080		✓
21	P13647	Keratin, type II cytoskeletal 5	KRT5	62 kDa			✓	20	16	21440120	4.63751e+06		✓
22	P02538	Keratin, type II cytoskeletal 6A	KRT6A	60 kDa			✓	20		1.63214e+06		✓
23	P07942	Laminin subunit beta-1	LAMB1	198 kDa	✓	✓	✓	19	32	2.81097e+06	4.91857e+07		✓
24	P35908	Keratin, type II cytoskeletal 2 epidermal	KRT2	65 kDa			✓	19	19	1.0621e+08	27058368		✓
25	P54289	Voltage-dependent calcium channel subunit alpha-2/delta-1	CACNA2D1	125 kDa		✓	✓	18	14	2.68982e+06	3.11633e+06		✓
26	P02768	Serum albumin	ALB	69 kDa	✓	✓	✓	18	11	382394200	208124600		✓
27	Q6V0I7	Protocadherin Fat 4	FAT4	543 kDa		✓	✓	17	30	843449	8.06658e+06		✓
28	O00391	Sulfhydryl oxidase 1	QSOX1	83 kDa		✓	✓	17	22	1.19892e+07	111679900		✓
29	P11021	Endoplasmic reticulum chaperone BiP	HSPA5	72 kDa		✓	✓	17	21	198076	6494888		✓
30	P50395	Rab GDP dissociation inhibitor beta	GDI2	51 kDa			✓	17	21	362785	7922074		✓
31	P13645	Keratin, type I cytoskeletal 10	KRT10	59 kDa			✓	17	11	2.21472e+08	3.61059e+07		✓
32	P15924	Desmoplakin	DSP	332 kDa			✓	17		3.11758e+06		✓
33	P55786	Puromycin-sensitive aminopeptidase	NPEPPS	103 kDa			✓	16	28	217199	3.32629e+06		✓
34	P13797	Plastin-3	PLS3	71 kDa				16	22	237608	1.04572e+06		✓
35	Q02809	Procollagen-lysine,2-oxoglutarate 5-dioxygenase 1	PLOD1	84 kDa		✓	✓	16	21	2.21319e+06	38572820		✓
36	P13796	Plastin-2	LCP1	70 kDa			✓	16	19	1.39844e+06	5.76065e+06		✓
37	Q15063	Periostin	POSTN	93 kDa	✓	✓		16	17	89338.9	1.3535e+06		✓
38	P35527	Keratin, type I cytoskeletal 9	KRT9	62 kDa			✓	16	12	183558990	61402100		✓
39	P02533	Keratin, type I cytoskeletal 14	KRT14	52 kDa			✓	16	11	7605515	1.43947e+06		✓
40	P08779	Keratin, type I cytoskeletal 16	KRT16	51 kDa			✓	16	7	5.67629e+06	105944		✓
41	P32004	Neural cell adhesion molecule L1	L1CAM	140 kDa		✓		15	22	14227160	2.46342e+08		✓
42	P02545	Prelamin-A/C	LMNA	74 kDa				15	21	6.38336e+06	4052323		✓
43	Q12860	Contactin-1	CNTN1	113 kDa		✓	✓	15	20	2.19494e+07	324399200		✓
44	P30153	Serine/threonine-protein phosphatase 2A 65 kDa regulatory subunit A alpha isoform	PPP2R1A	65 kDa			✓	15	19	131858	2889950		✓
45	P14618	Pyruvate kinase PKM	PKM	58 kDa			✓	15	19	1.87652e+06	2.67339e+07		✓
46	P68371	Tubulin beta-4B chain	TUBB4B	50 kDa			✓	15	19	1.77703e+06	5.13248e+07		✓
47	P07437	Tubulin beta chain	TUBB	50 kDa			✓	15	19	5.63988e+06	4.73259e+07		✓
48	P08670	Vimentin	VIM	54 kDa			✓	15	19	284015	1.63332e+07		✓
49	P49747	Cartilage oligomeric matrix protein	COMP	83 kDa	✓	✓	✓	15	14	1553534	1.13088e+07		✓
50	P10586	Receptor-type tyrosine-protein phosphatase F	PTPRF	213 kDa		✓	✓	14	32	698006	2.7685e+07		✓
51	P55060	Exportin-2	CSE1L	110 kDa			✓	14	24	3120139	2.85063e+07		✓
52	P19021	Peptidyl-glycine alpha-amidating monooxygenase	PAM	108 kDa		✓	✓	14	21	1761575	19083260		✓
53	P23142	Fibulin-1	FBLN1	77 kDa	✓	✓	✓	14	16	8.11575e+06	147458300		✓
54	Q9UBG0	C-type mannose receptor 2	MRC2	167 kDa		✓		14	11	480980	113354		✓
55	P31327	Carbamoyl-phosphate synthase [ammonia], mitochondrial	CPS1	165 kDa	✓			13	33	3.82064e+06	3.64788e+07		✓
56	P08603	Complement factor H	CFH	139 kDa	✓	✓	✓	13	26	7759148	8.53366e+07		✓
57	P11047	Laminin subunit gamma-1	LAMC1	178 kDa	✓	✓	✓	13	24	1.97134e+06	3.21657e+07		✓
58	P02786	Transferrin receptor protein 1	TFRC	85 kDa			✓	13	20	2764268	33913720		✓
59	O00410	Importin-5	IPO5	124 kDa				13	19	368920	2.42178e+06		✓
60	Q10471	Polypeptide N-acetylgalactosaminyltransferase 2	GALNT2	65 kDa				13	18	1.02863e+06	5.09929e+06		✓
61	Q13885	Tubulin beta-2A chain	TUBB2A	50 kDa			✓	13	18	1.01035e+06	3.85197e+06		✓
62	Q13275	Semaphorin-3F	SEMA3F	88 kDa	✓	✓		13	16	1.31124e+06	35816040		✓
63	P04114	Apolipoprotein B-100	APOB	516 kDa	✓	✓	✓	13	16	1.68995e+08	2250871000		✓
64	P06396	Gelsolin	GSN	86 kDa	✓	✓	✓	13	15	1.75017e+06	33973550		✓
65	P07355	Annexin A2	ANXA2	39 kDa	✓		✓	13	15	4046476	4.03113e+07		✓
66	P35443	Thrombospondin-4	THBS4	106 kDa	✓	✓	✓	13	15	7.0776e+06	1.02558e+08		✓
67	Q04695	Keratin, type I cytoskeletal 17	KRT17	48 kDa				13	14	2.51199e+06	8143075		✓
68	P13646	Keratin, type I cytoskeletal 13	KRT13	50 kDa			✓	13	7	1.35636e+07	1.49103e+06		✓
69	P36871	Phosphoglucomutase-1	PGM1	61 kDa			✓	13		378810		✓
70	P49327	Fatty acid synthase	FASN	273 kDa			✓	12	47	1.70731e+06	4.98573e+07		✓
71	P53396	ATP-citrate synthase	ACLY	121 kDa			✓	12	24	131876	4.30841e+06		✓
72	Q99985	Semaphorin-3C	SEMA3C	85 kDa	✓	✓	✓	12	21	602949	1.2546e+07		✓
73	P14625	Endoplasmin	HSP90B1	92 kDa		✓	✓	12	19	52875.8	7.11578e+06		✓
74	P04350	Tubulin beta-4A chain	TUBB4A	50 kDa			✓	12	17	391741	3.74366e+06		✓
75	O94985	Calsyntenin-1	CLSTN1	110 kDa		✓		12	15	1.01978e+07	7.44969e+07		✓
76	P07686	Beta-hexosaminidase subunit beta	HEXB	63 kDa		✓	✓	12	15	8634482	8.49779e+07		✓
77	P28799	Progranulin	GRN	64 kDa	✓	✓	✓	12	14	11323880	84635770		✓
78	Q99435	Protein kinase C-binding protein NELL2	NELL2	91 kDa		✓		12	14	2.81018e+06	23543500		✓
79	P06733	Alpha-enolase	ENO1	47 kDa			✓	12	11	1.47213e+07	8.36536e+07		✓
80	Q15149	Plectin	PLEC	532 kDa			✓	11	48	663400	35114430		✓
81	Q14517	Protocadherin Fat 1	FAT1	506 kDa		✓	✓	11	47	263465	2.45639e+07		✓
82	Q6UVK1	Chondroitin sulfate proteoglycan 4	CSPG4	251 kDa		✓	✓	11	37	392348	6.77756e+07		✓
83	P46940	Ras GTPase-activating-like protein IQGAP1	IQGAP1	189 kDa			✓	11	33	88995.9	12627410		✓
84	P11717	Cation-independent mannose-6-phosphate receptor	IGF2R	274 kDa		✓	✓	11	29	1.91111e+07	2.61541e+08		✓
85	Q13214	Semaphorin-3B	SEMA3B	83 kDa	✓	✓		11	16	9.42281e+06	141236600		✓
86	P22105	Tenascin-X	TNXB	458 kDa	✓	✓	✓	11	16	523779	2.68018e+07		✓
87	P31948	Stress-induced-phosphoprotein 1	STIP1	63 kDa				11	16	Missing Value	6.84827e+06		✓
88	P07602	Prosaposin	PSAP	58 kDa		✓	✓	11	14	2.59785e+07	1.6689e+08		✓
89	P09923	Intestinal-type alkaline phosphatase	ALPI	57 kDa		✓		11	13	1.21064e+07	1.54393e+08		✓
90	Q16851	UTP--glucose-1-phosphate uridylyltransferase	UGP2	57 kDa			✓	11	13	34636.6	130181		✓
91	Q13421	Mesothelin	MSLN	69 kDa		✓		11	10	1.13462e+07	33869240		✓
92	P12259	Coagulation factor V	F5	252 kDa	✓	✓		11	9	3.27738e+07	238691929		✓
93	Q7Z794	Keratin, type II cytoskeletal 1b	KRT77	62 kDa			✓	11	4	68047270	1.9753e+07		✓
94	P24043	Laminin subunit alpha-2	LAMA2	344 kDa	✓	✓		10	28	37562.8	14629330		✓
95	P13497	Bone morphogenetic protein 1	BMP1	111 kDa	✓	✓		10	24	758293	10345810		✓
96	P50990	T-complex protein 1 subunit theta	CCT8	60 kDa			✓	10	23	480107	1.74971e+07		✓
97	P09874	Poly [ADP-ribose] polymerase 1	PARP1	113 kDa				10	19	970951	2.10742e+07		✓
98	Q9Y6N7	Roundabout homolog 1	ROBO1	181 kDa		✓		10	19	855058	1.78505e+07		✓
99	P22314	Ubiquitin-like modifier-activating enzyme 1	UBA1	118 kDa			✓	10	18	703662	1.1764e+07		✓
100	P26639	Threonine--tRNA ligase 1, cytoplasmic	TARS1	83 kDa			✓	10	18	102722	7.37404e+06		✓
101	P08581	Hepatocyte growth factor receptor	MET	156 kDa		✓		10	17	3.01513e+06	5.91299e+07		✓
102	Q08380	Galectin-3-binding protein	LGALS3BP	65 kDa	✓	✓	✓	10	16	9.7427e+07	1.58834e+09		✓
103	P00558	Phosphoglycerate kinase 1	PGK1	45 kDa			✓	10	15	850590	1.79622e+07		✓
104	Q13509	Tubulin beta-3 chain	TUBB3	50 kDa			✓	10	15	Missing Value	71066		✓
105	P11413	Glucose-6-phosphate 1-dehydrogenase	G6PD	59 kDa			✓	10	15	278816	3.32528e+06		✓
106	O14786	Neuropilin-1	NRP1	103 kDa		✓		10	14	89035.3	3.35182e+06		✓
107	P12109	Collagen alpha-1(VI) chain	COL6A1	109 kDa	✓	✓	✓	10	12	1.21842e+07	3.85074e+07		✓
108	P30041	Peroxiredoxin-6	PRDX6	25 kDa			✓	10	10	4.74228e+06	1.68701e+07		✓
109	P10909	Clusterin	CLU	52 kDa	✓	✓	✓	10	9	99195530	1.68549e+09		✓
110	P04075	Fructose-bisphosphate aldolase A	ALDOA	39 kDa			✓	10	9	1296302	2.05342e+06		✓
111	P09651	Heterogeneous nuclear ribonucleoprotein A1	HNRNPA1	39 kDa			✓	10		8.02967e+06		✓
112	P0C0L4	Complement C4-A	C4A	193 kDa	✓	✓	✓	10		4.5717e+07		✓
113	O00429	Dynamin-1-like protein	DNM1L	82 kDa				9	22	1.62361e+06	3.29209e+07		✓
114	O60568	Multifunctional procollagen lysine hydroxylase and glycosyltransferase LH3	PLOD3	85 kDa	✓	✓	✓	9	21	1.55763e+06	25730050		✓
115	Q02790	Peptidyl-prolyl cis-trans isomerase FKBP4	FKBP4	52 kDa			✓	9	21	568293	1.7181e+07		✓
116	P07384	Calpain-1 catalytic subunit	CAPN1	82 kDa			✓	9	17	Missing Value	3.37225e+06		✓
117	Q9Y4K0	Lysyl oxidase homolog 2	LOXL2	87 kDa	✓	✓		9	16	2.69921e+06	7.36846e+07		✓
118	Q8NBP7	Proprotein convertase subtilisin/kexin type 9	PCSK9	74 kDa	✓	✓		9	15	1.46263e+07	2.08227e+08		✓
119	P05067	Amyloid-beta precursor protein	APP	87 kDa		✓	✓	9	15	8.41594e+06	5.05041e+06		✓
120	Q9H4F8	SPARC-related modular calcium-binding protein 1	SMOC1	48 kDa	✓	✓		9	15	2.37861e+07	7.12245e+07		✓
121	P23526	Adenosylhomocysteinase	AHCY	48 kDa			✓	9	15	1.20519e+07	1.42626e+08		✓
122	P30101	Protein disulfide-isomerase A3	PDIA3	57 kDa		✓	✓	9	15	241714	8043197		✓
123	P07237	Protein disulfide-isomerase	P4HB	57 kDa	✓	✓	✓	9	15	49860.9	5.60154e+06		✓
124	P00338	L-lactate dehydrogenase A chain	LDHA	37 kDa			✓	9	13	1.61882e+07	30870590		✓
125	Q92859	Neogenin	NEO1	160 kDa		✓		9	13	463287	1.48273e+07		✓
126	O75083	WD repeat-containing protein 1	WDR1	66 kDa			✓	9	11	4.11735e+06	4.04906e+07		✓
127	Q8NBJ4	Golgi membrane protein 1	GOLM1	45 kDa				9	11	7.85468e+06	1.18174e+08		✓
128	Q99538	Legumain	LGMN	49 kDa		✓	✓	9	11	3258422	50137540		✓
129	O75891	Cytosolic 10-formyltetrahydrofolate dehydrogenase	ALDH1L1	99 kDa			✓	9	11	1.14e+06	1.89227e+07		✓
130	P12111	Collagen alpha-3(VI) chain	COL6A3	344 kDa	✓	✓	✓	9	11	5.95729e+06	1.35569e+07		✓
131	Q6YHK3	CD109 antigen	CD109	162 kDa		✓		9	11	1.25888e+06	5.31529e+06		✓
132	Q58FF8	Putative heat shock protein HSP 90-beta 2	HSP90AB2P	44 kDa			✓	9	10	9.05324e+06	57298180		✓
133	P55287	Cadherin-11	CDH11	88 kDa		✓	✓	9	10	1.7337e+07	1.10693e+08		✓
134	P29401	Transketolase	TKT	68 kDa			✓	9	9	3153914	1.87771e+07		✓
135	P50454	Serpin H1	SERPINH1	46 kDa		✓		9	9	853721	3.02233e+06		✓
136	P06865	Beta-hexosaminidase subunit alpha	HEXA	61 kDa		✓	✓	9	9	3679883	38241330		✓
137	Q92820	Gamma-glutamyl hydrolase	GGH	36 kDa		✓	✓	9	9	6.87077e+06	1.45985e+08		✓
138	P60174	Triosephosphate isomerase	TPI1	31 kDa			✓	9	8	1458708	215973		✓
139	P35237	Serpin B6	SERPINB6	43 kDa			✓	9	7	1.37959e+06	2.46479e+06		✓
140	Q13228	Methanethiol oxidase	SELENBP1	52 kDa			✓	9	7	1.80663e+06	4.75872e+06		✓
141	P22626	Heterogeneous nuclear ribonucleoproteins A2/B1	HNRNPA2B1	37 kDa			✓	9		11463500		✓
142	Q04756	Hepatocyte growth factor activator	HGFAC	71 kDa	✓	✓		9		48716.8		✓
143	P09960	Leukotriene A-4 hydrolase	LTA4H	69 kDa			✓	9		468628		✓
144	Q14315	Filamin-C	FLNC	291 kDa				8	31	5831721	900674		✓
145	P07814	Bifunctional glutamate/proline--tRNA ligase	EPRS1	171 kDa				8	28	163853	9.51423e+06		✓
146	Q13332	Receptor-type tyrosine-protein phosphatase S	PTPRS	217 kDa		✓	✓	8	23	91590.5	5.01125e+06		✓
147	P49588	Alanine--tRNA ligase, cytoplasmic	AARS1	107 kDa			✓	8	21	68510	1.03204e+07		✓
148	Q06124	Tyrosine-protein phosphatase non-receptor type 11	PTPN11	68 kDa				8	17	1.44206e+06	1.06234e+06		✓
149	P01130	Low-density lipoprotein receptor	LDLR	95 kDa		✓		8	15	2.52866e+06	3.85813e+07		✓
150	P35052	Glypican-1	GPC1	62 kDa		✓	✓	8	15	1658969	7.45579e+07		✓
151	Q16610	Extracellular matrix protein 1	ECM1	61 kDa	✓	✓	✓	8	14	2.79216e+06	30586400		✓
152	Q08629	Testican-1	SPOCK1	49 kDa	✓	✓		8	13	11414472	2.29887e+08		✓
153	P61978	Heterogeneous nuclear ribonucleoprotein K	HNRNPK	51 kDa			✓	8	13	7.18329e+06	7.50539e+07		✓
154	O00462	Beta-mannosidase	MANBA	101 kDa		✓		8	12	1.64403e+06	10092838		✓
155	O00469	Procollagen-lysine,2-oxoglutarate 5-dioxygenase 2	PLOD2	85 kDa		✓	✓	8	12	1.2289e+06	5.60004e+06		✓
156	P13591	Neural cell adhesion molecule 1	NCAM1	95 kDa		✓		8	11	3.0704e+06	9.44564e+07		✓
157	P04406	Glyceraldehyde-3-phosphate dehydrogenase	GAPDH	36 kDa			✓	8	10	1.76983e+07	2.33737e+08		✓
158	Q9BRK5	45 kDa calcium-binding protein	SDF4	42 kDa		✓	✓	8	10	5.49666e+06	6.54162e+07		✓
159	P60900	Proteasome subunit alpha type-6	PSMA6	27 kDa			✓	8	10	9.61496e+06	2.3596e+08		✓
160	P63244	Receptor of activated protein C kinase 1	RACK1	35 kDa			✓	8	10	4.15866e+06	4.82334e+07		✓
161	P04040	Catalase	CAT	60 kDa			✓	8	10	1.10617e+06	403541		✓
162	O00299	Chloride intracellular channel protein 1	CLIC1	27 kDa			✓	8	9	1570503	8.66017e+06		✓
163	Q9UBR2	Cathepsin Z	CTSZ	34 kDa		✓	✓	8	8	20976770	4.03677e+07		✓
164	P07195	L-lactate dehydrogenase B chain	LDHB	37 kDa			✓	8	8	1.98454e+06	5205506		✓
165	P37802	Transgelin-2	TAGLN2	22 kDa			✓	8	8	708358	1.1107e+06		✓
166	P00491	Purine nucleoside phosphorylase	PNP	32 kDa	✓		✓	8	8	1.91098e+06	5.44013e+06		✓
167	P22392	Nucleoside diphosphate kinase B	NME2	17 kDa			✓	8	8	2.23167e+06	14011340		✓
168	P31944	Caspase-14	CASP14	28 kDa				8	6	1.07165e+06	1.59639e+06		✓
169	P02771	Alpha-fetoprotein	AFP	69 kDa	✓	✓		8	6	2.19421e+08	6571902		✓
170	Q14118	Dystroglycan	DAG1	97 kDa		✓	✓	8	5	3.45277e+06	295908		✓
171	P54802	Alpha-N-acetylglucosaminidase	NAGLU	82 kDa		✓	✓	8	3	2597753	1.54839e+06		✓
172	Q8IUL8	Cartilage intermediate layer protein 2	CILP2	126 kDa	✓	✓	✓	8		153644		✓
173	P52209	6-phosphogluconate dehydrogenase, decarboxylating	PGD	53 kDa			✓	8		15471		✓
174	O75874	Isocitrate dehydrogenase [NADP] cytoplasmic	IDH1	47 kDa			✓	8		68669		✓
175	Q9HCK4	Roundabout homolog 2	ROBO2	151 kDa		✓	✓	7	20	1.89908e+06	7.70258e+06		✓
176	P49736	DNA replication licensing factor MCM2	MCM2	102 kDa				7	17	526692	2.01373e+07		✓
177	Q16555	Dihydropyrimidinase-related protein 2	DPYSL2	62 kDa			✓	7	15	261522	4711748		✓
178	Q86TH1	ADAMTS-like protein 2	ADAMTSL2	105 kDa	✓	✓		7	15	30079.5	2291473		✓
179	P48643	T-complex protein 1 subunit epsilon	CCT5	60 kDa			✓	7	15	1.20428e+06	35951440		✓
180	Q13418	Integrin-linked protein kinase	ILK	51 kDa				7	14	5814302	1.47482e+08		✓
181	Q16706	Alpha-mannosidase 2	MAN2A1	131 kDa			✓	7	14	412053	1.42617e+07		✓
182	P31939	Bifunctional purine biosynthesis protein PURH	ATIC	65 kDa			✓	7	13	492911	1.83203e+07		✓
183	Q01813	ATP-dependent 6-phosphofructokinase, platelet type	PFKP	86 kDa			✓	7	13	464021	9.12041e+06		✓
184	Q9UKU9	Angiopoietin-related protein 2	ANGPTL2	57 kDa	✓	✓	✓	7	11	2988948	1.3192e+07		✓
185	Q99574	Neuroserpin	SERPINI1	46 kDa	✓	✓	✓	7	11	4.56626e+06	2.22084e+07		✓
186	P29692	Elongation factor 1-delta	EEF1D	31 kDa				7	10	2658009	3.31259e+07		✓
187	P48059	LIM and senescent cell antigen-like-containing domain protein 1	LIMS1	37 kDa				7	10	3.80512e+06	8.197e+07		✓
188	P00450	Ceruloplasmin	CP	122 kDa	✓	✓	✓	7	10	6.76743e+06	7.4303e+07		✓
189	P08195	4F2 cell-surface antigen heavy chain	SLC3A2	68 kDa			✓	7	10	3.07007e+06	3.68527e+07		✓
190	P07858	Cathepsin B	CTSB	38 kDa	✓	✓	✓	7	10	5.03776e+06	1.21733e+08		✓
191	P26641	Elongation factor 1-gamma	EEF1G	50 kDa			✓	7	10	1.73068e+06	3.20226e+07		✓
192	O95084	Serine protease 23	PRSS23	43 kDa	✓	✓	✓	7	10	7619912	4.15782e+08		✓
193	Q13510	Acid ceramidase	ASAH1	45 kDa		✓	✓	7	10	1.39825e+06	9.91492e+06		✓
194	Q9Y696	Chloride intracellular channel protein 4	CLIC4	29 kDa			✓	7	10	285067	3.38243e+06		✓
195	Q12884	Prolyl endopeptidase FAP	FAP	88 kDa	✓			7	10	99117.3	4.23745e+06		✓
196	P49591	Serine--tRNA ligase, cytoplasmic	SARS1	59 kDa			✓	7	10	1.02504e+06	1345030		✓
197	Q9H6X2	Anthrax toxin receptor 1	ANTXR1	63 kDa		✓		7	9	1.39803e+06	1.10837e+07		✓
198	P48506	Glutamate--cysteine ligase catalytic subunit	GCLC	73 kDa				7	9	316997	1.47682e+06		✓
199	O43175	D-3-phosphoglycerate dehydrogenase	PHGDH	57 kDa			✓	7	9	692570	6.57227e+06		✓
200	P04424	Argininosuccinate lyase	ASL	52 kDa			✓	7	9	532311	3.87009e+06		✓
201	Q12805	EGF-containing fibulin-like extracellular matrix protein 1	EFEMP1	55 kDa	✓	✓	✓	7	9	1.49971e+07	2.19299e+07		✓
202	P04275	von Willebrand factor	VWF	309 kDa	✓	✓	✓	7	9	904532	3.01372e+07		✓
203	Q15818	Neuronal pentraxin-1	NPTX1	47 kDa	✓	✓		7	8	14085920	3.337e+06		✓
204	P35625	Metalloproteinase inhibitor 3	TIMP3	24 kDa	✓	✓		7	8	2227512	2.98362e+07		✓
205	P11362	Fibroblast growth factor receptor 1	FGFR1	92 kDa		✓		7	8	719271	9.59183e+06		✓
206	P07339	Cathepsin D	CTSD	45 kDa	✓	✓	✓	7	8	4.19192e+06	1.61938e+07		✓
207	P22692	Insulin-like growth factor-binding protein 4	IGFBP4	28 kDa	✓	✓		7	7	460751	1.12728e+06		✓
208	P53634	Dipeptidyl peptidase 1	CTSC	52 kDa		✓	✓	7	7	3067157	8369611		✓
209	P05089	Arginase-1	ARG1	35 kDa	✓			7	6	136150	30722		✓
210	A5A3E0	POTE ankyrin domain family member F	POTEF	121 kDa			✓	7	6	3.0092e+06	3.13812e+06		✓
211	Q9Y617	Phosphoserine aminotransferase	PSAT1	40 kDa			✓	7	4	3.3179e+06	1.18386e+07		✓
212	P61160	Actin-related protein 2	ACTR2	45 kDa			✓	7		4806370		✓
213	P06744	Glucose-6-phosphate isomerase	GPI	63 kDa			✓	7		1.56045e+06		✓
214	P00533	Epidermal growth factor receptor	EGFR	134 kDa		✓		7		1.99884e+06		✓
215	P55290	Cadherin-13	CDH13	78 kDa		✓	✓	7		95635.4		✓
216	P05787	Keratin, type II cytoskeletal 8	KRT8	54 kDa			✓	6	18	476305	34088140		✓
217	P41250	Glycine--tRNA ligase	GARS1	83 kDa			✓	6	14	Missing Value	1.18705e+07		✓
218	P40227	T-complex protein 1 subunit zeta	CCT6A	58 kDa			✓	6	12	348042	7.87217e+06		✓
219	Q8NDA2	Hemicentin-2	HMCN2	542 kDa	✓			6	11	911196	11221481		✓
220	P51858	Hepatoma-derived growth factor	HDGF	27 kDa				6	10	2.4257e+06	3540426		✓
221	O75882	Attractin	ATRN	159 kDa		✓	✓	6	10	33427.1	5142840		✓
222	P29279	CCN family member 2	CCN2	38 kDa	✓	✓		6	9	1.13953e+06	1.80271e+07		✓
223	P00746	Complement factor D	CFD	27 kDa	✓	✓	✓	6	8	2.69434e+06	4.24515e+07		✓
224	P20618	Proteasome subunit beta type-1	PSMB1	26 kDa			✓	6	8	2.67869e+06	1.16382e+08		✓
225	P04083	Annexin A1	ANXA1	39 kDa	✓		✓	6	8	2.7902e+06	1.64255e+07		✓
226	Q9BTY2	Plasma alpha-L-fucosidase	FUCA2	54 kDa	✓	✓	✓	6	8	8988021	36065270		✓
227	P02458	Collagen alpha-1(II) chain	COL2A1	142 kDa	✓	✓		6	8	1.79592e+07	2.98983e+08		✓
228	Q7Z7G0	Target of Nesh-SH3	ABI3BP	119 kDa	✓	✓		6	7	11978960	1.6286e+07		✓
229	Q9UI42	Carboxypeptidase A4	CPA4	47 kDa	✓	✓		6	7	7.12673e+06	6999185		✓
230	P23284	Peptidyl-prolyl cis-trans isomerase B	PPIB	24 kDa	✓	✓	✓	6	7	5307312	4.31138e+07		✓
231	O75787	Renin receptor	ATP6AP2	39 kDa		✓	✓	6	7	2.33636e+06	24297750		✓
232	P35590	Tyrosine-protein kinase receptor Tie-1	TIE1	125 kDa		✓		6	7	112045	1359362		✓
233	P69905	Hemoglobin subunit alpha	HBA1	15 kDa			✓	6	7	8.52978e+08	918883100		✓
234	Q06830	Peroxiredoxin-1	PRDX1	22 kDa			✓	6	6	541454	3.48191e+06		✓
235	P15586	N-acetylglucosamine-6-sulfatase	GNS	62 kDa		✓	✓	6	6	1174729	1.71743e+07		✓
236	Q9UM22	Mammalian ependymin-related protein 1	EPDR1	25 kDa		✓		6	6	2.16125e+06	5195848		✓
237	P15531	Nucleoside diphosphate kinase A	NME1	17 kDa			✓	6	6	1398694	1.31026e+07		✓
238	O00533	Neural cell adhesion molecule L1-like protein	CHL1	135 kDa		✓	✓	6	6	300663	4430587		✓
239	Q14117	Dihydropyrimidinase	DPYS	57 kDa			✓	6	5	653194	849007		✓
240	P20774	Mimecan	OGN	34 kDa	✓	✓	✓	6	5	1.20355e+07	9.31132e+07		✓
241	Q8NCC3	Phospholipase A2 group XV	PLA2G15	47 kDa		✓	✓	6	4	1742446	587258		✓
242	P24844	Myosin regulatory light polypeptide 9	MYL9	20 kDa				6		202877		✓
243	P40926	Malate dehydrogenase, mitochondrial	MDH2	36 kDa			✓	6		2.85834e+06		✓
244	P40925	Malate dehydrogenase, cytoplasmic	MDH1	36 kDa			✓	6		8.51896e+06		✓
245	P11217	Glycogen phosphorylase, muscle form	PYGM	97 kDa			✓	6		16242.9		✓
246	P12035	Keratin, type II cytoskeletal 3	KRT3	64 kDa			✓	6		3.19315e+06		✓
247	Q08211	ATP-dependent RNA helicase A	DHX9	141 kDa				5	21	1.10613e+06	2.49558e+07		✓
248	Q02388	Collagen alpha-1(VII) chain	COL7A1	295 kDa	✓	✓		5	21	521281	23320850		✓
249	P15311	Ezrin	EZR	69 kDa			✓	5	19	136982	1.45301e+07		✓
250	Q14697	Neutral alpha-glucosidase AB	GANAB	107 kDa		✓	✓	5	18	275736	2.39484e+07		✓
251	P11586	C-1-tetrahydrofolate synthase, cytoplasmic	MTHFD1	102 kDa			✓	5	18	131696	1.05754e+07		✓
252	Q06481	Amyloid-like protein 2	APLP2	87 kDa		✓	✓	5	17	2.30989e+06	38468420		✓
253	O00622	CCN family member 1	CCN1	42 kDa	✓	✓		5	14	3187760	92265880		✓
254	Q09666	Neuroblast differentiation-associated protein AHNAK	AHNAK	629 kDa			✓	5	14	331438	2.20173e+06		✓
255	P00751	Complement factor B	CFB	86 kDa	✓	✓	✓	5	13	3.91744e+06	1.06872e+07		✓
256	P10253	Lysosomal alpha-glucosidase	GAA	105 kDa		✓	✓	5	12	1.0712e+06	23788150		✓
257	Q32P28	Prolyl 3-hydroxylase 1	P3H1	83 kDa		✓	✓	5	12	806920	1.0187e+07		✓
258	P49407	Beta-arrestin-1	ARRB1	47 kDa				5	11	940272	2.25599e+07		✓
259	P17936	Insulin-like growth factor-binding protein 3	IGFBP3	32 kDa	✓	✓		5	10	9231427	2.15445e+08		✓
260	P43034	Platelet-activating factor acetylhydrolase IB subunit alpha	PAFAH1B1	47 kDa			✓	5	10	1.35805e+06	8318041		✓
261	Q04721	Neurogenic locus notch homolog protein 2	NOTCH2	265 kDa		✓		5	10	2.24971e+06	2.29959e+07		✓
262	Q9UL46	Proteasome activator complex subunit 2	PSME2	27 kDa			✓	5	9	1.46763e+06	13408410		✓
263	P00492	Hypoxanthine-guanine phosphoribosyltransferase	HPRT1	25 kDa			✓	5	9	138967	302744		✓
264	P16278	Beta-galactosidase	GLB1	76 kDa		✓	✓	5	9	201106	9.25818e+06		✓
265	P08758	Annexin A5	ANXA5	36 kDa			✓	5	9	378582	3909017		✓
266	Q16658	Fascin	FSCN1	55 kDa			✓	5	8	330590	6680943		✓
267	P20908	Collagen alpha-1(V) chain	COL5A1	184 kDa	✓	✓		5	7	3611236	29214990		✓
268	P00747	Plasminogen	PLG	91 kDa	✓	✓	✓	5	7	6951500	4.36668e+06		✓
269	P23381	Tryptophan--tRNA ligase, cytoplasmic	WARS1	53 kDa			✓	5	7	369535	7403682		✓
270	P06280	Alpha-galactosidase A	GLA	49 kDa		✓	✓	5	7	5.27546e+06	4.11355e+07		✓
271	P04004	Vitronectin	VTN	54 kDa	✓	✓	✓	5	7	1412679	3.67582e+07		✓
272	Q16719	Kynureninase	KYNU	52 kDa				5	7	619940	8.09594e+06		✓
273	P21291	Cysteine and glycine-rich protein 1	CSRP1	21 kDa			✓	5	7	203527	981382		✓
274	P16152	Carbonyl reductase [NADPH] 1	CBR1	30 kDa			✓	5	7	694938	959572		✓
275	Q9HB40	Retinoid-inducible serine carboxypeptidase	SCPEP1	51 kDa	✓	✓	✓	5	7	376782	15360150		✓
276	P07711	Cathepsin L1	CTSL	38 kDa		✓	✓	5	6	8.89981e+06	56677280		✓
277	P26927	Hepatocyte growth factor-like protein	MST1	80 kDa	✓	✓		5	6	637324	2.83786e+06		✓
278	P84085	ADP-ribosylation factor 5	ARF5	21 kDa			✓	5	6	844370	2.87041e+07		✓
279	Q9NPH2	Inositol-3-phosphate synthase 1	ISYNA1	61 kDa				5	6	2275176	2.05686e+07		✓
280	Q562R1	Beta-actin-like protein 2	ACTBL2	42 kDa			✓	5	6	220666	1432016000		✓
281	P01031	Complement C5	C5	188 kDa	✓	✓	✓	5	5	1.26839e+07	361099800		✓
282	P02774	Vitamin D-binding protein	GC	53 kDa	✓	✓	✓	5	4	224377700	3.06519e+07		✓
283	P17931	Galectin-3	LGALS3	26 kDa	✓		✓	5	4	2.04153e+06	779433		✓
284	P68036	Ubiquitin-conjugating enzyme E2 L3	UBE2L3	18 kDa				5	4	3.08634e+06	2.73122e+06		✓
285	P32119	Peroxiredoxin-2	PRDX2	22 kDa			✓	5	4	1.09631e+06	5988940		✓
286	Q96D15	Reticulocalbin-3	RCN3	37 kDa		✓		5	4	182390	7.1322e+06		✓
287	P00505	Aspartate aminotransferase, mitochondrial	GOT2	48 kDa			✓	5	3	904382	481729		✓
288	Q86YZ3	Hornerin	HRNR	282 kDa			✓	5	2	1873861	138911		✓
289	O76076	CCN family member 5	CCN5	27 kDa	✓	✓		5	2	1.72028e+06	590721		✓
290	P14550	Aldo-keto reductase family 1 member A1	AKR1A1	37 kDa			✓	5	2	3.50526e+06	871968		✓
291	Q15555	Microtubule-associated protein RP/EB family member 2	MAPRE2	37 kDa				5		4040067		✓
292	Q5D862	Filaggrin-2	FLG2	248 kDa				5		1.68805e+06		✓
293	P30086	Phosphatidylethanolamine-binding protein 1	PEBP1	21 kDa			✓	5		658902		✓
294	P25787	Proteasome subunit alpha type-2	PSMA2	26 kDa			✓	5		2.23879e+06		✓
295	O00451	GDNF family receptor alpha-2	GFRA2	52 kDa		✓		5		3276706		✓
296	Q6KB66	Keratin, type II cytoskeletal 80	KRT80	51 kDa				5		471398		✓
297	Q8N1N4	Keratin, type II cytoskeletal 78	KRT78	57 kDa			✓	5		596788		✓
298	Q9Y281	Cofilin-2	CFL2	19 kDa			✓	5		1.12526e+06		✓
299	P37837	Transaldolase	TALDO1	38 kDa			✓	5		2253568		✓
300	Q9NPR2	Semaphorin-4B	SEMA4B	93 kDa		✓		5		1.15414e+06		✓
301	P18065	Insulin-like growth factor-binding protein 2	IGFBP2	35 kDa	✓	✓	✓	5		434052		✓
302	Q9H4A4	Aminopeptidase B	RNPEP	73 kDa	✓		✓	5		675901		✓
303	Q13620	Cullin-4B	CUL4B	104 kDa			✓	4	18	123827	5923699		✓
304	O43776	Asparagine--tRNA ligase, cytoplasmic	NARS1	63 kDa			✓	4	14	124926	5.85543e+06		✓
305	P10809	60 kDa heat shock protein, mitochondrial	HSPD1	61 kDa			✓	4	12	748320	32542300		✓
306	Q7Z304	MAM domain-containing protein 2	MAMDC2	78 kDa	✓	✓		4	12	116181	6106860		✓
307	P20700	Lamin-B1	LMNB1	66 kDa				4	11	394947	1.10146e+07		✓
308	Q01518	Adenylyl cyclase-associated protein 1	CAP1	52 kDa			✓	4	11	332345	1.01435e+07		✓
309	P80303	Nucleobindin-2	NUCB2	50 kDa	✓	✓	✓	4	11	583672	8.96765e+06		✓
310	Q9NZV1	Cysteine-rich motor neuron 1 protein	CRIM1	114 kDa		✓		4	10	813337	2.1713e+07		✓
311	O14672	Disintegrin and metalloproteinase domain-containing protein 10	ADAM10	84 kDa		✓	✓	4	10	2899653	1.45887e+07		✓
312	Q96KP4	Cytosolic non-specific dipeptidase	CNDP2	53 kDa			✓	4	10	127417	6.9503e+06		✓
313	P27695	DNA-(apurinic or apyrimidinic site) lyase	APEX1	36 kDa				4	9	1.33534e+06	9796424		✓
314	P07225	Vitamin K-dependent protein S	PROS1	75 kDa		✓	✓	4	9	225680	7748500		✓
315	O00584	Ribonuclease T2	RNASET2	29 kDa	✓	✓	✓	4	9	1.42047e+06	1.66303e+07		✓
316	P27797	Calreticulin	CALR	48 kDa		✓	✓	4	9	2.02514e+06	2.60195e+07		✓
317	Q15084	Protein disulfide-isomerase A6	PDIA6	48 kDa		✓	✓	4	8	1413343	1705488		✓
318	Q9HBI1	Beta-parvin	PARVB	42 kDa				4	8	602655	5.03735e+06		✓
319	O14657	Torsin-1B	TOR1B	38 kDa		✓	✓	4	8	821517	2.48084e+07		✓
320	Q6IBS0	Twinfilin-2	TWF2	40 kDa			✓	4	8	228162	5.12584e+06		✓
321	P59998	Actin-related protein 2/3 complex subunit 4	ARPC4	20 kDa			✓	4	8	2.50346e+06	8.055e+07		✓
322	O94907	Dickkopf-related protein 1	DKK1	29 kDa	✓	✓		4	7	794549	1.92487e+07		✓
323	P80723	Brain acid soluble protein 1	BASP1	23 kDa			✓	4	7	321555	1.53143e+07		✓
324	P41221	Protein Wnt-5a	WNT5A	42 kDa	✓	✓	✓	4	7	927793	16690750		✓
325	O15143	Actin-related protein 2/3 complex subunit 1B	ARPC1B	41 kDa			✓	4	7	Missing Value	1.55519e+06		✓
326	Q8NCH0	Carbohydrate sulfotransferase 14	CHST14	43 kDa			✓	4	7	679493	9.51562e+06		✓
327	O15232	Matrilin-3	MATN3	53 kDa	✓	✓		4	6	69795	623984		✓
328	P08572	Collagen alpha-2(IV) chain	COL4A2	168 kDa	✓	✓	✓	4	6	676780	1.22403e+07		✓
329	Q13308	Inactive tyrosine-protein kinase 7	PTK7	118 kDa		✓		4	6	428836	7.28736e+06		✓
330	O95633	Follistatin-related protein 3	FSTL3	28 kDa	✓	✓		4	5	439630	9.41867e+06		✓
331	P08174	Complement decay-accelerating factor	CD55	41 kDa		✓	✓	4	5	6419021	3.49707e+07		✓
332	P50897	Palmitoyl-protein thioesterase 1	PPT1	34 kDa		✓	✓	4	5	544340	3.36856e+06		✓
333	P16070	CD44 antigen	CD44	82 kDa		✓	✓	4	5	1.54208e+06	5.60481e+06		✓
334	O76003	Glutaredoxin-3	GLRX3	37 kDa				4	5	588805	6591310		✓
335	Q13444	Disintegrin and metalloproteinase domain-containing protein 15	ADAM15	93 kDa		✓	✓	4	4	550563	2.38014e+06		✓
336	O00115	Deoxyribonuclease-2-alpha	DNASE2	40 kDa		✓	✓	4	4	6695658	4.1142e+06		✓
337	P07737	Profilin-1	PFN1	15 kDa			✓	4	4	5602964	286264		✓
338	P02462	Collagen alpha-1(IV) chain	COL4A1	161 kDa	✓	✓		4	4	201342	2876576		✓
339	P62937	Peptidyl-prolyl cis-trans isomerase A	PPIA	18 kDa	✓		✓	4	4	1.82671e+07	2.45586e+08		✓
340	O75347	Tubulin-specific chaperone A	TBCA	13 kDa				4	4	80068	155670		✓
341	Q14376	UDP-glucose 4-epimerase	GALE	38 kDa				4	4	394265	5692828		✓
342	P01033	Metalloproteinase inhibitor 1	TIMP1	23 kDa	✓	✓	✓	4	3	51400380	4.10685e+07		✓
343	P20849	Collagen alpha-1(IX) chain	COL9A1	92 kDa	✓	✓		4	3	4.30363e+06	3.82326e+07		✓
344	O95479	GDH/6PGL endoplasmic bifunctional protein	H6PD	89 kDa		✓		4	3	211867	157581		✓
345	O75503	Ceroid-lipofuscinosis neuronal protein 5	CLN5	41 kDa		✓	✓	4	3	461454	2.26252e+06		✓
346	P49773	Histidine triad nucleotide-binding protein 1	HINT1	14 kDa			✓	4	3	1.15133e+06	3.17067e+06		✓
347	P13693	Translationally-controlled tumor protein	TPT1	20 kDa			✓	4	3	48870.2	2.09767e+06		✓
348	Q02413	Desmoglein-1	DSG1	114 kDa		✓		4	2	1.28936e+06	280667		✓
349	Q86Y46	Keratin, type II cytoskeletal 73	KRT73	59 kDa			✓	4	2	726705	5929363		✓
350	P18085	ADP-ribosylation factor 4	ARF4	21 kDa			✓	4		774220		✓
351	P19320	Vascular cell adhesion protein 1	VCAM1	81 kDa		✓	✓	4		1.2237e+07		✓
352	Q6ZNJ1	Neurobeachin-like protein 2	NBEAL2	303 kDa				3	17	135668	14662980		✓
353	P13667	Protein disulfide-isomerase A4	PDIA4	73 kDa		✓		3	17	440720	11849340		✓
354	P55884	Eukaryotic translation initiation factor 3 subunit B	EIF3B	92 kDa			✓	3	16	385159	2.51773e+06		✓
355	Q9NR30	Nucleolar RNA helicase 2	DDX21	87 kDa				3	13	409173	1.08733e+07		✓
356	Q09328	Alpha-1,6-mannosylglycoprotein 6-beta-N-acetylglucosaminyltransferase A	MGAT5	85 kDa			✓	3	12	526613	14485820		✓
357	P09871	Complement C1s subcomponent	C1S	77 kDa	✓	✓		3	12	275187	2.51972e+07		✓
358	Q6ZRP7	Sulfhydryl oxidase 2	QSOX2	78 kDa		✓		3	12	148323	6.82451e+06		✓
359	P06576	ATP synthase subunit beta, mitochondrial	ATP5F1B	57 kDa			✓	3	10	169269	6.74265e+06		✓
360	P20042	Eukaryotic translation initiation factor 2 subunit 2	EIF2S2	38 kDa				3	10	322305	3.30507e+06		✓
361	O75339	Cartilage intermediate layer protein 1	CILP	133 kDa	✓	✓	✓	3	10	1.18673e+06	4.49038e+07		✓
362	Q6UY14	ADAMTS-like protein 4	ADAMTSL4	117 kDa	✓	✓		3	10	187686	4834516		✓
363	P43121	Cell surface glycoprotein MUC18	MCAM	72 kDa		✓		3	10	929244	16707830		✓
364	P54136	Arginine--tRNA ligase, cytoplasmic	RARS1	75 kDa			✓	3	10	61512.4	3.54884e+06		✓
365	P00750	Tissue-type plasminogen activator	PLAT	63 kDa	✓	✓	✓	3	8	163324	7.02463e+06		✓
366	P04062	Lysosomal acid glucosylceramidase	GBA	60 kDa		✓	✓	3	7	894578	1.18586e+07		✓
367	P10646	Tissue factor pathway inhibitor	TFPI	35 kDa	✓	✓		3	7	1.44423e+06	6.30279e+07		✓
368	P24593	Insulin-like growth factor-binding protein 5	IGFBP5	31 kDa	✓	✓		3	6	2616098	5.9718e+07		✓
369	P00488	Coagulation factor XIII A chain	F13A1	83 kDa	✓			3	6	1.43808e+06	8.49483e+07		✓
370	P43251	Biotinidase	BTD	61 kDa	✓	✓	✓	3	6	783459	1128776		✓
371	P52292	Importin subunit alpha-1	KPNA2	58 kDa				3	6	862757	6809234		✓
372	O14773	Tripeptidyl-peptidase 1	TPP1	61 kDa		✓	✓	3	6	216739	9047820		✓
373	P22466	Galanin peptides	GAL	13 kDa	✓	✓		3	6	354791	20763610		✓
374	Q7Z406	Myosin-14	MYH14	228 kDa			✓	3	6	2.02624e+06	9.85101e+06		✓
375	P22003	Bone morphogenetic protein 5	BMP5	52 kDa	✓	✓		3	6	771790	2.13552e+07		✓
376	P37235	Hippocalcin-like protein 1	HPCAL1	22 kDa				3	6	240136	2764391		✓
377	P38571	Lysosomal acid lipase/cholesteryl ester hydrolase	LIPA	45 kDa	✓	✓		3	6	1.51968e+06	9.49023e+06		✓
378	O60513	Beta-1,4-galactosyltransferase 4	B4GALT4	40 kDa				3	6	674188	6375788		✓
379	Q9UNH7	Sorting nexin-6	SNX6	47 kDa				3	6	461126	1.00977e+07		✓
380	Q9UQP3	Tenascin-N	TNN	144 kDa	✓	✓		3	6	373478	3.81819e+06		✓
381	P43487	Ran-specific GTPase-activating protein	RANBP1	23 kDa				3	5	2.80983e+06	5.55047e+06		✓
382	P68871	Hemoglobin subunit beta	HBB	16 kDa			✓	3	5	1.01108e+06	928141		✓
383	Q8NBM8	Prenylcysteine oxidase-like	PCYOX1L	55 kDa	✓	✓		3	5	68841.6	2640456		✓
384	P01137	Transforming growth factor beta-1 proprotein	TGFB1	44 kDa	✓	✓		3	5	1640768	711360		✓
385	P36955	Pigment epithelium-derived factor	SERPINF1	46 kDa	✓	✓	✓	3	5	1.18865e+06	5.88674e+06		✓
386	Q9UBQ6	Exostosin-like 2	EXTL2	37 kDa				3	5	1.03796e+06	2.96046e+06		✓
387	P12277	Creatine kinase B-type	CKB	43 kDa			✓	3	5	90965.8	1741236		✓
388	Q9Y287	Integral membrane protein 2B	ITM2B	30 kDa			✓	3	5	49597.3	2.33937e+06		✓
389	P55212	Caspase-6	CASP6	33 kDa				3	5	451259	4.80866e+06		✓
390	P00966	Argininosuccinate synthase	ASS1	47 kDa			✓	3	4	452846	5.48007e+06		✓
391	P42785	Lysosomal Pro-X carboxypeptidase	PRCP	56 kDa		✓	✓	3	4	2.40762e+06	7.42984e+06		✓
392	P04792	Heat shock protein beta-1	HSPB1	23 kDa			✓	3	4	550400	3400202		✓
393	P03973	Antileukoproteinase	SLPI	14 kDa	✓	✓	✓	3	4	4.38041e+06	19517160		✓
394	Q14103	Heterogeneous nuclear ribonucleoprotein D0	HNRNPD	38 kDa				3	4	2.2929e+06	32207620		✓
395	O43505	Beta-1,4-glucuronyltransferase 1	B4GAT1	47 kDa			✓	3	4	2.19567e+06	3.46017e+06		✓
396	Q13443	Disintegrin and metalloproteinase domain-containing protein 9	ADAM9	91 kDa		✓	✓	3	4	1485000	2715514		✓
397	P48740	Mannan-binding lectin serine protease 1	MASP1	79 kDa	✓	✓		3	4	1.41838e+07	225033000		✓
398	P01266	Thyroglobulin	TG	305 kDa	✓	✓		3	4	1.92163e+07	1.79096e+08		✓
399	Q641Q3	Meteorin-like protein	METRNL	34 kDa	✓	✓	✓	3	4	1.21629e+06	7.62129e+06		✓
400	Q9NQ79	Cartilage acidic protein 1	CRTAC1	71 kDa	✓	✓	✓	3	4	391684	2.78055e+06		✓
401	Q9UMR5	Lysosomal thioesterase PPT2	PPT2	34 kDa		✓	✓	3	3	3.84062e+06	408801		✓
402	P15291	Beta-1,4-galactosyltransferase 1	B4GALT1	44 kDa			✓	3	3	3.65544e+06	7045034		✓
403	P08697	Alpha-2-antiplasmin	SERPINF2	55 kDa	✓	✓	✓	3	3	8622453	2.19656e+06		✓
404	P10619	Lysosomal protective protein	CTSA	54 kDa		✓	✓	3	3	507714	3.68446e+06		✓
405	P01893	Putative HLA class I histocompatibility antigen, alpha chain H	HLA-H	41 kDa		✓		3	3	2.9196e+06	775824		✓
406	P07910	Heterogeneous nuclear ribonucleoproteins C1/C2	HNRNPC	34 kDa			✓	3	3	2990272	2.6914e+07		✓
407	Q9Y6L7	Tolloid-like protein 2	TLL2	114 kDa	✓	✓		3	3	1.48754e+06	13087650		✓
408	Q15493	Regucalcin	RGN	33 kDa				3	3	2.36353e+07	5.67809e+07		✓
409	P30740	Leukocyte elastase inhibitor	SERPINB1	43 kDa			✓	3	3	410806	744447		✓
410	P28161	Glutathione S-transferase Mu 2	GSTM2	26 kDa			✓	3	3	1.68711e+06	8998666		✓
411	P30048	Thioredoxin-dependent peroxide reductase, mitochondrial	PRDX3	28 kDa				3	3	410439	431179		✓
412	P10643	Complement component C7	C7	94 kDa	✓	✓	✓	3	3	1.11084e+07	2.55593e+08		✓
413	P02753	Retinol-binding protein 4	RBP4	23 kDa	✓	✓	✓	3	3	9.24898e+07	56185610		✓
414	P12273	Prolactin-inducible protein	PIP	17 kDa	✓	✓	✓	3	3	379965	1.09187e+06		✓
415	P16035	Metalloproteinase inhibitor 2	TIMP2	24 kDa	✓	✓		3	3	1.08022e+06	2.47243e+07		✓
416	P22061	Protein-L-isoaspartate(D-aspartate) O-methyltransferase	PCMT1	25 kDa			✓	3	3	294735	343585		✓
417	P34096	Ribonuclease 4	RNASE4	17 kDa	✓	✓		3	2	2.36223e+06	3.28727e+07		✓
418	P30044	Peroxiredoxin-5, mitochondrial	PRDX5	22 kDa			✓	3	2	1.42788e+06	1310649		✓
419	P14324	Farnesyl pyrophosphate synthase	FDPS	48 kDa				3	2	302664	63288.6		✓
420	P01034	Cystatin-C	CST3	16 kDa	✓	✓	✓	3	1	7.37777e+06	771646		✓
421	P61769	Beta-2-microglobulin	B2M	14 kDa		✓	✓	3	1	2334501	1.62106e+06		✓
422	P02750	Leucine-rich alpha-2-glycoprotein	LRG1	38 kDa	✓	✓	✓	3		1.7144e+06		✓
423	Q5T749	Keratinocyte proline-rich protein	KPRP	64 kDa			✓	3		20873.9		✓
424	Q14019	Coactosin-like protein	COTL1	16 kDa			✓	3		88398.3		✓
425	O75223	Gamma-glutamylcyclotransferase	GGCT	21 kDa			✓	3		204087		✓
426	Q99650	Oncostatin-M-specific receptor subunit beta	OSMR	111 kDa		✓		3		154808		✓
427	P61916	NPC intracellular cholesterol transporter 2	NPC2	17 kDa	✓	✓	✓	3		4.34974e+06		✓
428	Q03167	Transforming growth factor beta receptor type 3	TGFBR3	94 kDa		✓	✓	3		7.03557e+06		✓
429	Q04760	Lactoylglutathione lyase	GLO1	21 kDa			✓	3		618986		✓
430	P35030	Trypsin-3	PRSS3	33 kDa	✓	✓		3		2.05683e+07		✓
431	P42357	Histidine ammonia-lyase	HAL	73 kDa				3		184497		✓
432	P78417	Glutathione S-transferase omega-1	GSTO1	28 kDa			✓	3		443109		✓
433	P36952	Serpin B5	SERPINB5	42 kDa				3		349497		✓
434	P09211	Glutathione S-transferase P	GSTP1	23 kDa			✓	3		115128		✓
435	P05546	Heparin cofactor 2	SERPIND1	57 kDa	✓	✓	✓	3		Missing Value		✓
436	P35900	Keratin, type I cytoskeletal 20	KRT20	48 kDa				3		8.14881e+06		✓
437	Q14566	DNA replication licensing factor MCM6	MCM6	93 kDa				2	18	232134	1.50395e+07		✓
438	P08729	Keratin, type II cytoskeletal 7	KRT7	51 kDa			✓	2	17	Missing Value	14715890		✓
439	Q9UHI8	A disintegrin and metalloproteinase with thrombospondin motifs 1	ADAMTS1	105 kDa		✓		2	14	61606	7050136		✓
440	P05455	Lupus La protein	SSB	47 kDa				2	13	323702	4068673		✓
441	P51665	26S proteasome non-ATPase regulatory subunit 7	PSMD7	37 kDa			✓	2	10	164406	1.89808e+07		✓
442	Q16881	Thioredoxin reductase 1, cytoplasmic	TXNRD1	71 kDa			✓	2	10	1.05676e+06	2.11943e+07		✓
443	P43490	Nicotinamide phosphoribosyltransferase	NAMPT	56 kDa	✓		✓	2	8	176258	1.53657e+06		✓
444	Q9ULV4	Coronin-1C	CORO1C	53 kDa				2	8	1297718	4032453		✓
445	P26599	Polypyrimidine tract-binding protein 1	PTBP1	57 kDa			✓	2	7	814248	2.37918e+06		✓
446	P02794	Ferritin heavy chain	FTH1	21 kDa			✓	2	7	133257	9649823		✓
447	Q9H173	Nucleotide exchange factor SIL1	SIL1	52 kDa		✓		2	7	223929	5473677		✓
448	Q99519	Sialidase-1	NEU1	45 kDa		✓	✓	2	6	394303	4522748		✓
449	P22004	Bone morphogenetic protein 6	BMP6	57 kDa	✓	✓		2	5	925750	9.54165e+06		✓
450	Q96MM7	Heparan-sulfate 6-O-sulfotransferase 2	HS6ST2	69 kDa				2	5	373263	11102120		✓
451	P29966	Myristoylated alanine-rich C-kinase substrate	MARCKS	32 kDa			✓	2	5	247970	1.54134e+06		✓
452	Q9HAT2	Sialate O-acetylesterase	SIAE	58 kDa		✓	✓	2	5	412442	3.59923e+06		✓
453	O60911	Cathepsin L2	CTSV	37 kDa		✓		2	5	439289	24644920		✓
454	Q16819	Meprin A subunit alpha	MEP1A	84 kDa		✓	✓	2	4	361382	1.31247e+06		✓
455	Q86SQ4	Adhesion G-protein coupled receptor G6	ADGRG6	137 kDa		✓		2	4	1.27464e+06	17128010		✓
456	P33316	Deoxyuridine 5'-triphosphate nucleotidohydrolase, mitochondrial	DUT	27 kDa			✓	2	4	206191	6.355e+06		✓
457	Q14914	Prostaglandin reductase 1	PTGR1	36 kDa			✓	2	4	116773	730738		✓
458	O76061	Stanniocalcin-2	STC2	33 kDa	✓	✓		2	4	128229	1676870		✓
459	P51857	Aldo-keto reductase family 1 member D1	AKR1D1	37 kDa				2	4	184382	5278942		✓
460	Q92688	Acidic leucine-rich nuclear phosphoprotein 32 family member B	ANP32B	29 kDa			✓	2	4	390405	7.98624e+06		✓
461	P31431	Syndecan-4	SDC4	22 kDa		✓	✓	2	4	865186	2.64533e+07		✓
462	Q9BXI9	Complement C1q tumor necrosis factor-related protein 6	C1QTNF6	31 kDa	✓	✓		2	4	840199	7.67693e+06		✓
463	P21941	Cartilage matrix protein	MATN1	54 kDa	✓	✓		2	4	231372	3.57172e+06		✓
464	Q9Y625	Glypican-6	GPC6	63 kDa		✓		2	4	277134	7544107		✓
465	Q9UHL4	Dipeptidyl peptidase 2	DPP7	54 kDa		✓	✓	2	4	482522	2.15539e+06		✓
466	Q9BR76	Coronin-1B	CORO1B	54 kDa			✓	2	4	61741.9	1.8588e+06		✓
467	P06748	Nucleophosmin	NPM1	33 kDa				2	3	735328	1.11191e+07		✓
468	P12643	Bone morphogenetic protein 2	BMP2	45 kDa	✓	✓		2	3	918694	6268431		✓
469	P58546	Myotrophin	MTPN	13 kDa				2	3	474059	3054240		✓
470	Q53RD9	Fibulin-7	FBLN7	47 kDa	✓	✓		2	3	125251	5.55108e+06		✓
471	P31949	Protein S100-A11	S100A11	12 kDa			✓	2	3	4.99867e+06	1.27028e+07		✓
472	Q86UD1	Out at first protein homolog	OAF	31 kDa	✓	✓		2	3	1.56354e+06	9.54465e+06		✓
473	Q93052	Lipoma-preferred partner	LPP	66 kDa				2	3	25184.4	168724		✓
474	P13987	CD59 glycoprotein	CD59	14 kDa		✓	✓	2	3	376418	7278628		✓
475	Q13642	Four and a half LIM domains protein 1	FHL1	36 kDa				2	3	57949.4	2.01303e+06		✓
476	O43399	Tumor protein D54	TPD52L2	22 kDa				2	3	401228	1.09029e+06		✓
477	P24592	Insulin-like growth factor-binding protein 6	IGFBP6	25 kDa	✓	✓		2	2	1564429	4.37818e+06		✓
478	P10599	Thioredoxin	TXN	12 kDa			✓	2	2	3808699	3894600		✓
479	Q12794	Hyaluronidase-1	HYAL1	48 kDa	✓	✓	✓	2	2	1.15358e+06	2.74968e+06		✓
480	P03952	Plasma kallikrein	KLKB1	71 kDa	✓	✓	✓	2	2	347888	4.68577e+06		✓
481	P13473	Lysosome-associated membrane glycoprotein 2	LAMP2	45 kDa		✓	✓	2	2	102897	268050		✓
482	Q9H853	Putative tubulin-like protein alpha-4B	TUBA4B	28 kDa				2	2	367323	23542080		✓
483	Q07021	Complement component 1 Q subcomponent-binding protein, mitochondrial	C1QBP	31 kDa				2	2	1.62931e+06	14624160		✓
484	P13284	Gamma-interferon-inducible lysosomal thiol reductase	IFI30	28 kDa		✓		2	2	635193	3.23185e+06		✓
485	P09467	Fructose-1,6-bisphosphatase 1	FBP1	37 kDa			✓	2	2	3129529	28138780		✓
486	P22352	Glutathione peroxidase 3	GPX3	26 kDa	✓	✓	✓	2	2	36193.3	7.7247e+06		✓
487	P31151	Protein S100-A7	S100A7	11 kDa	✓			2	2	118432	641411		✓
488	P55058	Phospholipid transfer protein	PLTP	55 kDa	✓	✓		2	2	164594	1.19895e+06		✓
489	P16401	Histone H1.5	H1-5	23 kDa				2	2	1.09385e+06	2.32248e+07		✓
490	A6NNP5	Coiled-coil domain-containing protein 169	CCDC169	25 kDa				2	2	1.15625e+06	1.3427e+07		✓
491	Q9BRF8	Serine/threonine-protein phosphatase CPPED1	CPPED1	36 kDa				2	2	141758	1.14503e+06		✓
492	P02790	Hemopexin	HPX	52 kDa	✓	✓	✓	2	1	53206780	1.79979e+07		✓
493	P05231	Interleukin-6	IL6	24 kDa	✓	✓		2	1	347550	674428		✓
494	Q9BY67	Cell adhesion molecule 1	CADM1	49 kDa		✓		2		7799138		✓
495	Q08554	Desmocollin-1	DSC1	100 kDa		✓	✓	2		537143		✓
496	P25311	Zinc-alpha-2-glycoprotein	AZGP1	34 kDa	✓	✓	✓	2		183382		✓
497	Q9P0S2	Cytochrome c oxidase assembly protein COX16 homolog, mitochondrial	COX16	12 kDa				2		398401		✓
498	Q9BRA2	Thioredoxin domain-containing protein 17	TXNDC17	14 kDa			✓	2		718166		✓
499	Q14126	Desmoglein-2	DSG2	122 kDa		✓	✓	2		139702		✓
500	P23490	Loricrin	LORICRIN	26 kDa				2		975406		✓
501	P33151	Cadherin-5	CDH5	88 kDa		✓		2		558623		✓
502	Q8NFT8	Delta and Notch-like epidermal growth factor-related receptor	DNER	78 kDa		✓		2		455933		✓
503	P04278	Sex hormone-binding globulin	SHBG	44 kDa	✓	✓	✓	2		622086		✓
504	P20930	Filaggrin	FLG	435 kDa				2		37408		✓
505	P07108	Acyl-CoA-binding protein	DBI	10 kDa			✓	2		432981		✓
506	Q08188	Protein-glutamine gamma-glutamyltransferase E	TGM3	77 kDa			✓	2		228562		✓
507	P02787	Serotransferrin	TF	77 kDa	✓	✓	✓	2		254368		✓
508	P54819	Adenylate kinase 2, mitochondrial	AK2	26 kDa			✓	2		256932		✓
509	Q9BUD6	Spondin-2	SPON2	36 kDa	✓	✓	✓	2		579866		✓
510	Q09161	Nuclear cap-binding protein subunit 1	NCBP1	92 kDa				1	9	88390.4	1.24915e+06		✓
511	P14314	Glucosidase 2 subunit beta	PRKCSH	59 kDa		✓		1	8	141255	1.8506e+07		✓
512	P30084	Enoyl-CoA hydratase, mitochondrial	ECHS1	31 kDa				1	7	Missing Value	3.71174e+06		✓
513	Q9ULF5	Zinc transporter ZIP10	SLC39A10	94 kDa		✓		1	6	1.1999e+06	2.82703e+07		✓
514	P00736	Complement C1r subcomponent	C1R	80 kDa	✓	✓	✓	1	6	2.67974e+06	8.29376e+07		✓
515	Q9UBQ0	Vacuolar protein sorting-associated protein 29	VPS29	21 kDa				1	5	98310.9	6.26665e+06		✓
516	P28062	Proteasome subunit beta type-8	PSMB8	30 kDa			✓	1	5	1134151	1907305		✓
517	Q99988	Growth/differentiation factor 15	GDF15	34 kDa	✓	✓	✓	1	4	385327	2.28333e+07		✓
518	P25815	Protein S100-P	S100P	10 kDa			✓	1	3	879527	1.40192e+07		✓
519	P48960	Adhesion G protein-coupled receptor E5	ADGRE5	92 kDa		✓	✓	1	3	1.6366e+06	2.51407e+07		✓
520	P09603	Macrophage colony-stimulating factor 1	CSF1	60 kDa		✓		1	3	263227	3.39296e+06		✓
521	Q8N335	Glycerol-3-phosphate dehydrogenase 1-like protein	GPD1L	38 kDa			✓	1	3	319433	8870915		✓
522	P36575	Arrestin-C	ARR3	43 kDa				1	3	325373	6.7152e+06		✓
523	Q92526	T-complex protein 1 subunit zeta-2	CCT6B	58 kDa				1	3	197754	4.56196e+06		✓
524	Q9H2U2	Inorganic pyrophosphatase 2, mitochondrial	PPA2	38 kDa				1	3	1.39783e+06	1.45961e+07		✓
525	P63220	40S ribosomal protein S21	RPS21	9 kDa				1	3	900071	13341120		✓
526	P17813	Endoglin	ENG	71 kDa		✓		1	3	45394.8	911920		✓
527	Q08830	Fibrinogen-like protein 1	FGL1	36 kDa	✓	✓		1	2	1.22212e+06	3.73684e+07		✓
528	P26373	60S ribosomal protein L13	RPL13	24 kDa				1	2	263434	3331258		✓
529	Q03405	Urokinase plasminogen activator surface receptor	PLAUR	37 kDa		✓		1	2	249741	542002		✓
530	P09382	Galectin-1	LGALS1	15 kDa	✓		✓	1	2	1.44493e+06	2.6985e+06		✓
531	P02654	Apolipoprotein C-I	APOC1	9 kDa	✓	✓		1	2	228098	12378870		✓
532	P05026	Sodium/potassium-transporting ATPase subunit beta-1	ATP1B1	35 kDa			✓	1	2	24527.6	1757918		✓
533	P17096	High mobility group protein HMG-I/HMG-Y	HMGA1	12 kDa				1	2	52303.5	5.5802e+06		✓
534	P13489	Ribonuclease inhibitor	RNH1	50 kDa			✓	1	2	103202	189820		✓
535	Q9HC57	WAP four-disulfide core domain protein 1	WFDC1	24 kDa	✓	✓		1	2	441321	3.10719e+06		✓
536	Q8IUH2	Protein CREG2	CREG2	32 kDa	✓	✓		1	2	55692.1	810062		✓
537	Q6E0U4	Dermokine	DMKN	47 kDa	✓	✓		1	1	579436	3800434		✓
538	Q8NHP1	Aflatoxin B1 aldehyde reductase member 4	AKR7L	37 kDa			✓	1	1	324701	164419		✓
539	O43493	Trans-Golgi network integral membrane protein 2	TGOLN2	46 kDa		✓		1	1	109133	51008.4		✓
540	Q13093	Platelet-activating factor acetylhydrolase	PLA2G7	50 kDa	✓	✓		1	1	78263.1	5833793		✓
541	P29622	Kallistatin	SERPINA4	49 kDa	✓	✓	✓	1	1	6574394	3.44554e+06		✓
542	P08962	CD63 antigen	CD63	26 kDa			✓	1	1	279502	2068576		✓
543	P22732	Solute carrier family 2, facilitated glucose transporter member 5	SLC2A5	55 kDa			✓	1	1	79651	3.90514e+06		✓
544	P13501	C-C motif chemokine 5	CCL5	10 kDa		✓		1	1	686137	12968700		✓
545	P01009	Alpha-1-antitrypsin	SERPINA1	47 kDa	✓	✓	✓	1	1	59173.6	94318.4		✓
546	Q4G148	Glucoside xylosyltransferase 1	GXYLT1	51 kDa				1	1	51616.9	123252		✓
547	P14174	Macrophage migration inhibitory factor	MIF	12 kDa	✓		✓	1	1	697646	1173192		✓
548	P49458	Signal recognition particle 9 kDa protein	SRP9	10 kDa				1	1	91464.3	1.12489e+06		✓
549	Q96DG6	Carboxymethylenebutenolidase homolog	CMBL	28 kDa			✓	1	1	1498011	2.25555e+06		✓
550	P81605	Dermcidin	DCD	11 kDa	✓	✓	✓	1	1	1.06893e+06	1.82702e+06		✓
551	Q9HAV7	GrpE protein homolog 1, mitochondrial	GRPEL1	24 kDa				1	1	15018.9	610536		✓
552	P21815	Bone sialoprotein 2	IBSP	35 kDa	✓	✓		1	1	142897	1.18172e+06		✓
553	P40306	Proteasome subunit beta type-10	PSMB10	29 kDa				1	1	44282.1	1.82464e+06		✓
554	P10124	Serglycin	SRGN	18 kDa		✓		1	1	1.79408e+06	41019560		✓
555	A4FU69	EF-hand calcium-binding domain-containing protein 5	EFCAB5	173 kDa				1	1	142895	2337450		✓
556	P52815	39S ribosomal protein L12, mitochondrial	MRPL12	21 kDa				1	1	20298.9	227443		✓
557	Q01955	Collagen alpha-3(IV) chain	COL4A3	162 kDa	✓	✓		1	1	462607	2.89632e+06		✓
558	Q8N8V2	Guanylate-binding protein 7	GBP7	73 kDa				1	1	102728	1.26838e+06		✓
559	O76070	Gamma-synuclein	SNCG	13 kDa			✓	1	1	101798	160858		✓
560	Q01415	N-acetylgalactosamine kinase	GALK2	50 kDa				1	1	98116.1	1.19793e+06		✓
561	Q9C0D6	FH2 domain-containing protein 1	FHDC1	125 kDa				1	1	127708	2663678		✓
562	P01241	Somatotropin	GH1	25 kDa	✓	✓		1		195046		✓
563	P15151	Poliovirus receptor	PVR	45 kDa		✓		1		633207		✓
564	Q9UHY7	Enolase-phosphatase E1	ENOPH1	29 kDa				1		165975		✓
565	P17900	Ganglioside GM2 activator	GM2A	21 kDa		✓	✓	1		236558		✓
566	P99999	Cytochrome c	CYCS	12 kDa				1		193827		✓
567	Q01459	Di-N-acetylchitobiase	CTBS	44 kDa		✓		1		137251		✓
568	Q9UGM3	Deleted in malignant brain tumors 1 protein	DMBT1	261 kDa	✓	✓	✓	1		393910		✓
569	P04080	Cystatin-B	CSTB	11 kDa			✓	1		488596		✓
570	Q9H3T3	Semaphorin-6B	SEMA6B	95 kDa		✓		1		170869		✓
571	O95498	Vascular non-inflammatory molecule 2	VNN2	59 kDa		✓		1		601149		✓
572	Q8WZ75	Roundabout homolog 4	ROBO4	107 kDa		✓	✓	1		88336.3		✓
573	Q5S007	Leucine-rich repeat serine/threonine-protein kinase 2	LRRK2	286 kDa			✓	1		3.75448e+06		✓
574	Q9UJC5	SH3 domain-binding glutamic acid-rich-like protein 2	SH3BGRL2	12 kDa				1		188107		✓
575	Q6UW88	Epigen	EPGN	17 kDa		✓		1		131567		✓
576	Q8N884	Cyclic GMP-AMP synthase	CGAS	59 kDa				1		1.20764e+07		✓
577	Q9Y5Z9	UbiA prenyltransferase domain-containing protein 1	UBIAD1	37 kDa				1		Missing Value		✓
578	O15204	ADAM DEC1	ADAMDEC1	53 kDa	✓	✓		1		428184		✓
579	A9QM74	Importin subunit alpha-8	KPNA7	57 kDa				1		183421		✓
580	Q8WZ42	Titin	TTN	3816 kDa			✓	1		7.35672e+06		✓
581	P02766	Transthyretin	TTR	16 kDa	✓	✓	✓	1		137403		✓
582	Q6IE36	Ovostatin homolog 2	OVOS2	161 kDa		✓		1		4.24152e+08		✓
583	Q8IVM8	Solute carrier family 22 member 9	SLC22A9	62 kDa				1		269231		✓
584	Q96Q89	Kinesin-like protein KIF20B	KIF20B	211 kDa				1		3.37012e+07		✓
585	P28332	Alcohol dehydrogenase 6	ADH6	39 kDa			✓	1		106440		✓
586	A0A075B6W5	T cell receptor alpha variable 23/delta variable 6	TRAV23DV6	14 kDa				1		8266357		✓
587	Q9UNN8	Endothelial protein C receptor	PROCR	27 kDa		✓	✓	1		322743		✓
588	Q5T0F9	Coiled-coil and C2 domain-containing protein 1B	CC2D1B	94 kDa				1		264719		✓
589	Q9Y3C4	EKC/KEOPS complex subunit TPRKB	TPRKB	20 kDa				1		Missing Value		✓
590	P16083	Ribosyldihydronicotinamide dehydrogenase [quinone]	NQO2	26 kDa			✓	1		279768		✓
591	Q8WTU0	Protein DDI1 homolog 1	DDI1	44 kDa				1		97974.4		✓
592	Q14204	Cytoplasmic dynein 1 heavy chain 1	DYNC1H1	532 kDa			✓		75		935442			✓
593	Q13813	Spectrin alpha chain, non-erythrocytic 1	SPTAN1	285 kDa			✓		74		3.89681e+06			✓
594	O75369	Filamin-B	FLNB	278 kDa			✓		53		1.34048e+07			✓
595	Q01082	Spectrin beta chain, non-erythrocytic 1	SPTBN1	275 kDa			✓		52		1.72859e+06			✓
596	P35579	Myosin-9	MYH9	227 kDa			✓		52		1.09996e+06			✓
597	O43707	Alpha-actinin-4	ACTN4	105 kDa			✓		43		7.31708e+07			✓
598	P12814	Alpha-actinin-1	ACTN1	103 kDa			✓		39		2.15887e+06			✓
599	P35556	Fibrillin-2	FBN2	315 kDa	✓	✓			31		4223250			✓
600	Q14008	Cytoskeleton-associated protein 5	CKAP5	226 kDa					31		200946			✓
601	P23468	Receptor-type tyrosine-protein phosphatase delta	PTPRD	215 kDa		✓	✓		28		5.60224e+07			✓
602	Q92896	Golgi apparatus protein 1	GLG1	135 kDa		✓	✓		25		6578843			✓
603	O14980	Exportin-1	XPO1	123 kDa					25		1.04152e+06			✓
604	P55072	Transitional endoplasmic reticulum ATPase	VCP	89 kDa			✓		23		245472			✓
605	Q16787	Laminin subunit alpha-3	LAMA3	367 kDa	✓	✓	✓		23		1.37519e+07			✓
606	P46013	Proliferation marker protein Ki-67	MKI67	359 kDa					23		1.22547e+07			✓
607	Q96RW7	Hemicentin-1	HMCN1	613 kDa	✓	✓	✓		23		1.95582e+06			✓
608	P34932	Heat shock 70 kDa protein 4	HSPA4	94 kDa			✓		22		6884399			✓
609	Q96QK1	Vacuolar protein sorting-associated protein 35	VPS35	92 kDa			✓		21		1642480			✓
610	Q7KZF4	Staphylococcal nuclease domain-containing protein 1	SND1	102 kDa			✓		20		32257350			✓
611	Q4LDE5	Sushi, von Willebrand factor type A, EGF and pentraxin domain-containing protein 1	SVEP1	390 kDa		✓			20		7.80206e+06			✓
612	P26640	Valine--tRNA ligase	VARS1	140 kDa					20		3.53567e+06			✓
613	O75643	U5 small nuclear ribonucleoprotein 200 kDa helicase	SNRNP200	245 kDa					20		6.17472e+06			✓
614	P35241	Radixin	RDX	69 kDa			✓		19		38063310			✓
615	P49368	T-complex protein 1 subunit gamma	CCT3	61 kDa			✓		19		4.48987e+06			✓
616	O60610	Protein diaphanous homolog 1	DIAPH1	141 kDa					19		2486943			✓
617	P17987	T-complex protein 1 subunit alpha	TCP1	60 kDa			✓		19		8.23498e+06			✓
618	P0C0L5	Complement C4-B	C4B	193 kDa	✓	✓	✓		19		1.14382e+09			✓
619	Q86UP2	Kinectin	KTN1	156 kDa					19		2207753			✓
620	P33992	DNA replication licensing factor MCM5	MCM5	82 kDa					19		9.07223e+06			✓
621	Q10567	AP-1 complex subunit beta-1	AP1B1	105 kDa					19		600265			✓
622	Q12906	Interleukin enhancer-binding factor 3	ILF3	95 kDa					18		5.31294e+06			✓
623	P78371	T-complex protein 1 subunit beta	CCT2	57 kDa			✓		18		7.20274e+06			✓
624	Q9Y4L1	Hypoxia up-regulated protein 1	HYOU1	111 kDa		✓	✓		18		7.4701e+06			✓
625	Q92841	Probable ATP-dependent RNA helicase DDX17	DDX17	80 kDa					18		1.92665e+07			✓
626	Q92598	Heat shock protein 105 kDa	HSPH1	97 kDa			✓		18		8507539			✓
627	Q9BVA1	Tubulin beta-2B chain	TUBB2B	50 kDa					18		324626			✓
628	Q99460	26S proteasome non-ATPase regulatory subunit 1	PSMD1	106 kDa					18		1.33623e+06			✓
629	Q13619	Cullin-4A	CUL4A	88 kDa					18		272509			✓
630	Q96AC1	Fermitin family homolog 2	FERMT2	78 kDa					17		28017690			✓
631	O60763	General vesicular transport factor p115	USO1	108 kDa					17		1.95876e+06			✓
632	P63010	AP-2 complex subunit beta	AP2B1	105 kDa					17		5.89509e+06			✓
633	P53618	Coatomer subunit beta	COPB1	107 kDa					17		139966			✓
634	P51812	Ribosomal protein S6 kinase alpha-3	RPS6KA3	84 kDa					17		17634310			✓
635	Q93063	Exostosin-2	EXT2	82 kDa			✓		17		9.28026e+06			✓
636	Q9NYU2	UDP-glucose:glycoprotein glucosyltransferase 1	UGGT1	177 kDa		✓	✓		17		1.86015e+06			✓
637	P45974	Ubiquitin carboxyl-terminal hydrolase 5	USP5	96 kDa					17		822259			✓
638	Q9Y678	Coatomer subunit gamma-1	COPG1	98 kDa					17		579121			✓
639	P49915	GMP synthase [glutamine-hydrolyzing]	GMPS	77 kDa					17		527618			✓
640	P53621	Coatomer subunit alpha	COPA	138 kDa	✓		✓		17		2.03792e+06			✓
641	P06737	Glycogen phosphorylase, liver form	PYGL	97 kDa			✓		17		511888			✓
642	Q7Z6Z7	E3 ubiquitin-protein ligase HUWE1	HUWE1	482 kDa			✓		17		65026.1			✓
643	Q8WUM4	Programmed cell death 6-interacting protein	PDCD6IP	96 kDa			✓		17		1.26301e+06			✓
644	Q14152	Eukaryotic translation initiation factor 3 subunit A	EIF3A	167 kDa					16		1.37314e+07			✓
645	Q6UXI9	Nephronectin	NPNT	62 kDa	✓	✓	✓		16		9.49324e+06			✓
646	Q92499	ATP-dependent RNA helicase DDX1	DDX1	82 kDa					16		1.64142e+07			✓
647	Q01970	1-phosphatidylinositol 4,5-bisphosphate phosphodiesterase beta-3	PLCB3	139 kDa					16		12178620			✓
648	Q92900	Regulator of nonsense transcripts 1	UPF1	124 kDa					16		8000560			✓
649	O95782	AP-2 complex subunit alpha-1	AP2A1	108 kDa					16		7.87479e+06			✓
650	P14868	Aspartate--tRNA ligase, cytoplasmic	DARS1	57 kDa			✓		16		2084044			✓
651	P11388	DNA topoisomerase 2-alpha	TOP2A	174 kDa					15		7.63069e+06			✓
652	P12956	X-ray repair cross-complementing protein 6	XRCC6	70 kDa					15		21283290			✓
653	P41252	Isoleucine--tRNA ligase, cytoplasmic	IARS1	145 kDa			✓		15		4.15054e+06			✓
654	P47897	Glutamine--tRNA ligase	QARS1	88 kDa					15		3.44719e+06			✓
655	P31150	Rab GDP dissociation inhibitor alpha	GDI1	51 kDa					15		2578117			✓
656	P48444	Coatomer subunit delta	ARCN1	57 kDa					15		1.10126e+06			✓
657	Q9P2J5	Leucine--tRNA ligase, cytoplasmic	LARS1	134 kDa					15		3581208			✓
658	Q9BUF5	Tubulin beta-6 chain	TUBB6	50 kDa			✓		15		827347			✓
659	P05556	Integrin beta-1	ITGB1	88 kDa		✓	✓		15		2512195			✓
660	P50851	Lipopolysaccharide-responsive and beige-like anchor protein	LRBA	319 kDa					15		1.18533e+06			✓
661	P55268	Laminin subunit beta-2	LAMB2	196 kDa	✓	✓	✓		15		2482009			✓
662	P14735	Insulin-degrading enzyme	IDE	118 kDa			✓		15		Missing Value			✓
663	Q04637	Eukaryotic translation initiation factor 4 gamma 1	EIF4G1	175 kDa					15		510821			✓
664	Q13464	Rho-associated protein kinase 1	ROCK1	158 kDa					14		173151			✓
665	Q9NTK5	Obg-like ATPase 1	OLA1	45 kDa			✓		14		2.21962e+06			✓
666	P17844	Probable ATP-dependent RNA helicase DDX5	DDX5	69 kDa			✓		14		1.02293e+07			✓
667	P11216	Glycogen phosphorylase, brain form	PYGB	97 kDa			✓		14		1977398			✓
668	Q99613	Eukaryotic translation initiation factor 3 subunit C	EIF3C	105 kDa					14		7215340			✓
669	O75116	Rho-associated protein kinase 2	ROCK2	161 kDa					14		156183			✓
670	Q14651	Plastin-1	PLS1	70 kDa			✓		14		87529.9			✓
671	Q14203	Dynactin subunit 1	DCTN1	142 kDa					14		1219297			✓
672	O43592	Exportin-T	XPOT	110 kDa					14		705739			✓
673	P33993	DNA replication licensing factor MCM7	MCM7	81 kDa					14		1.12483e+06			✓
674	P16885	1-phosphatidylinositol 4,5-bisphosphate phosphodiesterase gamma-2	PLCG2	148 kDa			✓		14		173594			✓
675	Q14766	Latent-transforming growth factor beta-binding protein 1	LTBP1	187 kDa	✓	✓			14		112348			✓
676	O95980	Reversion-inducing cysteine-rich protein with Kazal motifs	RECK	106 kDa		✓			14		7.7968e+06			✓
677	Q9HCU4	Cadherin EGF LAG seven-pass G-type receptor 2	CELSR2	317 kDa		✓			14		2.85176e+06			✓
678	Q01433	AMP deaminase 2	AMPD2	101 kDa					14		1.1337e+06			✓
679	Q15046	Lysine--tRNA ligase	KARS1	68 kDa					13		4.11515e+06			✓
680	Q13616	Cullin-1	CUL1	90 kDa					13		4.94959e+06			✓
681	P48426	Phosphatidylinositol 5-phosphate 4-kinase type-2 alpha	PIP4K2A	46 kDa					13		2.65705e+07			✓
682	O43390	Heterogeneous nuclear ribonucleoprotein R	HNRNPR	71 kDa					13		1.73924e+07			✓
683	Q8IWV2	Contactin-4	CNTN4	113 kDa		✓			13		1225461			✓
684	Q05707	Collagen alpha-1(XIV) chain	COL14A1	194 kDa	✓	✓			13		4.78013e+06			✓
685	P40763	Signal transducer and activator of transcription 3	STAT3	88 kDa					13		8645139			✓
686	P30566	Adenylosuccinate lyase	ADSL	55 kDa					13		3.93461e+06			✓
687	P14923	Junction plakoglobin	JUP	82 kDa			✓		13		6.01748e+06			✓
688	Q9HCB6	Spondin-1	SPON1	91 kDa	✓	✓			13		9.52055e+06			✓
689	Q9Y4E8	Ubiquitin carboxyl-terminal hydrolase 15	USP15	112 kDa					13		339136			✓
690	P54577	Tyrosine--tRNA ligase, cytoplasmic	YARS1	59 kDa					13		2534558			✓
691	P17812	CTP synthase 1	CTPS1	67 kDa					13		1299301			✓
692	P23921	Ribonucleoside-diphosphate reductase large subunit	RRM1	90 kDa					13		20013.3			✓
693	P54652	Heat shock-related 70 kDa protein 2	HSPA2	70 kDa			✓		13		282394			✓
694	Q9UM47	Neurogenic locus notch homolog protein 3	NOTCH3	244 kDa		✓			13		1.08442e+07			✓
695	Q15075	Early endosome antigen 1	EEA1	162 kDa			✓		13		65855.4			✓
696	Q99832	T-complex protein 1 subunit eta	CCT7	59 kDa			✓		13		1758850			✓
697	P98155	Very low-density lipoprotein receptor	VLDLR	96 kDa		✓			13		610534			✓
698	P08237	ATP-dependent 6-phosphofructokinase, muscle type	PFKM	85 kDa					12		7.16565e+06			✓
699	P22234	Multifunctional protein ADE2	PAICS	47 kDa			✓		12		5906777			✓
700	O94973	AP-2 complex subunit alpha-2	AP2A2	104 kDa					12		541630			✓
701	Q9Y3I0	RNA-splicing ligase RtcB homolog	RTCB	55 kDa					12		2.63422e+07			✓
702	P05023	Sodium/potassium-transporting ATPase subunit alpha-1	ATP1A1	113 kDa			✓		12		1.88228e+07			✓
703	P50991	T-complex protein 1 subunit delta	CCT4	58 kDa			✓		12		6.81243e+06			✓
704	P02452	Collagen alpha-1(I) chain	COL1A1	139 kDa	✓	✓			12		9.43515e+06			✓
705	O60506	Heterogeneous nuclear ribonucleoprotein Q	SYNCRIP	70 kDa					12		21038590			✓
706	P29144	Tripeptidyl-peptidase 2	TPP2	138 kDa					12		6856968			✓
707	Q93034	Cullin-5	CUL5	91 kDa					12		6.52306e+06			✓
708	P12270	Nucleoprotein TPR	TPR	267 kDa					12		3.28027e+06			✓
709	P62136	Serine/threonine-protein phosphatase PP1-alpha catalytic subunit	PPP1CA	38 kDa			✓		12		5.45964e+06			✓
710	P54920	Alpha-soluble NSF attachment protein	NAPA	33 kDa			✓		12		212728			✓
711	Q58EX2	Protein sidekick-2	SDK2	239 kDa		✓			12		125876			✓
712	P08253	72 kDa type IV collagenase	MMP2	74 kDa	✓	✓			12		9.16957e+06			✓
713	P30622	CAP-Gly domain-containing linker protein 1	CLIP1	162 kDa					12		63006.2			✓
714	P62191	26S proteasome regulatory subunit 4	PSMC1	49 kDa					11		2.43217e+07			✓
715	P61201	COP9 signalosome complex subunit 2	COPS2	52 kDa					11		1.48661e+07			✓
716	P62140	Serine/threonine-protein phosphatase PP1-beta catalytic subunit	PPP1CB	37 kDa			✓		11		1.22986e+07			✓
717	O95834	Echinoderm microtubule-associated protein-like 2	EML2	71 kDa					11		830061			✓
718	P27816	Microtubule-associated protein 4	MAP4	121 kDa					11		5374842			✓
719	Q6ZMP0	Thrombospondin type-1 domain-containing protein 4	THSD4	112 kDa		✓	✓		11		4.63548e+06			✓
720	P49321	Nuclear autoantigenic sperm protein	NASP	85 kDa					11		1.28855e+07			✓
721	Q14C86	GTPase-activating protein and VPS9 domain-containing protein 1	GAPVD1	165 kDa					11		1.00131e+07			✓
722	O75718	Cartilage-associated protein	CRTAP	47 kDa	✓	✓			11		2.0166e+07			✓
723	Q15029	116 kDa U5 small nuclear ribonucleoprotein component	EFTUD2	109 kDa					11		8.64784e+06			✓
724	P46060	Ran GTPase-activating protein 1	RANGAP1	64 kDa					11		3.17642e+06			✓
725	P12081	Histidine--tRNA ligase, cytoplasmic	HARS1	57 kDa					11		1.18634e+06			✓
726	P36873	Serine/threonine-protein phosphatase PP1-gamma catalytic subunit	PPP1CC	37 kDa					11		2.57776e+06			✓
727	Q16222	UDP-N-acetylhexosamine pyrophosphorylase	UAP1	59 kDa					11		264090			✓
728	Q9Y265	RuvB-like 1	RUVBL1	50 kDa			✓		11		445972			✓
729	Q8TAT6	Nuclear protein localization protein 4 homolog	NPLOC4	68 kDa					11		3921252			✓
730	P28838	Cytosol aminopeptidase	LAP3	56 kDa			✓		11		782876			✓
731	Q96AE4	Far upstream element-binding protein 1	FUBP1	68 kDa					10		1.15783e+07			✓
732	P27708	CAD protein	CAD	243 kDa			✓		10		178158			✓
733	O43242	26S proteasome non-ATPase regulatory subunit 3	PSMD3	61 kDa			✓		10		495886			✓
734	Q8IXL6	Extracellular serine/threonine protein kinase FAM20C	FAM20C	66 kDa	✓	✓	✓		10		2.25133e+06			✓
735	Q92743	Serine protease HTRA1	HTRA1	51 kDa	✓	✓	✓		10		3.87017e+07			✓
736	Q9UKM7	Endoplasmic reticulum mannosyl-oligosaccharide 1,2-alpha-mannosidase	MAN1B1	80 kDa					10		1.18782e+06			✓
737	P00451	Coagulation factor VIII	F8	267 kDa	✓	✓			10		1.01027e+06			✓
738	Q96TA1	Protein Niban 2	NIBAN2	84 kDa			✓		10		2186624			✓
739	P12268	Inosine-5'-monophosphate dehydrogenase 2	IMPDH2	56 kDa			✓		10		520898			✓
740	Q8NE71	ATP-binding cassette sub-family F member 1	ABCF1	96 kDa					10		6.25489e+06			✓
741	O75153	Clustered mitochondria protein homolog	CLUH	147 kDa					10		53303.1			✓
742	P08123	Collagen alpha-2(I) chain	COL1A2	129 kDa	✓	✓	✓		10		2.28073e+06			✓
743	Q9BS26	Endoplasmic reticulum resident protein 44	ERP44	47 kDa		✓	✓		10		1.75994e+06			✓
744	O95433	Activator of 90 kDa heat shock protein ATPase homolog 1	AHSA1	38 kDa			✓		10		3193113			✓
745	O15067	Phosphoribosylformylglycinamidine synthase	PFAS	145 kDa			✓		10		211526			✓
746	Q9Y230	RuvB-like 2	RUVBL2	51 kDa			✓		10		747350			✓
747	Q96P70	Importin-9	IPO9	116 kDa					10		6.73535e+06			✓
748	O60271	C-Jun-amino-terminal kinase-interacting protein 4	SPAG9	146 kDa			✓		10		300115			✓
749	P33991	DNA replication licensing factor MCM4	MCM4	97 kDa					10		8338328			✓
750	P23528	Cofilin-1	CFL1	19 kDa			✓		10		8981896			✓
751	O43847	Nardilysin	NRDC	132 kDa		✓			10		5350420			✓
752	P05198	Eukaryotic translation initiation factor 2 subunit 1	EIF2S1	36 kDa			✓		10		2247937			✓
753	P08133	Annexin A6	ANXA6	76 kDa			✓		10		1.35318e+06			✓
754	Q9UGI8	Testin	TES	48 kDa					10		534290			✓
755	Q13576	Ras GTPase-activating-like protein IQGAP2	IQGAP2	181 kDa			✓		10		169661			✓
756	O14744	Protein arginine N-methyltransferase 5	PRMT5	73 kDa					10		257004			✓
757	Q9P2E9	Ribosome-binding protein 1	RRBP1	152 kDa					10		459855			✓
758	Q9NYQ8	Protocadherin Fat 2	FAT2	479 kDa		✓	✓		10		Missing Value			✓
759	Q16576	Histone-binding protein RBBP7	RBBP7	48 kDa					9		3.21159e+06			✓
760	O15371	Eukaryotic translation initiation factor 3 subunit D	EIF3D	64 kDa					9		10831284			✓
761	Q9Y5L0	Transportin-3	TNPO3	104 kDa					9		4457066			✓
762	Q15459	Splicing factor 3A subunit 1	SF3A1	89 kDa					9		9.25075e+06			✓
763	P53041	Serine/threonine-protein phosphatase 5	PPP5C	57 kDa					9		1.22836e+07			✓
764	Q8NBS9	Thioredoxin domain-containing protein 5	TXNDC5	48 kDa		✓	✓		9		3.77408e+06			✓
765	Q24JP5	Transmembrane protein 132A	TMEM132A	110 kDa		✓	✓		9		1.16361e+07			✓
766	Q02153	Guanylate cyclase soluble subunit beta-1	GUCY1B1	71 kDa					9		7964439			✓
767	P20936	Ras GTPase-activating protein 1	RASA1	116 kDa					9		5.61875e+06			✓
768	Q14839	Chromodomain-helicase-DNA-binding protein 4	CHD4	218 kDa					9		1395211			✓
769	P31153	S-adenosylmethionine synthase isoform type-2	MAT2A	44 kDa					9		23251200			✓
770	O00303	Eukaryotic translation initiation factor 3 subunit F	EIF3F	38 kDa					9		1.8213e+07			✓
771	P25205	DNA replication licensing factor MCM3	MCM3	91 kDa					9		5.64109e+06			✓
772	Q9UBB4	Ataxin-10	ATXN10	53 kDa					9		1.54565e+06			✓
773	Q9H2G2	STE20-like serine/threonine-protein kinase	SLK	143 kDa			✓		9		285500			✓
774	Q14568	Heat shock protein HSP 90-alpha A2	HSP90AA2P	39 kDa			✓		9		29462280			✓
775	P13010	X-ray repair cross-complementing protein 5	XRCC5	83 kDa					9		1.05433e+07			✓
776	P49189	4-trimethylaminobutyraldehyde dehydrogenase	ALDH9A1	54 kDa			✓		9		2.30054e+06			✓
777	O60841	Eukaryotic translation initiation factor 5B	EIF5B	139 kDa					9		2.47101e+06			✓
778	Q05682	Caldesmon	CALD1	93 kDa					9		1316779			✓
779	Q14703	Membrane-bound transcription factor site-1 protease	MBTPS1	118 kDa		✓			9		2.28049e+06			✓
780	P16112	Aggrecan core protein	ACAN	261 kDa	✓	✓			9		369737			✓
781	O00754	Lysosomal alpha-mannosidase	MAN2B1	114 kDa		✓	✓		9		1.39986e+06			✓
782	Q9NSD9	Phenylalanine--tRNA ligase beta subunit	FARSB	66 kDa					9		1.58818e+06			✓
783	Q7LDG7	RAS guanyl-releasing protein 2	RASGRP2	69 kDa					9		353139			✓
784	O95757	Heat shock 70 kDa protein 4L	HSPA4L	95 kDa					9		2700911			✓
785	O15031	Plexin-B2	PLXNB2	205 kDa		✓	✓		9		264882			✓
786	P54578	Ubiquitin carboxyl-terminal hydrolase 14	USP14	56 kDa			✓		9		1.03623e+06			✓
787	P52306	Rap1 GTPase-GDP dissociation stimulator 1	RAP1GDS1	66 kDa			✓		9		1213928			✓
788	Q13045	Protein flightless-1 homolog	FLII	145 kDa					9		78681.2			✓
789	Q7L5N1	COP9 signalosome complex subunit 6	COPS6	36 kDa					8		956748			✓
790	P05121	Plasminogen activator inhibitor 1	SERPINE1	45 kDa	✓	✓	✓		8		7057925			✓
791	Q9HB71	Calcyclin-binding protein	CACYBP	26 kDa			✓		8		64822210			✓
792	Q01105	Protein SET	SET	33 kDa					8		1512116			✓
793	Q13283	Ras GTPase-activating protein-binding protein 1	G3BP1	52 kDa					8		1.43726e+07			✓
794	P31689	DnaJ homolog subfamily A member 1	DNAJA1	45 kDa			✓		8		697195			✓
795	P31947	14-3-3 protein sigma	SFN	28 kDa	✓		✓		8		9.38643e+06			✓
796	Q06033	Inter-alpha-trypsin inhibitor heavy chain H3	ITIH3	100 kDa	✓	✓	✓		8		343676			✓
797	Q9Y266	Nuclear migration protein nudC	NUDC	38 kDa					8		2725249			✓
798	P29122	Proprotein convertase subtilisin/kexin type 6	PCSK6	106 kDa	✓	✓			8		2.51416e+06			✓
799	Q9P258	Protein RCC2	RCC2	56 kDa					8		10060558			✓
800	Q8IYD1	Eukaryotic peptide chain release factor GTP-binding subunit ERF3B	GSPT2	69 kDa					8		358745			✓
801	O43765	Small glutamine-rich tetratricopeptide repeat-containing protein alpha	SGTA	34 kDa					8		1.3811e+06			✓
802	P08865	40S ribosomal protein SA	RPSA	33 kDa			✓		8		4.21785e+07			✓
803	P13798	Acylamino-acid-releasing enzyme	APEH	81 kDa			✓		8		1.70202e+06			✓
804	O00567	Nucleolar protein 56	NOP56	66 kDa					8		3.95133e+06			✓
805	P48723	Heat shock 70 kDa protein 13	HSPA13	52 kDa		✓	✓		8		1.51544e+06			✓
806	P50995	Annexin A11	ANXA11	54 kDa			✓		8		3.5916e+06			✓
807	P22102	Trifunctional purine biosynthetic protein adenosine-3	GART	108 kDa			✓		8		1.36325e+06			✓
808	O95340	Bifunctional 3'-phosphoadenosine 5'-phosphosulfate synthase 2	PAPSS2	70 kDa					8		1.03923e+06			✓
809	P46087	Probable 28S rRNA (cytosine(4447)-C(5))-methyltransferase	NOP2	89 kDa					8		5.82305e+06			✓
810	Q9Y570	Protein phosphatase methylesterase 1	PPME1	42 kDa					8		153045			✓
811	P04899	Guanine nucleotide-binding protein G(i) subunit alpha-2	GNAI2	40 kDa			✓		8		579026			✓
812	Q9UHX1	Poly(U)-binding-splicing factor PUF60	PUF60	60 kDa					8		7.72617e+06			✓
813	P05783	Keratin, type I cytoskeletal 18	KRT18	48 kDa			✓		8		5405808			✓
814	O60245	Protocadherin-7	PCDH7	116 kDa		✓			8		906690			✓
815	Q86SR1	Polypeptide N-acetylgalactosaminyltransferase 10	GALNT10	69 kDa					8		1.49814e+06			✓
816	Q14980	Nuclear mitotic apparatus protein 1	NUMA1	238 kDa			✓		8		1905436			✓
817	Q06323	Proteasome activator complex subunit 1	PSME1	29 kDa			✓		8		45160.8			✓
818	Q9UNF0	Protein kinase C and casein kinase substrate in neurons protein 2	PACSIN2	56 kDa			✓		8		2.07684e+06			✓
819	P34896	Serine hydroxymethyltransferase, cytosolic	SHMT1	53 kDa			✓		8		550647			✓
820	P46926	Glucosamine-6-phosphate isomerase 1	GNPDA1	33 kDa			✓		8		1.38185e+06			✓
821	Q15181	Inorganic pyrophosphatase	PPA1	33 kDa			✓		8		2.52929e+06			✓
822	Q15057	Arf-GAP with coiled-coil, ANK repeat and PH domain-containing protein 2	ACAP2	88 kDa					8		1.60521e+06			✓
823	O75688	Protein phosphatase 1B	PPM1B	53 kDa					8		165431			✓
824	Q00839	Heterogeneous nuclear ribonucleoprotein U	HNRNPU	91 kDa					8		626217			✓
825	Q9HAV4	Exportin-5	XPO5	136 kDa					8		475874			✓
826	P47755	F-actin-capping protein subunit alpha-2	CAPZA2	33 kDa			✓		8		2450348			✓
827	P47712	Cytosolic phospholipase A2	PLA2G4A	85 kDa					8		763775			✓
828	O15372	Eukaryotic translation initiation factor 3 subunit H	EIF3H	40 kDa			✓		8		2.8395e+06			✓
829	P58107	Epiplakin	EPPK1	556 kDa					8		66552.9			✓
830	Q9Y6Y8	SEC23-interacting protein	SEC23IP	111 kDa					8		325892			✓
831	Q15019	Septin-2	SEPTIN2	41 kDa			✓		7		4.10041e+06			✓
832	P48745	CCN family member 3	CCN3	39 kDa	✓	✓			7		9295249			✓
833	P49257	Protein ERGIC-53	LMAN1	58 kDa		✓	✓		7		30119160			✓
834	P00742	Coagulation factor X	F10	55 kDa	✓	✓			7		1655864			✓
835	O75976	Carboxypeptidase D	CPD	153 kDa		✓	✓		7		1.5571e+06			✓
836	P39687	Acidic leucine-rich nuclear phosphoprotein 32 family member A	ANP32A	29 kDa					7		2.08477e+07			✓
837	Q92696	Geranylgeranyl transferase type-2 subunit alpha	RABGGTA	65 kDa					7		1199660			✓
838	Q04917	14-3-3 protein eta	YWHAH	28 kDa			✓		7		5.87512e+07			✓
839	Q09028	Histone-binding protein RBBP4	RBBP4	48 kDa					7		1.11311e+07			✓
840	P27824	Calnexin	CANX	68 kDa		✓	✓		7		3364070			✓
841	P21810	Biglycan	BGN	42 kDa	✓	✓	✓		7		35588680			✓
842	Q9UMS4	Pre-mRNA-processing factor 19	PRPF19	55 kDa					7		8.369e+06			✓
843	Q13263	Transcription intermediary factor 1-beta	TRIM28	89 kDa					7		6.20962e+06			✓
844	Q9H497	Torsin-3A	TOR3A	46 kDa		✓	✓		7		4.30478e+06			✓
845	P06493	Cyclin-dependent kinase 1	CDK1	34 kDa			✓		7		2.21893e+06			✓
846	P63151	Serine/threonine-protein phosphatase 2A 55 kDa regulatory subunit B alpha isoform	PPP2R2A	52 kDa					7		1.45564e+07			✓
847	Q99598	Translin-associated protein X	TSNAX	33 kDa					7		1368118			✓
848	Q12931	Heat shock protein 75 kDa, mitochondrial	TRAP1	80 kDa					7		1.20744e+06			✓
849	O00461	Golgi integral membrane protein 4	GOLIM4	82 kDa					7		1565703			✓
850	P43146	Netrin receptor DCC	DCC	158 kDa		✓			7		6.72093e+06			✓
851	P11387	DNA topoisomerase 1	TOP1	91 kDa					7		2.16067e+06			✓
852	P98088	Mucin-5AC	MUC5AC	586 kDa	✓	✓	✓		7		2.24566e+06			✓
853	P28074	Proteasome subunit beta type-5	PSMB5	28 kDa			✓		7		601978			✓
854	P27105	Erythrocyte band 7 integral membrane protein	STOM	32 kDa			✓		7		54604.8			✓
855	Q08J23	RNA cytosine C(5)-methyltransferase NSUN2	NSUN2	86 kDa			✓		7		3.17176e+06			✓
856	P46531	Neurogenic locus notch homolog protein 1	NOTCH1	272 kDa		✓			7		2.07524e+06			✓
857	P17655	Calpain-2 catalytic subunit	CAPN2	80 kDa			✓		7		1.19562e+06			✓
858	P50502	Hsc70-interacting protein	ST13	41 kDa			✓		7		479082			✓
859	P46777	60S ribosomal protein L5	RPL5	34 kDa			✓		7		3225185			✓
860	Q99733	Nucleosome assembly protein 1-like 4	NAP1L4	43 kDa					7		1716625			✓
861	Q86TU7	Actin-histidine N-methyltransferase	SETD3	67 kDa					7		3.10352e+06			✓
862	Q9GZP4	PITH domain-containing protein 1	PITHD1	24 kDa					7		Missing Value			✓
863	Q6FI81	Anamorsin	CIAPIN1	34 kDa					7		1.55485e+06			✓
864	O60264	SWI/SNF-related matrix-associated actin-dependent regulator of chromatin subfamily A member 5	SMARCA5	122 kDa					7		1770621			✓
865	Q6UX71	Plexin domain-containing protein 2	PLXDC2	60 kDa		✓			7		379430			✓
866	Q15758	Neutral amino acid transporter B(0)	SLC1A5	57 kDa			✓		7		2.60891e+06			✓
867	Q9UH65	Switch-associated protein 70	SWAP70	69 kDa					7		892759			✓
868	P13861	cAMP-dependent protein kinase type II-alpha regulatory subunit	PRKAR2A	46 kDa			✓		7		272004			✓
869	P49419	Alpha-aminoadipic semialdehyde dehydrogenase	ALDH7A1	58 kDa			✓		7		252122			✓
870	P22455	Fibroblast growth factor receptor 4	FGFR4	88 kDa		✓			7		1.37407e+06			✓
871	P23193	Transcription elongation factor A protein 1	TCEA1	34 kDa					7		161797			✓
872	Q12904	Aminoacyl tRNA synthase complex-interacting multifunctional protein 1	AIMP1	34 kDa	✓				7		2.23999e+06			✓
873	O60343	TBC1 domain family member 4	TBC1D4	147 kDa					7		191009			✓
874	Q86SF2	N-acetylgalactosaminyltransferase 7	GALNT7	75 kDa			✓		7		1.4091e+06			✓
875	O00148	ATP-dependent RNA helicase DDX39A	DDX39A	49 kDa					7		787479			✓
876	Q15435	Protein phosphatase 1 regulatory subunit 7	PPP1R7	42 kDa			✓		7		297381			✓
877	Q13564	NEDD8-activating enzyme E1 regulatory subunit	NAE1	60 kDa					7		220420			✓
878	Q76M96	Coiled-coil domain-containing protein 80	CCDC80	108 kDa	✓	✓			7		745844			✓
879	Q15404	Ras suppressor protein 1	RSU1	32 kDa			✓		7		87157.3			✓
880	O14964	Hepatocyte growth factor-regulated tyrosine kinase substrate	HGS	86 kDa			✓		7		201080			✓
881	O43681	ATPase GET3	GET3	39 kDa			✓		6		1.9768e+07			✓
882	P35613	Basigin	BSG	42 kDa		✓	✓		6		1.4083e+07			✓
883	Q00688	Peptidyl-prolyl cis-trans isomerase FKBP3	FKBP3	25 kDa					6		7554971			✓
884	Q13162	Peroxiredoxin-4	PRDX4	31 kDa		✓	✓		6		2245550			✓
885	Q02878	60S ribosomal protein L6	RPL6	33 kDa					6		1.63027e+06			✓
886	P22694	cAMP-dependent protein kinase catalytic subunit beta	PRKACB	41 kDa			✓		6		8.08913e+06			✓
887	Q13867	Bleomycin hydrolase	BLMH	53 kDa			✓		6		5.09825e+06			✓
888	Q969P0	Immunoglobulin superfamily member 8	IGSF8	65 kDa		✓	✓		6		4.24721e+06			✓
889	Q9H0B8	Cysteine-rich secretory protein LCCL domain-containing 2	CRISPLD2	56 kDa	✓	✓	✓		6		1.09789e+06			✓
890	Q14166	Tubulin--tyrosine ligase-like protein 12	TTLL12	74 kDa					6		3.20478e+06			✓
891	Q9H1B5	Xylosyltransferase 2	XYLT2	97 kDa	✓				6		2.36704e+06			✓
892	Q06203	Amidophosphoribosyltransferase	PPAT	57 kDa					6		525587			✓
893	P20810	Calpastatin	CAST	77 kDa					6		1541775			✓
894	Q12792	Twinfilin-1	TWF1	40 kDa					6		1907758			✓
895	Q6P988	Palmitoleoyl-protein carboxylesterase NOTUM	NOTUM	56 kDa	✓	✓			6		6.19162e+06			✓
896	Q16762	Thiosulfate sulfurtransferase	TST	33 kDa					6		3.61144e+06			✓
897	P56199	Integrin alpha-1	ITGA1	131 kDa		✓	✓		6		2.60409e+06			✓
898	P25786	Proteasome subunit alpha type-1	PSMA1	30 kDa			✓		6		2689128			✓
899	Q9UN86	Ras GTPase-activating protein-binding protein 2	G3BP2	54 kDa					6		2578082			✓
900	P12110	Collagen alpha-2(VI) chain	COL6A2	109 kDa	✓	✓	✓		6		2.05781e+06			✓
901	O43813	Glutathione S-transferase LANCL1	LANCL1	45 kDa					6		632797			✓
902	O15355	Protein phosphatase 1G	PPM1G	59 kDa					6		3.68494e+06			✓
903	Q7Z2W4	Zinc finger CCCH-type antiviral protein 1	ZC3HAV1	101 kDa					6		3.61067e+06			✓
904	Q9Y2W1	Thyroid hormone receptor-associated protein 3	THRAP3	109 kDa			✓		6		2622261			✓
905	O14745	Na(+)/H(+) exchange regulatory cofactor NHE-RF1	SLC9A3R1	39 kDa			✓		6		2.93048e+06			✓
906	Q13219	Pappalysin-1	PAPPA	181 kDa	✓	✓			6		3381790			✓
907	P30154	Serine/threonine-protein phosphatase 2A 65 kDa regulatory subunit A beta isoform	PPP2R1B	66 kDa			✓		6		917883			✓
908	P15848	Arylsulfatase B	ARSB	60 kDa		✓	✓		6		3.87529e+06			✓
909	Q01581	Hydroxymethylglutaryl-CoA synthase, cytoplasmic	HMGCS1	57 kDa					6		116859			✓
910	Q99536	Synaptic vesicle membrane protein VAT-1 homolog	VAT1	42 kDa			✓		6		393585			✓
911	Q9NRB3	Carbohydrate sulfotransferase 12	CHST12	48 kDa					6		949990			✓
912	Q9UBS4	DnaJ homolog subfamily B member 11	DNAJB11	41 kDa		✓			6		8.20494e+06			✓
913	Q9BXP5	Serrate RNA effector molecule homolog	SRRT	101 kDa					6		2237564			✓
914	Q9UHB9	Signal recognition particle subunit SRP68	SRP68	71 kDa					6		1957817			✓
915	Q15942	Zyxin	ZYX	61 kDa					6		1571939			✓
916	Q66K79	Carboxypeptidase Z	CPZ	74 kDa	✓	✓			6		3.39713e+06			✓
917	P25705	ATP synthase subunit alpha, mitochondrial	ATP5F1A	60 kDa			✓		6		5.25801e+06			✓
918	P46063	ATP-dependent DNA helicase Q1	RECQL	73 kDa					6		2809250			✓
919	Q9BQA1	Methylosome protein 50	WDR77	37 kDa					6		1.29886e+06			✓
920	Q8NI99	Angiopoietin-related protein 6	ANGPTL6	52 kDa	✓	✓	✓		6		450805			✓
921	Q9NR46	Endophilin-B2	SH3GLB2	44 kDa					6		315231			✓
922	Q8TD16	Protein bicaudal D homolog 2	BICD2	94 kDa					6		2.22507e+06			✓
923	Q9Y251	Heparanase	HPSE	61 kDa	✓	✓			6		3.64896e+06			✓
924	O95428	Papilin	PAPLN	138 kDa	✓	✓			6		2346650			✓
925	P49354	Protein farnesyltransferase/geranylgeranyltransferase type-1 subunit alpha	FNTA	44 kDa					6		47703.3			✓
926	O76094	Signal recognition particle subunit SRP72	SRP72	75 kDa					6		184793			✓
927	P42704	Leucine-rich PPR motif-containing protein, mitochondrial	LRPPRC	158 kDa					6		655135			✓
928	Q9NYU1	UDP-glucose:glycoprotein glucosyltransferase 2	UGGT2	175 kDa		✓			6		899926			✓
929	Q9NSE4	Isoleucine--tRNA ligase, mitochondrial	IARS2	114 kDa					6		734628			✓
930	P52597	Heterogeneous nuclear ribonucleoprotein F	HNRNPF	46 kDa					6		681275			✓
931	Q9H3P7	Golgi resident protein GCP60	ACBD3	61 kDa					6		161522			✓
932	Q5QJ74	Tubulin-specific chaperone cofactor E-like protein	TBCEL	48 kDa					6		3.92155e+06			✓
933	Q99747	Gamma-soluble NSF attachment protein	NAPG	35 kDa			✓		6		1.43496e+06			✓
934	O96019	Actin-like protein 6A	ACTL6A	47 kDa					6		994047			✓
935	Q13201	Multimerin-1	MMRN1	138 kDa	✓	✓			6		5.6725e+06			✓
936	Q7LGC8	Carbohydrate sulfotransferase 3	CHST3	55 kDa					6		1.36266e+06			✓
937	Q99798	Aconitate hydratase, mitochondrial	ACO2	85 kDa					6		270872			✓
938	P43243	Matrin-3	MATR3	95 kDa					6		4.47028e+06			✓
939	Q06278	Aldehyde oxidase	AOX1	148 kDa			✓		6		9385517			✓
940	P49589	Cysteine--tRNA ligase, cytoplasmic	CARS1	85 kDa					6		1.2555e+06			✓
941	Q8TEU8	WAP, Kazal, immunoglobulin, Kunitz and NTR domain-containing protein 2	WFIKKN2	64 kDa	✓	✓			6		833355			✓
942	Q8WXX5	DnaJ homolog subfamily C member 9	DNAJC9	30 kDa					6		1.07161e+06			✓
943	Q9Y5G8	Protocadherin gamma-A5	PCDHGA5	101 kDa		✓			6		1.62295e+06			✓
944	P06858	Lipoprotein lipase	LPL	53 kDa	✓	✓			6		86528.1			✓
945	Q9UKD2	mRNA turnover protein 4 homolog	MRTO4	28 kDa					6		4769594			✓
946	P50552	Vasodilator-stimulated phosphoprotein	VASP	40 kDa			✓		6		373917			✓
947	Q15389	Angiopoietin-1	ANGPT1	58 kDa	✓	✓	✓		6		742714			✓
948	Q12797	Aspartyl/asparaginyl beta-hydroxylase	ASPH	86 kDa					6		433355			✓
949	Q9NRW7	Vacuolar protein sorting-associated protein 45	VPS45	65 kDa					6		118228			✓
950	Q86UE4	Protein LYRIC	MTDH	64 kDa					6		2783022			✓
951	Q8IV38	Ankyrin repeat and MYND domain-containing protein 2	ANKMY2	49 kDa					6		742328			✓
952	P19827	Inter-alpha-trypsin inhibitor heavy chain H1	ITIH1	101 kDa	✓	✓	✓		6		437490			✓
953	Q9NZL4	Hsp70-binding protein 1	HSPBP1	39 kDa					6		414352			✓
954	Q9UNZ2	NSFL1 cofactor p47	NSFL1C	41 kDa					6		198560			✓
955	Q9NUU7	ATP-dependent RNA helicase DDX19A	DDX19A	54 kDa					6		171260			✓
956	O43237	Cytoplasmic dynein 1 light intermediate chain 2	DYNC1LI2	54 kDa					6		748384			✓
957	Q96C19	EF-hand domain-containing protein D2	EFHD2	27 kDa					6		1.25325e+06			✓
958	Q4G0N4	NAD kinase 2, mitochondrial	NADK2	49 kDa					6		64727.6			✓
959	P41091	Eukaryotic translation initiation factor 2 subunit 3	EIF2S3	51 kDa			✓		6		2.84203e+06			✓
960	O14579	Coatomer subunit epsilon	COPE	34 kDa					5		2.48128e+06			✓
961	Q15691	Microtubule-associated protein RP/EB family member 1	MAPRE1	30 kDa					5		154535			✓
962	Q9BXJ4	Complement C1q tumor necrosis factor-related protein 3	C1QTNF3	27 kDa	✓	✓	✓		5		2.49393e+07			✓
963	Q8NBZ7	UDP-glucuronic acid decarboxylase 1	UXS1	48 kDa			✓		5		5081161			✓
964	Q8WUA8	Tsukushin	TSKU	38 kDa	✓	✓			5		6.44013e+06			✓
965	O75351	Vacuolar protein sorting-associated protein 4B	VPS4B	49 kDa			✓		5		188988			✓
966	O75752	UDP-GalNAc:beta-1,3-N-acetylgalactosaminyltransferase 1	B3GALNT1	40 kDa					5		4.30519e+06			✓
967	Q6FHJ7	Secreted frizzled-related protein 4	SFRP4	40 kDa	✓	✓			5		13240090			✓
968	A1L4H1	Soluble scavenger receptor cysteine-rich domain-containing protein SSC5D	SSC5D	166 kDa	✓				5		100674			✓
969	P10321	HLA class I histocompatibility antigen, C alpha chain	HLA-C	41 kDa		✓	✓		5		1602801			✓
970	P01889	HLA class I histocompatibility antigen, B alpha chain	HLA-B	40 kDa		✓	✓		5		15821730			✓
971	Q9BUP3	Oxidoreductase HTATIP2	HTATIP2	27 kDa					5		5.56277e+06			✓
972	Q9NQG5	Regulation of nuclear pre-mRNA domain-containing protein 1B	RPRD1B	37 kDa					5		1.84232e+06			✓
973	Q9Y2Z0	Protein SGT1 homolog	SUGT1	41 kDa					5		1.20012e+06			✓
974	Q9UJU6	Drebrin-like protein	DBNL	48 kDa			✓		5		519598			✓
975	Q9UBQ5	Eukaryotic translation initiation factor 3 subunit K	EIF3K	25 kDa					5		5395121			✓
976	P53004	Biliverdin reductase A	BLVRA	33 kDa			✓		5		3.17042e+06			✓
977	P19338	Nucleolin	NCL	77 kDa			✓		5		4.45641e+07			✓
978	P49748	Very long-chain specific acyl-CoA dehydrogenase, mitochondrial	ACADVL	70 kDa					5		2.78603e+06			✓
979	Q96AG4	Leucine-rich repeat-containing protein 59	LRRC59	35 kDa					5		4.95731e+06			✓
980	Q13409	Cytoplasmic dynein 1 intermediate chain 2	DYNC1I2	71 kDa					5		6.14197e+06			✓
981	Q07157	Tight junction protein ZO-1	TJP1	195 kDa					5		1.11503e+06			✓
982	Q13438	Protein OS-9	OS9	76 kDa		✓			5		816158			✓
983	Q9UPY8	Microtubule-associated protein RP/EB family member 3	MAPRE3	32 kDa					5		3.93685e+06			✓
984	Q9UNQ0	Broad substrate specificity ATP-binding cassette transporter ABCG2	ABCG2	72 kDa					5		662883			✓
985	P08236	Beta-glucuronidase	GUSB	75 kDa		✓	✓		5		1.74024e+06			✓
986	P30520	Adenylosuccinate synthetase isozyme 2	ADSS2	50 kDa			✓		5		2.00213e+06			✓
987	O75367	Core histone macro-H2A.1	MACROH2A1	40 kDa			✓		5		2492254			✓
988	P29992	Guanine nucleotide-binding protein subunit alpha-11	GNA11	42 kDa			✓		5		4.18747e+06			✓
989	P13716	Delta-aminolevulinic acid dehydratase	ALAD	36 kDa			✓		5		1.28963e+06			✓
990	Q9UKS6	Protein kinase C and casein kinase substrate in neurons protein 3	PACSIN3	48 kDa			✓		5		729551			✓
991	O75095	Multiple epidermal growth factor-like domains protein 6	MEGF6	161 kDa	✓	✓			5		1.56291e+06			✓
992	Q07960	Rho GTPase-activating protein 1	ARHGAP1	50 kDa			✓		5		160109			✓
993	Q9NZL9	Methionine adenosyltransferase 2 subunit beta	MAT2B	38 kDa			✓		5		570957			✓
994	P48507	Glutamate--cysteine ligase regulatory subunit	GCLM	31 kDa					5		607500			✓
995	O60330	Protocadherin gamma-A12	PCDHGA12	101 kDa		✓			5		3119250			✓
996	P56192	Methionine--tRNA ligase, cytoplasmic	MARS1	101 kDa			✓		5		2.83906e+06			✓
997	Q14694	Ubiquitin carboxyl-terminal hydrolase 10	USP10	87 kDa					5		1.98896e+06			✓
998	Q96DI7	U5 small nuclear ribonucleoprotein 40 kDa protein	SNRNP40	39 kDa					5		3.23789e+06			✓
999	Q8N543	Prolyl 3-hydroxylase OGFOD1	OGFOD1	63 kDa					5		2435118			✓
1000	Q9BV20	Methylthioribose-1-phosphate isomerase	MRI1	39 kDa					5		805925			✓
1001	Q8WX93	Palladin	PALLD	151 kDa					5		1554654			✓
1002	Q13868	Exosome complex component RRP4	EXOSC2	33 kDa					5		1.97431e+06			✓
1003	P49788	Retinoic acid receptor responder protein 1	RARRES1	33 kDa			✓		5		4.87359e+06			✓
1004	P27694	Replication protein A 70 kDa DNA-binding subunit	RPA1	68 kDa					5		3.5764e+06			✓
1005	P48163	NADP-dependent malic enzyme	ME1	64 kDa					5		376324			✓
1006	Q15293	Reticulocalbin-1	RCN1	39 kDa		✓			5		1.66942e+06			✓
1007	Q8IZ07	Ankyrin repeat domain-containing protein 13A	ANKRD13A	68 kDa					5		368757			✓
1008	Q8WXD2	Secretogranin-3	SCG3	53 kDa	✓	✓			5		321897			✓
1009	P35611	Alpha-adducin	ADD1	81 kDa					5		229440			✓
1010	P98161	Polycystin-1	PKD1	463 kDa		✓	✓		5		3.07198e+06			✓
1011	Q15042	Rab3 GTPase-activating protein catalytic subunit	RAB3GAP1	111 kDa			✓		5		117729			✓
1012	Q96HC4	PDZ and LIM domain protein 5	PDLIM5	64 kDa					5		353121			✓
1013	Q14247	Src substrate cortactin	CTTN	62 kDa					5		6407744			✓
1014	O14562	Ubiquitin domain-containing protein UBFD1	UBFD1	33 kDa					5		222647			✓
1015	Q5H9R7	Serine/threonine-protein phosphatase 6 regulatory subunit 3	PPP6R3	98 kDa					5		29880.7			✓
1016	O00170	AH receptor-interacting protein	AIP	38 kDa					5		1.57179e+06			✓
1017	Q32MZ4	Leucine-rich repeat flightless-interacting protein 1	LRRFIP1	89 kDa					5		667842			✓
1018	Q9BZ29	Dedicator of cytokinesis protein 9	DOCK9	236 kDa					5		489522			✓
1019	Q8N1G4	Leucine-rich repeat-containing protein 47	LRRC47	63 kDa					5		3441622			✓
1020	O60333	Kinesin-like protein KIF1B	KIF1B	204 kDa					5		1.41672e+06			✓
1021	Q8IZ52	Chondroitin sulfate synthase 2	CHPF	85 kDa					5		361617			✓
1022	P41227	N-alpha-acetyltransferase 10	NAA10	26 kDa					5		271088			✓
1023	P36404	ADP-ribosylation factor-like protein 2	ARL2	21 kDa					5		Missing Value			✓
1024	Q8WWM7	Ataxin-2-like protein	ATXN2L	113 kDa					5		571647			✓
1025	P10155	60 kDa SS-A/Ro ribonucleoprotein	RO60	61 kDa					5		311156			✓
1026	Q9BQG0	Myb-binding protein 1A	MYBBP1A	149 kDa					5		717042			✓
1027	P55263	Adenosine kinase	ADK	41 kDa					5		401215			✓
1028	P36776	Lon protease homolog, mitochondrial	LONP1	106 kDa					5		657257			✓
1029	Q9UNA0	A disintegrin and metalloproteinase with thrombospondin motifs 5	ADAMTS5	102 kDa	✓	✓			5		453143			✓
1030	O75312	Zinc finger protein ZPR1	ZPR1	51 kDa					5		841289			✓
1031	P28300	Protein-lysine 6-oxidase	LOX	47 kDa	✓	✓			5		2.7238e+06			✓
1032	Q9NS15	Latent-transforming growth factor beta-binding protein 3	LTBP3	139 kDa	✓	✓	✓		5		1.81435e+06			✓
1033	Q9Y2T3	Guanine deaminase	GDA	51 kDa					5		362453			✓
1034	P78527	DNA-dependent protein kinase catalytic subunit	PRKDC	469 kDa					5		573776			✓
1035	Q5KU26	Collectin-12	COLEC12	82 kDa					5		154714			✓
1036	Q13217	DnaJ homolog subfamily C member 3	DNAJC3	58 kDa		✓	✓		5		315852			✓
1037	Q9Y315	Deoxyribose-phosphate aldolase	DERA	35 kDa					5		119361			✓
1038	Q68CQ7	Glycosyltransferase 8 domain-containing protein 1	GLT8D1	42 kDa					5		2.2212e+06			✓
1039	Q8IWA5	Choline transporter-like protein 2	SLC44A2	80 kDa			✓		5		697355			✓
1040	O14656	Torsin-1A	TOR1A	38 kDa		✓	✓		5		453031			✓
1041	P78539	Sushi repeat-containing protein SRPX	SRPX	52 kDa	✓	✓			5		580356			✓
1042	P40123	Adenylyl cyclase-associated protein 2	CAP2	53 kDa					5		2.64518e+07			✓
1043	P53999	Activated RNA polymerase II transcriptional coactivator p15	SUB1	14 kDa			✓		4		1.3556e+07			✓
1044	Q9UHD1	Cysteine and histidine-rich domain-containing protein 1	CHORDC1	37 kDa					4		7.88917e+06			✓
1045	Q13011	Delta(3,5)-Delta(2,4)-dienoyl-CoA isomerase, mitochondrial	ECH1	36 kDa			✓		4		2.07378e+06			✓
1046	P19971	Thymidine phosphorylase	TYMP	50 kDa					4		497348			✓
1047	Q9P287	BRCA2 and CDKN1A-interacting protein	BCCIP	36 kDa					4		2.2417e+06			✓
1048	Q00266	S-adenosylmethionine synthase isoform type-1	MAT1A	44 kDa					4		1.11284e+06			✓
1049	P23588	Eukaryotic translation initiation factor 4B	EIF4B	69 kDa					4		2.24041e+06			✓
1050	Q15637	Splicing factor 1	SF1	68 kDa					4		1820943			✓
1051	Q9NZ20	Group 3 secretory phospholipase A2	PLA2G3	57 kDa	✓	✓			4		1.74894e+06			✓
1052	P35244	Replication protein A 14 kDa subunit	RPA3	14 kDa					4		1426432			✓
1053	P18754	Regulator of chromosome condensation	RCC1	45 kDa					4		3942005			✓
1054	P38159	RNA-binding motif protein, X chromosome	RBMX	42 kDa			✓		4		2344823			✓
1055	O95816	BAG family molecular chaperone regulator 2	BAG2	24 kDa					4		3.24753e+06			✓
1056	Q9H1E3	Nuclear ubiquitous casein and cyclin-dependent kinase substrate 1	NUCKS1	27 kDa					4		2847847			✓
1057	P31040	Succinate dehydrogenase [ubiquinone] flavoprotein subunit, mitochondrial	SDHA	73 kDa					4		1.10477e+06			✓
1058	Q96GG9	DCN1-like protein 1	DCUN1D1	30 kDa					4		4.51003e+06			✓
1059	Q99808	Equilibrative nucleoside transporter 1	SLC29A1	50 kDa					4		1.42184e+06			✓
1060	P55039	Developmentally-regulated GTP-binding protein 2	DRG2	41 kDa					4		2152445			✓
1061	Q9H074	Polyadenylate-binding protein-interacting protein 1	PAIP1	54 kDa					4		1.86066e+06			✓
1062	P38117	Electron transfer flavoprotein subunit beta	ETFB	28 kDa					4		3098114			✓
1063	O75390	Citrate synthase, mitochondrial	CS	52 kDa			✓		4		3.33056e+06			✓
1064	Q53EL6	Programmed cell death protein 4	PDCD4	52 kDa					4		2.64854e+06			✓
1065	Q96PZ0	Pseudouridylate synthase 7 homolog	PUS7	75 kDa					4		1264542			✓
1066	Q9H4A6	Golgi phosphoprotein 3	GOLPH3	34 kDa					4		2240914			✓
1067	Q9BT09	Protein canopy homolog 3	CNPY3	31 kDa		✓			4		60049.6			✓
1068	O15511	Actin-related protein 2/3 complex subunit 5	ARPC5	16 kDa			✓		4		159608			✓
1069	P39748	Flap endonuclease 1	FEN1	43 kDa					4		6.34725e+06			✓
1070	Q11206	CMP-N-acetylneuraminate-beta-galactosamide-alpha-2,3-sialyltransferase 4	ST3GAL4	38 kDa					4		5.17498e+06			✓
1071	Q96CT7	Coiled-coil domain-containing protein 124	CCDC124	26 kDa					4		1.11203e+06			✓
1072	Q9Y5X1	Sorting nexin-9	SNX9	67 kDa			✓		4		3.11232e+06			✓
1073	P28065	Proteasome subunit beta type-9	PSMB9	23 kDa			✓		4		137256			✓
1074	O60256	Phosphoribosyl pyrophosphate synthase-associated protein 2	PRPSAP2	41 kDa					4		1.99667e+06			✓
1075	P33908	Mannosyl-oligosaccharide 1,2-alpha-mannosidase IA	MAN1A1	73 kDa			✓		4		2.32038e+06			✓
1076	P09417	Dihydropteridine reductase	QDPR	26 kDa			✓		4		473166			✓
1077	O76021	Ribosomal L1 domain-containing protein 1	RSL1D1	55 kDa					4		4638229			✓
1078	Q9Y383	Putative RNA-binding protein Luc7-like 2	LUC7L2	47 kDa					4		1.81747e+06			✓
1079	Q8N584	Tetratricopeptide repeat protein 39C	TTC39C	66 kDa					4		1.63409e+06			✓
1080	O43815	Striatin	STRN	86 kDa					4		884479			✓
1081	Q06265	Exosome complex component RRP45	EXOSC9	49 kDa			✓		4		998958			✓
1082	O00743	Serine/threonine-protein phosphatase 6 catalytic subunit	PPP6C	35 kDa					4		877359			✓
1083	P42167	Lamina-associated polypeptide 2, isoforms beta/gamma	TMPO	51 kDa					4		370297			✓
1084	Q9Y285	Phenylalanine--tRNA ligase alpha subunit	FARSA	58 kDa					4		1.22364e+06			✓
1085	Q9BUT1	3-hydroxybutyrate dehydrogenase type 2	BDH2	27 kDa			✓		4		1478947			✓
1086	Q15642	Cdc42-interacting protein 4	TRIP10	68 kDa			✓		4		2.14464e+06			✓
1087	P61812	Transforming growth factor beta-2 proprotein	TGFB2	48 kDa	✓	✓			4		4.38585e+06			✓
1088	Q8NES3	Beta-1,3-N-acetylglucosaminyltransferase lunatic fringe	LFNG	42 kDa					4		595777			✓
1089	Q9BWS9	Chitinase domain-containing protein 1	CHID1	45 kDa		✓	✓		4		2.16077e+06			✓
1090	Q9H814	Phosphorylated adapter RNA export protein	PHAX	44 kDa					4		361452			✓
1091	Q96TC7	Regulator of microtubule dynamics protein 3	RMDN3	52 kDa					4		1.15382e+06			✓
1092	O43324	Eukaryotic translation elongation factor 1 epsilon-1	EEF1E1	20 kDa					4		3342061			✓
1093	O60476	Mannosyl-oligosaccharide 1,2-alpha-mannosidase IB	MAN1A2	73 kDa			✓		4		983902			✓
1094	O75063	Glycosaminoglycan xylosylkinase	FAM20B	46 kDa		✓			4		2205404			✓
1095	Q9UBE0	SUMO-activating enzyme subunit 1	SAE1	38 kDa					4		345503			✓
1096	Q03252	Lamin-B2	LMNB2	70 kDa					4		2.23517e+06			✓
1097	Q8NBJ5	Procollagen galactosyltransferase 1	COLGALT1	72 kDa		✓			4		2728861			✓
1098	Q00973	Beta-1,4 N-acetylgalactosaminyltransferase 1	B4GALNT1	59 kDa					4		252972			✓
1099	Q9GZL7	Ribosome biogenesis protein WDR12	WDR12	48 kDa					4		1.81195e+06			✓
1100	P28072	Proteasome subunit beta type-6	PSMB6	25 kDa			✓		4		4884472			✓
1101	P00167	Cytochrome b5	CYB5A	15 kDa					4		213489			✓
1102	Q9NR45	Sialic acid synthase	NANS	40 kDa			✓		4		720310			✓
1103	Q9H832	Ubiquitin-conjugating enzyme E2 Z	UBE2Z	38 kDa					4		1704783			✓
1104	P53992	Protein transport protein Sec24C	SEC24C	118 kDa					4		441005			✓
1105	Q9UBX1	Cathepsin F	CTSF	53 kDa		✓	✓		4		1826294			✓
1106	Q99614	Tetratricopeptide repeat protein 1	TTC1	34 kDa					4		727208			✓
1107	Q9BQL6	Fermitin family homolog 1	FERMT1	77 kDa					4		588462			✓
1108	Q9NXH9	tRNA (guanine(26)-N(2))-dimethyltransferase	TRMT1	72 kDa					4		416500			✓
1109	Q86XP3	ATP-dependent RNA helicase DDX42	DDX42	103 kDa					4		1.19305e+06			✓
1110	Q7Z3J2	VPS35 endosomal protein sorting factor-like	VPS35L	110 kDa					4		588216			✓
1111	P15907	Beta-galactoside alpha-2,6-sialyltransferase 1	ST6GAL1	47 kDa	✓				4		651230			✓
1112	Q99784	Noelin	OLFM1	55 kDa	✓	✓			4		1192303			✓
1113	Q9NVX2	Notchless protein homolog 1	NLE1	53 kDa					4		1378054			✓
1114	Q27J81	Inverted formin-2	INF2	136 kDa					4		101398			✓
1115	O00267	Transcription elongation factor SPT5	SUPT5H	121 kDa					4		174112			✓
1116	Q9Y5F8	Protocadherin gamma-B7	PCDHGB7	101 kDa		✓			4		1222278			✓
1117	Q13561	Dynactin subunit 2	DCTN2	44 kDa			✓		4		1.84616e+06			✓
1118	O75191	Xylulose kinase	XYLB	58 kDa					4		198956			✓
1119	Q9BQ52	Zinc phosphodiesterase ELAC protein 2	ELAC2	92 kDa					4		1.53794e+06			✓
1120	P48637	Glutathione synthetase	GSS	52 kDa			✓		4		364068			✓
1121	P17301	Integrin alpha-2	ITGA2	129 kDa		✓			4		Missing Value			✓
1122	Q9UKE5	TRAF2 and NCK-interacting protein kinase	TNIK	155 kDa			✓		4		1.27484e+06			✓
1123	Q9Y6M5	Zinc transporter 1	SLC30A1	55 kDa					4		3088343			✓
1124	Q9BTE3	Mini-chromosome maintenance complex-binding protein	MCMBP	73 kDa					4		962650			✓
1125	Q96RS6	NudC domain-containing protein 1	NUDCD1	67 kDa					4		676194			✓
1126	Q0IIM8	TBC1 domain family member 8B	TBC1D8B	129 kDa					4		105170			✓
1127	P19838	Nuclear factor NF-kappa-B p105 subunit	NFKB1	105 kDa					4		298390			✓
1128	Q9BQS7	Hephaestin	HEPH	130 kDa		✓			4		355611			✓
1129	Q9Y520	Protein PRRC2C	PRRC2C	317 kDa					4		1.07714e+06			✓
1130	O94991	SLIT and NTRK-like protein 5	SLITRK5	107 kDa		✓			4		106864			✓
1131	O95831	Apoptosis-inducing factor 1, mitochondrial	AIFM1	67 kDa		✓			4		1.92419e+06			✓
1132	P22897	Macrophage mannose receptor 1	MRC1	166 kDa		✓			4		3.913e+06			✓
1133	Q9H7D0	Dedicator of cytokinesis protein 5	DOCK5	215 kDa					4		753934			✓
1134	Q13153	Serine/threonine-protein kinase PAK 1	PAK1	61 kDa					4		723578			✓
1135	Q8WW12	PEST proteolytic signal-containing nuclear protein	PCNP	19 kDa					4		430844			✓
1136	Q9UQ53	Alpha-1,3-mannosyl-glycoprotein 4-beta-N-acetylglucosaminyltransferase B	MGAT4B	63 kDa					4		758555			✓
1137	O95817	BAG family molecular chaperone regulator 3	BAG3	62 kDa					4		148042			✓
1138	Q8IV08	5'-3' exonuclease PLD3	PLD3	55 kDa			✓		4		212862			✓
1139	P02679	Fibrinogen gamma chain	FGG	52 kDa	✓	✓	✓		4		8.11181e+06			✓
1140	Q9Y5S2	Serine/threonine-protein kinase MRCK beta	CDC42BPB	194 kDa			✓		4		125727			✓
1141	Q99447	Ethanolamine-phosphate cytidylyltransferase	PCYT2	44 kDa					4		Missing Value			✓
1142	P26572	Alpha-1,3-mannosyl-glycoprotein 2-beta-N-acetylglucosaminyltransferase	MGAT1	51 kDa			✓		4		822164			✓
1143	Q14258	E3 ubiquitin/ISG15 ligase TRIM25	TRIM25	71 kDa					4		320907			✓
1144	Q9Y4C0	Neurexin-3	NRXN3	181 kDa		✓			4		165797			✓
1145	P30990	Neurotensin/neuromedin N	NTS	20 kDa	✓	✓			3		7.67416e+06			✓
1146	Q14031	Collagen alpha-6(IV) chain	COL4A6	164 kDa	✓	✓			3		5.3466e+06			✓
1147	O15347	High mobility group protein B3	HMGB3	23 kDa					3		2709450			✓
1148	O43915	Vascular endothelial growth factor D	VEGFD	40 kDa	✓	✓			3		85440.5			✓
1149	O95456	Proteasome assembly chaperone 1	PSMG1	33 kDa					3		286568			✓
1150	P02792	Ferritin light chain	FTL	20 kDa			✓		3		2.53054e+06			✓
1151	Q9Y5S9	RNA-binding protein 8A	RBM8A	20 kDa					3		6445760			✓
1152	P62633	Cellular nucleic acid-binding protein	CNBP	19 kDa					3		2019443			✓
1153	A0A1B0GUY1	MARCO-like protein	MARCOL	30 kDa					3		3.23875e+06			✓
1154	Q96I82	Kazal-type serine protease inhibitor domain-containing protein 1	KAZALD1	33 kDa	✓	✓			3		2.82521e+06			✓
1155	Q9UJH8	Meteorin	METRN	31 kDa	✓	✓			3		2.12871e+06			✓
1156	O75629	Protein CREG1	CREG1	24 kDa	✓	✓	✓		3		2656186			✓
1157	Q9NZ53	Podocalyxin-like protein 2	PODXL2	65 kDa		✓			3		1.69266e+06			✓
1158	Q14114	Low-density lipoprotein receptor-related protein 8	LRP8	106 kDa		✓			3		1.07943e+06			✓
1159	Q8WWQ8	Stabilin-2	STAB2	277 kDa		✓			3		328536			✓
1160	O95372	Acyl-protein thioesterase 2	LYPLA2	25 kDa			✓		3		1.29757e+06			✓
1161	P62318	Small nuclear ribonucleoprotein Sm D3	SNRPD3	14 kDa					3		1.30655e+07			✓
1162	O94766	Galactosylgalactosylxylosylprotein 3-beta-glucuronosyltransferase 3	B3GAT3	37 kDa			✓		3		3114478			✓
1163	Q5TDH0	Protein DDI1 homolog 2	DDI2	45 kDa					3		287450			✓
1164	Q9NX58	Cell growth-regulating nucleolar protein	LYAR	44 kDa					3		1791715			✓
1165	Q15904	V-type proton ATPase subunit S1	ATP6AP1	52 kDa		✓	✓		3		847910			✓
1166	P11766	Alcohol dehydrogenase class-3	ADH5	40 kDa			✓		3		213096			✓
1167	Q01844	RNA-binding protein EWS	EWSR1	68 kDa					3		7.27004e+06			✓
1168	P51511	Matrix metalloproteinase-15	MMP15	76 kDa		✓			3		4.62751e+06			✓
1169	P24752	Acetyl-CoA acetyltransferase, mitochondrial	ACAT1	45 kDa			✓		3		1.2474e+06			✓
1170	Q9NRJ7	Protocadherin beta-16	PCDHB16	85 kDa		✓			3		4.79861e+06			✓
1171	Q9H2J4	Phosducin-like protein 3	PDCL3	28 kDa					3		197845			✓
1172	O60936	Nucleolar protein 3	NOL3	23 kDa					3		1230544			✓
1173	Q96QR8	Transcriptional activator protein Pur-beta	PURB	33 kDa					3		1.07177e+06			✓
1174	P26447	Protein S100-A4	S100A4	12 kDa			✓		3		1.05284e+07			✓
1175	Q92882	Osteoclast-stimulating factor 1	OSTF1	24 kDa					3		324388			✓
1176	Q7Z4W1	L-xylulose reductase	DCXR	26 kDa			✓		3		98432.2			✓
1177	P02749	Beta-2-glycoprotein 1	APOH	38 kDa	✓	✓	✓		3		6.36782e+06			✓
1178	P16989	Y-box-binding protein 3	YBX3	40 kDa					3		2.44319e+06			✓
1179	Q13895	Bystin	BYSL	50 kDa					3		378157			✓
1180	Q8TEQ6	Gem-associated protein 5	GEMIN5	169 kDa					3		1.35441e+06			✓
1181	P19875	C-X-C motif chemokine 2	CXCL2	11 kDa	✓	✓			3		1.91783e+06			✓
1182	Q86V40	Metalloprotease TIKI1	TRABD2A	58 kDa		✓			3		375572			✓
1183	Q9BXS6	Nucleolar and spindle-associated protein 1	NUSAP1	49 kDa					3		494676			✓
1184	Q08257	Quinone oxidoreductase	CRYZ	35 kDa			✓		3		366093			✓
1185	Q9NVP1	ATP-dependent RNA helicase DDX18	DDX18	75 kDa					3		165954			✓
1186	Q13232	Nucleoside diphosphate kinase 3	NME3	19 kDa					3		1.18684e+06			✓
1187	Q13242	Serine/arginine-rich splicing factor 9	SRSF9	26 kDa					3		1608317			✓
1188	P26358	DNA (cytosine-5)-methyltransferase 1	DNMT1	183 kDa					3		871399			✓
1189	Q9UJ70	N-acetyl-D-glucosamine kinase	NAGK	37 kDa			✓		3		1.18229e+06			✓
1190	Q96EU7	C1GALT1-specific chaperone 1	C1GALT1C1	36 kDa			✓		3		3.82666e+06			✓
1191	Q8WTV0	Scavenger receptor class B member 1	SCARB1	61 kDa			✓		3		2414695			✓
1192	Q13155	Aminoacyl tRNA synthase complex-interacting multifunctional protein 2	AIMP2	35 kDa					3		1333378			✓
1193	Q9BRT9	DNA replication complex GINS protein SLD5	GINS4	26 kDa					3		357731			✓
1194	P15559	NAD(P)H dehydrogenase [quinone] 1	NQO1	31 kDa					3		5363484			✓
1195	Q9BY43	Charged multivesicular body protein 4a	CHMP4A	25 kDa					3		751832			✓
1196	P78318	Immunoglobulin-binding protein 1	IGBP1	39 kDa					3		376431			✓
1197	Q9UK05	Growth/differentiation factor 2	GDF2	47 kDa	✓	✓	✓		3		3837574			✓
1198	P51659	Peroxisomal multifunctional enzyme type 2	HSD17B4	80 kDa					3		710695			✓
1199	Q92673	Sortilin-related receptor	SORL1	248 kDa		✓	✓		3		21394.7			✓
1200	P55210	Caspase-7	CASP7	34 kDa					3		343206			✓
1201	O15479	Melanoma-associated antigen B2	MAGEB2	35 kDa					3		1308332			✓
1202	Q2VWP7	Protogenin	PRTG	127 kDa		✓			3		1.17921e+06			✓
1203	Q1KMD3	Heterogeneous nuclear ribonucleoprotein U-like protein 2	HNRNPUL2	85 kDa					3		1.86614e+06			✓
1204	Q14641	Early placenta insulin-like peptide	INSL4	15 kDa	✓	✓			3		5938726			✓
1205	P42765	3-ketoacyl-CoA thiolase, mitochondrial	ACAA2	42 kDa					3		1.91762e+06			✓
1206	Q69YN2	CWF19-like protein 1	CWF19L1	61 kDa					3		477127			✓
1207	O75173	A disintegrin and metalloproteinase with thrombospondin motifs 4	ADAMTS4	90 kDa		✓			3		595586			✓
1208	P07954	Fumarate hydratase, mitochondrial	FH	55 kDa			✓		3		2363898			✓
1209	O43818	U3 small nucleolar RNA-interacting protein 2	RRP9	52 kDa					3		412570			✓
1210	P80217	Interferon-induced 35 kDa protein	IFI35	32 kDa					3		1.71308e+06			✓
1211	Q9Y5K6	CD2-associated protein	CD2AP	71 kDa			✓		3		1.19264e+06			✓
1212	O43488	Aflatoxin B1 aldehyde reductase member 2	AKR7A2	40 kDa			✓		3		968412			✓
1213	Q96B97	SH3 domain-containing kinase-binding protein 1	SH3KBP1	73 kDa					3		40738.5			✓
1214	Q92564	DCN1-like protein 4	DCUN1D4	34 kDa					3		184775			✓
1215	P35858	Insulin-like growth factor-binding protein complex acid labile subunit	IGFALS	66 kDa		✓	✓		3		19777420			✓
1216	P04843	Dolichyl-diphosphooligosaccharide--protein glycosyltransferase subunit 1	RPN1	69 kDa		✓			3		471728			✓
1217	Q96NU7	Probable imidazolonepropionase	AMDHD1	47 kDa					3		1310811			✓
1218	Q14344	Guanine nucleotide-binding protein subunit alpha-13	GNA13	44 kDa			✓		3		1.71451e+07			✓
1219	Q16836	Hydroxyacyl-coenzyme A dehydrogenase, mitochondrial	HADH	34 kDa					3		1041912			✓
1220	Q92791	Endoplasmic reticulum protein SC65	P3H4	50 kDa					3		750708			✓
1221	P56537	Eukaryotic translation initiation factor 6	EIF6	27 kDa			✓		3		1.54477e+06			✓
1222	Q9H0D6	5'-3' exoribonuclease 2	XRN2	109 kDa					3		142796			✓
1223	Q14554	Protein disulfide-isomerase A5	PDIA5	60 kDa		✓			3		1.61352e+06			✓
1224	P42574	Caspase-3	CASP3	32 kDa					3		3.03479e+06			✓
1225	P13804	Electron transfer flavoprotein subunit alpha, mitochondrial	ETFA	35 kDa					3		1333330			✓
1226	Q13435	Splicing factor 3B subunit 2	SF3B2	100 kDa					3		1.52371e+06			✓
1227	Q9BTW9	Tubulin-specific chaperone D	TBCD	133 kDa					3		213565			✓
1228	P24666	Low molecular weight phosphotyrosine protein phosphatase	ACP1	18 kDa			✓		3		318642			✓
1229	Q15785	Mitochondrial import receptor subunit TOM34	TOMM34	35 kDa					3		1595148			✓
1230	P49792	E3 SUMO-protein ligase RanBP2	RANBP2	358 kDa					3		478412			✓
1231	Q7Z417	Nuclear fragile X mental retardation-interacting protein 2	NUFIP2	76 kDa					3		652316			✓
1232	P48454	Serine/threonine-protein phosphatase 2B catalytic subunit gamma isoform	PPP3CC	58 kDa					3		4.00515e+06			✓
1233	Q8TDN6	Ribosome biogenesis protein BRX1 homolog	BRIX1	41 kDa					3		816512			✓
1234	O95400	CD2 antigen cytoplasmic tail-binding protein 2	CD2BP2	38 kDa					3		1.34061e+06			✓
1235	Q9NPF4	Probable tRNA N6-adenosine threonylcarbamoyltransferase	OSGEP	36 kDa					3		22225.9			✓
1236	P14780	Matrix metalloproteinase-9	MMP9	78 kDa	✓	✓	✓		3		824169			✓
1237	Q10469	Alpha-1,6-mannosyl-glycoprotein 2-beta-N-acetylglucosaminyltransferase	MGAT2	52 kDa					3		822763			✓
1238	Q6ZN66	Guanylate-binding protein 6	GBP6	72 kDa			✓		3		1.40832e+06			✓
1239	O43615	Mitochondrial import inner membrane translocase subunit TIM44	TIMM44	51 kDa					3		306116			✓
1240	Q02241	Kinesin-like protein KIF23	KIF23	110 kDa					3		96798.2			✓
1241	O60832	H/ACA ribonucleoprotein complex subunit DKC1	DKC1	58 kDa					3		616858			✓
1242	Q13459	Unconventional myosin-IXb	MYO9B	243 kDa					3		202640			✓
1243	Q9UHN6	Cell surface hyaluronidase	CEMIP2	154 kDa			✓		3		354397			✓
1244	P01008	Antithrombin-III	SERPINC1	53 kDa	✓	✓	✓		3		795553			✓
1245	P53609	Geranylgeranyl transferase type-1 subunit beta	PGGT1B	42 kDa					3		3.70939e+06			✓
1246	P17050	Alpha-N-acetylgalactosaminidase	NAGA	47 kDa		✓	✓		3		184236			✓
1247	Q8NHP8	Putative phospholipase B-like 2	PLBD2	65 kDa		✓	✓		3		1.01116e+06			✓
1248	Q8TDX6	Chondroitin sulfate N-acetylgalactosaminyltransferase 1	CSGALNACT1	61 kDa					3		77623.1			✓
1249	Q5R372	Rab GTPase-activating protein 1-like	RABGAP1L	93 kDa					3		474600			✓
1250	Q9ULA0	Aspartyl aminopeptidase	DNPEP	52 kDa					3		163310			✓
1251	P39656	Dolichyl-diphosphooligosaccharide--protein glycosyltransferase 48 kDa subunit	DDOST	51 kDa		✓			3		1.14967e+06			✓
1252	Q96GM8	Target of EGR1 protein 1	TOE1	57 kDa					3		694930			✓
1253	Q49A17	Polypeptide N-acetylgalactosaminyltransferase-like 6	GALNTL6	70 kDa					3		250716			✓
1254	P42166	Lamina-associated polypeptide 2, isoform alpha	TMPO	75 kDa					3		1.02629e+06			✓
1255	Q16831	Uridine phosphorylase 1	UPP1	34 kDa					3		63552.9			✓
1256	P05156	Complement factor I	CFI	66 kDa	✓	✓	✓		3		264355			✓
1257	Q9C0C4	Semaphorin-4C	SEMA4C	93 kDa		✓			3		1.10762e+06			✓
1258	P68402	Platelet-activating factor acetylhydrolase IB subunit beta	PAFAH1B2	26 kDa			✓		2		2.31255e+06			✓
1259	P23297	Protein S100-A1	S100A1	11 kDa					2		8.54495e+06			✓
1260	Q9HB63	Netrin-4	NTN4	70 kDa	✓	✓			2		1.10943e+06			✓
1261	P14209	CD99 antigen	CD99	19 kDa		✓			2		506367			✓
1262	P11215	Integrin alpha-M	ITGAM	127 kDa		✓	✓		2		1153222			✓
1263	O75937	DnaJ homolog subfamily C member 8	DNAJC8	30 kDa					2		903472			✓
1264	O43820	Hyaluronidase-3	HYAL3	47 kDa	✓	✓			2		863913			✓
1265	P07357	Complement component C8 alpha chain	C8A	65 kDa	✓	✓	✓		2		731375			✓
1266	Q9NR19	Acetyl-coenzyme A synthetase, cytoplasmic	ACSS2	79 kDa					2		252201			✓
1267	P05114	Non-histone chromosomal protein HMG-14	HMGN1	11 kDa					2		202995			✓
1268	Q99584	Protein S100-A13	S100A13	11 kDa	✓				2		5.43594e+06			✓
1269	P30533	Alpha-2-macroglobulin receptor-associated protein	LRPAP1	41 kDa		✓			2		3186423			✓
1270	O15514	DNA-directed RNA polymerase II subunit RPB4	POLR2D	16 kDa					2		388276			✓
1271	P12883	Myosin-7	MYH7	223 kDa					2		94910.2			✓
1272	O75348	V-type proton ATPase subunit G 1	ATP6V1G1	14 kDa			✓		2		2028266			✓
1273	O00592	Podocalyxin	PODXL	59 kDa		✓	✓		2		177270			✓
1274	O75531	Barrier-to-autointegration factor	BANF1	10 kDa					2		4.25642e+06			✓
1275	Q8TER0	Sushi, nidogen and EGF-like domain-containing protein 1	SNED1	152 kDa	✓	✓			2		1431947			✓
1276	Q6GMV2	SET and MYND domain-containing protein 5	SMYD5	47 kDa					2		845120			✓
1277	Q96N76	Urocanate hydratase	UROC1	75 kDa					2		17916670			✓
1278	P40261	Nicotinamide N-methyltransferase	NNMT	30 kDa					2		316304			✓
1279	P49366	Deoxyhypusine synthase	DHPS	41 kDa					2		143914			✓
1280	P55145	Mesencephalic astrocyte-derived neurotrophic factor	MANF	21 kDa	✓	✓			2		289289			✓
1281	P18615	Negative elongation factor E	NELFE	43 kDa					2		349684			✓
1282	Q6YN16	Hydroxysteroid dehydrogenase-like protein 2	HSDL2	45 kDa					2		323068			✓
1283	Q96HF1	Secreted frizzled-related protein 2	SFRP2	33 kDa	✓	✓			2		333202			✓
1284	Q8N806	Putative E3 ubiquitin-protein ligase UBR7	UBR7	48 kDa					2		494038			✓
1285	Q96ER3	Protein SAAL1	SAAL1	54 kDa					2		61830.5			✓
1286	Q53H96	Pyrroline-5-carboxylate reductase 3	PYCR3	29 kDa					2		1164860			✓
1287	P09496	Clathrin light chain A	CLTA	27 kDa					2		1.84226e+06			✓
1288	Q9Y2E5	Epididymis-specific alpha-mannosidase	MAN2B2	114 kDa	✓	✓	✓		2		230659			✓
1289	Q8IYB3	Serine/arginine repetitive matrix protein 1	SRRM1	102 kDa					2		182941			✓
1290	P98082	Disabled homolog 2	DAB2	82 kDa					2		169404			✓
1291	Q9P0V9	Septin-10	SEPTIN10	53 kDa					2		311652			✓
1292	P37108	Signal recognition particle 14 kDa protein	SRP14	15 kDa					2		2.18668e+06			✓
1293	Q96AZ6	Interferon-stimulated gene 20 kDa protein	ISG20	20 kDa					2		252522			✓
1294	Q8IUI8	Cytokine receptor-like factor 3	CRLF3	50 kDa					2		2.17578e+06			✓
1295	Q86VB7	Scavenger receptor cysteine-rich type 1 protein M130	CD163	125 kDa		✓			2		325852			✓
1296	P04066	Tissue alpha-L-fucosidase	FUCA1	54 kDa		✓	✓		2		4.29178e+06			✓
1297	Q8N441	Fibroblast growth factor receptor-like 1	FGFRL1	55 kDa		✓			2		1.48519e+06			✓
1298	Q9UKK9	ADP-sugar pyrophosphatase	NUDT5	24 kDa			✓		2		3.77539e+06			✓
1299	P05305	Endothelin-1	EDN1	24 kDa	✓	✓			2		2.65233e+06			✓
1300	Q15102	Platelet-activating factor acetylhydrolase IB subunit gamma	PAFAH1B3	26 kDa					2		2.91305e+06			✓
1301	Q9NQC3	Reticulon-4	RTN4	130 kDa					2		1.82994e+06			✓
1302	P53985	Monocarboxylate transporter 1	SLC16A1	54 kDa			✓		2		718145			✓
1303	Q8WUX1	Sodium-coupled neutral amino acid transporter 5	SLC38A5	51 kDa					2		7000948			✓
1304	Q9NX24	H/ACA ribonucleoprotein complex subunit 2	NHP2	17 kDa					2		650124			✓
1305	Q14978	Nucleolar and coiled-body phosphoprotein 1	NOLC1	74 kDa					2		558460			✓
1306	P18031	Tyrosine-protein phosphatase non-receptor type 1	PTPN1	50 kDa					2		585934			✓
1307	P09914	Interferon-induced protein with tetratricopeptide repeats 1	IFIT1	55 kDa					2		178713			✓
1308	P02760	Protein AMBP	AMBP	39 kDa	✓	✓	✓		2		356741			✓
1309	Q9UI10	Translation initiation factor eIF-2B subunit delta	EIF2B4	58 kDa					2		198479			✓
1310	Q9NVM4	Protein arginine N-methyltransferase 7	PRMT7	78 kDa					2		114293			✓
1311	Q9BTE6	Alanyl-tRNA editing protein Aarsd1	AARSD1	45 kDa					2		Missing Value			✓
1312	O14929	Histone acetyltransferase type B catalytic subunit	HAT1	50 kDa					2		2.53519e+06			✓
1313	Q9H239	Matrix metalloproteinase-28	MMP28	59 kDa	✓	✓			2		1.33948e+06			✓
1314	Q16698	2,4-dienoyl-CoA reductase, mitochondrial	DECR1	36 kDa					2		834709			✓
1315	Q15813	Tubulin-specific chaperone E	TBCE	59 kDa					2		148494			✓
1316	Q15654	Thyroid receptor-interacting protein 6	TRIP6	50 kDa					2		525141			✓
1317	P09543	2',3'-cyclic-nucleotide 3'-phosphodiesterase	CNP	48 kDa	✓		✓		2		573539			✓
1318	Q9HCD5	Nuclear receptor coactivator 5	NCOA5	66 kDa					2		17199.7			✓
1319	Q13433	Zinc transporter ZIP6	SLC39A6	85 kDa		✓			2		1.40556e+06			✓
1320	Q8IZ73	RNA pseudouridylate synthase domain-containing protein 2	RPUSD2	61 kDa					2		128556			✓
1321	O75935	Dynactin subunit 3	DCTN3	21 kDa					2		409463			✓
1322	Q13112	Chromatin assembly factor 1 subunit B	CHAF1B	61 kDa					2		314897			✓
1323	Q9HB07	UPF0160 protein MYG1, mitochondrial	C12orf10	42 kDa					2		792384			✓
1324	Q14192	Four and a half LIM domains protein 2	FHL2	32 kDa					2		352839			✓
1325	Q9H788	SH2 domain-containing protein 4A	SH2D4A	53 kDa					2		514502			✓
1326	Q96JH7	Deubiquitinating protein VCIP135	VCPIP1	134 kDa					2		515462			✓
1327	Q96L58	Beta-1,3-galactosyltransferase 6	B3GALT6	37 kDa					2		242794			✓
1328	P83110	Serine protease HTRA3	HTRA3	49 kDa	✓	✓			2		640623			✓
1329	Q9Y219	Protein jagged-2	JAG2	133 kDa		✓			2		78517.5			✓
1330	Q00888	Pregnancy-specific beta-1-glycoprotein 4	PSG4	47 kDa	✓	✓			2		1.39618e+06			✓
1331	P54709	Sodium/potassium-transporting ATPase subunit beta-3	ATP1B3	32 kDa			✓		2		281077			✓
1332	Q8NFW1	Collagen alpha-1(XXII) chain	COL22A1	161 kDa	✓	✓			2		661712			✓
1333	Q6UWX4	HHIP-like protein 2	HHIPL2	81 kDa	✓	✓			2		371030			✓
1334	Q9BY42	Replication termination factor 2	RTF2	34 kDa					2		304701			✓
1335	P00740	Coagulation factor IX	F9	52 kDa	✓	✓	✓		2		585903300			✓
1336	P98179	RNA-binding protein 3	RBM3	17 kDa					2		587274			✓
1337	Q8NEZ5	F-box only protein 22	FBXO22	45 kDa					2		313080			✓
1338	O14763	Tumor necrosis factor receptor superfamily member 10B	TNFRSF10B	48 kDa		✓			2		153889			✓
1339	O75521	Enoyl-CoA delta isomerase 2, mitochondrial	ECI2	44 kDa					2		167444			✓
1340	Q9H2H9	Sodium-coupled neutral amino acid transporter 1	SLC38A1	54 kDa			✓		2		594864			✓
1341	Q96P16	Regulation of nuclear pre-mRNA domain-containing protein 1A	RPRD1A	36 kDa					2		29961.9			✓
1342	P61626	Lysozyme C	LYZ	17 kDa		✓	✓		2		459192			✓
1343	Q53H76	Phospholipase A1 member A	PLA1A	50 kDa	✓	✓			2		2.10088e+07			✓
1344	Q9H2P9	Diphthine methyl ester synthase	DPH5	32 kDa					2		124706			✓
1345	O75818	Ribonuclease P protein subunit p40	RPP40	42 kDa					2		475248			✓
1346	P03951	Coagulation factor XI	F11	70 kDa	✓	✓	✓		2		215450			✓
1347	O75608	Acyl-protein thioesterase 1	LYPLA1	25 kDa			✓		2		123421			✓
1348	Q5R3I4	Tetratricopeptide repeat protein 38	TTC38	53 kDa			✓		2		91047.1			✓
1349	O43447	Peptidyl-prolyl cis-trans isomerase H	PPIH	19 kDa					2		571086			✓
1350	Q16790	Carbonic anhydrase 9	CA9	50 kDa		✓			2		2200434			✓
1351	Q9NY27	Serine/threonine-protein phosphatase 4 regulatory subunit 2	PPP4R2	47 kDa					2		112400			✓
1352	P51571	Translocon-associated protein subunit delta	SSR4	19 kDa		✓	✓		2		875842			✓
1353	Q96GQ7	Probable ATP-dependent RNA helicase DDX27	DDX27	90 kDa					2		593902			✓
1354	Q14574	Desmocollin-3	DSC3	100 kDa		✓			2		206505			✓
1355	P11279	Lysosome-associated membrane glycoprotein 1	LAMP1	45 kDa		✓	✓		2		9.04664e+07			✓
1356	O95801	Tetratricopeptide repeat protein 4	TTC4	45 kDa					2		118597			✓
1357	P30530	Tyrosine-protein kinase receptor UFO	AXL	98 kDa		✓	✓		2		1.92066e+06			✓
1358	Q13428	Treacle protein	TCOF1	152 kDa					2		810435			✓
1359	P00387	NADH-cytochrome b5 reductase 3	CYB5R3	34 kDa					2		1.09116e+06			✓
1360	Q9Y4P3	Transducin beta-like protein 2	TBL2	50 kDa	✓				2		527461			✓
1361	Q14696	LRP chaperone MESD	MESD	26 kDa		✓			2		63618.8			✓
1362	O00187	Mannan-binding lectin serine protease 2	MASP2	76 kDa	✓	✓	✓		2		255429			✓
1363	Q02539	Histone H1.1	H1-1	22 kDa					2		281524			✓
1364	Q9NTJ3	Structural maintenance of chromosomes protein 4	SMC4	147 kDa					2		648980			✓
1365	Q8N9N8	Probable RNA-binding protein EIF1AD	EIF1AD	19 kDa					2		303210			✓
1366	O95163	Elongator complex protein 1	ELP1	150 kDa					2		83688.7			✓
1367	Q9UK59	Lariat debranching enzyme	DBR1	62 kDa					2		313370			✓
1368	P34059	N-acetylgalactosamine-6-sulfatase	GALNS	58 kDa		✓	✓		2		3.08657e+06			✓
1369	Q9BXV9	EKC/KEOPS complex subunit GON7	GON7	11 kDa					1		157109			✓
1370	Q8IZA0	Dyslexia-associated protein KIAA0319-like protein	KIAA0319L	116 kDa					1		184194			✓
1371	Q96FQ6	Protein S100-A16	S100A16	12 kDa			✓		1		1.06049e+06			✓
1372	Q9NXH8	Torsin-4A	TOR4A	47 kDa					1		439156			✓
1373	Q9H3S4	Thiamin pyrophosphokinase 1	TPK1	27 kDa					1		984764			✓
1374	O43866	CD5 antigen-like	CD5L	38 kDa	✓	✓			1		806106			✓
1375	Q9BYZ2	L-lactate dehydrogenase A-like 6B	LDHAL6B	42 kDa					1		171477			✓
1376	Q8N4Q1	Mitochondrial intermembrane space import and assembly protein 40	CHCHD4	16 kDa					1		204860			✓
1377	O60925	Prefoldin subunit 1	PFDN1	14 kDa					1		262783			✓
1378	P30408	Transmembrane 4 L6 family member 1	TM4SF1	22 kDa					1		38430.6			✓
1379	Q96PL1	Secretoglobin family 3A member 2	SCGB3A2	10 kDa	✓	✓			1		1300778			✓
1380	O76071	Probable cytosolic iron-sulfur protein assembly protein CIAO1	CIAO1	38 kDa					1		975731			✓
1381	Q86VM9	Zinc finger CCCH domain-containing protein 18	ZC3H18	106 kDa					1		67599			✓
1382	P80511	Protein S100-A12	S100A12	11 kDa	✓				1		9391555			✓
1383	Q92935	Exostosin-like 1	EXTL1	75 kDa					1		235624			✓
1384	P13073	Cytochrome c oxidase subunit 4 isoform 1, mitochondrial	COX4I1	20 kDa					1		496228			✓
1385	O75554	WW domain-binding protein 4	WBP4	43 kDa					1		32853.6			✓
1386	O43823	A-kinase anchor protein 8	AKAP8	76 kDa					1		71102.4			✓
1387	Q8NC54	Keratinocyte-associated transmembrane protein 2	KCT2	29 kDa		✓			1		1.35739e+06			✓
1388	P78556	C-C motif chemokine 20	CCL20	11 kDa	✓	✓			1		978855			✓
1389	Q96DX5	Ankyrin repeat and SOCS box protein 9	ASB9	32 kDa					1		122062			✓
1390	O15427	Monocarboxylate transporter 4	SLC16A3	49 kDa					1		529605			✓
1391	P47914	60S ribosomal protein L29	RPL29	18 kDa					1		889942			✓
1392	Q9BXD5	N-acetylneuraminate lyase	NPL	35 kDa					1		226899			✓
1393	Q8IZT6	Abnormal spindle-like microcephaly-associated protein	ASPM	410 kDa					1		153019			✓
1394	Q53FA7	Quinone oxidoreductase PIG3	TP53I3	36 kDa					1		782841			✓
1395	Q9Y258	C-C motif chemokine 26	CCL26	11 kDa	✓	✓			1		147937			✓
1396	P49643	DNA primase large subunit	PRIM2	59 kDa					1		109513			✓
1397	Q92597	Protein NDRG1	NDRG1	43 kDa			✓		1		183201			✓
1398	Q14993	Collagen alpha-1(XIX) chain	COL19A1	115 kDa	✓	✓			1		211269			✓
1399	P10145	Interleukin-8	CXCL8	11 kDa	✓	✓			1		670457			✓
1400	O43653	Prostate stem cell antigen	PSCA	12 kDa		✓	✓		1		1.73196e+06			✓
1401	P82970	High mobility group nucleosome-binding domain-containing protein 5	HMGN5	32 kDa					1		290375			✓
1402	Q9Y471	Inactive cytidine monophosphate-N-acetylneuraminic acid hydroxylase	CMAHP	58 kDa					1		Missing Value			✓
1403	Q9HAS0	Protein Njmu-R1	C17orf75	45 kDa					1		35421.1			✓
1404	Q92542	Nicastrin	NCSTN	78 kDa		✓	✓		1		181854			✓
1405	Q494V2	Cilia- and flagella-associated protein 100	CFAP100	71 kDa					1		299004			✓
1406	P04818	Thymidylate synthase	TYMS	36 kDa					1		195037			✓
1407	Q14213	Interleukin-27 subunit beta	EBI3	25 kDa	✓	✓			1		472054			✓
1408	Q17RS7	Flap endonuclease GEN homolog 1	GEN1	103 kDa					1		344216			✓
1409	Q96KB5	Lymphokine-activated killer T-cell-originated protein kinase	PBK	36 kDa					1		1.7988e+06			✓
1410	Q9H910	Jupiter microtubule associated homolog 2	JPT2	20 kDa					1		389876			✓
1411	P78395	Melanoma antigen preferentially expressed in tumors	PRAME	58 kDa					1		1.06727e+06			✓
1412	Q8NEV4	Myosin-IIIa	MYO3A	186 kDa					1		341181			✓
1413	Q96GX9	Methylthioribulose-1-phosphate dehydratase	APIP	27 kDa					1		1797801			✓
1414	O14879	Interferon-induced protein with tetratricopeptide repeats 3	IFIT3	56 kDa					1		101554			✓
1415	Q04837	Single-stranded DNA-binding protein, mitochondrial	SSBP1	17 kDa			✓		1		733530			✓
1416	Q9NUQ3	Gamma-taxilin	TXLNG	61 kDa					1		925163			✓
1417	O95196	Chondroitin sulfate proteoglycan 5	CSPG5	60 kDa		✓			1		158580			✓
1418	Q9NS98	Semaphorin-3G	SEMA3G	87 kDa	✓	✓	✓		1		116198			✓
1419	P14406	Cytochrome c oxidase subunit 7A2, mitochondrial	COX7A2	9 kDa					1		373178			✓
1420	Q9HB21	Pleckstrin homology domain-containing family A member 1	PLEKHA1	46 kDa			✓		1		426299			✓
1421	O00764	Pyridoxal kinase	PDXK	35 kDa			✓		1		241369			✓
1422	Q9Y6I4	Ubiquitin carboxyl-terminal hydrolase 3	USP3	59 kDa					1		68461.1			✓
1423	Q9NW13	RNA-binding protein 28	RBM28	86 kDa					1		76703.6			✓
1424	P55211	Caspase-9	CASP9	46 kDa					1		174809			✓
1425	Q9H8X2	Inositol-pentakisphosphate 2-kinase	IPPK	56 kDa					1		3249600			✓
1426	Q9NRX4	14 kDa phosphohistidine phosphatase	PHPT1	14 kDa			✓		1		72517.8			✓
1427	O94903	Pyridoxal phosphate homeostasis protein	PLPBP	30 kDa					1		242616			✓
1428	Q8TCT8	Signal peptide peptidase-like 2A	SPPL2A	58 kDa			✓		1		Missing Value			✓
1429	P51688	N-sulphoglucosamine sulphohydrolase	SGSH	57 kDa		✓	✓		1		93379.8			✓
1430	Q6ZRI8	Rho GTPase-activating protein 36	ARHGAP36	62 kDa		✓			1		672267			✓
1431	Q8WUR7	UPF0235 protein C15orf40	C15orf40	16 kDa					1		228385			✓
1432	P07360	Complement component C8 gamma chain	C8G	22 kDa	✓	✓	✓		1		95692.8			✓
1433	P50213	Isocitrate dehydrogenase [NAD] subunit alpha, mitochondrial	IDH3A	40 kDa					1		59067.3			✓
1434	Q8N5P1	Zinc finger CCCH domain-containing protein 8	ZC3H8	34 kDa					1		95949.8			✓
1435	Q8TF65	PDZ domain-containing protein GIPC2	GIPC2	34 kDa			✓		1		115455			✓
1436	O60449	Lymphocyte antigen 75	LY75	198 kDa		✓	✓		1		466850			✓
1437	Q9BQ67	Glutamate-rich WD repeat-containing protein 1	GRWD1	49 kDa					1		44088.4			✓
1438	Q92614	Unconventional myosin-XVIIIa	MYO18A	233 kDa					1		79783.7			✓
1439	Q14789	Golgin subfamily B member 1	GOLGB1	376 kDa					1		108684			✓
1440	O95671	Probable bifunctional dTTP/UTP pyrophosphatase/methyltransferase protein	ASMTL	69 kDa					1		4.45574e+06			✓
