# Supplementary material for: A Simple Method for In-Depth Proteome Analysis of Mammalian Cell Culture Conditioned Media Containing Fetal Bovine Serum
Source: Int J Mol Sci. 2021 Mar 4;22(5):2565. doi: 10.3390/ijms22052565 (PMC7961985; doi:10.3390/ijms22052565)
Supplement: Supplementary file 1 [file ijms-22-02565-s001.zip › Supplementary Table S2.xlsx]

## Sheet: Supplementary table 2
Supplementary Table 2. List of human proteins lost by albumin depletion. The results of simultaneously analyzing collected MS data for each treatment by the Scaffold DIA were used. Terms of "Secreted proteins," "Signal peptide," and "Extracellular exosome" were referred to the Human Protein Atlas, UniProt Seq Feature, GO database on PANTHER, respectively.
No	Uniprot Ac.	Protein name	Gene symbol	Molecular Weight	Secreted proteins	Signal peptide	extracellular exosome	# of Peptides
1	P02538	Keratin, type II cytoskeletal 6A	KRT6A	60 kDa			✓	20
2	P15924	Desmoplakin	DSP	332 kDa			✓	17
3	P36871	Phosphoglucomutase-1	PGM1	61 kDa			✓	13
4	P09651	Heterogeneous nuclear ribonucleoprotein A1	HNRNPA1	39 kDa			✓	10
5	P0C0L4	Complement C4-A	C4A	193 kDa	✓	✓	✓	10
6	P22626	Heterogeneous nuclear ribonucleoproteins A2/B1	HNRNPA2B1	37 kDa			✓	9
7	Q04756	Hepatocyte growth factor activator	HGFAC	71 kDa	✓	✓		9
8	P09960	Leukotriene A-4 hydrolase	LTA4H	69 kDa			✓	9
9	Q8IUL8	Cartilage intermediate layer protein 2	CILP2	126 kDa	✓	✓	✓	8
10	P52209	6-phosphogluconate dehydrogenase, decarboxylating	PGD	53 kDa			✓	8
11	O75874	Isocitrate dehydrogenase [NADP] cytoplasmic	IDH1	47 kDa			✓	8
12	P61160	Actin-related protein 2	ACTR2	45 kDa			✓	7
13	P06744	Glucose-6-phosphate isomerase	GPI	63 kDa			✓	7
14	P00533	Epidermal growth factor receptor	EGFR	134 kDa		✓		7
15	P55290	Cadherin-13	CDH13	78 kDa		✓	✓	7
16	P24844	Myosin regulatory light polypeptide 9	MYL9	20 kDa				6
17	P40926	Malate dehydrogenase, mitochondrial	MDH2	36 kDa			✓	6
18	P40925	Malate dehydrogenase, cytoplasmic	MDH1	36 kDa			✓	6
19	P11217	Glycogen phosphorylase, muscle form	PYGM	97 kDa			✓	6
20	P12035	Keratin, type II cytoskeletal 3	KRT3	64 kDa			✓	6
21	Q15555	Microtubule-associated protein RP/EB family member 2	MAPRE2	37 kDa				5
22	Q5D862	Filaggrin-2	FLG2	248 kDa				5
23	P30086	Phosphatidylethanolamine-binding protein 1	PEBP1	21 kDa			✓	5
24	P25787	Proteasome subunit alpha type-2	PSMA2	26 kDa			✓	5
25	O00451	GDNF family receptor alpha-2	GFRA2	52 kDa		✓		5
26	Q6KB66	Keratin, type II cytoskeletal 80	KRT80	51 kDa				5
27	Q8N1N4	Keratin, type II cytoskeletal 78	KRT78	57 kDa			✓	5
28	Q9Y281	Cofilin-2	CFL2	19 kDa			✓	5
29	P37837	Transaldolase	TALDO1	38 kDa			✓	5
30	Q9NPR2	Semaphorin-4B	SEMA4B	93 kDa		✓		5
31	P18065	Insulin-like growth factor-binding protein 2	IGFBP2	35 kDa	✓	✓	✓	5
32	Q9H4A4	Aminopeptidase B	RNPEP	73 kDa	✓		✓	5
33	P18085	ADP-ribosylation factor 4	ARF4	21 kDa			✓	4
34	P19320	Vascular cell adhesion protein 1	VCAM1	81 kDa		✓	✓	4
35	P02750	Leucine-rich alpha-2-glycoprotein	LRG1	38 kDa	✓	✓	✓	3
36	Q5T749	Keratinocyte proline-rich protein	KPRP	64 kDa			✓	3
37	Q14019	Coactosin-like protein	COTL1	16 kDa			✓	3
38	O75223	Gamma-glutamylcyclotransferase	GGCT	21 kDa			✓	3
39	Q99650	Oncostatin-M-specific receptor subunit beta	OSMR	111 kDa		✓		3
40	P61916	NPC intracellular cholesterol transporter 2	NPC2	17 kDa	✓	✓	✓	3
41	Q03167	Transforming growth factor beta receptor type 3	TGFBR3	94 kDa		✓	✓	3
42	Q04760	Lactoylglutathione lyase	GLO1	21 kDa			✓	3
43	P35030	Trypsin-3	PRSS3	33 kDa	✓	✓		3
44	P42357	Histidine ammonia-lyase	HAL	73 kDa				3
45	P78417	Glutathione S-transferase omega-1	GSTO1	28 kDa			✓	3
46	P36952	Serpin B5	SERPINB5	42 kDa				3
47	P09211	Glutathione S-transferase P	GSTP1	23 kDa			✓	3
48	P05546	Heparin cofactor 2	SERPIND1	57 kDa	✓	✓	✓	3
49	P35900	Keratin, type I cytoskeletal 20	KRT20	48 kDa				3
50	Q9BY67	Cell adhesion molecule 1	CADM1	49 kDa		✓		2
51	Q08554	Desmocollin-1	DSC1	100 kDa		✓	✓	2
52	P25311	Zinc-alpha-2-glycoprotein	AZGP1	34 kDa	✓	✓	✓	2
53	Q9P0S2	Cytochrome c oxidase assembly protein COX16 homolog, mitochondrial	COX16	12 kDa				2
54	Q9BRA2	Thioredoxin domain-containing protein 17	TXNDC17	14 kDa			✓	2
55	Q14126	Desmoglein-2	DSG2	122 kDa		✓	✓	2
56	P23490	Loricrin	LORICRIN	26 kDa				2
57	P33151	Cadherin-5	CDH5	88 kDa		✓		2
58	Q8NFT8	Delta and Notch-like epidermal growth factor-related receptor	DNER	78 kDa		✓		2
59	P04278	Sex hormone-binding globulin	SHBG	44 kDa	✓	✓	✓	2
60	P20930	Filaggrin	FLG	435 kDa				2
61	P07108	Acyl-CoA-binding protein	DBI	10 kDa			✓	2
62	Q08188	Protein-glutamine gamma-glutamyltransferase E	TGM3	77 kDa			✓	2
63	P02787	Serotransferrin	TF	77 kDa	✓	✓	✓	2
64	P54819	Adenylate kinase 2, mitochondrial	AK2	26 kDa			✓	2
65	Q9BUD6	Spondin-2	SPON2	36 kDa	✓	✓	✓	2
66	P01241	Somatotropin	GH1	25 kDa	✓	✓		1
67	P15151	Poliovirus receptor	PVR	45 kDa		✓		1
68	Q9UHY7	Enolase-phosphatase E1	ENOPH1	29 kDa				1
69	P17900	Ganglioside GM2 activator	GM2A	21 kDa		✓	✓	1
70	P99999	Cytochrome c	CYCS	12 kDa				1
71	Q01459	Di-N-acetylchitobiase	CTBS	44 kDa		✓		1
72	Q9UGM3	Deleted in malignant brain tumors 1 protein	DMBT1	261 kDa	✓	✓	✓	1
73	P04080	Cystatin-B	CSTB	11 kDa			✓	1
74	Q9H3T3	Semaphorin-6B	SEMA6B	95 kDa		✓		1
75	O95498	Vascular non-inflammatory molecule 2	VNN2	59 kDa		✓		1
76	Q8WZ75	Roundabout homolog 4	ROBO4	107 kDa		✓	✓	1
77	Q5S007	Leucine-rich repeat serine/threonine-protein kinase 2	LRRK2	286 kDa			✓	1
78	Q9UJC5	SH3 domain-binding glutamic acid-rich-like protein 2	SH3BGRL2	12 kDa				1
79	Q6UW88	Epigen	EPGN	17 kDa		✓		1
80	Q8N884	Cyclic GMP-AMP synthase	CGAS	59 kDa				1
81	Q9Y5Z9	UbiA prenyltransferase domain-containing protein 1	UBIAD1	37 kDa				1
82	O15204	ADAM DEC1	ADAMDEC1	53 kDa	✓	✓		1
83	A9QM74	Importin subunit alpha-8	KPNA7	57 kDa				1
84	Q8WZ42	Titin	TTN	3816 kDa			✓	1
85	P02766	Transthyretin	TTR	16 kDa	✓	✓	✓	1
86	Q6IE36	Ovostatin homolog 2	OVOS2	161 kDa		✓		1
87	Q8IVM8	Solute carrier family 22 member 9	SLC22A9	62 kDa				1
88	Q96Q89	Kinesin-like protein KIF20B	KIF20B	211 kDa				1
89	P28332	Alcohol dehydrogenase 6	ADH6	39 kDa			✓	1
90	A0A075B6W5	T cell receptor alpha variable 23/delta variable 6	TRAV23DV6	14 kDa				1
91	Q9UNN8	Endothelial protein C receptor	PROCR	27 kDa		✓	✓	1
92	Q5T0F9	Coiled-coil and C2 domain-containing protein 1B	CC2D1B	94 kDa				1
93	Q9Y3C4	EKC/KEOPS complex subunit TPRKB	TPRKB	20 kDa				1
94	P16083	Ribosyldihydronicotinamide dehydrogenase [quinone]	NQO2	26 kDa			✓	1
95	Q8WTU0	Protein DDI1 homolog 1	DDI1	44 kDa				1
