# Supplementary material for: A Simple Method for In-Depth Proteome Analysis of Mammalian Cell Culture Conditioned Media Containing Fetal Bovine Serum
Source: Int J Mol Sci. 2021 Mar 4;22(5):2565. doi: 10.3390/ijms22052565 (PMC7961985; doi:10.3390/ijms22052565)
Supplement: Supplementary file 1 [file ijms-22-02565-s001.zip › Supplementary Table S3.xlsx]

## Sheet: Supplementary table 3
Supplementary Table 3. List of human proteins observed in albumin-depleted supernatants (sup) of HeLa cells in 10, 5, and 2 mL of medium containing 10% FBS. The results of simultaneously analyzing collected MS data for each treatment by the Scaffold DIA were used. Terms of "Secreted proteins," "Signal peptide," and "Extracellular exosome" were referred to the Human Protein Atlas, UniProt Seq Feat…
No	Uniprot Ac.	Protein name	Gene symbol	Molecular Weight	Secreted proteins	Signal peptide	extracellular exosome	10 mL Sup. # of Peptides	5 mL Sup. # of Peptides	2 mL Sup. # of Peptides	10 mL Sup. Intensity	5 mL Sup. Intensity	2 mL Sup. Intensity
1	Q15149	Plectin	PLEC	532 kDa			✓	48	134	147	35114430	160981600	290633100
2	Q14204	Cytoplasmic dynein 1 heavy chain 1	DYNC1H1	532 kDa			✓	75	106	114	935442	1.69095e+07	2.70744e+07
3	Q13813	Spectrin alpha chain, non-erythrocytic 1	SPTAN1	285 kDa			✓	74	91	101	3.89681e+06	5.11351e+07	74812950
4	P98160	Basement membrane-specific heparan sulfate proteoglycan core protein	HSPG2	469 kDa	✓	✓	✓	85	92	93	2.82041e+08	539796200	4.62723e+08
5	Q01082	Spectrin beta chain, non-erythrocytic 1	SPTBN1	275 kDa			✓	52	77	84	1.72859e+06	23660950	5.11093e+07
6	O75369	Filamin-B	FLNB	278 kDa			✓	53	73	82	1.34048e+07	160609600	301159000
7	P46013	Proliferation marker protein Ki-67	MKI67	359 kDa				23	74	82	1.22547e+07	212101100	3.24221e+08
8	P21333	Filamin-A	FLNA	281 kDa			✓	66	76	81	7.45888e+07	2.23597e+08	4.46271e+08
9	Q5T4S7	E3 ubiquitin-protein ligase UBR4	UBR4	574 kDa				20	55	79	2.20173e+06	5.78345e+07	1.07765e+08
10	Q09666	Neuroblast differentiation-associated protein AHNAK	AHNAK	629 kDa			✓	14	69	79		3.67969e+07	18342310
11	Q99715	Collagen alpha-1(XII) chain	COL12A1	333 kDa		✓	✓	67	73	74	1.2659e+08	3.42384e+08	3.55298e+08
12	P49327	Fatty acid synthase	FASN	273 kDa			✓	47	67	72	4.98573e+07	5.99423e+08	1104780000
13	Q07954	Prolow-density lipoprotein receptor-related protein 1	LRP1	505 kDa		✓		69	72	71	1.50613e+08	3.43058e+08	3.34179e+08
14	O15230	Laminin subunit alpha-5	LAMA5	400 kDa		✓	✓	57	70	71	7.29769e+07	6.86733e+07	7.30553e+07
15	Q7Z6Z7	E3 ubiquitin-protein ligase HUWE1	HUWE1	482 kDa			✓	17	59	71	65026.1	3176043	7.01736e+06
16	Q9UPN3	Microtubule-actin cross-linking factor 1, isoforms 1/2/3/5	MACF1	838 kDa				6	48	71		3.76437e+06	1.06802e+07
17	O75643	U5 small nuclear ribonucleoprotein 200 kDa helicase	SNRNP200	245 kDa				20	59	69	6.17472e+06	1.47439e+08	2.80904e+08
18	Q9Y490	Talin-1	TLN1	270 kDa	✓		✓	62	68	66	8.27849e+08	2.08876e+09	1.66538e+09
19	P01024	Complement C3	C3	187 kDa		✓	✓	55	67	66	9271411	23540310	8.80689e+06
20	Q14517	Protocadherin Fat 1	FAT1	506 kDa		✓	✓	47	63	65	2.45639e+07	63060090	8.52338e+07
21	P35579	Myosin-9	MYH9	227 kDa			✓	52	61	63	1.09996e+06	13386060	20170790
22	P78527	DNA-dependent protein kinase catalytic subunit	PRKDC	469 kDa	✓			5	54	61	573776	2.32107e+07	56017230
23	P10586	Receptor-type tyrosine-protein phosphatase F	PTPRF	213 kDa		✓	✓	32	45	50	2.7685e+07	9.55055e+07	190338300
24	Q14980	Nuclear mitotic apparatus protein 1	NUMA1	238 kDa			✓	8	47	50	1905436	4.6202e+07	1.00256e+08
25	P46940	Ras GTPase-activating-like protein IQGAP1	IQGAP1	189 kDa			✓	33	44	49	12627410	1.05668e+08	148786900
26	P49792	E3 SUMO-protein ligase RanBP2	RANBP2	358 kDa				3	45	49	478412	27172680	4.53943e+07
27	P12270	Nucleoprotein TPR	TPR	267 kDa				12	44	48	3.28027e+06	9.62063e+07	1.82112e+08
28	Q86UP2	Kinectin	KTN1	156 kDa				19	43	47	2207753	4.72129e+07	102643490
29	Q6P2Q9	Pre-mRNA-processing-splicing factor 8	PRPF8	274 kDa				10	36	47		4.67289e+07	75021990
30	O43707	Alpha-actinin-4	ACTN4	105 kDa	✓		✓	43	46	46	6.77756e+07	6.13637e+08	1047465000
31	P12814	Alpha-actinin-1	ACTN1	103 kDa			✓	39	46	46	7.31708e+07	2.45399e+08	4.54846e+08
32	Q6UVK1	Chondroitin sulfate proteoglycan 4	CSPG4	251 kDa	✓	✓	✓	37	43	46	2.15887e+06	43937490	8.47708e+07
33	Q14008	Cytoskeleton-associated protein 5	CKAP5	226 kDa				31	48	46	200946	1.58172e+07	3.14203e+07
34	P07814	Bifunctional glutamate/proline--tRNA ligase	EPRS1	171 kDa				28	43	45	9.51423e+06	83963300	1.49903e+08
35	P07996	Thrombospondin-1	THBS1	129 kDa		✓	✓	41	42	43	1.28036e+08	1.5613e+08	1.47304e+08
36	P31327	Carbamoyl-phosphate synthase [ammonia], mitochondrial	CPS1	165 kDa	✓			33	43	43	2.61541e+08	365929800	2.44053e+08
37	P11717	Cation-independent mannose-6-phosphate receptor	IGF2R	274 kDa		✓	✓	29	39	43	3.64788e+07	394645300	6.84339e+08
38	Q14789	Golgin subfamily B member 1	GOLGB1	376 kDa				1	31	43	108684	1.73606e+07	3.13412e+07
39	Q93008	Probable ubiquitin carboxyl-terminal hydrolase FAF-X	USP9X	292 kDa				18	31	42	156183	1.33988e+07	2.4633e+07
40	O75116	Rho-associated protein kinase 2	ROCK2	161 kDa				14	35	42		4.94757e+07	9.12971e+07
41	Q9UQE7	Structural maintenance of chromosomes protein 3	SMC3	142 kDa				6	31	42		24247270	1.89102e+07
42	Q03001	Dystonin	DST	861 kDa				0	26	41		4225749	10299840
43	P01023	Alpha-2-macroglobulin	A2M	163 kDa		✓	✓	38	42	40	9.11195e+07	2.22799e+08	215805800
44	P11940	Polyadenylate-binding protein 1	PABPC1	71 kDa			✓	28	19	40		2.60407e+08
45	Q16787	Laminin subunit alpha-3	LAMA3	367 kDa	✓	✓	✓	23	36	39	1.37519e+07	2.55426e+07	30445530
46	Q15075	Early endosome antigen 1	EEA1	162 kDa			✓	13	31	39	1.11503e+06	3.01366e+07	6.36346e+07
47	Q07157	Tight junction protein ZO-1	TJP1	195 kDa				5	33	39	1.07714e+06	2.8587e+07	4.73141e+07
48	Q9Y520	Protein PRRC2C	PRRC2C	317 kDa				4	35	39	65855.4	4.62725e+06	21737110
49	Q5VYK3	Proteasome adapter and scaffold protein ECM29	ECPAS	204 kDa				0	38	39		6236397	8.95704e+07
50	P78509	Reelin	RELN	388 kDa	✓	✓		38	37	38	1.15936e+07	8.9573e+06	11600390
51	Q08211	ATP-dependent RNA helicase A	DHX9	141 kDa	✓			21	36	38	2.49558e+07	323428700	1.1641e+08
52	Q14152	Eukaryotic translation initiation factor 3 subunit A	EIF3A	167 kDa				16	35	38	1.37314e+07	1.8567e+08	2.96717e+08
53	P11388	DNA topoisomerase 2-alpha	TOP2A	174 kDa				15	35	38	7.63069e+06	72760150	1.24228e+08
54	Q14203	Dynactin subunit 1	DCTN1	142 kDa				14	25	38	1395211	3.87374e+07	5.11676e+07
55	Q14839	Chromodomain-helicase-DNA-binding protein 4	CHD4	218 kDa				9	33	38	2.47101e+06	5.6034e+07	1.09603e+08
56	O60841	Eukaryotic translation initiation factor 5B	EIF5B	139 kDa				9	30	38	1219297	2.3576e+07	45147960
57	Q08378	Golgin subfamily A member 3	GOLGA3	167 kDa				0	27	38		10374364	2.52958e+07
58	P42704	Leucine-rich PPR motif-containing protein, mitochondrial	LRPPRC	158 kDa				6	33	37	655135	26594180	4.96698e+07
59	Q13085	Acetyl-CoA carboxylase 1	ACACA	266 kDa				0	31	37		1.01227e+07	6.79561e+06
60	O00468	Agrin	AGRN	217 kDa		✓	✓	36	38	36	2.22785e+08	4.75e+08	4.18599e+08
61	P41252	Isoleucine--tRNA ligase, cytoplasmic	IARS1	145 kDa			✓	15	32	36	4.15054e+06	104416440	1.81096e+08
62	Q8TEQ6	Gem-associated protein 5	GEMIN5	169 kDa				3	24	36	1.35441e+06	3.5248e+07	8.38639e+07
63	Q92616	eIF-2-alpha kinase activator GCN1	GCN1	293 kDa				0	0	36			2.17524e+06
64	P18206	Vinculin	VCL	124 kDa	✓		✓	34	36	35	1.72586e+06	56905710	58590620
65	P13639	Elongation factor 2	EEF2	95 kDa			✓	31	35	35	8.53366e+07	202139300	2.21794e+08
66	P08603	Complement factor H	CFH	139 kDa		✓	✓	26	34	35	1.18533e+06	3773327	8709133
67	P50851	Lipopolysaccharide-responsive and beige-like anchor protein	LRBA	319 kDa				15	27	35	381219	3.91893e+06	4938392
68	P07942	Laminin subunit beta-1	LAMB1	198 kDa	✓	✓	✓	32	33	34	4.91857e+07	119889100	8.32589e+07
69	P35556	Fibrillin-2	FBN2	315 kDa	✓	✓		31	33	34	4.94699e+08	1848791000	2.58357e+09
70	P07900	Heat shock protein HSP 90-alpha	HSP90AA1	85 kDa			✓	28	34	34	4.30841e+06	38287740	75276870
71	P53396	ATP-citrate synthase	ACLY	121 kDa			✓	24	30	34	4223250	2919737	2.9748e+06
72	P53621	Coatomer subunit alpha	COPA	138 kDa			✓	17	33	34	2.03792e+06	2.99815e+07	4.64772e+07
73	P30622	CAP-Gly domain-containing linker protein 1	CLIP1	162 kDa				12	32	34	63006.2	1.45553e+07	2.9013e+07
74	Q7KZ85	Transcription elongation factor SPT6	SUPT6H	199 kDa				4	31	34		469111000	919141400
75	P08238	Heat shock protein HSP 90-beta	HSP90AB1	83 kDa			✓	0	33	34		4.21903e+07	4.70566e+07
76	Q9Y4G6	Talin-2	TLN2	272 kDa				0	26	34		1.58304e+07	9829350
77	Q7L576	Cytoplasmic FMR1-interacting protein 1	CYFIP1	145 kDa			✓	0	30	34		2683772	4.5717e+06
78	P02751	Fibronectin	FN1	272 kDa		✓	✓	31	34	33	2.10742e+07	2.84274e+08	5.35312e+08
79	P09874	Poly [ADP-ribose] polymerase 1	PARP1	113 kDa				19	33	33	871399	3.677e+07	7.70793e+07
80	Q15393	Splicing factor 3B subunit 3	SF3B3	136 kDa				14	34	33	1.43992e+06	1.53165e+06	903603
81	P26358	DNA (cytosine-5)-methyltransferase 1	DNMT1	183 kDa				3	27	33		2.32899e+08	438628500
82	P35555	Fibrillin-1	FBN1	312 kDa		✓		31	32	32	874729	130328	892257
83	Q6V0I7	Protocadherin Fat 4	FAT4	543 kDa		✓	✓	30	33	32	12178620	69310170	1.30589e+08
84	Q9Y5B9	FACT complex subunit SPT16	SUPT16H	120 kDa				26	30	32	1.50395e+07	2.77469e+07	2.81046e+08
85	Q16531	DNA damage-binding protein 1	DDB1	127 kDa			✓	26	31	32	8.06658e+06	1.42183e+07	10038837
86	Q14566	DNA replication licensing factor MCM6	MCM6	93 kDa				18	28	32	510821	3.50459e+07	80795870
87	Q01970	1-phosphatidylinositol 4,5-bisphosphate phosphodiesterase beta-3	PLCB3	139 kDa				16	31	32		1.90338e+08	450631800
88	Q04637	Eukaryotic translation initiation factor 4 gamma 1	EIF4G1	175 kDa	✓			15	27	32		3.26298e+07	74946640
89	Q9UQ35	Serine/arginine repetitive matrix protein 2	SRRM2	300 kDa				0	24	32			8.31825e+08
90	P55786	Puromycin-sensitive aminopeptidase	NPEPPS	103 kDa			✓	28	32	31	4052323	9.49908e+07	2277951000
91	P55072	Transitional endoplasmic reticulum ATPase	VCP	89 kDa			✓	23	28	31	7.80206e+06	2.26624e+07	19271780
92	Q13200	26S proteasome non-ATPase regulatory subunit 2	PSMD2	100 kDa			✓	22	30	31	245472	2.00816e+07	1.15863e+08
93	P02545	Prelamin-A/C	LMNA	74 kDa				21	28	31	2486943	35020000	4.14703e+07
94	Q4LDE5	Sushi, von Willebrand factor type A, EGF and pentraxin domain-containing protein 1	SVEP1	390 kDa		✓		20	32	31	6856968	11393210	101048210
95	O60610	Protein diaphanous homolog 1	DIAPH1	141 kDa	✓			19	30	31	3.32629e+06	2.26743e+07	56503440
96	Q13619	Cullin-4A	CUL4A	88 kDa				18	29	31	8.64784e+06	1.34908e+08	266527900
97	Q9P2J5	Leucine--tRNA ligase, cytoplasmic	LARS1	134 kDa				15	29	31	3581208	6.77208e+07	104738500
98	P29144	Tripeptidyl-peptidase 2	TPP2	138 kDa				12	24	31	459855	29935530	4.80842e+07
99	Q15029	116 kDa U5 small nuclear ribonucleoprotein component	EFTUD2	109 kDa				11	31	31	272509	1.24135e+07	7.12057e+07
100	Q9P2E9	Ribosome-binding protein 1	RRBP1	152 kDa				10	29	31		1.24371e+08	212809900
101	O60437	Periplakin	PPL	205 kDa			✓	0	17	31		5.6829e+06	15007190
102	Q02880	DNA topoisomerase 2-beta	TOP2B	183 kDa				0	24	31		7.52754e+06	17768700
103	P35573	Glycogen debranching enzyme	AGL	175 kDa				0	28	31		8.38042e+06	1.46779e+07
104	Q14315	Filamin-C	FLNC	291 kDa				31	28	30	5.01125e+06	2.92575e+07	4.1739e+07
105	P24043	Laminin subunit alpha-2	LAMA2	344 kDa		✓		28	26	30	8.21487e+07	163928300	253422800
106	O14980	Exportin-1	XPO1	123 kDa				25	30	30	173151	2.81512e+06	6.89017e+06
107	Q13332	Receptor-type tyrosine-protein phosphatase S	PTPRS	217 kDa	✓	✓	✓	23	27	30	7.37404e+06	1.26698e+08	3.27108e+08
108	Q86VP6	Cullin-associated NEDD8-dissociated protein 1	CAND1	136 kDa			✓	23	30	30	14629330	1.02717e+07	1.0264e+07
109	P26639	Threonine--tRNA ligase 1, cytoplasmic	TARS1	83 kDa			✓	18	27	30	1.04152e+06	3.69716e+06	5.72116e+06
110	Q13464	Rho-associated protein kinase 1	ROCK1	158 kDa				14	25	30	900674	790210	187046
111	O94915	Protein furry homolog-like	FRYL	340 kDa				6	21	30	125727	1.22263e+07	1.91877e+07
112	Q9Y5S2	Serine/threonine-protein kinase MRCK beta	CDC42BPB	194 kDa	✓		✓	4	25	30		9.34519e+06	1.22243e+07
113	P33176	Kinesin-1 heavy chain	KIF5B	110 kDa				0	27	30		1.07424e+07	1.735e+07
114	P42858	Huntingtin	HTT	348 kDa				0	17	30		1375841	3809058
115	Q9UPU5	Ubiquitin carboxyl-terminal hydrolase 24	USP24	294 kDa				0	21	30		1731056	3.52801e+06
116	P23468	Receptor-type tyrosine-protein phosphatase delta	PTPRD	215 kDa		✓	✓	28	27	29	3.21657e+07	93550330	8.45232e+07
117	Q92896	Golgi apparatus protein 1	GLG1	135 kDa		✓	✓	25	28	29	6578843	13723670	16296780
118	P11047	Laminin subunit gamma-1	LAMC1	178 kDa	✓	✓	✓	24	29	29	5.60224e+07	71821250	8.78185e+07
119	Q7KZF4	Staphylococcal nuclease domain-containing protein 1	SND1	102 kDa	✓		✓	20	30	29	32257350	1.04599e+07	2.4229e+08
120	Q13620	Cullin-4B	CUL4B	104 kDa			✓	18	24	29	5923699	2.46851e+07	3.74628e+07
121	Q92598	Heat shock protein 105 kDa	HSPH1	97 kDa			✓	18	28	29	285500	1.04309e+07	2.3183e+07
122	Q9ULT8	E3 ubiquitin-protein ligase HECTD1	HECTD1	289 kDa				12	24	29	8507539	8.14921e+07	2.07291e+08
123	Q9H2G2	STE20-like serine/threonine-protein kinase	SLK	143 kDa			✓	9	24	29	717042	21034570	3.99615e+07
124	Q9BQG0	Myb-binding protein 1A	MYBBP1A	149 kDa				5	24	29	79783.7	3.91769e+06	8.54465e+06
125	Q92614	Unconventional myosin-XVIIIa	MYO18A	233 kDa				1	23	29		8751127	1.93637e+07
126	A0AVT1	Ubiquitin-like modifier-activating enzyme 6	UBA6	118 kDa				0	26	29		9.27861e+06	1.40979e+07
127	P15924	Desmoplakin	DSP	332 kDa			✓	0	19	29		6250673	1.08867e+07
128	P55060	Exportin-2	CSE1L	110 kDa	✓		✓	24	27	28	2.85063e+07	9.67136e+07	1.09293e+08
129	P50990	T-complex protein 1 subunit theta	CCT8	60 kDa	✓		✓	23	26	28	1.74971e+07	1.96202e+08	4.02404e+08
130	P34932	Heat shock 70 kDa protein 4	HSPA4	94 kDa			✓	22	27	28	1.05754e+07	2.52486e+08	2.56793e+08
131	P26640	Valine--tRNA ligase	VARS1	140 kDa				20	28	28	6884399	86002670	154572900
132	P11586	C-1-tetrahydrofolate synthase, cytoplasmic	MTHFD1	102 kDa			✓	18	27	28	1.00131e+07	1.91626e+07	27037510
133	Q9Y678	Coatomer subunit gamma-1	COPG1	98 kDa				17	28	28	3.53567e+06	27674450	3.65111e+07
134	Q9BXJ9	N-alpha-acetyltransferase 15, NatA auxiliary subunit	NAA15	101 kDa				14	29	28	579121	14439500	1.54338e+07
135	Q14C86	GTPase-activating protein and VPS9 domain-containing protein 1	GAPVD1	165 kDa				11	23	28	300115	3.15448e+06	6.26605e+06
136	O60271	C-Jun-amino-terminal kinase-interacting protein 4	SPAG9	146 kDa			✓	10	26	28	5350420	8.51498e+07	3.4516e+07
137	O43847	Nardilysin	NRDC	132 kDa		✓		10	24	28	734628	40823240	7.90449e+07
138	Q13045	Protein flightless-1 homolog	FLII	145 kDa				9	26	28	78681.2	1.25842e+07	1.96785e+07
139	Q9NSE4	Isoleucine--tRNA ligase, mitochondrial	IARS2	114 kDa	✓			6	23	28		9.97525e+07	116915900
140	Q709C8	Vacuolar protein sorting-associated protein 13C	VPS13C	422 kDa			✓	0	24	28		3956364	9814092
141	Q9NZM1	Myoferlin	MYOF	235 kDa			✓	0	13	28		3.29761e+06	16705950
142	P32004	Neural cell adhesion molecule L1	L1CAM	140 kDa		✓		22	25	27	2.46342e+08	5.84254e+08	6.1259e+08
143	Q93009	Ubiquitin carboxyl-terminal hydrolase 7	USP7	128 kDa				22	24	27	7922074	61509490	200642000
144	P50395	Rab GDP dissociation inhibitor beta	GDI2	51 kDa	✓		✓	21	25	27	139966	9.14662e+06	9.55169e+06
145	P53618	Coatomer subunit beta	COPB1	107 kDa	✓			17	27	27	8000560	4.51531e+07	5.90644e+07
146	Q92900	Regulator of nonsense transcripts 1	UPF1	124 kDa				16	24	27		4833097	6.41153e+06
147	Q7L014	Probable ATP-dependent RNA helicase DDX46	DDX46	117 kDa				10	25	27		49562840	1.01034e+08
148	Q9NVI1	Fanconi anemia group I protein	FANCI	149 kDa				0	19	27		4459668	1.06653e+07
149	Q13617	Cullin-2	CUL2	87 kDa				0	24	27		4.64841e+06	5.0059e+06
150	O60568	Multifunctional procollagen lysine hydroxylase and glycosyltransferase LH3	PLOD3	85 kDa		✓	✓	21	26	26	25730050	7.63999e+07	80435310
151	Q02388	Collagen alpha-1(VII) chain	COL7A1	295 kDa	✓	✓		21	28	26	5.31294e+06	5.13677e+07	101607580
152	P08670	Vimentin	VIM	54 kDa			✓	19	25	26	1.1764e+07	9.03461e+07	1.57525e+08
153	Q12906	Interleukin enhancer-binding factor 3	ILF3	95 kDa				18	26	26	1.63332e+07	3.00839e+08	4.73758e+08
154	P22314	Ubiquitin-like modifier-activating enzyme 1	UBA1	118 kDa			✓	18	24	26	23320850	66251520	6.6181e+07
155	P05787	Keratin, type II cytoskeletal 8	KRT8	54 kDa			✓	18	25	26	1.10146e+07	5.21189e+07	7.91649e+07
156	P63010	AP-2 complex subunit beta	AP2B1	105 kDa				17	23	26	5.89509e+06	4913501	5.76617e+07
157	P49736	DNA replication licensing factor MCM2	MCM2	102 kDa	✓			17	25	26	2.01373e+07	230423900	4.68121e+08
158	P47897	Glutamine--tRNA ligase	QARS1	88 kDa	✓			15	23	26	34088140	2.60087e+08	312748700
159	P14735	Insulin-degrading enzyme	IDE	118 kDa			✓	15	25	26	3.44719e+06	4.46596e+07	79162600
160	Q9HCU4	Cadherin EGF LAG seven-pass G-type receptor 2	CELSR2	317 kDa		✓		14	26	26	2.85176e+06	8.7336e+06	7.5759e+06
161	P20700	Lamin-B1	LMNB1	66 kDa				11	25	26	Missing Value	7.31589e+06	7.71267e+07
162	Q00341	Vigilin	HDLBP	141 kDa				0	23	26		2.04891e+07	5.07855e+07
163	O00429	Dynamin-1-like protein	DNM1L	82 kDa				22	24	25	38572820	159803900	1.58348e+08
164	Q02809	Procollagen-lysine,2-oxoglutarate 5-dioxygenase 1	PLOD1	84 kDa		✓	✓	21	25	25	1.64142e+07	1.4792e+08	273998000
165	P49588	Alanine--tRNA ligase, cytoplasmic	AARS1	107 kDa			✓	21	26	25	3.29209e+07	86691930	8.65596e+07
166	P17987	T-complex protein 1 subunit alpha	TCP1	60 kDa	✓		✓	19	23	25	1.03204e+07	1.69284e+08	1.87207e+08
167	P33992	DNA replication licensing factor MCM5	MCM5	82 kDa				19	25	25	8.23498e+06	60070300	8.74308e+07
168	Q92841	Probable ATP-dependent RNA helicase DDX17	DDX17	80 kDa				18	23	25	5.64109e+06	9.87208e+07	126862100
169	P06737	Glycogen phosphorylase, liver form	PYGL	97 kDa			✓	17	25	25	1.92665e+07	1.83996e+08	3.34725e+08
170	Q92499	ATP-dependent RNA helicase DDX1	DDX1	82 kDa				16	24	25	53303.1	8.71108e+06	1.80309e+07
171	O95782	AP-2 complex subunit alpha-1	AP2A1	108 kDa				16	26	25	7.87479e+06	4.10764e+07	61589780
172	O75153	Clustered mitochondria protein homolog	CLUH	147 kDa				10	22	25	3.61067e+06	3.4783e+07	7.61549e+07
173	A5YKK6	CCR4-NOT transcription complex subunit 1	CNOT1	267 kDa				10	28	25	9.07223e+06	220919800	2.9252e+08
174	P25205	DNA replication licensing factor MCM3	MCM3	91 kDa				9	24	25	511888	15007160	3.10971e+07
175	O95757	Heat shock 70 kDa protein 4L	HSPA4L	95 kDa				9	23	25	1770621	31326050	5.58203e+07
176	Q9HAV4	Exportin-5	XPO5	136 kDa				8	23	25	475874	2.52473e+07	1.07696e+08
177	O60264	SWI/SNF-related matrix-associated actin-dependent regulator of chromatin subfamily A member 5	SMARCA5	122 kDa				7	25	25	2700911	6.02135e+07	100329610
178	Q7Z2W4	Zinc finger CCCH-type antiviral protein 1	ZC3HAV1	101 kDa	✓			6	20	25		9334425	2.06287e+07
179	P30876	DNA-directed RNA polymerase II subunit RPB2	POLR2B	134 kDa				0	17	25		7471936	2.09327e+07
180	O60313	Dynamin-like 120 kDa protein, mitochondrial	OPA1	112 kDa				0	19	25		1805770	3.69038e+06
181	O95347	Structural maintenance of chromosomes protein 2	SMC2	136 kDa			✓	0	18	25		11790510	1.3018e+07
182	Q6P158	Putative ATP-dependent RNA helicase DHX57	DHX57	156 kDa				0	19	25		5.80106e+06	1.68387e+07
183	P26038	Moesin	MSN	68 kDa			✓	0	0	25			160966
184	P13497	Bone morphogenetic protein 1	BMP1	111 kDa		✓		24	25	24	10345810	2.32997e+07	26987790
185	P13797	Plastin-3	PLS3	71 kDa				22	23	24	541630	1.22199e+07	20632730
186	Q96QK1	Vacuolar protein sorting-associated protein 35	VPS35	92 kDa			✓	21	25	24	1.04572e+06	21649340	4.06744e+07
187	P0C0L5	Complement C4-B	C4B	193 kDa		✓	✓	19	26	24	3.54884e+06	6.20653e+07	1.20496e+08
188	O00410	Importin-5	IPO5	124 kDa				19	24	24	7215340	125093900	2.20363e+08
189	Q99460	26S proteasome non-ATPase regulatory subunit 1	PSMD1	106 kDa				18	23	24	1.14382e+09	7.1396e+08	1.81685e+09
190	P49915	GMP synthase [glutamine-hydrolyzing]	GMPS	77 kDa				17	23	24	2.51773e+06	2.40001e+07	5.45291e+07
191	Q92973	Transportin-1	TNPO1	102 kDa			✓	17	22	24	2.42178e+06	21813470	5.0025e+07
192	P55884	Eukaryotic translation initiation factor 3 subunit B	EIF3B	92 kDa			✓	16	23	24	8338328	9.99529e+07	1.26766e+07
193	Q99613	Eukaryotic translation initiation factor 3 subunit C	EIF3C	105 kDa				14	23	24	527618	1.03853e+07	12520130
194	O94973	AP-2 complex subunit alpha-2	AP2A2	104 kDa				12	22	24	1.35318e+06	8.9132e+06	28959550
195	P54136	Arginine--tRNA ligase, cytoplasmic	RARS1	75 kDa	✓		✓	10	25	24	1642480	3854779	2.57154e+07
196	P33991	DNA replication licensing factor MCM4	MCM4	97 kDa				10	23	24	174112	29335020	5.01607e+07
197	P08133	Annexin A6	ANXA6	76 kDa			✓	10	20	24	1.33623e+06	9.80382e+06	18166180
198	Q92621	Nuclear pore complex protein Nup205	NUP205	228 kDa				6	17	24	810435	1.97464e+07	2.80248e+07
199	O00267	Transcription elongation factor SPT5	SUPT5H	121 kDa				4	21	24	648980	1.19124e+07	2.15103e+07
200	Q13428	Treacle protein	TCOF1	152 kDa				2	19	24		108916700	1.71995e+08
201	Q9NTJ3	Structural maintenance of chromosomes protein 4	SMC4	147 kDa				2	17	24		2.24338e+07	3.09457e+07
202	Q8TAQ2	SWI/SNF complex subunit SMARCC2	SMARCC2	133 kDa				2	16	24		2.09801e+07	3.95359e+07
203	Q8WWI1	LIM domain only protein 7	LMO7	193 kDa				0	21	24		126059	1.37676e+06
204	O75717	WD repeat and HMG-box DNA-binding protein 1	WDHD1	126 kDa				0	22	24		5.54108e+06	16141710
205	Q14974	Importin subunit beta-1	KPNB1	97 kDa			✓	0	22	24		7174277	12254400
206	P50748	Kinetochore-associated protein 1	KNTC1	251 kDa				0	14	24		2.36697e+06	9397359
207	Q7L2E3	ATP-dependent RNA helicase DHX30	DHX30	134 kDa				0	17	24		6270098	1.48592e+07
208	P49750	YLP motif-containing protein 1	YLPM1	242 kDa				0	17	24		1.09308e+07	23352370
209	Q8IUD2	ELKS/Rab6-interacting/CAST family member 1	ERC1	128 kDa				0	20	24		1.08156e+06	1.31533e+07
210	Q07866	Kinesin light chain 1	KLC1	65 kDa				0	23	24		894159	1.55975e+06
211	P35580	Myosin-10	MYH10	229 kDa			✓	0	0	24			6031189
212	O00391	Sulfhydryl oxidase 1	QSOX1	83 kDa		✓	✓	22	23	23	111679900	250835500	2.36201e+08
213	P11021	Endoplasmic reticulum chaperone BiP	HSPA5	72 kDa		✓	✓	21	25	23	2.39484e+07	5.18181e+07	7.85319e+07
214	O00571	ATP-dependent RNA helicase DDX3X	DDX3X	73 kDa			✓	20	20	23	38063310	1.2459e+06	1720076
215	P35241	Radixin	RDX	69 kDa			✓	19	24	23	4.94959e+06	2.95155e+07	4.44095e+07
216	P14618	Pyruvate kinase PKM	PKM	58 kDa			✓	19	23	23	2.67339e+07	1.66273e+08	232019700
217	P49368	T-complex protein 1 subunit gamma	CCT3	61 kDa			✓	19	22	23	7.20274e+06	8.66619e+07	1.79495e+08
218	P15311	Ezrin	EZR	69 kDa			✓	19	22	23	28017690	1.07582e+08	1.72562e+08
219	Q14697	Neutral alpha-glucosidase AB	GANAB	107 kDa		✓	✓	18	22	23	4.48987e+06	62608720	1.24475e+08
220	P78371	T-complex protein 1 subunit beta	CCT2	57 kDa			✓	18	22	23	1.45301e+07	133263100	2.62297e+08
221	Q9Y4L1	Hypoxia up-regulated protein 1	HYOU1	111 kDa		✓	✓	18	22	23	6494888	2.44009e+07	3.80797e+07
222	Q96AC1	Fermitin family homolog 2	FERMT2	78 kDa	✓			17	22	23	1.08733e+07	2.30537e+08	252891300
223	P45974	Ubiquitin carboxyl-terminal hydrolase 5	USP5	96 kDa				17	22	23	1977398	12563970	1.73022e+07
224	Q8WUM4	Programmed cell death 6-interacting protein	PDCD6IP	96 kDa			✓	17	22	23	7.4701e+06	2.7437e+07	19938730
225	P42285	Exosome RNA helicase MTR4	MTREX	118 kDa	✓			16	21	23	1.36325e+06	19272910	44832840
226	P11216	Glycogen phosphorylase, brain form	PYGB	97 kDa			✓	14	21	23	1.83203e+07	9.65967e+07	1.21916e+08
227	Q13616	Cullin-1	CUL1	90 kDa				13	22	23	822259	1.15888e+07	22370530
228	Q9NR30	Nucleolar RNA helicase 2	DDX21	87 kDa				13	23	23	339136	5.29567e+06	1.19416e+07
229	P31939	Bifunctional purine biosynthesis protein PURH	ATIC	65 kDa			✓	13	21	23	117729	6.63957e+06	8.20677e+06
230	Q9Y4E8	Ubiquitin carboxyl-terminal hydrolase 15	USP15	112 kDa				13	23	23	264882	2831226	5.89477e+06
231	O14776	Transcription elongation regulator 1	TCERG1	124 kDa				10	17	23	1.26301e+06	5866107	15958900
232	O15031	Plexin-B2	PLXNB2	205 kDa		✓	✓	9	20	23		3.95919e+07	7.12302e+07
233	P22102	Trifunctional purine biosynthetic protein adenosine-3	GART	108 kDa			✓	8	18	23		36489980	55587170
234	Q9C0C9	(E3-independent) E2 ubiquitin-conjugating enzyme	UBE2O	141 kDa				6	18	23		11245140	1.61912e+07
235	Q15042	Rab3 GTPase-activating protein catalytic subunit	RAB3GAP1	111 kDa	✓		✓	5	19	23		9.37123e+06	1.34171e+07
236	O15027	Protein transport protein Sec16A	SEC16A	252 kDa				4	15	23		1.05686e+07	1.8861e+07
237	Q9Y3P9	Rab GTPase-activating protein 1	RABGAP1	122 kDa				0	20	23		1770863	19187200
238	Q9H3U1	Protein unc-45 homolog A	UNC45A	103 kDa				0	21	23		1.2288e+07	2.1854e+07
239	Q9H4M9	EH domain-containing protein 1	EHD1	61 kDa			✓	0	24	23		3.93491e+07	6.34287e+07
240	Q5JSH3	WD repeat-containing protein 44	WDR44	101 kDa				0	23	23		40022860	5.33451e+07
241	Q9UIA9	Exportin-7	XPO7	124 kDa				0	20	23		2911869	6.13169e+06
242	Q9C0D5	Protein TANC1	TANC1	202 kDa				0	14	23		4.29066e+06	6360679
243	Q9H583	HEAT repeat-containing protein 1	HEATR1	242 kDa				0	20	23		1.4132e+07	7.00844e+06
244	Q9HC35	Echinoderm microtubule-associated protein-like 4	EML4	109 kDa				0	16	23		22070040	38508930
245	Q7Z460	CLIP-associating protein 1	CLASP1	169 kDa				0	23	23		590214	1192517
246	P24928	DNA-directed RNA polymerase II subunit RPB1	POLR2A	217 kDa				0	36	23			1.70484e+07
247	O00507	Probable ubiquitin carboxyl-terminal hydrolase FAF-Y	USP9Y	291 kDa				0	0	23			1.66551e+06
248	P19021	Peptidyl-glycine alpha-amidating monooxygenase	PAM	108 kDa		✓	✓	21	22	22	19083260	4.27142e+07	3.13056e+07
249	Q99985	Semaphorin-3C	SEMA3C	85 kDa		✓	✓	21	22	22	29886080	8.38464e+07	8.85054e+07
250	Q02790	Peptidyl-prolyl cis-trans isomerase FKBP4	FKBP4	52 kDa	✓		✓	21	22	22	1.2546e+07	2.59566e+07	3.15885e+07
251	Q02818	Nucleobindin-1	NUCB1	54 kDa	✓	✓	✓	20	21	22	4.73259e+07	1.6167e+08	1.89411e+08
252	P07437	Tubulin beta chain	TUBB	50 kDa	✓		✓	19	21	22	7.11578e+06	13797610	1.92317e+07
253	P14625	Endoplasmin	HSP90B1	92 kDa	✓	✓	✓	19	20	22	1.06234e+06	2706826	3.4722e+06
254	Q10567	AP-1 complex subunit beta-1	AP1B1	105 kDa				19	23	22	1.7181e+07	2.45001e+08	3.62996e+08
255	Q06124	Tyrosine-protein phosphatase non-receptor type 11	PTPN11	68 kDa				17	19	22	11849340	42293430	5.88137e+07
256	P13667	Protein disulfide-isomerase A4	PDIA4	73 kDa	✓	✓		17	22	22	2084044	3.79782e+07	75992170
257	P14868	Aspartate--tRNA ligase, cytoplasmic	DARS1	57 kDa			✓	16	21	22	1554654	44048360	6.83764e+07
258	P33993	DNA replication licensing factor MCM7	MCM7	81 kDa				14	21	22	2.23517e+06	40364770	7.06704e+07
259	P35606	Coatomer subunit beta'	COPB2	102 kDa				14	22	22	1.12483e+06	22557550	3.2493e+07
260	P23921	Ribonucleoside-diphosphate reductase large subunit	RRM1	90 kDa	✓			13	20	22	20013.3	4.25748e+06	9.21261e+06
261	P61011	Signal recognition particle 54 kDa protein	SRP54	56 kDa				12	12	22	4.47028e+06	54604520	1.34452e+08
262	P43243	Matrin-3	MATR3	95 kDa				6	21	22	1.2555e+06	2.7277e+07	4.57511e+07
263	P49589	Cysteine--tRNA ligase, cytoplasmic	CARS1	85 kDa				6	18	22	600265	6.41731e+06	4.60569e+06
264	O95218	Zinc finger Ran-binding domain-containing protein 2	ZRANB2	37 kDa				6	10	22	83688.7	17550660	2.60747e+07
265	Q8WX93	Palladin	PALLD	151 kDa				5	22	22		118819000	1.82184e+08
266	Q03252	Lamin-B2	LMNB2	70 kDa				4	20	22		40228550
267	P51003	Poly(A) polymerase alpha	PAPOLA	83 kDa				4	20	22		1.47031e+07	2.66238e+07
268	O95163	Elongator complex protein 1	ELP1	150 kDa	✓			2	16	22		9.73343e+06	18570550
269	O43719	HIV Tat-specific factor 1	HTATSF1	86 kDa				2	23	22		2.36799e+07	5.49863e+07
270	O60306	RNA helicase aquarius	AQR	171 kDa				2	17	22		1.455e+07	24780540
271	P21281	V-type proton ATPase subunit B, brain isoform	ATP6V1B2	57 kDa			✓	0	13	22		9.21016e+06	1.85576e+07
272	Q9H2U1	ATP-dependent DNA/RNA helicase DHX36	DHX36	115 kDa			✓	0	18	22		2.71899e+07	5.18537e+07
273	O43290	U4/U6.U5 tri-snRNP-associated protein 1	SART1	90 kDa				0	15	22		6.3599e+06	11725590
274	Q7Z478	ATP-dependent RNA helicase DHX29	DHX29	155 kDa				0	18	22		11828550	2.48651e+07
275	Q14562	ATP-dependent RNA helicase DHX8	DHX8	139 kDa				0	17	22		3.0098e+07
276	Q9C0C2	182 kDa tankyrase-1-binding protein	TNKS1BP1	182 kDa				0	15	22		6614952	17090860
277	Q9NR09	Baculoviral IAP repeat-containing protein 6	BIRC6	530 kDa				0	15	22		5.22809e+06	12693530
278	O95602	DNA-directed RNA polymerase I subunit RPA1	POLR1A	195 kDa				0	13	22		1.25615e+07	30113800
279	Q8IYB7	DIS3-like exonuclease 2	DIS3L2	99 kDa				0	21	22		40833440
280	Q5GLZ8	Probable E3 ubiquitin-protein ligase HERC4	HERC4	119 kDa				0	18	22		2.54547e+06	4034754
281	O75691	Small subunit processome component 20 homolog	UTP20	318 kDa				0	8	22		540476	4.60488e+06
282	P02786	Transferrin receptor protein 1	TFRC	85 kDa			✓	20	21	21	2889950	2.15914e+07	2.78096e+07
283	Q9HCK4	Roundabout homolog 2	ROBO2	151 kDa	✓	✓	✓	20	17	21	5.91299e+07	150224600	126920700
284	O43143	Pre-mRNA-splicing factor ATP-dependent RNA helicase DHX15	DHX15	91 kDa				20	21	21	1.18705e+07	1.49368e+08	204695100
285	P30153	Serine/threonine-protein phosphatase 2A 65 kDa regulatory subunit A alpha isoform	PPP2R1A	65 kDa			✓	19	20	21	35951440	2.79983e+08	6.23286e+08
286	Q9Y6N7	Roundabout homolog 1	ROBO1	181 kDa		✓		19	22	21	1.78505e+07	32594320	29966800
287	P68371	Tubulin beta-4B chain	TUBB4B	50 kDa			✓	19	21	21	33913720	1.24352e+08	2.42505e+08
288	Q13885	Tubulin beta-2A chain	TUBB2A	50 kDa			✓	18	21	21	1.02293e+07	7.98888e+07	1.67424e+08
289	Q9BVA1	Tubulin beta-2B chain	TUBB2B	50 kDa				18	21	21	5374842	101934730	176200100
290	Q9BUQ8	Probable ATP-dependent RNA helicase DDX23	DDX23	96 kDa			✓	18	19	21	14715890	1.88863e+08	214083700
291	Q9Y2A7	Nck-associated protein 1	NCKAP1	129 kDa			✓	18	38	21	2622261	44836340	83506390
292	P08581	Hepatocyte growth factor receptor	MET	156 kDa		✓		17	20	21	211526	2.06971e+07	3.0688e+07
293	P08729	Keratin, type II cytoskeletal 7	KRT7	51 kDa			✓	17	20	21	9.12041e+06	1.31835e+08	225556200
294	Q9NYU2	UDP-glucose:glycoprotein glucosyltransferase 1	UGGT1	177 kDa		✓	✓	17	21	21	7.70258e+06	7.85319e+06	6.45614e+06
295	P48643	T-complex protein 1 subunit epsilon	CCT5	60 kDa			✓	15	21	21	5.13248e+07	158228700	1.11456e+08
296	P55268	Laminin subunit beta-2	LAMB2	196 kDa		✓	✓	15	19	21	1.86015e+06	8.15912e+06	9.00165e+06
297	P41250	Glycine--tRNA ligase	GARS1	83 kDa			✓	14	19	21	3.17176e+06	22851650	4.00398e+07
298	P17844	Probable ATP-dependent RNA helicase DDX5	DDX5	69 kDa	✓		✓	14	18	21	3.85197e+06	3.31097e+06	3.4929e+06
299	O43592	Exportin-T	XPOT	110 kDa				14	22	21	705739	8.68337e+06	1.26498e+07
300	Q01813	ATP-dependent 6-phosphofructokinase, platelet type	PFKP	86 kDa			✓	13	19	21	324626	424243	255343
301	P27816	Microtubule-associated protein 4	MAP4	121 kDa				11	19	21	2482009	6826270	5.91191e+06
302	O15067	Phosphoribosylformylglycinamidine synthase	PFAS	145 kDa			✓	10	21	21	270872	8972045	1.34659e+07
303	O43432	Eukaryotic translation initiation factor 4 gamma 3	EIF4G3	177 kDa				8	13	21	1.53794e+06	4.0867e+07	76564190
304	Q08J23	RNA cytosine C(5)-methyltransferase NSUN2	NSUN2	86 kDa			✓	7	18	21		9.40561e+06	7.06112e+06
305	Q9Y2W1	Thyroid hormone receptor-associated protein 3	THRAP3	109 kDa			✓	6	19	21		3026283	1.60527e+07
306	Q99798	Aconitate hydratase, mitochondrial	ACO2	85 kDa				6	17	21		1.0278e+07	15891490
307	Q9BQ52	Zinc phosphodiesterase ELAC protein 2	ELAC2	92 kDa				4	19	21		1.37544e+06	4.25236e+07
308	Q9UPQ0	LIM and calponin homology domains-containing protein 1	LIMCH1	122 kDa				2	20	21		1.00439e+07	15487060
309	O94979	Protein transport protein Sec31A	SEC31A	133 kDa				0	20	21		8.48209e+06	2.52881e+07
310	Q9P2R3	Rabankyrin-5	ANKFY1	128 kDa			✓	0	16	21		1.7584e+07	38070450
311	Q96T76	MMS19 nucleotide excision repair protein homolog	MMS19	113 kDa				0	18	21		1.17187e+08	1.8803e+08
312	Q10570	Cleavage and polyadenylation specificity factor subunit 1	CPSF1	161 kDa				0	12	21		9.85691e+06	2.09623e+07
313	O43252	Bifunctional 3'-phosphoadenosine 5'-phosphosulfate synthase 1	PAPSS1	71 kDa				0	18	21		1.13771e+07	16369420
314	Q14676	Mediator of DNA damage checkpoint protein 1	MDC1	227 kDa				0	15	21		57921780	1.07001e+08
315	Q96KR1	Zinc finger RNA-binding protein	ZFR	117 kDa				0	16	21		928809	5.11394e+06
316	Q9HCE1	Helicase MOV-10	MOV10	114 kDa				0	16	21		1.00962e+07	34430730
317	Q9Y2K7	Lysine-specific demethylase 2A	KDM2A	133 kDa				0	17	21		5671167	14904380
318	P55196	Afadin	AFDN	207 kDa				0	16	21		18644000	2.6837e+07
319	O94874	E3 UFM1-protein ligase 1	UFL1	90 kDa				0	19	21		1.06048e+06	1.39082e+07
320	Q69YQ0	Cytospin-A	SPECC1L	125 kDa				0	13	21		7.8237e+06	16920210
321	Q5VTR2	E3 ubiquitin-protein ligase BRE1A	RNF20	114 kDa				0	19	21		1.2201e+07	3.33386e+07
322	P78347	General transcription factor II-I	GTF2I	112 kDa				0	14	21		5121314	9.21893e+06
323	O14974	Protein phosphatase 1 regulatory subunit 12A	PPP1R12A	115 kDa				0	18	21		2843573	6.21867e+06
324	O14802	DNA-directed RNA polymerase III subunit RPC1	POLR3A	156 kDa				0	12	21		3.07429e+06	6459441
325	Q13618	Cullin-3	CUL3	89 kDa			✓	0	21	21			2.06161e+07
326	Q12860	Contactin-1	CNTN1	113 kDa		✓	✓	20	20	20	324399200	3.34623e+08	4.03468e+08
327	Q10471	Polypeptide N-acetylgalactosaminyltransferase 2	GALNT2	65 kDa				18	20	20	32542300	210123900	527398000
328	P07384	Calpain-1 catalytic subunit	CAPN1	82 kDa			✓	17	19	20	7.16565e+06	16638570	29997980
329	P31948	Stress-induced-phosphoprotein 1	STIP1	63 kDa				16	19	20	4457066	1.75143e+07	23859800
330	P12956	X-ray repair cross-complementing protein 6	XRCC6	70 kDa				15	17	20	3.37225e+06	18700670	28103730
331	Q16706	Alpha-mannosidase 2	MAN2A1	131 kDa			✓	14	19	20	1.73924e+07	1.54517e+08	3.93141e+08
332	O43390	Heterogeneous nuclear ribonucleoprotein R	HNRNPR	71 kDa				13	19	20	21283290	2.11135e+08	454693100
333	P17812	CTP synthase 1	CTPS1	67 kDa				13	18	20	5.09929e+06	1.57826e+07	11341880
334	P10809	60 kDa heat shock protein, mitochondrial	HSPD1	61 kDa			✓	12	16	20	1.05433e+07	123875700	301574500
335	P08237	ATP-dependent 6-phosphofructokinase, muscle type	PFKM	85 kDa				12	19	20	1.28855e+07	117791100	2.16524e+08
336	Q6P3W7	SCY1-like protein 2	SCYL2	104 kDa				12	12	20	2.16067e+06	4.0096e+07	8.61705e+07
337	P49321	Nuclear autoantigenic sperm protein	NASP	85 kDa				11	18	20	1.42617e+07	4.20961e+07	30833800
338	Q6YHK3	CD109 antigen	CD109	162 kDa		✓		11	19	20	6.84827e+06	104304100	218698000
339	Q9Y230	RuvB-like 2	RUVBL2	51 kDa			✓	10	17	20	747350	13879870	2.07201e+07
340	O75165	DnaJ homolog subfamily C member 13	DNAJC13	254 kDa			✓	10	14	20	165954	2.67103e+07	61658600
341	Q9Y5L0	Transportin-3	TNPO3	104 kDa	✓			9	15	20	5.31529e+06	1.56202e+07	34676450
342	P13010	X-ray repair cross-complementing protein 5	XRCC5	83 kDa				9	15	20	1299301	8.37141e+06	4.58903e+07
343	P11387	DNA topoisomerase 1	TOP1	91 kDa				7	17	20	1.19305e+06	4.76871e+07	8.49316e+07
344	Q14139	Ubiquitin conjugation factor E4 A	UBE4A	123 kDa				6	15	20	1.19264e+06	3.92002e+07	6.07169e+07
345	Q12965	Unconventional myosin-Ie	MYO1E	127 kDa			✓	6	19	20	1.52371e+06	57686420	1.31581e+08
346	Q9C0E2	Exportin-4	XPO4	130 kDa				6	12	20		7868971
347	O60231	Pre-mRNA-splicing factor ATP-dependent RNA helicase DHX16	DHX16	119 kDa				6	16	20		8.90287e+06	21120340
348	P00533	Epidermal growth factor receptor	EGFR	134 kDa		✓		6	14	20		8.39657e+06	9.71051e+06
349	Q8N3U4	Cohesin subunit SA-2	STAG2	141 kDa				6	36	20		1.19808e+07	1.90704e+07
350	Q86XP3	ATP-dependent RNA helicase DDX42	DDX42	103 kDa				4	19	20		14127080	1.74664e+07
351	Q9NVP1	ATP-dependent RNA helicase DDX18	DDX18	75 kDa				3	16	20		11830550	2.382e+07
352	Q9Y5K6	CD2-associated protein	CD2AP	71 kDa			✓	3	16	20		9.51707e+06	1.73563e+07
353	Q13435	Splicing factor 3B subunit 2	SF3B2	100 kDa				3	19	20		6.6144e+06	1.57439e+07
354	Q5JRX3	Presequence protease, mitochondrial	PITRM1	117 kDa				0	15	20		1268923	1.17668e+06
355	O14497	AT-rich interactive domain-containing protein 1A	ARID1A	242 kDa				0	10	20		6.83117e+06	1.68128e+07
356	Q9NZB2	Constitutive coactivator of PPAR-gamma-like protein 1	FAM120A	122 kDa				0	18	20		5.34497e+06	4.59855e+06
357	P48634	Protein PRRC2A	PRRC2A	229 kDa			✓	0	17	20		5.17351e+06	1.58359e+07
358	Q69YN4	Protein virilizer homolog	VIRMA	202 kDa				0	13	20		1.72908e+07	3.25463e+07
359	P50570	Dynamin-2	DNM2	98 kDa			✓	0	19	20		13401710	22779580
360	O75179	Ankyrin repeat domain-containing protein 17	ANKRD17	274 kDa				0	20	20		1.92887e+06	7.97712e+06
361	Q68CQ4	Digestive organ expansion factor homolog	DIEXF	87 kDa				0	13	20		8.65736e+06	2.17221e+07
362	P09884	DNA polymerase alpha catalytic subunit	POLA1	166 kDa				0	15	20		4.63134e+06	1.36263e+07
363	Q9UHD8	Septin-9	SEPTIN9	65 kDa				0	17	20		4.17388e+06	6.53601e+06
364	Q86V48	Leucine zipper protein 1	LUZP1	120 kDa			✓	0	14	20		852509	2.92279e+06
365	Q8NFC6	Biorientation of chromosomes in cell division protein 1-like 1	BOD1L1	330 kDa				0	15	20		1.04501e+06	3495303
366	Q96RL7	Vacuolar protein sorting-associated protein 13A	VPS13A	360 kDa				0	8	20		419760	402840
367	Q9P273	Teneurin-3	TENM3	301 kDa				0	18	20			2.74832e+07
368	O95373	Importin-7	IPO7	120 kDa				28	18	19	4068673	6.27877e+07	147930200
369	P52272	Heterogeneous nuclear ribonucleoprotein M	HNRNPM	78 kDa			✓	26	19	19	178158	5.87473e+06	2.58777e+06
370	P13796	Plastin-2	LCP1	70 kDa			✓	19	19	19	9.25075e+06	130065700	2.60084e+08
371	P07237	Protein disulfide-isomerase	P4HB	57 kDa		✓	✓	15	18	19	3.20478e+06	6.42873e+07	9.54947e+07
372	P11413	Glucose-6-phosphate 1-dehydrogenase	G6PD	59 kDa			✓	15	18	19	1.48273e+07	10723367	1.78653e+07
373	Q9UHI8	A disintegrin and metalloproteinase with thrombospondin motifs 1	ADAMTS1	105 kDa		✓		14	19	19	5.76065e+06	7.3639e+06	1894788
374	P16885	1-phosphatidylinositol 4,5-bisphosphate phosphodiesterase gamma-2	PLCG2	148 kDa			✓	14	17	19	1.88228e+07	1.03156e+08	173472000
375	P05455	Lupus La protein	SSB	47 kDa				13	18	19	7050136	20617800	2.23849e+07
376	Q92859	Neogenin	NEO1	160 kDa	✓	✓		13	17	19	520898	45646590	9.39062e+07
377	P14923	Junction plakoglobin	JUP	82 kDa			✓	13	20	19	2.78603e+06	6.51076e+07	7.21155e+07
378	P54577	Tyrosine--tRNA ligase, cytoplasmic	YARS1	59 kDa				13	19	19	3381790	1.70995e+07	17203780
379	P05023	Sodium/potassium-transporting ATPase subunit alpha-1	ATP1A1	113 kDa	✓		✓	12	17	19	6.01748e+06	1.91611e+07	24041820
380	P46060	Ran GTPase-activating protein 1	RANGAP1	64 kDa				11	16	19	3.17642e+06	50405990	70482360
381	P27708	CAD protein	CAD	243 kDa			✓	10	14	19	5.60154e+06	2.49672e+07	31762700
382	P12268	Inosine-5'-monophosphate dehydrogenase 2	IMPDH2	56 kDa			✓	10	13	19	2534558	37717190	3.93114e+07
383	Q9H2M9	Rab3 GTPase-activating protein non-catalytic subunit	RAB3GAP2	156 kDa				10	16	19	3.32528e+06	3.78584e+07	68309140
384	Q15459	Splicing factor 3A subunit 1	SF3A1	89 kDa				9	17	19	173594	333775	878292
385	P52306	Rap1 GTPase-GDP dissociation stimulator 1	RAP1GDS1	66 kDa			✓	9	19	19	892759	11284550	2.15789e+07
386	Q9UH65	Switch-associated protein 70	SWAP70	69 kDa				7	15	19	213565	1.02765e+07	1.38011e+07
387	Q14166	Tubulin--tyrosine ligase-like protein 12	TTLL12	74 kDa				6	18	19	1213928	9.22618e+06	9.9544e+06
388	Q13219	Pappalysin-1	PAPPA	181 kDa		✓		6	19	19	320907	17156620	24380870
389	P49748	Very long-chain specific acyl-CoA dehydrogenase, mitochondrial	ACADVL	70 kDa	✓			5	16	19		67478730	1.24388e+08
390	Q14258	E3 ubiquitin/ISG15 ligase TRIM25	TRIM25	71 kDa				4	17	19		1.03851e+07	14622340
391	Q9BTW9	Tubulin-specific chaperone D	TBCD	133 kDa				3	15	19		2.67495e+06	10219828
392	Q9NQW6	Anillin	ANLN	124 kDa				2	14	19		24155510	1.77405e+07
393	Q92922	SWI/SNF complex subunit SMARCC1	SMARCC1	123 kDa				1	15	19		2.03419e+07	3.14264e+07
394	Q8TEX9	Importin-4	IPO4	119 kDa				0	18	19		6.75492e+06	7364876
395	Q13451	Peptidyl-prolyl cis-trans isomerase FKBP5	FKBP5	51 kDa			✓	0	16	19		4.92316e+06	1.10859e+07
396	Q9UIG0	Tyrosine-protein kinase BAZ1B	BAZ1B	171 kDa				0	18	19		16216460	2.72707e+07
397	Q5T200	Zinc finger CCCH domain-containing protein 13	ZC3H13	197 kDa				0	11	19		11873760	2.36073e+07
398	Q6IN85	Serine/threonine-protein phosphatase 4 regulatory subunit 3A	PPP4R3A	95 kDa				0	16	19		7.26531e+06	5819826
399	Q8N1F7	Nuclear pore complex protein Nup93	NUP93	93 kDa				0	16	19		8.9002e+06	13014480
400	P52732	Kinesin-like protein KIF11	KIF11	119 kDa				0	13	19		6.04592e+06	8.42179e+06
401	P21399	Cytoplasmic aconitate hydratase	ACO1	98 kDa			✓	0	18	19		4.41662e+06	4586161
402	Q6KC79	Nipped-B-like protein	NIPBL	316 kDa			✓	0	6	19		1.81595e+06	3292168
403	Q8N1G2	Cap-specific mRNA (nucleoside-2'-O-)-methyltransferase 1	CMTR1	95 kDa				0	15	19		10197740	1.98889e+07
404	Q9BSJ2	Gamma-tubulin complex component 2	TUBGCP2	103 kDa				0	16	19		4.17607e+06	4.96001e+06
405	Q9H3S7	Tyrosine-protein phosphatase non-receptor type 23	PTPN23	179 kDa			✓	0	13	19		2.46833e+06	5.71995e+06
406	Q9UI26	Importin-11	IPO11	113 kDa				0	16	19		1871477	6276950
407	Q9HAU5	Regulator of nonsense transcripts 2	UPF2	148 kDa				0	16	19		6675140	1.31177e+07
408	Q15833	Syntaxin-binding protein 2	STXBP2	66 kDa			✓	0	14	19		3388582	5.02144e+06
409	O15020	Spectrin beta chain, non-erythrocytic 2	SPTBN2	271 kDa				0	12	19		614330	3.82871e+06
410	Q96K76	Ubiquitin carboxyl-terminal hydrolase 47	USP47	157 kDa				0	19	19		391504	2.0005e+06
411	O95155	Ubiquitin conjugation factor E4 B	UBE4B	146 kDa				0	0	19			1.94238e+07
412	P04264	Keratin, type II cytoskeletal 1	KRT1	66 kDa			✓	19	18	18	7.50539e+07	5.48314e+08	811197600
413	P35908	Keratin, type II cytoskeletal 2 epidermal	KRT2	65 kDa			✓	19	19	18	7.36846e+07	2.59336e+08	1.53341e+08
414	O60763	General vesicular transport factor p115	USO1	108 kDa				17	20	18	1.58834e+09	2771630000	3.06008e+09
415	P04350	Tubulin beta-4A chain	TUBB4A	50 kDa	✓		✓	17	18	18	2.15366e+08	2.53315e+08	199831000
416	Q9Y4K0	Lysyl oxidase homolog 2	LOXL2	87 kDa		✓		16	17	18	4.03113e+07	1.70097e+08	3.06221e+08
417	Q08380	Galectin-3-binding protein	LGALS3BP	65 kDa		✓	✓	16	18	18	4711748	24719690	38732630
418	Q13275	Semaphorin-3F	SEMA3F	88 kDa	✓	✓		16	17	18	495886	7.25343e+06	9488256
419	P13647	Keratin, type II cytoskeletal 5	KRT5	62 kDa			✓	16	20	18	5.60004e+06	6.96977e+07	1.40405e+07
420	P07355	Annexin A2	ANXA2	39 kDa	✓		✓	15	16	18	27058368	3.59662e+07	4.53042e+07
421	Q16555	Dihydropyrimidinase-related protein 2	DPYSL2	62 kDa			✓	15	19	18	1.95876e+06	1.45353e+07	12056740
422	P48444	Coatomer subunit delta	ARCN1	57 kDa				15	18	18	1.53657e+06	2.68356e+07	75912270
423	Q13509	Tubulin beta-3 chain	TUBB3	50 kDa			✓	15	18	18	130181	1.17065e+07	2.14435e+07
424	O43776	Asparagine--tRNA ligase, cytoplasmic	NARS1	63 kDa			✓	14	17	18	35816040	3.02216e+07	2.82526e+07
425	Q14651	Plastin-1	PLS1	70 kDa			✓	14	16	18	2186624	2.07261e+07	43003330
426	Q01433	AMP deaminase 2	AMPD2	101 kDa				14	18	18	3.74366e+06	5054961	3235319
427	P61978	Heterogeneous nuclear ribonucleoprotein K	HNRNPK	51 kDa			✓	13	18	18	6.25489e+06	5.25088e+07	1.06124e+08
428	Q16851	UTP--glucose-1-phosphate uridylyltransferase	UGP2	57 kDa			✓	13	18	18	1.10126e+06	1.48174e+07	3.43159e+07
429	Q99832	T-complex protein 1 subunit eta	CCT7	59 kDa			✓	13	15	18	5.85543e+06	3.66298e+07	1.05412e+08
430	O00469	Procollagen-lysine,2-oxoglutarate 5-dioxygenase 2	PLOD2	85 kDa		✓	✓	12	18	18	1316779	2.13165e+07	3.08041e+07
431	P51610	Host cell factor 1	HCFC1	209 kDa				12	17	18	1.03923e+06	14543530	2.24115e+07
432	Q5JPE7	Nodal modulator 2	NOMO2	139 kDa		✓		12	17	18	87529.9	203514	505340
433	P28838	Cytosol aminopeptidase	LAP3	56 kDa			✓	11	18	18	6.9503e+06	6.57712e+07	145886400
434	O43242	26S proteasome non-ATPase regulatory subunit 3	PSMD3	61 kDa			✓	10	15	18	6.73535e+06	4.07672e+07	55300900
435	Q96TA1	Protein Niban 2	NIBAN2	84 kDa			✓	10	18	18	3.30507e+06	5.44794e+07	8.63397e+07
436	Q8NE71	ATP-binding cassette sub-family F member 1	ABCF1	96 kDa	✓			10	17	18	4.63751e+06	9.02842e+06	6482239
437	Q96KP4	Cytosolic non-specific dipeptidase	CNDP2	53 kDa			✓	10	18	18	403541	8664195	2.72154e+07
438	Q96P70	Importin-9	IPO9	116 kDa				10	13	18	3.5764e+06	4.81874e+07	1.138e+08
439	P20042	Eukaryotic translation initiation factor 2 subunit 2	EIF2S2	38 kDa				10	18	18	3.10352e+06	3.97314e+07	7.24574e+07
440	P04040	Catalase	CAT	60 kDa			✓	10	18	18	416500	28792280	60626850
441	Q6PKG0	La-related protein 1	LARP1	124 kDa	✓			10	15	18	1.41672e+06	1784134	6.27287e+06
442	Q05682	Caldesmon	CALD1	93 kDa				9	16	18	571647	9.79273e+06	18142870
443	P43490	Nicotinamide phosphoribosyltransferase	NAMPT	56 kDa			✓	8	16	18	71066	939081	1.16468e+06
444	O95340	Bifunctional 3'-phosphoadenosine 5'-phosphosulfate synthase 2	PAPSS2	70 kDa				8	19	18	1758850	1.26584e+07	2.51494e+07
445	Q9H2K8	Serine/threonine-protein kinase TAO3	TAOK3	105 kDa				8	13	18	1.1337e+06	12918519	1.81635e+07
446	Q86TU7	Actin-histidine N-methyltransferase	SETD3	67 kDa				7	18	18	593902	25598010	3.87287e+07
447	P27694	Replication protein A 70 kDa DNA-binding subunit	RPA1	68 kDa				5	17	18	782876	13614850	2.97527e+07
448	O60333	Kinesin-like protein KIF1B	KIF1B	204 kDa				5	9	18		2941045	5083113
449	Q8WWM7	Ataxin-2-like protein	ATXN2L	113 kDa				5	15	18		5.68578e+07	119735500
450	Q9NXH9	tRNA (guanine(26)-N(2))-dimethyltransferase	TRMT1	72 kDa				4	16	18		4.34771e+07	7.69365e+07
451	Q96ST2	Protein IWS1 homolog	IWS1	92 kDa				4	13	18		1.25234e+07	2.71755e+07
452	Q96SI9	Spermatid perinuclear RNA-binding protein	STRBP	74 kDa				4	14	18		20691410	29715290
453	Q96GQ7	Probable ATP-dependent RNA helicase DDX27	DDX27	90 kDa	✓			2	16	18		10637719	2.18432e+07
454	Q9UKN8	General transcription factor 3C polypeptide 4	GTF3C4	92 kDa				2	13	18		8.81271e+07	1.24935e+08
455	Q9NWH9	SAFB-like transcription modulator	SLTM	117 kDa				2	12	18		4420480	5895078
456	Q15436	Protein transport protein Sec23A	SEC23A	86 kDa				0	18	18		22213820	4.10859e+07
457	P35658	Nuclear pore complex protein Nup214	NUP214	214 kDa				0	18	18		8210144	13960060
458	P26196	Probable ATP-dependent RNA helicase DDX6	DDX6	54 kDa				0	17	18		1.08128e+07	1.65214e+07
459	Q5VZK9	F-actin-uncapping protein LRRC16A	CARMIL1	152 kDa			✓	0	17	18		3.20811e+06	6.90804e+06
460	O75534	Cold shock domain-containing protein E1	CSDE1	89 kDa				0	16	18		1.37122e+07	2.26191e+07
461	O75150	E3 ubiquitin-protein ligase BRE1B	RNF40	114 kDa				0	14	18		5.65866e+06	8863437
462	Q9UNX4	WD repeat-containing protein 3	WDR3	106 kDa				0	16	18		3967317	7.58499e+06
463	P42345	Serine/threonine-protein kinase mTOR	MTOR	289 kDa				0	10	18		3.57223e+06	4493791
464	Q92620	Pre-mRNA-splicing factor ATP-dependent RNA helicase PRP16	DHX38	141 kDa				0	16	18		1.90695e+07	21620980
465	P08069	Insulin-like growth factor 1 receptor	IGF1R	155 kDa		✓		0	13	18		6.91082e+06	1.27829e+07
466	O75146	Huntingtin-interacting protein 1-related protein	HIP1R	119 kDa				0	13	18		12275560	4695731
467	Q9NQW7	Xaa-Pro aminopeptidase 1	XPNPEP1	70 kDa			✓	0	18	18		9421466	18691130
468	Q9UBC2	Epidermal growth factor receptor substrate 15-like 1	EPS15L1	94 kDa				0	15	18		41034660	37500870
469	Q9UNM6	26S proteasome non-ATPase regulatory subunit 13	PSMD13	43 kDa				0	17	18		3.49701e+06	8.58374e+06
470	Q8TCS8	Polyribonucleotide nucleotidyltransferase 1, mitochondrial	PNPT1	86 kDa				0	16	18		1.71309e+07	3.56937e+07
471	P48681	Nestin	NES	177 kDa				0	8	18		2.88682e+07	7.27756e+07
472	Q14764	Major vault protein	MVP	99 kDa			✓	0	16	18		7.7869e+06	367615
473	P42224	Signal transducer and activator of transcription 1-alpha/beta	STAT1	87 kDa				0	16	18		3.09274e+06	6.46541e+06
474	Q14997	Proteasome activator complex subunit 4	PSME4	211 kDa				0	16	18		7703196	1.07777e+07
475	A6NHR9	Structural maintenance of chromosomes flexible hinge domain-containing protein 1	SMCHD1	226 kDa				0	15	18		3516513	9496781
476	O60701	UDP-glucose 6-dehydrogenase	UGDH	55 kDa			✓	0	18	18		8347867	9440402
477	Q13535	Serine/threonine-protein kinase ATR	ATR	301 kDa				0	8	18		752772	3654045
478	Q96ST3	Paired amphipathic helix protein Sin3a	SIN3A	145 kDa				0	24	18			1.21156e+07
479	Q7Z3U7	Protein MON2 homolog	MON2	190 kDa			✓	0	0	18			Missing Value
480	Q06481	Amyloid-like protein 2	APLP2	87 kDa	✓	✓	✓	17	17	17	141236600	304825600	275711600
481	P51812	Ribosomal protein S6 kinase alpha-3	RPS6KA3	84 kDa				17	19	17	38468420	40332390	9.56114e+07
482	Q13214	Semaphorin-3B	SEMA3B	83 kDa		✓		16	18	17	2.68018e+07	3.05144e+07	25700350
483	P22105	Tenascin-X	TNXB	458 kDa		✓	✓	16	17	17	2.21962e+06	25940890	4.41273e+07
484	Q05086	Ubiquitin-protein ligase E3A	UBE3A	101 kDa				16	16	17	8143075	119897400	65692360
485	P49756	RNA-binding protein 25	RBM25	100 kDa				16	32	17	7.44969e+07	1.25845e+08	1.60751e+08
486	O94985	Calsyntenin-1	CLSTN1	110 kDa	✓	✓		15	18	17	1541775	44090290	72635440
487	P23526	Adenosylhomocysteinase	AHCY	48 kDa			✓	15	17	17	6.81243e+06	8.50387e+07	175652400
488	P30101	Protein disulfide-isomerase A3	PDIA3	57 kDa	✓	✓	✓	15	16	17	1.24915e+06	1.78944e+07	7.23299e+07
489	P31150	Rab GDP dissociation inhibitor alpha	GDI1	51 kDa				15	15	17	17634310	16539500	14602450
490	P05556	Integrin beta-1	ITGB1	88 kDa		✓	✓	15	16	17	1.20744e+06	30371880	4.02586e+07
491	Q9NTK5	Obg-like ATPase 1	OLA1	45 kDa	✓		✓	14	17	17	1.42626e+08	2.05495e+08	2.31139e+08
492	Q04695	Keratin, type I cytoskeletal 17	KRT17	48 kDa				14	17	17	8043197	3.05556e+07	3.72951e+07
493	P50991	T-complex protein 1 subunit delta	CCT4	58 kDa			✓	12	17	17	2578117	2.94139e+07	42856090
494	Q9Y2X3	Nucleolar protein 58	NOP58	60 kDa				12	14	17	2.24566e+06	8617116	7384843
495	Q16222	UDP-N-acetylhexosamine pyrophosphorylase	UAP1	59 kDa				11	15	17	2512195	10008579	1.81593e+07
496	Q04721	Neurogenic locus notch homolog protein 2	NOTCH2	265 kDa		✓		10	14	17	2.22507e+06	532061	6.50347e+07
497	Q09161	Nuclear cap-binding protein subunit 1	NCBP1	92 kDa				9	15	17	1.98896e+06	2.98393e+07	5.98704e+07
498	Q9H4A3	Serine/threonine-protein kinase WNK1	WNK1	251 kDa				8	9	17	441005	11832260	19854560
499	Q12931	Heat shock protein 75 kDa, mitochondrial	TRAP1	80 kDa				7	15	17	29880.7	4737044	1.38817e+07
500	P98088	Mucin-5AC	MUC5AC	586 kDa		✓	✓	7	16	17	667842	1.67581e+07	3.92194e+07
501	P20810	Calpastatin	CAST	77 kDa				6	14	17	2.29959e+07	29503890	2.85484e+07
502	Q8TD16	Protein bicaudal D homolog 2	BICD2	94 kDa				6	13	17	142796	9933183	13078500
503	Q14694	Ubiquitin carboxyl-terminal hydrolase 10	USP10	87 kDa				5	13	17	264090	7.20131e+06	5.80728e+06
504	Q5H9R7	Serine/threonine-protein phosphatase 6 regulatory subunit 3	PPP6R3	98 kDa				5	16	17	657257	2.02313e+07	3.48704e+07
505	Q32MZ4	Leucine-rich repeat flightless-interacting protein 1	LRRFIP1	89 kDa				5	15	17		4345300	8625085
506	P36776	Lon protease homolog, mitochondrial	LONP1	106 kDa				5	14	17		7.68764e+06	2.0961e+07
507	P53992	Protein transport protein Sec24C	SEC24C	118 kDa				4	14	17		5054606	1.13867e+07
508	Q4J6C6	Prolyl endopeptidase-like	PREPL	84 kDa				4	10	17		7.95642e+06	14290030
509	Q9H0D6	5'-3' exoribonuclease 2	XRN2	109 kDa				3	17	17		1.41235e+07	2.24987e+07
510	Q9BZH6	WD repeat-containing protein 11	WDR11	137 kDa				2	11	17		7.49469e+06	1.91736e+07
511	Q9H8H0	Nucleolar protein 11	NOL11	81 kDa				2	14	17		11727320	1.45018e+07
512	P43246	DNA mismatch repair protein Msh2	MSH2	105 kDa				2	12	17		1.13706e+06	33362500
513	O14617	AP-3 complex subunit delta-1	AP3D1	130 kDa				0	18	17		27403320	3.58625e+07
514	Q01780	Exosome component 10	EXOSC10	101 kDa				0	14	17		5.93047e+06	12893390
515	P18858	DNA ligase 1	LIG1	102 kDa				0	13	17		4.55988e+06	7.83425e+06
516	P35221	Catenin alpha-1	CTNNA1	100 kDa				0	19	17		9.5084e+06	26989140
517	P46379	Large proline-rich protein BAG6	BAG6	119 kDa			✓	0	14	17		1.38224e+06	4.21404e+06
518	Q9H9Y6	DNA-directed RNA polymerase I subunit RPA2	POLR1B	128 kDa				0	13	17		3081805	9.52675e+06
519	O75694	Nuclear pore complex protein Nup155	NUP155	155 kDa				0	14	17		9.55626e+06	4.8604e+07
520	Q96BP3	Peptidylprolyl isomerase domain and WD repeat-containing protein 1	PPWD1	74 kDa				0	12	17		4.44497e+07	4.16602e+07
521	Q5VW36	Focadhesin	FOCAD	200 kDa				0	10	17		5936485	11555180
522	Q8NI27	THO complex subunit 2	THOC2	183 kDa				0	11	17		5.93645e+06	9.18961e+06
523	Q14CX7	N-alpha-acetyltransferase 25, NatB auxiliary subunit	NAA25	112 kDa				0	15	17		223634	3597784
524	Q92797	Symplekin	SYMPK	141 kDa				0	14	17		1.06074e+07	1.85477e+07
525	P42566	Epidermal growth factor receptor substrate 15	EPS15	99 kDa				0	17	17		143927	12189480
526	Q5JSZ5	Protein PRRC2B	PRRC2B	243 kDa				0	14	17		4.49696e+06	9652754
527	Q15477	Helicase SKI2W	SKIV2L	138 kDa				0	10	17		7590049	1.30965e+07
528	Q13596	Sorting nexin-1	SNX1	59 kDa				0	16	17		4800736	10459500
529	Q15276	Rab GTPase-binding effector protein 1	RABEP1	99 kDa				0	10	17		2.32962e+06	1.93486e+07
530	Q7Z6B7	SLIT-ROBO Rho GTPase-activating protein 1	SRGAP1	124 kDa				0	12	17		1.33766e+06	4.65451e+06
531	P19367	Hexokinase-1	HK1	102 kDa				0	16	17			4.22079e+07
532	P46459	Vesicle-fusing ATPase	NSF	83 kDa				0	34	17			2.76053e+07
533	Q8NC51	Plasminogen activator inhibitor 1 RNA-binding protein	SERBP1	45 kDa			✓	22	16	16	2.08227e+08	328830100	3.06458e+08
534	O75581	Low-density lipoprotein receptor-related protein 6	LRP6	180 kDa		✓		20	15	16	7.87217e+06	82488800	181340000
535	Q15063	Periostin	POSTN	93 kDa		✓		17	18	16	4.04906e+07	4.63879e+07	59709830
536	Q93063	Exostosin-2	EXT2	82 kDa			✓	17	17	16	7.45579e+07	2.22896e+08	2.55029e+08
537	P23142	Fibulin-1	FBLN1	77 kDa	✓	✓	✓	16	16	16	4.11515e+06	59303460	103836170
538	Q8NBP7	Proprotein convertase subtilisin/kexin type 9	PCSK9	74 kDa		✓		15	15	16	147458300	3.49738e+08	324223300
539	P35052	Glypican-1	GPC1	62 kDa	✓	✓	✓	15	16	16	7.12245e+07	1.38783e+08	7.33198e+08
540	Q9H4F8	SPARC-related modular calcium-binding protein 1	SMOC1	48 kDa		✓		15	15	16	3.85813e+07	7.24977e+07	1.20133e+08
541	P01130	Low-density lipoprotein receptor	LDLR	95 kDa		✓		15	16	16	2.63422e+07	174988700	2.35843e+08
542	P05067	Amyloid-beta precursor protein	APP	87 kDa		✓	✓	15	17	16	6.82451e+06	16289950	2.37638e+07
543	P35443	Thrombospondin-4	THBS4	106 kDa		✓	✓	15	15	16	1.06872e+07	2.30246e+07	25925540
544	P20340	Ras-related protein Rab-6A	RAB6A	24 kDa			✓	14	9	16	6106860	1.5807e+07	1.12376e+07
545	Q15046	Lysine--tRNA ligase	KARS1	68 kDa				13	13	16	5.05041e+06	9.00453e+06	8.23429e+06
546	P00751	Complement factor B	CFB	86 kDa		✓	✓	13	17	16	1199660	9.97373e+06	1.66162e+07
547	P40227	T-complex protein 1 subunit zeta	CCT6A	58 kDa	✓		✓	12	15	16	1.16361e+07	2.64612e+07	4.11799e+07
548	Q9Y3I0	RNA-splicing ligase RtcB homolog	RTCB	55 kDa	✓			12	16	16	1.3535e+06	1.22003e+06	1.03356e+06
549	Q6ZRP7	Sulfhydryl oxidase 2	QSOX2	78 kDa		✓		12	16	16	16707830	128064100	1.91054e+08
550	Q7Z304	MAM domain-containing protein 2	MAMDC2	78 kDa	✓	✓		12	18	16	21038590	182774000	324894500
551	O60506	Heterogeneous nuclear ribonucleoprotein Q	SYNCRIP	70 kDa	✓			12	16	16	1565703	4.99025e+06	1.03227e+07
552	Q93034	Cullin-5	CUL5	91 kDa	✓			12	14	16	9.28026e+06	1.35503e+07	15329010
553	P62136	Serine/threonine-protein phosphatase PP1-alpha catalytic subunit	PPP1CA	38 kDa			✓	12	15	16	6.52306e+06	1.53005e+07	2.33296e+07
554	P62195	26S proteasome regulatory subunit 8	PSMC5	46 kDa			✓	12	14	16	5.45964e+06	1.54666e+07	1.97268e+07
555	O75083	WD repeat-containing protein 1	WDR1	66 kDa	✓		✓	11	15	16	2.83906e+06	1.03353e+07	3.61171e+07
556	Q9UBG0	C-type mannose receptor 2	MRC2	167 kDa		✓		11	14	16	2247937	2.6667e+07	41927590
557	Q9Y265	RuvB-like 1	RUVBL1	50 kDa	✓		✓	11	13	16	906690	2.58482e+07	5609115
558	Q8TAT6	Nuclear protein localization protein 4 homolog	NPLOC4	68 kDa				11	13	16	1.02558e+08	130491000	83829780
559	P43121	Cell surface glycoprotein MUC18	MCAM	72 kDa		✓		10	12	16	1.39986e+06	9.78251e+06	6.84602e+06
560	P05198	Eukaryotic translation initiation factor 2 subunit 1	EIF2S1	36 kDa			✓	10	15	16	1.58818e+06	93717450	145681700
561	Q24JP5	Transmembrane protein 132A	TMEM132A	110 kDa		✓	✓	9	12	16	113354	833005	1.64416e+06
562	O00754	Lysosomal alpha-mannosidase	MAN2B1	114 kDa		✓	✓	9	17	16	1.60521e+06	3.78889e+06	2.62345e+07
563	Q9NSD9	Phenylalanine--tRNA ligase beta subunit	FARSB	66 kDa				9	15	16	445972	5.44997e+06	10394512
564	O60245	Protocadherin-7	PCDH7	116 kDa		✓		8	12	16	191009	139612	213929
565	Q15057	Arf-GAP with coiled-coil, ANK repeat and PH domain-containing protein 2	ACAP2	88 kDa				8	15	16	3921252	1.09376e+07	1.74755e+07
566	P58107	Epiplakin	EPPK1	556 kDa				8	11	16	118228	2.01065e+06	29421730
567	Q9Y6Y8	SEC23-interacting protein	SEC23IP	111 kDa				8	15	16	354397	3.7995e+06	11991240
568	P40222	Alpha-taxilin	TXLNA	62 kDa				8	15	16	66552.9	805048	5245239
569	Q92696	Geranylgeranyl transferase type-2 subunit alpha	RABGGTA	65 kDa				7	16	16	325892	6246265	9.5725e+06
570	O00461	Golgi integral membrane protein 4	GOLIM4	82 kDa				7	13	16		9.07998e+07	1.64919e+08
571	O60343	TBC1 domain family member 4	TBC1D4	147 kDa				7	14	16		9.61989e+06	1.43587e+07
572	Q9NRW7	Vacuolar protein sorting-associated protein 45	VPS45	65 kDa				6	14	16		1.02111e+07	15715630
573	Q9P265	Disco-interacting protein 2 homolog B	DIP2B	171 kDa			✓	6	24	16		2.58099e+06	8.16933e+06
574	P56192	Methionine--tRNA ligase, cytoplasmic	MARS1	101 kDa	✓		✓	5	13	16		2.81902e+07	45699320
575	Q96EK5	KIF-binding protein	KIFBP	72 kDa				5	15	16		5.42051e+07	7.4213e+07
576	P54886	Delta-1-pyrroline-5-carboxylate synthase	ALDH18A1	87 kDa				4	16	16		5.73151e+06	9.89384e+06
577	Q9UHN6	Cell surface hyaluronidase	CEMIP2	154 kDa			✓	3	11	16		13449670	1.56697e+07
578	Q6P2E9	Enhancer of mRNA-decapping protein 4	EDC4	152 kDa				2	12	16		17595040	2.80615e+07
579	Q9UJX4	Anaphase-promoting complex subunit 5	ANAPC5	85 kDa				2	11	16		2.67478e+07	5.14175e+07
580	Q6P1N0	Coiled-coil and C2 domain-containing protein 1A	CC2D1A	104 kDa			✓	2	14	16		5.30882e+06	1.01961e+07
581	Q96JM3	Chromosome alignment-maintaining phosphoprotein 1	CHAMP1	89 kDa				2	11	16		9.51794e+06	1.54874e+07
582	O60678	Protein arginine N-methyltransferase 3	PRMT3	60 kDa				2	10	16		2.26281e+07	3.23059e+07
583	Q99459	Cell division cycle 5-like protein	CDC5L	92 kDa				1	14	16		1.70215e+07	2.79916e+07
584	Q15020	Squamous cell carcinoma antigen recognized by T-cells 3	SART3	110 kDa				0	14	16		3.27959e+06	9.06689e+06
585	Q9UPT8	Zinc finger CCCH domain-containing protein 4	ZC3H4	140 kDa				0	8	16		1.61561e+06	7796225
586	Q9C0B1	Alpha-ketoglutarate-dependent dioxygenase FTO	FTO	58 kDa				0	14	16		1.70554e+07	27097650
587	P22059	Oxysterol-binding protein 1	OSBP	89 kDa				0	15	16		5.71187e+06	1.59547e+07
588	P32754	4-hydroxyphenylpyruvate dioxygenase	HPD	45 kDa			✓	0	14	16		1.3852e+06	4.7937e+06
589	Q68E01	Integrator complex subunit 3	INTS3	118 kDa				0	14	16		4.85745e+06	1.06862e+07
590	Q12788	Transducin beta-like protein 3	TBL3	89 kDa				0	13	16		1.86573e+07	3.15495e+07
591	Q6WCQ1	Myosin phosphatase Rho-interacting protein	MPRIP	117 kDa				0	12	16		3.94225e+07
592	Q96T23	Remodeling and spacing factor 1	RSF1	164 kDa				0	9	16		1.34009e+07	1.59119e+07
593	Q96G46	tRNA-dihydrouridine(47) synthase [NAD(P)(+)]-like	DUS3L	73 kDa				0	14	16		5753127	27633990
594	O95359	Transforming acidic coiled-coil-containing protein 2	TACC2	309 kDa				0	9	16		3.20379e+06	11695560
595	Q5SW79	Centrosomal protein of 170 kDa	CEP170	175 kDa				0	10	16		1497527	2.18294e+07
596	Q4V328	GRIP1-associated protein 1	GRIPAP1	96 kDa				0	14	16		8.04586e+06	1.07079e+07
597	O94776	Metastasis-associated protein MTA2	MTA2	75 kDa				0	14	16		3.56868e+06	9897688
598	Q15437	Protein transport protein Sec23B	SEC23B	86 kDa				0	13	16		2.92414e+06	5.04835e+06
599	Q9Y4B6	DDB1- and CUL4-associated factor 1	DCAF1	169 kDa				0	6	16		8.23871e+06	1.75224e+07
600	Q13310	Polyadenylate-binding protein 4	PABPC4	71 kDa				0	15	16		3.29728e+07	63167460
601	Q6PD62	RNA polymerase-associated protein CTR9 homolog	CTR9	134 kDa				0	10	16		1.5295e+06	6.19024e+06
602	O95425	Supervillin	SVIL	248 kDa				0	9	16		73978.5	1.16124e+07
603	Q7L7X3	Serine/threonine-protein kinase TAO1	TAOK1	116 kDa			✓	0	7	16		1.44019e+07	2.56268e+07
604	Q9H0B6	Kinesin light chain 2	KLC2	69 kDa				0	12	16		647112	596242
605	Q06210	Glutamine--fructose-6-phosphate aminotransferase [isomerizing] 1	GFPT1	79 kDa			✓	0	16	16		756960	1.0487e+06
606	A6NKT7	RanBP2-like and GRIP domain-containing protein 3	RGPD3	197 kDa				0	18	16		742916	3.83244e+06
607	Q9UL18	Protein argonaute-1	AGO1	97 kDa				0	10	16			1.23879e+07
608	Q9NVM9	Integrator complex subunit 13	INTS13	80 kDa				0	16	16			20179800
609	Q13838	Spliceosome RNA helicase DDX39B	DDX39B	49 kDa				22	14	15	2.43217e+07	7.65581e+07	1.2917e+08
610	O60502	Protein O-GlcNAcase	OGA	103 kDa				18	14	15	61402100	8.87118e+07	6.90161e+07
611	Q6UXI9	Nephronectin	NPNT	62 kDa	✓	✓	✓	16	16	15	84635770	251095700	1.86325e+08
612	Q99615	DnaJ homolog subfamily C member 7	DNAJC7	56 kDa			✓	16	15	15	8318041	2.21648e+07	3.82637e+07
613	Q86TH1	ADAMTS-like protein 2	ADAMTSL2	105 kDa		✓		15	17	15	3.35182e+06	8.86042e+06	2.24227e+06
614	Q9BUF5	Tubulin beta-6 chain	TUBB6	50 kDa			✓	15	15	15	1.87771e+07	2.06701e+08	4.47237e+08
615	P28799	Progranulin	GRN	64 kDa		✓	✓	14	15	15	2.11943e+07	311466000	7.37758e+08
616	O14786	Neuropilin-1	NRP1	103 kDa		✓		14	15	15	14485820	42314180	3.14587e+07
617	P49747	Cartilage oligomeric matrix protein	COMP	83 kDa	✓	✓	✓	14	13	15	9.49324e+06	1.39386e+07	1.23285e+07
618	P61221	ATP-binding cassette sub-family E member 1	ABCE1	67 kDa				14	13	15	3.68527e+07	1.69971e+08	3.00673e+08
619	Q8IWV2	Contactin-4	CNTN4	113 kDa		✓		13	15	15	23788150	8.64034e+07	7.04728e+07
620	P40763	Signal transducer and activator of transcription 3	STAT3	88 kDa				13	15	15	3540426	137756100	140253300
621	P30566	Adenylosuccinate lyase	ADSL	55 kDa				13	15	15	1.48661e+07	34727150	6.99772e+07
622	P00338	L-lactate dehydrogenase A chain	LDHA	37 kDa	✓		✓	13	15	15	10831284	94086280	196314600
623	P54652	Heat shock-related 70 kDa protein 2	HSPA2	70 kDa			✓	13	18	15	1.22986e+07	42177070	4.36735e+07
624	P98155	Very low-density lipoprotein receptor	VLDLR	96 kDa		✓		13	16	15	1.13088e+07	1.13257e+07	1.32562e+07
625	P35527	Keratin, type I cytoskeletal 9	KRT9	62 kDa			✓	12	14	15	830061	6308757	1.01259e+07
626	Q09328	Alpha-1,6-mannosylglycoprotein 6-beta-N-acetylglucosaminyltransferase A	MGAT5	85 kDa			✓	12	16	15	2291473	4.27382e+06	2.45277e+06
627	P10253	Lysosomal alpha-glucosidase	GAA	105 kDa		✓	✓	12	15	15	6680943	4.30897e+07	5.36761e+07
628	Q08945	FACT complex subunit SSRP1	SSRP1	81 kDa				12	13	15	6.74265e+06	6.22148e+06	1.39897e+08
629	P62191	26S proteasome regulatory subunit 4	PSMC1	49 kDa				11	14	15	1.18782e+06	6.33569e+06	9020923
630	P61201	COP9 signalosome complex subunit 2	COPS2	52 kDa				11	13	15	1225461	1.10218e+06	1.18154e+06
631	P62140	Serine/threonine-protein phosphatase PP1-beta catalytic subunit	PPP1CB	37 kDa	✓		✓	11	14	15	8645139	2.11079e+07	2.17039e+07
632	O95834	Echinoderm microtubule-associated protein-like 2	EML2	71 kDa				11	15	15	1264542	9088492	1.4831e+07
633	Q01518	Adenylyl cyclase-associated protein 1	CAP1	52 kDa			✓	11	14	15	1.01435e+07	141017400	1.17545e+08
634	P36873	Serine/threonine-protein phosphatase PP1-gamma catalytic subunit	PPP1CC	37 kDa				11	13	15	3.93461e+06	40481960	72693560
635	P43034	Platelet-activating factor acetylhydrolase IB subunit alpha	PAFAH1B1	47 kDa			✓	10	15	15	827347	2.60979e+06	3.78472e+06
636	Q16881	Thioredoxin reductase 1, cytoplasmic	TXNRD1	71 kDa			✓	10	14	15	5.82305e+06	108858800	1.75261e+08
637	P08195	4F2 cell-surface antigen heavy chain	SLC3A2	68 kDa			✓	10	14	15	2237564	5.44146e+07	6.12182e+07
638	P51858	Hepatoma-derived growth factor	HDGF	27 kDa				10	13	15	1957817	3.80222e+07	3.63686e+07
639	P06576	ATP synthase subunit beta, mitochondrial	ATP5F1B	57 kDa			✓	10	15	15	1.19562e+06	2.55502e+07	32791350
640	Q9UKM7	Endoplasmic reticulum mannosyl-oligosaccharide 1,2-alpha-mannosidase	MAN1B1	80 kDa	✓			10	12	15	30870590	3.69819e+08	494940500
641	O14744	Protein arginine N-methyltransferase 5	PRMT5	73 kDa				10	14	15	2.14464e+06	17308950	34501740
642	P29401	Transketolase	TKT	68 kDa			✓	9	15	15	2.57776e+06	22227990	24350010
643	O15371	Eukaryotic translation initiation factor 3 subunit D	EIF3D	64 kDa	✓			9	10	15	2435118	2.92131e+07	4.94657e+07
644	P48506	Glutamate--cysteine ligase catalytic subunit	GCLC	73 kDa	✓			9	14	15	1.47682e+06	4620458	12585220
645	Q16658	Fascin	FSCN1	55 kDa	✓		✓	8	13	15	184793	2.87146e+07	39468800
646	P46087	Probable 28S rRNA (cytosine(4447)-C(5))-methyltransferase	NOP2	89 kDa				8	13	15	588462	1.37419e+07	1.93418e+07
647	Q9NQX3	Gephyrin	GPHN	80 kDa				8	10	15	272004	9072069	1.81813e+07
648	P17655	Calpain-2 catalytic subunit	CAPN2	80 kDa			✓	7	14	15	257004	120378000	217995200
649	P13861	cAMP-dependent protein kinase type II-alpha regulatory subunit	PRKAR2A	46 kDa			✓	7	12	15	962650	2.53585e+07	5.48432e+07
650	Q9BXP5	Serrate RNA effector molecule homolog	SRRT	101 kDa	✓			6	14	15	128556	1.06866e+07	1.83065e+07
651	Q9UHB9	Signal recognition particle subunit SRP68	SRP68	71 kDa				6	16	15	282394	4307474	1.64532e+07
652	O76094	Signal recognition particle subunit SRP72	SRP72	75 kDa	✓			6	11	15	96798.2	4.38395e+06	8350757
653	Q8N543	Prolyl 3-hydroxylase OGFOD1	OGFOD1	63 kDa				5	12	15	753934	5.24681e+06	3864287
654	Q96PZ0	Pseudouridylate synthase 7 homolog	PUS7	75 kDa				4	13	15	616858	2.4785e+07	52391030
655	Q15642	Cdc42-interacting protein 4	TRIP10	68 kDa			✓	4	12	15	148042	1.09717e+07	2.41635e+07
656	Q9BQL6	Fermitin family homolog 1	FERMT1	77 kDa				4	13	15	610534	1.9747e+06	1925945
657	Q9BTE3	Mini-chromosome maintenance complex-binding protein	MCMBP	73 kDa	✓			4	12	15	1.02629e+06	3.70496e+07	51178160
658	Q9H7D0	Dedicator of cytokinesis protein 5	DOCK5	215 kDa				4	12	15		1.34255e+07	28284870
659	O95817	BAG family molecular chaperone regulator 3	BAG3	62 kDa				4	14	15		8000841	1.28698e+07
660	O43660	Pleiotropic regulator 1	PLRG1	57 kDa				4	14	15		7.7675e+07	1.26621e+08
661	Q2TAY7	WD40 repeat-containing protein SMU1	SMU1	58 kDa				4	14	15		1.22297e+08	4.56157e+06
662	O60216	Double-strand-break repair protein rad21 homolog	RAD21	72 kDa				4	11	15		13540590	2.53139e+07
663	P55265	Double-stranded RNA-specific adenosine deaminase	ADAR	136 kDa				4	12	15		4.18321e+06	1.17912e+07
664	Q02241	Kinesin-like protein KIF23	KIF23	110 kDa				3	10	15		3.87616e+07	49043810
665	O60832	H/ACA ribonucleoprotein complex subunit DKC1	DKC1	58 kDa				3	13	15		1.66444e+07	25123540
666	P42166	Lamina-associated polypeptide 2, isoform alpha	TMPO	75 kDa				3	17	15		2.30491e+07	4.17152e+07
667	Q8IZ73	RNA pseudouridylate synthase domain-containing protein 2	RPUSD2	61 kDa				2	12	15		47686670	9.95424e+06
668	Q14160	Protein scribble homolog	SCRIB	175 kDa			✓	2	7	15		11374910	2.13063e+07
669	O95486	Protein transport protein Sec24A	SEC24A	120 kDa				0	12	15		5.58783e+07	5.61197e+07
670	P55010	Eukaryotic translation initiation factor 5	EIF5	49 kDa				0	14	15		150118800	3.36047e+08
671	P17858	ATP-dependent 6-phosphofructokinase, liver type	PFKL	85 kDa			✓	0	14	15		5702471	1.8923e+07
672	P54619	5'-AMP-activated protein kinase subunit gamma-1	PRKAG1	38 kDa				0	15	15		4239838	8.34834e+06
673	Q9Y2W2	WW domain-binding protein 11	WBP11	70 kDa				0	14	15		5667324	1.17781e+07
674	O15042	U2 snRNP-associated SURP motif-containing protein	U2SURP	118 kDa				0	15	15		14778940	15944380
675	Q13769	THO complex subunit 5 homolog	THOC5	79 kDa				0	10	15		9.8691e+06	15579940
676	Q92990	Glomulin	GLMN	68 kDa				0	13	15		49416740	56901760
677	P20020	Plasma membrane calcium-transporting ATPase 1	ATP2B1	135 kDa			✓	0	14	15		14775150	2.94711e+07
678	Q9NRF8	CTP synthase 2	CTPS2	66 kDa				0	15	15		21662240	3.65806e+07
679	Q9UKF6	Cleavage and polyadenylation specificity factor subunit 3	CPSF3	77 kDa				0	14	15		3.83638e+06	6111906
680	Q9UKG1	DCC-interacting protein 13-alpha	APPL1	80 kDa			✓	0	13	15		61456160	109979700
681	O00232	26S proteasome non-ATPase regulatory subunit 12	PSMD12	53 kDa			✓	0	12	15		3881584	6.11227e+06
682	Q92888	Rho guanine nucleotide exchange factor 1	ARHGEF1	102 kDa				0	13	15		3924466	8.18816e+06
683	O95352	Ubiquitin-like modifier-activating enzyme ATG7	ATG7	78 kDa				0	15	15		6281626	1.48797e+07
684	Q9BVJ6	U3 small nucleolar RNA-associated protein 14 homolog A	UTP14A	88 kDa				0	9	15		7.57564e+06	15977600
685	Q9H900	Protein zwilch homolog	ZWILCH	67 kDa				0	12	15		9790870	3030255
686	P19174	1-phosphatidylinositol 4,5-bisphosphate phosphodiesterase gamma-1	PLCG1	149 kDa				0	8	15		614917	1677483
687	Q8IWZ3	Ankyrin repeat and KH domain-containing protein 1	ANKHD1	269 kDa				0	13	15		6.92962e+06	22807830
688	Q7Z2Z2	Elongation factor-like GTPase 1	EFL1	125 kDa				0	12	15		8131105	1.47243e+07
689	Q9BTC0	Death-inducer obliterator 1	DIDO1	244 kDa				0	11	15		2.6385e+07	5.03937e+07
690	Q08752	Peptidyl-prolyl cis-trans isomerase D	PPID	41 kDa				0	14	15		1.92409e+06	1956563
691	P36871	Phosphoglucomutase-1	PGM1	61 kDa			✓	0	16	15		5.04795e+06	10140872
692	Q13136	Liprin-alpha-1	PPFIA1	136 kDa				0	10	15		3.05795e+06	4.72821e+06
693	P52735	Guanine nucleotide exchange factor VAV2	VAV2	101 kDa				0	7	15		1.63213e+07	2.81763e+07
694	Q9H6S3	Epidermal growth factor receptor kinase substrate 8-like protein 2	EPS8L2	81 kDa			✓	0	11	15		3.76341e+06	2.21789e+07
695	Q9H9A6	Leucine-rich repeat-containing protein 40	LRRC40	68 kDa				0	14	15		4.64132e+06	6531787
696	Q9UBF2	Coatomer subunit gamma-2	COPG2	98 kDa				0	15	15		4.5746e+06	12391550
697	Q99575	Ribonucleases P/MRP protein subunit POP1	POP1	115 kDa				0	9	15		3.47094e+06	7.71155e+06
698	Q86TI2	Dipeptidyl peptidase 9	DPP9	98 kDa				0	13	15		7018449	1.69311e+07
699	Q9H1H9	Kinesin-like protein KIF13A	KIF13A	202 kDa				0	13	15		1.69036e+06	3.1399e+06
700	P53675	Clathrin heavy chain 2	CLTCL1	187 kDa			✓	0	15	15		891981	1535504
701	Q8N8S7	Protein enabled homolog	ENAH	67 kDa				0	15	15		3866421	3.91491e+07
702	Q12830	Nucleosome-remodeling factor subunit BPTF	BPTF	338 kDa			✓	0	5	15		813424	4.96077e+06
703	Q14966	Zinc finger protein 638	ZNF638	221 kDa				0	8	15		3.49077e+06	9.08887e+06
704	Q8IWV8	E3 ubiquitin-protein ligase UBR2	UBR2	201 kDa				0	12	15		523504	5.89624e+06
705	O75962	Triple functional domain protein	TRIO	347 kDa				0	16	15			5411436
706	P50579	Methionine aminopeptidase 2	METAP2	53 kDa				0	0	15			2.38808e+06
707	P23246	Splicing factor, proline- and glutamine-rich	SFPQ	76 kDa				20	14	14	2.29887e+08	478528300	4.65394e+08
708	Q92945	Far upstream element-binding protein 2	KHSRP	73 kDa	✓			18	12	14	2.1713e+07	7.74737e+07	8.06313e+07
709	P04114	Apolipoprotein B-100	APOB	516 kDa		✓	✓	16	14	14	6809234	111544500	2.06936e+08
710	P07686	Beta-hexosaminidase subunit beta	HEXB	63 kDa		✓	✓	15	14	14	1.6689e+08	4.59619e+08	3.59374e+08
711	P06396	Gelsolin	GSN	86 kDa	✓	✓	✓	15	14	14	92265880	1.06715e+08	1.02677e+08
712	P07602	Prosaposin	PSAP	58 kDa		✓	✓	14	14	14	1.68701e+07	235203700	3.01749e+08
713	O00622	CCN family member 1	CCN1	42 kDa	✓	✓		14	13	14	30586400	7.78393e+07	76484060
714	Q16610	Extracellular matrix protein 1	ECM1	61 kDa		✓	✓	14	15	14	2.51972e+07	5.12551e+07	5.93639e+07
715	P54289	Voltage-dependent calcium channel subunit alpha-2/delta-1	CACNA2D1	125 kDa		✓	✓	14	15	14	8.09594e+06	9.07481e+07	1.05061e+08
716	Q99435	Protein kinase C-binding protein NELL2	NELL2	91 kDa		✓		14	14	14	9796424	1.27183e+08	151228700
717	Q08629	Testican-1	SPOCK1	49 kDa	✓	✓		13	13	14	5906777	7.83459e+07	9.52395e+07
718	P09923	Intestinal-type alkaline phosphatase	ALPI	57 kDa		✓		13	14	14	1.18174e+08	2.29667e+08	200371900
719	Q9UM47	Neurogenic locus notch homolog protein 3	NOTCH3	244 kDa		✓		13	14	14	1.54393e+08	432419600	829928500
720	P09871	Complement C1s subcomponent	C1S	77 kDa		✓		12	13	14	8.49779e+07	1.85216e+08	143877200
721	P22234	Multifunctional protein ADE2	PAICS	47 kDa			✓	12	14	14	2250871000	5.98451e+07	34263010
722	O43172	U4/U6 small nuclear ribonucleoprotein Prp4	PRPF4	58 kDa				12	12	14	525587	10314700	1.40337e+07
723	Q9BZZ5	Apoptosis inhibitor 5	API5	59 kDa				12	24	14	6.20962e+06	57934260	1.03864e+08
724	Q8NBJ4	Golgi membrane protein 1	GOLM1	45 kDa				11	14	14	1.45564e+07	5.2003e+07	7.42819e+07
725	P02533	Keratin, type I cytoskeletal 14	KRT14	52 kDa			✓	11	13	14	33973550	3.07615e+07	1.8235e+07
726	Q9NZV1	Cysteine-rich motor neuron 1 protein	CRIM1	114 kDa	✓	✓		10	14	14	3.11633e+06	2.22529e+06	2.18587e+06
727	P30041	Peroxiredoxin-6	PRDX6	25 kDa			✓	10	14	14	1.43947e+06	3.60305e+06	1.21842e+06
728	Q9UGI8	Testin	TES	48 kDa				10	13	14	23543500	2.11216e+07	1.64186e+07
729	O94826	Mitochondrial import receptor subunit TOM70	TOMM70	67 kDa			✓	10	12	14	1.45961e+07	68239340	118548600
730	P27695	DNA-(apurinic or apyrimidinic site) lyase	APEX1	36 kDa				9	12	14	1.86614e+06	1.01855e+06	5.14972e+06
731	P54578	Ubiquitin carboxyl-terminal hydrolase 14	USP14	56 kDa			✓	9	13	14	6407744	4.53474e+07	4.41804e+07
732	P47712	Cytosolic phospholipase A2	PLA2G4A	85 kDa				8	13	14	534290	5.79009e+06	11632880
733	O14936	Peripheral plasma membrane protein CASK	CASK	105 kDa				8	13	14	3441622	2.10997e+07	67410140
734	Q16719	Kynureninase	KYNU	52 kDa				7	13	14	763775	6083050	1.24972e+07
735	Q13263	Transcription intermediary factor 1-beta	TRIM28	89 kDa	✓			7	11	14	1.08442e+07	9.96958e+06	9.63963e+06
736	P63151	Serine/threonine-protein phosphatase 2A 55 kDa regulatory subunit B alpha isoform	PPP2R2A	52 kDa	✓			7	14	14	1.92419e+06	3.59043e+07	64212170
737	P52292	Importin subunit alpha-1	KPNA2	58 kDa	✓			6	11	14	1.03623e+06	1.20868e+07	2.77349e+07
738	Q06203	Amidophosphoribosyltransferase	PPAT	57 kDa				6	12	14	76703.6	7.54381e+06	20769850
739	O43237	Cytoplasmic dynein 1 light intermediate chain 2	DYNC1LI2	54 kDa				6	14	14	748384	1.40014e+07	2.72387e+07
740	P36915	Guanine nucleotide-binding protein-like 1	GNL1	69 kDa				6	11	14		4.53884e+07	87100150
741	Q92769	Histone deacetylase 2	HDAC2	55 kDa				6	12	14		2.11249e+08	322238700
742	Q9BUJ2	Heterogeneous nuclear ribonucleoprotein U-like protein 1	HNRNPUL1	96 kDa				6	11	14		1.63414e+07	31694510
743	Q9NTZ6	RNA-binding protein 12	RBM12	97 kDa				6	13	14		4.99512e+06	1.25677e+07
744	Q14247	Src substrate cortactin	CTTN	62 kDa	✓			5	13	14		4.19201e+06	7211115
745	Q8N1G4	Leucine-rich repeat-containing protein 47	LRRC47	63 kDa				5	14	14		23528430	3.19749e+07
746	O95831	Apoptosis-inducing factor 1, mitochondrial	AIFM1	67 kDa		✓		4	12	14		1.58544e+07	2.96347e+07
747	Q53GS9	U4/U6.U5 tri-snRNP-associated protein 2	USP39	65 kDa				4	13	14		3.25237e+07	6.09851e+07
748	Q9H2U2	Inorganic pyrophosphatase 2, mitochondrial	PPA2	38 kDa				3	11	14		1.70928e+07	2.41087e+07
749	Q1KMD3	Heterogeneous nuclear ribonucleoprotein U-like protein 2	HNRNPUL2	85 kDa				3	12	14		7.27513e+06	14211900
750	Q8TAF3	WD repeat-containing protein 48	WDR48	76 kDa				3	9	14		1.15278e+07	1.23004e+07
751	Q99543	DnaJ homolog subfamily C member 2	DNAJC2	72 kDa				2	11	14		2.36718e+07	44825430
752	Q9Y606	tRNA pseudouridine synthase A	PUS1	47 kDa				2	15	14		1.37641e+07	2.75125e+07
753	Q9NW13	RNA-binding protein 28	RBM28	86 kDa				1	8	14		4.45133e+07	35714300
754	Q9Y450	HBS1-like protein	HBS1L	75 kDa			✓	1	12	14		4.20922e+07	4.28281e+07
755	Q13098	COP9 signalosome complex subunit 1	GPS1	56 kDa				0	12	14		3.43078e+06	5218093
756	Q6PJT7	Zinc finger CCCH domain-containing protein 14	ZC3H14	83 kDa				0	11	14		3193166	5085236
757	Q16666	Gamma-interferon-inducible protein 16	IFI16	88 kDa				0	13	14		16250710	2.16141e+07
758	Q15061	WD repeat-containing protein 43	WDR43	75 kDa				0	10	14		7.24315e+06	1.29058e+07
759	Q32P44	Echinoderm microtubule-associated protein-like 3	EML3	95 kDa				0	10	14		294043	62804470
760	Q9UHB6	LIM domain and actin-binding protein 1	LIMA1	85 kDa				0	12	14		8.64208e+06	1.80399e+07
761	Q9H9T3	Elongator complex protein 3	ELP3	62 kDa				0	13	14		5.08538e+06	8.64309e+06
762	Q9NR50	Translation initiation factor eIF-2B subunit gamma	EIF2B3	50 kDa				0	10	14		9.08313e+06	1.76619e+07
763	Q8IX12	Cell division cycle and apoptosis regulator protein 1	CCAR1	133 kDa				0	10	14		1.09713e+07	2.42597e+07
764	P15170	Eukaryotic peptide chain release factor GTP-binding subunit ERF3A	GSPT1	56 kDa				0	13	14		9.01541e+06	1.37342e+07
765	Q8NEB9	Phosphatidylinositol 3-kinase catalytic subunit type 3	PIK3C3	102 kDa				0	13	14		2305075	3.79847e+06
766	Q96JB5	CDK5 regulatory subunit-associated protein 3	CDK5RAP3	57 kDa				0	14	14		4.26737e+06	11795510
767	Q9NXV6	CDKN2A-interacting protein	CDKN2AIP	61 kDa				0	10	14		8.3995e+06	1.19503e+07
768	Q8TD19	Serine/threonine-protein kinase Nek9	NEK9	107 kDa				0	14	14		6.11167e+06	1.07732e+07
769	Q92995	Ubiquitin carboxyl-terminal hydrolase 13	USP13	97 kDa				0	10	14		8.13279e+06	1.12325e+07
770	Q8NI36	WD repeat-containing protein 36	WDR36	105 kDa				0	13	14		9.51093e+06	1.67543e+07
771	Q86U44	N6-adenosine-methyltransferase catalytic subunit	METTL3	64 kDa				0	11	14		972472	4.0054e+06
772	Q86UK7	E3 ubiquitin-protein ligase ZNF598	ZNF598	99 kDa				0	12	14		8436789	1.46194e+07
773	Q96T58	Msx2-interacting protein	SPEN	402 kDa			✓	0	7	14		1.18941e+07	1.54667e+07
774	O75152	Zinc finger CCCH domain-containing protein 11A	ZC3H11A	89 kDa				0	10	14		8.56701e+06	8.33242e+06
775	O00203	AP-3 complex subunit beta-1	AP3B1	121 kDa				0	15	14		1.64332e+07	1.92797e+07
776	P49790	Nuclear pore complex protein Nup153	NUP153	154 kDa				0	9	14		3.30922e+06	6.29163e+06
777	Q9Y6K5	2'-5'-oligoadenylate synthase 3	OAS3	121 kDa				0	11	14		1.6322e+06	1.29476e+06
778	Q99570	Phosphoinositide 3-kinase regulatory subunit 4	PIK3R4	153 kDa				0	9	14		4.76246e+06	5784841
779	P49641	Alpha-mannosidase 2x	MAN2A2	131 kDa				0	13	14		2.97156e+06	5.88182e+06
780	Q5JRA6	Transport and Golgi organization protein 1 homolog	MIA3	214 kDa		✓		0	12	14		3.74947e+06	7.12681e+06
781	P82094	TATA element modulatory factor	TMF1	123 kDa				0	7	14		5.02198e+06	8.73786e+06
782	Q8WVM7	Cohesin subunit SA-1	STAG1	144 kDa				0	8	14		6.75713e+06	1.11947e+07
783	Q8IWA0	WD repeat-containing protein 75	WDR75	95 kDa				0	14	14		2.93153e+06	3346726
784	Q5SRE5	Nucleoporin NUP188 homolog	NUP188	196 kDa				0	9	14		3.30961e+07	6.25387e+07
785	Q9Y3F4	Serine-threonine kinase receptor-associated protein	STRAP	38 kDa				0	12	14		519112	2.95527e+06
786	Q15021	Condensin complex subunit 1	NCAPD2	157 kDa				0	5	14		1.25305e+06	2.56493e+06
787	Q8WXI7	Mucin-16	MUC16	1519 kDa			✓	0	6	14		1.25111e+06	5.00523e+06
788	Q9UPQ9	Trinucleotide repeat-containing gene 6B protein	TNRC6B	194 kDa				0	7	14		1585161	4.29068e+06
789	Q9UPY3	Endoribonuclease Dicer	DICER1	219 kDa			✓	0	9	14		863482	2.86753e+06
790	Q9NZN3	EH domain-containing protein 3	EHD3	61 kDa				0	16	14		2118825	8327804
791	Q9H1A4	Anaphase-promoting complex subunit 1	ANAPC1	217 kDa				0	7	14		1422605	2.73538e+06
792	O14981	TATA-binding protein-associated factor 172	BTAF1	207 kDa				0	4	14			183804900
793	Q9Y6G9	Cytoplasmic dynein 1 light intermediate chain 1	DYNC1LI1	57 kDa				0	0	14			1.48632e+07
794	Q16513	Serine/threonine-protein kinase N2	PKN2	112 kDa				0	0	14			1.47317e+07
795	P28370	Probable global transcription activator SNF2L1	SMARCA1	123 kDa				0	22	14			2860977
796	P51149	Ras-related protein Rab-7a	RAB7A	23 kDa			✓	22	13	13	7403682	89527230	1.24847e+08
797	Q16181	Septin-7	SEPTIN7	51 kDa			✓	20	13	13	1.68549e+09	3794020000	2.4314e+09
798	O43852	Calumenin	CALU	37 kDa		✓		20	13	13	1.47482e+08	1.12101e+08	7.42119e+07
799	P09651	Heterogeneous nuclear ribonucleoprotein A1	HNRNPA1	39 kDa			✓	16	24	13	3.20226e+07	302899300	7.08284e+08
800	P00558	Phosphoglycerate kinase 1	PGK1	45 kDa			✓	15	15	13	4834516	8567186	8.07266e+06
801	Q13418	Integrin-linked protein kinase	ILK	51 kDa				14	13	13	1.43726e+07	1.1482e+08	208608900
802	Q14766	Latent-transforming growth factor beta-binding protein 1	LTBP1	187 kDa		✓		14	14	13	2.65705e+07	2.46941e+07	2.2241e+07
803	O95980	Reversion-inducing cysteine-rich protein with Kazal motifs	RECK	106 kDa		✓		14	14	13	7748500	3.37691e+07	32123570
804	P48426	Phosphatidylinositol 5-phosphate 4-kinase type-2 alpha	PIP4K2A	46 kDa				13	13	13	7.88917e+06	8.03137e+07	1.5286e+08
805	Q05707	Collagen alpha-1(XIV) chain	COL14A1	194 kDa		✓		13	13	13	2725249	3.0146e+07	58239580
806	Q9HCB6	Spondin-1	SPON1	91 kDa	✓	✓		13	14	13	6.57227e+06	9.8486e+07	9.12939e+07
807	Q32P28	Prolyl 3-hydroxylase 1	P3H1	83 kDa		✓	✓	12	12	13	5.09825e+06	7.74077e+07	165112200
808	O00462	Beta-mannosidase	MANBA	101 kDa		✓		12	13	13	8.96765e+06	2.04124e+07	21314470
809	P54920	Alpha-soluble NSF attachment protein	NAPA	33 kDa			✓	12	13	13	3942005	9.03718e+07	2.55102e+08
810	P80303	Nucleobindin-2	NUCB2	50 kDa		✓	✓	11	12	13	2.60409e+06	1.38917e+07	32398070
811	Q99574	Neuroserpin	SERPINI1	46 kDa		✓	✓	11	13	13	1.0187e+07	1.92253e+07	23463530
812	P26641	Elongation factor 1-gamma	EEF1G	50 kDa	✓		✓	10	11	13	4.78013e+06	5.7495e+06	2.84247e+06
813	Q6UY14	ADAMTS-like protein 4	ADAMTSL4	117 kDa		✓		10	14	13	2.22084e+07	3.24195e+07	44275990
814	P10909	Clusterin	CLU	52 kDa	✓	✓	✓	9	13	13	5.44013e+06	4.43177e+07	102272640
815	P07225	Vitamin K-dependent protein S	PROS1	75 kDa	✓	✓	✓	9	12	13	1368118	1.471e+07	20005770
816	O43175	D-3-phosphoglycerate dehydrogenase	PHGDH	57 kDa			✓	9	13	13	1.54565e+06	20628170	3.5055e+07
817	Q9UBB4	Ataxin-10	ATXN10	53 kDa	✓			9	13	13	3.95133e+06	2.0812e+07	2.63456e+07
818	Q14703	Membrane-bound transcription factor site-1 protease	MBTPS1	118 kDa		✓		9	12	13	3.68494e+06	4.9649e+07	9.80754e+07
819	Q13283	Ras GTPase-activating protein-binding protein 1	G3BP1	52 kDa				8	13	13	3.5916e+06	9.3674e+06	17529830
820	Q9Y266	Nuclear migration protein nudC	NUDC	38 kDa				8	11	13	1.99667e+06	16119490	5.07552e+07
821	P00491	Purine nucleoside phosphorylase	PNP	32 kDa			✓	8	13	13	10092838	22218180	1.84444e+07
822	O00567	Nucleolar protein 56	NOP56	66 kDa				8	13	13	1.79622e+07	3.14656e+07	33747720
823	P50995	Annexin A11	ANXA11	54 kDa			✓	8	12	13	2.28049e+06	3.74004e+06	3.06735e+06
824	P34896	Serine hydroxymethyltransferase, cytosolic	SHMT1	53 kDa			✓	8	13	13	9.52055e+06	8.96393e+06	8.16414e+06
825	O75688	Protein phosphatase 1B	PPM1B	53 kDa				8	10	13	2.46479e+06	2.59844e+07	53170600
826	O15372	Eukaryotic translation initiation factor 3 subunit H	EIF3H	40 kDa			✓	8	12	13	2728861	9880537	17168670
827	P34897	Serine hydroxymethyltransferase, mitochondrial	SHMT2	56 kDa			✓	8	11	13	710695	13116430	1.52323e+07
828	Q96T51	RUN and FYVE domain-containing protein 1	RUFY1	80 kDa				8	14	13	899926	3552619	1917864
829	P23381	Tryptophan--tRNA ligase, cytoplasmic	WARS1	53 kDa			✓	7	12	13	550647	2.11731e+07	32270110
830	Q99598	Translin-associated protein X	TSNAX	33 kDa	✓			7	12	13	212728	1.63668e+06	2.27841e+06
831	P35237	Serpin B6	SERPINB6	43 kDa			✓	7	13	13	353121	1.01633e+07	2.51327e+07
832	P49419	Alpha-aminoadipic semialdehyde dehydrogenase	ALDH7A1	58 kDa			✓	7	13	13	165431	2.90224e+06	4.51599e+06
833	Q13867	Bleomycin hydrolase	BLMH	53 kDa			✓	6	12	13	112348	171127	495284
834	P56199	Integrin alpha-1	ITGA1	131 kDa		✓	✓	6	10	13	252122	2.26982e+07	2.12918e+07
835	O15355	Protein phosphatase 1G	PPM1G	59 kDa	✓			6	12	13	7.7968e+06	8.88573e+06	2.63646e+06
836	Q9NYU1	UDP-glucose:glycoprotein glucosyltransferase 2	UGGT2	175 kDa		✓		6	14	13	1595148	1.96012e+07	2.87915e+07
837	Q9UNZ2	NSFL1 cofactor p47	NSFL1C	41 kDa				6	12	13	652316	10218073	2.25269e+07
838	Q13547	Histone deacetylase 1	HDAC1	55 kDa	✓			6	10	13	311156	5303674	1.92e+07
839	P78362	SRSF protein kinase 2	SRPK2	78 kDa				6	12	13	453143	3.47178e+06	3.21852e+06
840	Q9UNE7	E3 ubiquitin-protein ligase CHIP	STUB1	35 kDa				6	9	13	2.8395e+06	42777440	6.55748e+07
841	Q96HC4	PDZ and LIM domain protein 5	PDLIM5	64 kDa	✓			5	12	13	198560	17240060	3.06471e+07
842	P10155	60 kDa SS-A/Ro ribonucleoprotein	RO60	61 kDa				5	12	13	2.64518e+07	2.41376e+07	2.40765e+07
843	Q9UNA0	A disintegrin and metalloproteinase with thrombospondin motifs 5	ADAMTS5	102 kDa		✓		5	13	13		1.49984e+07	2.32192e+07
844	P40123	Adenylyl cyclase-associated protein 2	CAP2	53 kDa	✓			5	10	13		4.34158e+06	9.57853e+06
845	Q9UHD1	Cysteine and histidine-rich domain-containing protein 1	CHORDC1	37 kDa				4	12	13		4.72649e+07	5.36219e+07
846	P18754	Regulator of chromosome condensation	RCC1	45 kDa	✓			4	13	13		5.35483e+07	7.25465e+07
847	O60256	Phosphoribosyl pyrophosphate synthase-associated protein 2	PRPSAP2	41 kDa				4	12	13		21628080	3.81387e+07
848	Q8NBJ5	Procollagen galactosyltransferase 1	COLGALT1	72 kDa		✓		4	10	13		1.16425e+07	30848980
849	Q9H6T3	RNA polymerase II-associated protein 3	RPAP3	76 kDa				4	9	13		8.77177e+06	15038380
850	Q12849	G-rich sequence factor 1	GRSF1	53 kDa				4	9	13		1.32885e+07	2.60177e+07
851	P51659	Peroxisomal multifunctional enzyme type 2	HSD17B4	80 kDa	✓			3	12	13		679164	68059800
852	Q15785	Mitochondrial import receptor subunit TOM34	TOMM34	35 kDa				3	12	13		1.43141e+07	2.15436e+07
853	Q7Z417	Nuclear fragile X mental retardation-interacting protein 2	NUFIP2	76 kDa				3	12	13		1.00543e+08	1.11997e+08
854	Q13425	Beta-2-syntrophin	SNTB2	58 kDa				2	12	13		2.10885e+07	3.30384e+07
855	Q6NZY4	Zinc finger CCHC domain-containing protein 8	ZCCHC8	79 kDa				0	10	13		16262320	2.74734e+07
856	P49593	Protein phosphatase 1F	PPM1F	50 kDa				0	11	13		3.06844e+07	4.58317e+07
857	Q6P1J9	Parafibromin	CDC73	61 kDa				0	15	13		6.84496e+06	6274889
858	Q4G0J3	La-related protein 7	LARP7	67 kDa				0	11	13		1.56011e+07	9.63235e+06
859	Q15008	26S proteasome non-ATPase regulatory subunit 6	PSMD6	46 kDa				0	14	13		12780360	2.16186e+07
860	Q9BY44	Eukaryotic translation initiation factor 2A	EIF2A	65 kDa				0	13	13		1.92987e+07	3.6508e+07
861	Q9NW82	WD repeat-containing protein 70	WDR70	73 kDa				0	10	13		2.1196e+07	40766920
862	Q96RP9	Elongation factor G, mitochondrial	GFM1	83 kDa				0	13	13		10151651	1.48533e+07
863	Q5VT52	Regulation of nuclear pre-mRNA domain-containing protein 2	RPRD2	156 kDa				0	12	13		5124824	5.85325e+06
864	Q5T0F9	Coiled-coil and C2 domain-containing protein 1B	CC2D1B	94 kDa				0	11	13		4812687	7282933
865	Q14126	Desmoglein-2	DSG2	122 kDa		✓	✓	0	11	13		6621421	8.97723e+06
866	Q9UPT5	Exocyst complex component 7	EXOC7	83 kDa				0	11	13		1.2704e+07	2.08277e+07
867	Q9UID3	Vacuolar protein sorting-associated protein 51 homolog	VPS51	86 kDa				0	11	13		6.23855e+06	1.00397e+07
868	Q9NX74	tRNA-dihydrouridine(20) synthase [NAD(P)+]-like	DUS2	55 kDa				0	10	13		3.17525e+06	5775146
869	Q9H307	Pinin	PNN	82 kDa				0	12	13		1.71254e+07	25785950
870	Q99590	Protein SCAF11	SCAF11	165 kDa				0	10	13		737762	3.24595e+06
871	Q8NI08	Nuclear receptor coactivator 7	NCOA7	106 kDa				0	11	13		6.98047e+06	11848930
872	Q9UKV3	Apoptotic chromatin condensation inducer in the nucleus	ACIN1	152 kDa				0	12	13		20908920	38095290
873	P23634	Plasma membrane calcium-transporting ATPase 4	ATP2B4	138 kDa				0	6	13		3912095	7332356
874	Q8N163	Cell cycle and apoptosis regulator protein 2	CCAR2	103 kDa				0	12	13		1.17541e+07	1.20795e+07
875	Q9UJX5	Anaphase-promoting complex subunit 4	ANAPC4	92 kDa				0	12	13		6.53571e+06	8.32239e+06
876	Q8N142	Adenylosuccinate synthetase isozyme 1	ADSS1	50 kDa				0	11	13		2.00178e+06	2300937
877	Q6PGP7	Tetratricopeptide repeat protein 37	TTC37	175 kDa				0	10	13		1.60076e+07	21279390
878	Q13177	Serine/threonine-protein kinase PAK 2	PAK2	58 kDa				0	12	13		3222579	4.18421e+06
879	Q15386	Ubiquitin-protein ligase E3C	UBE3C	124 kDa				0	7	13		1.25205e+07	17697580
880	Q96FV9	THO complex subunit 1	THOC1	76 kDa				0	11	13		849452	3.35253e+06
881	Q12769	Nuclear pore complex protein Nup160	NUP160	162 kDa				0	7	13		454364	1.01908e+06
882	Q9H0S4	Probable ATP-dependent RNA helicase DDX47	DDX47	51 kDa				0	11	13		4.26598e+06	8.55497e+06
883	Q92805	Golgin subfamily A member 1	GOLGA1	88 kDa				0	9	13		3424735	3816763
884	P08243	Asparagine synthetase [glutamine-hydrolyzing]	ASNS	64 kDa				0	10	13		4.38423e+06	7875323
885	Q96AX1	Vacuolar protein sorting-associated protein 33A	VPS33A	68 kDa				0	7	13		2914964	5152001
886	P40818	Ubiquitin carboxyl-terminal hydrolase 8	USP8	128 kDa				0	11	13		788434	5203193
887	Q96EK7	Constitutive coactivator of peroxisome proliferator-activated receptor gamma	FAM120B	104 kDa				0	6	13		2.15546e+06	6585908
888	Q01968	Inositol polyphosphate 5-phosphatase OCRL	OCRL	104 kDa				0	11	13		4.95336e+06	8.5443e+06
889	O60885	Bromodomain-containing protein 4	BRD4	152 kDa				0	12	13		2321068	2.44955e+06
890	P48147	Prolyl endopeptidase	PREP	81 kDa				0	13	13		956797	2.92661e+06
891	Q9NVU0	DNA-directed RNA polymerase III subunit RPC5	POLR3E	80 kDa				0	6	13		3.28222e+06	5825929
892	P51784	Ubiquitin carboxyl-terminal hydrolase 11	USP11	110 kDa				0	10	13		1.87865e+06	7236349
893	O95786	Antiviral innate immune response receptor RIG-I	DDX58	107 kDa				0	6	13		26277.2	2.70249e+06
894	Q9UDY2	Tight junction protein ZO-2	TJP2	134 kDa				0	7	13		582589	1.33104e+06
895	O75955	Flotillin-1	FLOT1	47 kDa			✓	0	13	13		1649889	7.08422e+06
896	Q9BQG2	Peroxisomal NADH pyrophosphatase NUDT12	NUDT12	52 kDa				0	9	13		2112007	6.77761e+06
897	P29590	Protein PML	PML	98 kDa				0	7	13		64853.8	41891.3
898	O75096	Low-density lipoprotein receptor-related protein 4	LRP4	212 kDa		✓		0	8	13			649587400
899	Q9UHP3	Ubiquitin carboxyl-terminal hydrolase 25	USP25	122 kDa				0	8	13			5.48648e+06
900	P68366	Tubulin alpha-4A chain	TUBA4A	50 kDa			✓	22	12	12	3.21159e+06	3.19102e+07	55636780
901	P28482	Mitogen-activated protein kinase 1	MAPK1	41 kDa				22	22	12	1.3192e+07	1.48355e+07	19956350
902	Q15262	Receptor-type tyrosine-protein phosphatase kappa	PTPRK	162 kDa		✓		20	12	12	2.33737e+08	1.78347e+09	2161388000
903	Q13347	Eukaryotic translation initiation factor 3 subunit I	EIF3I	37 kDa	✓		✓	14	11	12	3.31259e+07	315183900	5.63813e+08
904	Q9UNN5	FAS-associated factor 1	FAF1	74 kDa				14	12	12	1.15783e+07	132554200	207002600
905	P02452	Collagen alpha-1(I) chain	COL1A1	139 kDa		✓		12	13	12	57298180	6.69638e+08	1057466300
906	P04259	Keratin, type II cytoskeletal 6B	KRT6B	60 kDa			✓	12	16	12	50137540	6.69153e+07	4.99786e+07
907	Q96SB4	SRSF protein kinase 1	SRPK1	74 kDa				12	10	12	3.71174e+06	46032220	7.62838e+07
908	P25685	DnaJ homolog subfamily B member 1	DNAJB1	38 kDa			✓	12	12	12	1.22836e+07	3.35391e+07	8.22647e+07
909	Q9UKU9	Angiopoietin-related protein 2	ANGPTL2	57 kDa	✓	✓	✓	11	12	12	3.77408e+06	8.37977e+06	5.03939e+07
910	Q99538	Legumain	LGMN	49 kDa	✓	✓	✓	11	12	12	497348	1.66798e+07	1.71111e+07
911	P13645	Keratin, type I cytoskeletal 10	KRT10	59 kDa			✓	11	12	12	3364070	9494853	1.06645e+07
912	O75891	Cytosolic 10-formyltetrahydrofolate dehydrogenase	ALDH1L1	99 kDa			✓	11	12	12	3.61059e+07	66817990	5.78303e+07
913	P12111	Collagen alpha-3(VI) chain	COL6A3	344 kDa		✓	✓	11	12	12	1.89227e+07	18366240	1.13104e+07
914	P02768	Serum albumin	ALB	69 kDa		✓	✓	11	9	12	23251200	5.38977e+07	81162300
915	P04406	Glyceraldehyde-3-phosphate dehydrogenase	GAPDH	36 kDa	✓		✓	10	12	12	1.10477e+06	1.83858e+07	2.5959e+07
916	P29692	Elongation factor 1-delta	EEF1D	31 kDa				10	11	12	1.20012e+06	1.95096e+07	3.67648e+07
917	Q96AE4	Far upstream element-binding protein 1	FUBP1	68 kDa	✓			10	12	12	9.43515e+06	10718160	4747158
918	Q58FF8	Putative heat shock protein HSP 90-beta 2	HSP90AB2P	44 kDa			✓	10	10	12	519598	9.44258e+06	2.04501e+07
919	P17936	Insulin-like growth factor-binding protein 3	IGFBP3	32 kDa		✓		10	10	12	2.15445e+08	331908900	2.38868e+08
920	Q13510	Acid ceramidase	ASAH1	45 kDa		✓	✓	10	11	12	9.25818e+06	2.65332e+07	30561130
921	Q9BS26	Endoplasmic reticulum resident protein 44	ERP44	47 kDa		✓	✓	10	10	12	9.91492e+06	20857860	20303450
922	O95433	Activator of 90 kDa heat shock protein ATPase homolog 1	AHSA1	38 kDa			✓	10	11	12	1.75994e+06	10895256	1.58968e+07
923	O14672	Disintegrin and metalloproteinase domain-containing protein 10	ADAM10	84 kDa		✓	✓	10	11	12	3193113	5.7948e+07	9.66483e+07
924	P49591	Serine--tRNA ligase, cytoplasmic	SARS1	59 kDa			✓	10	11	12	1.35569e+07	4.17405e+07	2.93797e+07
925	Q16576	Histone-binding protein RBBP7	RBBP7	48 kDa				9	12	12	208124600	2.58728e+08	1.39595e+09
926	P53041	Serine/threonine-protein phosphatase 5	PPP5C	57 kDa				9	9	12	1.45887e+07	21319730	2.0013e+07
927	Q8NBS9	Thioredoxin domain-containing protein 5	TXNDC5	48 kDa		✓	✓	9	9	12	2809250	3.59662e+07	3.48168e+07
928	P31153	S-adenosylmethionine synthase isoform type-2	MAT2A	44 kDa	✓			9	12	12	913387	43878.8	281236
929	P16278	Beta-galactosidase	GLB1	76 kDa	✓	✓	✓	9	11	12	3.23789e+06	3.8432e+07	71599690
930	P61160	Actin-related protein 2	ACTR2	45 kDa			✓	9	11	12	67599	1.3324e+07	8.56639e+06
931	Q06323	Proteasome activator complex subunit 1	PSME1	29 kDa			✓	8	12	12	45160.8	1.11273e+07	2.44127e+07
932	Q00839	Heterogeneous nuclear ribonucleoprotein U	HNRNPU	91 kDa				8	12	12	376324	9.88353e+06	23818520
933	P30419	Glycylpeptide N-tetradecanoyltransferase 1	NMT1	57 kDa	✓			8	11	12	1345030	1.42835e+07	19786800
934	P30084	Enoyl-CoA hydratase, mitochondrial	ECHS1	31 kDa				7	10	12	477127	7386382	2.08875e+07
935	P27824	Calnexin	CANX	68 kDa		✓	✓	7	10	12	161522	1.73537e+06	39626870
936	Q86SF2	N-acetylgalactosaminyltransferase 7	GALNT7	75 kDa			✓	7	10	12	101398	5302277	7.27226e+06
937	O00148	ATP-dependent RNA helicase DDX39A	DDX39A	49 kDa				7	10	12	412570	2.8555e+07	4.64902e+07
938	Q13564	NEDD8-activating enzyme E1 regulatory subunit	NAE1	60 kDa				7	12	12	1.84616e+06	7.35443e+06	1.47481e+07
939	O14964	Hepatocyte growth factor-regulated tyrosine kinase substrate	HGS	86 kDa			✓	7	11	12	626217	6.55879e+07	100955410
940	P46063	ATP-dependent DNA helicase Q1	RECQL	73 kDa				6	12	12	148494	6.32177e+06	6.22363e+06
941	Q9H3P7	Golgi resident protein GCP60	ACBD3	61 kDa				6	8	12	17199.7	6.55527e+06	6.54381e+06
942	Q12797	Aspartyl/asparaginyl beta-hydroxylase	ASPH	86 kDa	✓			6	9	12	314897	16631860	2.61112e+07
943	Q8IV38	Ankyrin repeat and MYND domain-containing protein 2	ANKMY2	49 kDa				6	12	12	816512	2.09386e+07	40095160
944	Q4G0N4	NAD kinase 2, mitochondrial	NADK2	49 kDa	✓			6	11	12	1.4091e+06	1.43373e+06	3.11471e+06
945	Q8N122	Regulatory-associated protein of mTOR	RPTOR	149 kDa				6	10	12	433355	8.42678e+06	1.03668e+07
946	Q12996	Cleavage stimulation factor subunit 3	CSTF3	83 kDa				6	14	12	787479	886050	1.91355e+06
947	Q05397	Focal adhesion kinase 1	PTK2	119 kDa				6	14	12	362453	7700243	1.76653e+07
948	Q9Y2Z0	Protein SGT1 homolog	SUGT1	41 kDa				5	12	12	742328	3919930	1.0589e+07
949	Q9UJU6	Drebrin-like protein	DBNL	48 kDa	✓		✓	5	11	12	220420	4.99993e+06	10228026
950	Q96DI7	U5 small nuclear ribonucleoprotein 40 kDa protein	SNRNP40	39 kDa				5	9	12	527461	12734950	20792360
951	P48163	NADP-dependent malic enzyme	ME1	64 kDa				5	13	12	64727.6	2777707	8.62942e+06
952	Q9Y2T3	Guanine deaminase	GDA	51 kDa				5	12	12	201080	4.79995e+06	6924473
953	P19971	Thymidine phosphorylase	TYMP	50 kDa				4	12	12	744447	1.44364e+07	22155390
954	P31040	Succinate dehydrogenase [ubiquinone] flavoprotein subunit, mitochondrial	SDHA	73 kDa				4	12	12	730738	1.14499e+07	1.91886e+07
955	Q27J81	Inverted formin-2	INF2	136 kDa				4	12	12		2.7344e+06	7255691
956	Q13561	Dynactin subunit 2	DCTN2	44 kDa			✓	4	11	12		1.28856e+06	1.52818e+06
957	Q14914	Prostaglandin reductase 1	PTGR1	36 kDa			✓	4	9	12		3493241	1.07204e+06
958	Q14157	Ubiquitin-associated protein 2-like	UBAP2L	115 kDa				4	12	12		7608122	2.90434e+07
959	P35659	Protein DEK	DEK	43 kDa				4	10	12		3.18809e+07	57687360
960	O75400	Pre-mRNA-processing factor 40 homolog A	PRPF40A	109 kDa				4	9	12		9.66729e+07	1.59007e+08
961	Q69YN2	CWF19-like protein 1	CWF19L1	61 kDa				3	10	12		1.73148e+08	3.1772e+08
962	O43818	U3 small nucleolar RNA-interacting protein 2	RRP9	52 kDa				3	11	12		1.33554e+07	2.51438e+07
963	Q8TDN6	Ribosome biogenesis protein BRX1 homolog	BRIX1	41 kDa	✓			3	9	12		12446950	18676690
964	P30740	Leukocyte elastase inhibitor	SERPINB1	43 kDa			✓	3	11	12		14224370	2.14199e+07
965	Q15813	Tubulin-specific chaperone E	TBCE	59 kDa				2	8	12		47431690	71395500
966	Q9HCD5	Nuclear receptor coactivator 5	NCOA5	66 kDa				2	9	12		1.82066e+07	3.30528e+07
967	Q13112	Chromatin assembly factor 1 subunit B	CHAF1B	61 kDa				2	9	12		2.31892e+06	1.45552e+06
968	Q9Y4P3	Transducin beta-like protein 2	TBL2	50 kDa				2	11	12		5197329	8.58341e+06
969	Q9UG63	ATP-binding cassette sub-family F member 2	ABCF2	71 kDa				2	11	12		4.6681e+07	97996450
970	Q15811	Intersectin-1	ITSN1	195 kDa				2	9	12		1.05641e+07	1.74538e+07
971	Q86VM9	Zinc finger CCCH domain-containing protein 18	ZC3H18	106 kDa				1	8	12		8.35204e+06	2.14674e+07
972	P52209	6-phosphogluconate dehydrogenase, decarboxylating	PGD	53 kDa			✓	0	14	12		1.23771e+07	3.7987e+07
973	Q96GM5	SWI/SNF-related matrix-associated actin-dependent regulator of chromatin subfamily D member 1	SMARCD1	58 kDa				0	9	12		1.02852e+07	13402890
974	Q14181	DNA polymerase alpha subunit B	POLA2	66 kDa				0	11	12		2.80251e+06	2333266
975	Q9H078	Caseinolytic peptidase B protein homolog	CLPB	79 kDa				0	11	12		5.6935e+06	19274310
976	Q86XA9	HEAT repeat-containing protein 5A	HEATR5A	222 kDa				0	11	12		2.96481e+07	2.57123e+07
977	Q9UHB7	AF4/FMR2 family member 4	AFF4	127 kDa				0	9	12		2037248	4.13329e+06
978	Q13287	N-myc-interactor	NMI	35 kDa				0	11	12		4.93232e+06	11479920
979	Q86W42	THO complex subunit 6 homolog	THOC6	38 kDa				0	9	12		2062787	5.84495e+06
980	Q9NWT1	p21-activated protein kinase-interacting protein 1	PAK1IP1	44 kDa				0	10	12		1.0557e+07	18785260
981	P13807	Glycogen [starch] synthase, muscle	GYS1	84 kDa				0	9	12		7.66934e+06	1.629e+07
982	A0MZ66	Shootin-1	SHTN1	72 kDa				0	11	12		1.22487e+07	21509010
983	O94875	Sorbin and SH3 domain-containing protein 2	SORBS2	124 kDa				0	8	12		4.81981e+06	1.02217e+07
984	P23368	NAD-dependent malic enzyme, mitochondrial	ME2	65 kDa				0	10	12		8878941	1.87393e+07
985	Q9Y2L1	Exosome complex exonuclease RRP44	DIS3	109 kDa				0	12	12		7807045	2.01989e+07
986	Q3LXA3	Triokinase/FMN cyclase	TKFC	59 kDa			✓	0	10	12		235443700	1.47906e+08
987	P49642	DNA primase small subunit	PRIM1	50 kDa				0	11	12		3.74768e+07	6.71504e+07
988	P78316	Nucleolar protein 14	NOP14	98 kDa				0	8	12		10013429	1.46857e+07
989	Q15269	Periodic tryptophan protein 2 homolog	PWP2	102 kDa				0	9	12		1.13138e+07	11054680
990	O75131	Copine-3	CPNE3	60 kDa			✓	0	8	12		1.25456e+07	37818860
991	Q8IZ83	Aldehyde dehydrogenase family 16 member A1	ALDH16A1	85 kDa				0	9	12		4.36939e+07	4.43472e+07
992	O15381	Nuclear valosin-containing protein-like	NVL	95 kDa				0	11	12		2.20804e+06	6.0625e+06
993	P31350	Ribonucleoside-diphosphate reductase subunit M2	RRM2	45 kDa				0	11	12		4809284	1.50202e+07
994	Q9NYL9	Tropomodulin-3	TMOD3	40 kDa				0	9	12		1.12955e+07	15405850
995	Q86TC9	Myopalladin	MYPN	145 kDa				0	7	12		9.29463e+06	9.28725e+06
996	Q8N3X1	Formin-binding protein 4	FNBP4	110 kDa				0	8	12		3.25023e+06	7374539
997	Q9ULW0	Targeting protein for Xklp2	TPX2	86 kDa				0	12	12		4.63286e+06	5.41062e+06
998	Q5JVF3	PCI domain-containing protein 2	PCID2	46 kDa				0	12	12		1.16314e+07	1.19423e+07
999	Q02218	2-oxoglutarate dehydrogenase, mitochondrial	OGDH	116 kDa				0	8	12		2.76122e+06	2061817
1000	Q12888	TP53-binding protein 1	TP53BP1	214 kDa				0	10	12		8964324	7.16214e+06
1001	O75197	Low-density lipoprotein receptor-related protein 5	LRP5	179 kDa		✓		0	13	12		1.44517e+06	3.55073e+06
1002	O75122	CLIP-associating protein 2	CLASP2	141 kDa				0	14	12		2.36479e+06	891806
1003	O15357	Phosphatidylinositol 3,4,5-trisphosphate 5-phosphatase 2	INPPL1	139 kDa				0	14	12		3.14566e+06	7676665
1004	Q76FK4	Nucleolar protein 8	NOL8	132 kDa				0	6	12		4.17978e+06	7858665
1005	Q15648	Mediator of RNA polymerase II transcription subunit 1	MED1	168 kDa				0	6	12		7.40234e+06	1.05015e+07
1006	Q7Z6E9	E3 ubiquitin-protein ligase RBBP6	RBBP6	202 kDa				0	7	12		9002668	13912100
1007	O94906	Pre-mRNA-processing factor 6	PRPF6	107 kDa				0	9	12		2.20659e+06	5.58969e+06
1008	Q9Y5X3	Sorting nexin-5	SNX5	47 kDa				0	11	12		720269	1462685
1009	O95453	Poly(A)-specific ribonuclease PARN	PARN	73 kDa				0	9	12		145553	706624
1010	Q9HCC0	Methylcrotonoyl-CoA carboxylase beta chain, mitochondrial	MCCC2	61 kDa				0	8	12		2724568	6097877
1011	O95747	Serine/threonine-protein kinase OSR1	OXSR1	58 kDa			✓	0	12	12		3.17295e+06	6.98579e+06
1012	P51531	Probable global transcription activator SNF2L2	SMARCA2	181 kDa				0	7	12		3.06217e+06	5.16337e+06
1013	Q15154	Pericentriolar material 1 protein	PCM1	229 kDa				0	8	12		3.95551e+06	8.31037e+06
1014	P54750	Calcium/calmodulin-dependent 3',5'-cyclic nucleotide phosphodiesterase 1A	PDE1A	61 kDa				0	8	12		510921
1015	Q86W92	Liprin-beta-1	PPFIBP1	114 kDa				0	11	12		1937927	5548451
1016	Q8ND30	Liprin-beta-2	PPFIBP2	99 kDa				0	5	12		2676288	4554268
1017	Q86SQ0	Pleckstrin homology-like domain family B member 2	PHLDB2	142 kDa				0	7	12		232922	519701
1018	O00159	Unconventional myosin-Ic	MYO1C	122 kDa			✓	0	8	12		146726	1.14237e+06
1019	Q14254	Flotillin-2	FLOT2	47 kDa			✓	0	11	12		717608	1720068
1020	P11171	Protein 4.1	EPB41	97 kDa				0	10	12			7.53515e+07
1021	Q15172	Serine/threonine-protein phosphatase 2A 56 kDa regulatory subunit alpha isoform	PPP2R5A	56 kDa				0	12	12			8.27092e+06
1022	O75044	SLIT-ROBO Rho GTPase-activating protein 2	SRGAP2	121 kDa				0	12	12			15008050
1023	Q5T5Y3	Calmodulin-regulated spectrin-associated protein 1	CAMSAP1	178 kDa				0	0	12			6.21954e+06
1024	P29317	Ephrin type-A receptor 2	EPHA2	108 kDa		✓		0	0	12			4.59248e+06
1025	Q9H9G7	Protein argonaute-3	AGO3	97 kDa				0	0	12			1.31464e+06
1026	Q2M2I8	AP2-associated protein kinase 1	AAK1	104 kDa				0	0	12			1.02699e+06
1027	Q86X55	Histone-arginine methyltransferase CARM1	CARM1	66 kDa				16	11	11	6.54162e+07	1.2611e+08	188397400
1028	P38919	Eukaryotic initiation factor 4A-III	EIF4A3	47 kDa				16	12	11	8.197e+07	9.29731e+07	4.51555e+07
1029	Q8WVM8	Sec1 family domain-containing protein 1	SCFD1	72 kDa				16	11	11	1.16382e+08	3.08966e+08	3.65906e+08
1030	O14818	Proteasome subunit alpha type-7	PSMA7	28 kDa			✓	14	8	11	8.36536e+07	3.39972e+08	277488300
1031	P68104	Elongation factor 1-alpha 1	EEF1A1	50 kDa			✓	14	11	11	4.15782e+08	1.19634e+08	190268800
1032	P08253	72 kDa type IV collagenase	MMP2	74 kDa		✓		12	11	11	2.82703e+07	109809600	7.80125e+07
1033	P22681	E3 ubiquitin-protein ligase CBL	CBL	100 kDa				12	11	11	1.64255e+07	8.39708e+07	2.01446e+08
1034	P06733	Alpha-enolase	ENO1	47 kDa			✓	11	12	11	3.02233e+06	3958173	2.783e+06
1035	P13591	Neural cell adhesion molecule 1	NCAM1	95 kDa		✓		11	11	11	9.44564e+07	9.53349e+07	6.97666e+07
1036	P49407	Beta-arrestin-1	ARRB1	47 kDa	✓			11	11	11	4.82334e+07	3.88928e+08	5.74882e+08
1037	O75718	Cartilage-associated protein	CRTAP	47 kDa		✓		11	13	11	2.25599e+07	3.41943e+07	3.10016e+07
1038	P12081	Histidine--tRNA ligase, cytoplasmic	HARS1	57 kDa				11	11	11	1.5571e+06	3156556	2630623
1039	Q9BRK5	45 kDa calcium-binding protein	SDF4	42 kDa		✓	✓	10	12	11	5.12584e+06	17557710	4.39769e+07
1040	P48059	LIM and senescent cell antigen-like-containing domain protein 1	LIMS1	37 kDa	✓			10	10	11	4.24721e+06	1.49866e+07	2.42647e+07
1041	O95084	Serine protease 23	PRSS23	43 kDa		✓	✓	10	11	11	2.24041e+06	22186760	1.06619e+08
1042	P63244	Receptor of activated protein C kinase 1	RACK1	35 kDa			✓	10	11	11	2.25133e+06	9012190	2404970
1043	Q8IXL6	Extracellular serine/threonine protein kinase FAM20C	FAM20C	66 kDa	✓	✓	✓	10	11	11	5.61875e+06	3805857	4503959
1044	Q92743	Serine protease HTRA1	HTRA1	51 kDa	✓	✓	✓	10	11	11	1705488	1.09434e+07	11930400
1045	Q01085	Nucleolysin TIAR	TIAL1	42 kDa				10	10	11	3.87017e+07	5.83257e+07	2.36914e+07
1046	P49841	Glycogen synthase kinase-3 beta	GSK3B	47 kDa				10	9	11	10060558	19002490	2.46621e+08
1047	P50454	Serpin H1	SERPINH1	46 kDa		✓		9	12	11	8.369e+06	169185800	3.30306e+08
1048	P20936	Ras GTPase-activating protein 1	RASA1	116 kDa				9	11	11	358745	17583560	2.86422e+07
1049	P08758	Annexin A5	ANXA5	36 kDa			✓	9	10	11	3.24753e+06	4.22572e+06	1.28781e+07
1050	Q12805	EGF-containing fibulin-like extracellular matrix protein 1	EFEMP1	55 kDa		✓	✓	9	10	11	1.53143e+07	1.19895e+08	2.60251e+08
1051	P20618	Proteasome subunit beta type-1	PSMB1	26 kDa			✓	8	10	11	1.18386e+07	32484130	47419090
1052	P04083	Annexin A1	ANXA1	39 kDa	✓		✓	8	11	11	2764391	19585440	3.15423e+07
1053	Q6IBS0	Twinfilin-2	TWF2	40 kDa			✓	8	11	11	2.0166e+07	37814310	3.1837e+07
1054	Q15084	Protein disulfide-isomerase A6	PDIA6	48 kDa		✓	✓	8	10	11	662883	8.1825e+06	15017400
1055	Q9P258	Protein RCC2	RCC2	56 kDa				8	11	11	393585	2.02832e+06	2.08768e+06
1056	Q8IYD1	Eukaryotic peptide chain release factor GTP-binding subunit ERF3B	GSPT2	69 kDa				8	10	11	1.18634e+06	1.94094e+07	30055090
1057	Q9UHX1	Poly(U)-binding-splicing factor PUF60	PUF60	60 kDa				8	10	11	3909017	2.19847e+07	4.23174e+07
1058	P07195	L-lactate dehydrogenase B chain	LDHB	37 kDa			✓	8	10	11	378157	6.54903e+06	8853532
1059	Q86SR1	Polypeptide N-acetylgalactosaminyltransferase 10	GALNT10	69 kDa				8	11	11	7.72617e+06	1531529	2063415
1060	O75976	Carboxypeptidase D	CPD	153 kDa		✓	✓	7	11	11	494676	1.02007e+07	11142600
1061	Q9UMS4	Pre-mRNA-processing factor 19	PRPF19	55 kDa	✓			7	9	11	5205506	5.68589e+07	1.05641e+08
1062	P80723	Brain acid soluble protein 1	BASP1	23 kDa			✓	7	11	11	1.49814e+06	1580966	2.48677e+06
1063	P08779	Keratin, type I cytoskeletal 16	KRT16	51 kDa	✓		✓	7	10	11	2346650	5673477	4.03733e+06
1064	P16152	Carbonyl reductase [NADPH] 1	CBR1	30 kDa			✓	7	9	11	105944	691548	634589
1065	Q92599	Septin-8	SEPTIN8	56 kDa				7	9	11	558460	2.18607e+07	43591120
1066	Q9ULF5	Zinc transporter ZIP10	SLC39A10	94 kDa		✓		6	9	11	1378054	2.22685e+07	37443020
1067	Q969P0	Immunoglobulin superfamily member 8	IGSF8	65 kDa	✓	✓	✓	6	10	11	109513	1.0555e+07	1.69108e+07
1068	P37235	Hippocalcin-like protein 1	HPCAL1	22 kDa	✓			6	10	11	364068	9.9812e+06	21312410
1069	Q99536	Synaptic vesicle membrane protein VAT-1 homolog	VAT1	42 kDa			✓	6	8	11	525141	9.30444e+06	1.75275e+07
1070	O95428	Papilin	PAPLN	138 kDa		✓		6	12	11	573539	1.04884e+07	1.78428e+07
1071	Q86UE4	Protein LYRIC	MTDH	64 kDa				6	11	11	676194	1.27939e+07	28679220
1072	P41091	Eukaryotic translation initiation factor 2 subunit 3	EIF2S3	51 kDa	✓		✓	6	11	11	1333330	1.46247e+07	2.90699e+07
1073	Q86YQ8	Copine-8	CPNE8	63 kDa			✓	6	10	11	352839	7.2483e+06	1.48456e+07
1074	Q9UNQ0	Broad substrate specificity ATP-binding cassette transporter ABCG2	ABCG2	72 kDa				5	7	11	9.16957e+06	6817332	5.62882e+06
1075	Q9Y315	Deoxyribose-phosphate aldolase	DERA	35 kDa				5	9	11	2783022	3.85562e+07	5.40094e+07
1076	P23588	Eukaryotic translation initiation factor 4B	EIF4B	69 kDa				4	6	11	959572	8.90147e+06	9791782
1077	O95816	BAG family molecular chaperone regulator 2	BAG2	24 kDa				4	10	11	925163	1.50853e+07	31592680
1078	Q9Y617	Phosphoserine aminotransferase	PSAT1	40 kDa			✓	4	11	11	163310	11364660	18285720
1079	Q9NVX2	Notchless protein homolog 1	NLE1	53 kDa				4	8	11	Missing Value	5270497	8.21077e+06
1080	P48637	Glutathione synthetase	GSS	52 kDa			✓	4	10	11	119361	4.06731e+06	1.23856e+07
1081	Q96RS6	NudC domain-containing protein 1	NUDCD1	67 kDa				4	11	11	2.19299e+07	Missing Value	2766096
1082	Q99447	Ethanolamine-phosphate cytidylyltransferase	PCYT2	44 kDa				4	11	11	63552.9	3967233	6486187
1083	P19784	Casein kinase II subunit alpha'	CSNK2A2	41 kDa				4	7	11	2.84203e+06	1.14044e+07	6.15129e+07
1084	B0I1T2	Unconventional myosin-Ig	MYO1G	116 kDa			✓	4	6	11		1.81278e+07	3.19601e+07
1085	Q13895	Bystin	BYSL	50 kDa				3	11	11		4.58065e+08	7.32789e+08
1086	Q9BXS6	Nucleolar and spindle-associated protein 1	NUSAP1	49 kDa				3	12	11		3.64315e+07	51275360
1087	P13804	Electron transfer flavoprotein subunit alpha, mitochondrial	ETFA	35 kDa	✓			3	11	11		9.24367e+06	12273130
1088	Q9ULA0	Aspartyl aminopeptidase	DNPEP	52 kDa	✓			3	9	11		6.41851e+06	1.26987e+07
1089	Q16831	Uridine phosphorylase 1	UPP1	34 kDa				3	8	11		1.30147e+08	2.56908e+08
1090	Q14978	Nucleolar and coiled-body phosphoprotein 1	NOLC1	74 kDa				2	9	11		4.47513e+07	78053420
1091	Q15654	Thyroid receptor-interacting protein 6	TRIP6	50 kDa				2	7	11		2927245	4.27504e+06
1092	P09543	2',3'-cyclic-nucleotide 3'-phosphodiesterase	CNP	48 kDa			✓	2	9	11		8.01766e+06	1.70602e+07
1093	Q14192	Four and a half LIM domains protein 2	FHL2	32 kDa				2	8	11		1.13185e+08	180205700
1094	Q9BWU0	Kanadaptin	SLC4A1AP	89 kDa				2	10	11		3144783	7.32631e+06
1095	Q9NPQ8	Synembryn-A	RIC8A	60 kDa				2	8	11		1.01955e+07	1.37549e+07
1096	P49643	DNA primase large subunit	PRIM2	59 kDa				1	11	11		6.46282e+06	1.34272e+07
1097	Q9NUQ3	Gamma-taxilin	TXLNG	61 kDa				1	9	11		1.16975e+06	4.42542e+06
1098	Q8WYA6	Beta-catenin-like protein 1	CTNNBL1	65 kDa				1	11	11		9.11751e+06	1.57715e+07
1099	Q9P2N5	RNA-binding protein 27	RBM27	119 kDa				1	7	11		3240303	7.13638e+06
1100	O00499	Myc box-dependent-interacting protein 1	BIN1	65 kDa				0	6	11		9.777e+08	1.96432e+08
1101	P40926	Malate dehydrogenase, mitochondrial	MDH2	36 kDa			✓	0	10	11		1.71516e+07	29180120
1102	Q86YP4	Transcriptional repressor p66-alpha	GATAD2A	68 kDa				0	10	11		848962	1.5351e+06
1103	Q6IA86	Elongator complex protein 2	ELP2	92 kDa				0	10	11		8.50238e+06	1.80945e+07
1104	O75822	Eukaryotic translation initiation factor 3 subunit J	EIF3J	29 kDa				0	11	11		1.00063e+07	2.11299e+07
1105	Q9UBU9	Nuclear RNA export factor 1	NXF1	70 kDa				0	10	11		3019579	6423262
1106	P09913	Interferon-induced protein with tetratricopeptide repeats 2	IFIT2	55 kDa				0	10	11		3182665	4769920
1107	Q9Y613	FH1/FH2 domain-containing protein 1	FHOD1	127 kDa				0	10	11		4.75279e+06	7.77813e+06
1108	Q9UNS2	COP9 signalosome complex subunit 3	COPS3	48 kDa				0	10	11		15404520	3.75958e+07
1109	Q96KQ7	Histone-lysine N-methyltransferase EHMT2	EHMT2	132 kDa				0	8	11		3.96848e+06	4.87034e+07
1110	O75530	Polycomb protein EED	EED	50 kDa				0	9	11		1.75205e+06	1.65728e+06
1111	Q96D46	60S ribosomal export protein NMD3	NMD3	58 kDa				0	9	11		1.05629e+07	18434380
1112	Q9P275	Ubiquitin carboxyl-terminal hydrolase 36	USP36	123 kDa				0	9	11		6.76908e+06	1.02806e+07
1113	Q5T1M5	FK506-binding protein 15	FKBP15	134 kDa				0	9	11		1.7777e+07	2.87872e+07
1114	O43491	Band 4.1-like protein 2	EPB41L2	113 kDa			✓	0	7	11		1.75172e+06	5.03746e+06
1115	Q13573	SNW domain-containing protein 1	SNW1	61 kDa				0	9	11		3519080	5.23044e+06
1116	P06132	Uroporphyrinogen decarboxylase	UROD	41 kDa				0	7	11		3909960	7.16584e+06
1117	O60547	GDP-mannose 4,6 dehydratase	GMDS	42 kDa			✓	0	10	11		6.54485e+06	13783000
1118	P17480	Nucleolar transcription factor 1	UBTF	89 kDa				0	11	11		2.41526e+06	4.59205e+06
1119	P24941	Cyclin-dependent kinase 2	CDK2	34 kDa				0	9	11		8.90776e+06	1.35576e+07
1120	Q9NTI5	Sister chromatid cohesion protein PDS5 homolog B	PDS5B	165 kDa				0	8	11		1.03936e+06	5351764
1121	O95487	Protein transport protein Sec24B	SEC24B	137 kDa				0	8	11		1.31757e+06	7.15145e+06
1122	Q99700	Ataxin-2	ATXN2	140 kDa				0	7	11		1.39662e+07	12907270
1123	P22033	Methylmalonyl-CoA mutase, mitochondrial	MMUT	83 kDa				0	9	11		11725907	24334720
1124	Q9BW27	Nuclear pore complex protein Nup85	NUP85	75 kDa				0	8	11		1.04497e+07	7.99462e+06
1125	P32929	Cystathionine gamma-lyase	CTH	45 kDa			✓	0	8	11		3.24347e+06	4.11826e+06
1126	O00291	Huntingtin-interacting protein 1	HIP1	116 kDa				0	6	11		4274823	8.10135e+06
1127	Q92636	Protein FAN	NSMAF	104 kDa				0	6	11		6.00683e+06	5595406
1128	Q16822	Phosphoenolpyruvate carboxykinase [GTP], mitochondrial	PCK2	71 kDa				0	12	11		1.52796e+06	3.06491e+06
1129	Q6ZS17	Rho family-interacting cell polarization regulator 1	RIPOR1	132 kDa			✓	0	12	11		3.7146e+06	8301319
1130	Q12872	Splicing factor, suppressor of white-apricot homolog	SFSWAP	105 kDa				0	7	11		3782912	9292132
1131	Q9GZR7	ATP-dependent RNA helicase DDX24	DDX24	96 kDa				0	11	11		5.43035e+06	11035730
1132	P46100	Transcriptional regulator ATRX	ATRX	283 kDa				0	7	11		1.6582e+06	2290311
1133	Q9Y263	Phospholipase A-2-activating protein	PLAA	87 kDa			✓	0	11	11		2.06057e+06	5.13277e+06
1134	O75439	Mitochondrial-processing peptidase subunit beta	PMPCB	54 kDa				0	10	11		5632511	9256838
1135	Q9H2P0	Activity-dependent neuroprotector homeobox protein	ADNP	124 kDa				0	6	11		1.6425e+06	7.3694e+06
1136	O95239	Chromosome-associated kinesin KIF4A	KIF4A	140 kDa				0	6	11		3.31081e+06	6.55164e+06
1137	Q5UIP0	Telomere-associated protein RIF1	RIF1	274 kDa				0	5	11		1293503	1.97549e+06
1138	P38606	V-type proton ATPase catalytic subunit A	ATP6V1A	68 kDa			✓	0	11	11		6018193	9.6151e+06
1139	Q9NZM3	Intersectin-2	ITSN2	193 kDa			✓	0	9	11		2.75661e+06	6218170
1140	P11172	Uridine 5'-monophosphate synthase	UMPS	52 kDa				0	8	11		2.87642e+06	6.65885e+06
1141	Q9NVU7	Protein SDA1 homolog	SDAD1	80 kDa				0	8	11		1952345	4.02274e+06
1142	Q86W56	Poly(ADP-ribose) glycohydrolase	PARG	111 kDa		✓		0	6	11		3.58178e+06	7734993
1143	Q6P1N9	Putative deoxyribonuclease TATDN1	TATDN1	34 kDa				0	11	11		797053	2513788
1144	O43264	Centromere/kinetochore protein zw10 homolog	ZW10	89 kDa				0	7	11		3.14392e+06	4.9699e+06
1145	Q8TDD1	ATP-dependent RNA helicase DDX54	DDX54	99 kDa				0	5	11		2.04918e+06	4.62027e+06
1146	Q8NBF2	NHL repeat-containing protein 2	NHLRC2	79 kDa				0	10	11		2.8342e+06	5.90216e+06
1147	Q8TF05	Serine/threonine-protein phosphatase 4 regulatory subunit 1	PPP4R1	107 kDa				0	11	11		2.55478e+06	6147237
1148	Q86Y56	Dynein assembly factor 5, axonemal	DNAAF5	94 kDa				0	5	11		4329145	5.29919e+06
1149	Q9H501	ESF1 homolog	ESF1	99 kDa				0	7	11		2.55731e+06	5.27616e+06
1150	Q13126	S-methyl-5'-thioadenosine phosphorylase	MTAP	31 kDa			✓	0	11	11		3259089	7.1578e+06
1151	P30260	Cell division cycle protein 27 homolog	CDC27	92 kDa				0	8	11		81920.4	127291
1152	Q9UJX3	Anaphase-promoting complex subunit 7	ANAPC7	67 kDa				0	7	11		1.95728e+06	1.11446e+07
1153	Q9Y223	Bifunctional UDP-N-acetylglucosamine 2-epimerase/N-acetylmannosamine kinase	GNE	79 kDa				0	12	11		1.80609e+06	3.69941e+06
1154	Q16401	26S proteasome non-ATPase regulatory subunit 5	PSMD5	56 kDa				0	10	11		785856	1.97832e+06
1155	P49454	Centromere protein F	CENPF	358 kDa				0	10	11		6449948	8.89405e+06
1156	P06756	Integrin alpha-V	ITGAV	116 kDa		✓	✓	0	12	11		3.14393e+06	1.00495e+07
1157	Q7L5Y1	Mitochondrial enolase superfamily member 1	ENOSF1	50 kDa				0	10	11		2251412	5886946
1158	Q7Z6M1	Rab9 effector protein with kelch motifs	RABEPK	41 kDa				0	7	11		621098	1.67828e+06
1159	Q9NS87	Kinesin-like protein KIF15	KIF15	160 kDa				0	6	11		1.3241e+06	3.13956e+06
1160	Q9H4A4	Aminopeptidase B	RNPEP	73 kDa			✓	0	9	11		1.08091e+06	3.34271e+06
1161	Q86X10	Ral GTPase-activating protein subunit beta	RALGAPB	167 kDa				0	5	11		947461	3129079
1162	P09622	Dihydrolipoyl dehydrogenase, mitochondrial	DLD	54 kDa				0	8	11		1.19172e+06	3.14226e+06
1163	Q13439	Golgin subfamily A member 4	GOLGA4	261 kDa			✓	0	5	11		966555	2254459
1164	O60488	Long-chain-fatty-acid--CoA ligase 4	ACSL4	79 kDa			✓	0	9	11		Missing Value	431584
1165	P00367	Glutamate dehydrogenase 1, mitochondrial	GLUD1	61 kDa				0	11	11			2.82209e+06
1166	A3KN83	Protein strawberry notch homolog 1	SBNO1	154 kDa				0	20	11			6.0464e+06
1167	P46934	E3 ubiquitin-protein ligase NEDD4	NEDD4	149 kDa			✓	0	0	11			976723
1168	Q5T447	E3 ubiquitin-protein ligase HECTD3	HECTD3	97 kDa				0	0	11			945760
1169	Q86YS7	C2 domain-containing protein 5	C2CD5	110 kDa				0	2	11			3963470
1170	Q13315	Serine-protein kinase ATM	ATM	351 kDa				0	0	11			1.15005e+06
1171	Q8IY18	Structural maintenance of chromosomes protein 5	SMC5	129 kDa				0	0	11			4.05647e+06
1172	P09972	Fructose-bisphosphate aldolase C	ALDOC	39 kDa			✓	0	0	11			1.02987e+06
1173	Q96Q15	Serine/threonine-protein kinase SMG1	SMG1	410 kDa				0	0	11			1.1396e+06
1174	Q96L92	Sorting nexin-27	SNX27	61 kDa				0	0	11			1.07006e+06
1175	Q6ZNJ1	Neurobeachin-like protein 2	NBEAL2	303 kDa				17	15	10	1.10837e+07	20225000	17648960
1176	Q15717	ELAV-like protein 1	ELAVL1	36 kDa				14	9	10	1.21733e+08	228572800	2.94595e+08
1177	P12109	Collagen alpha-1(VI) chain	COL6A1	109 kDa	✓	✓	✓	12	12	10	1.89808e+07	6.77466e+07	1.20796e+08
1178	P08240	Signal recognition particle receptor subunit alpha	SRPRA	70 kDa			✓	12	10	10	4.10041e+06	1.17018e+07	2.43151e+07
1179	Q9UBT2	SUMO-activating enzyme subunit 2	UBA2	71 kDa				12	16	10	64822210	3.67971e+08	5.53047e+08
1180	P07858	Cathepsin B	CTSB	38 kDa		✓	✓	10	10	10	38241330	8.09894e+07	8.4271e+07
1181	P51665	26S proteasome non-ATPase regulatory subunit 7	PSMD7	37 kDa			✓	10	10	10	2.05342e+06	10312428	4.41837e+07
1182	P55287	Cadherin-11	CDH11	88 kDa		✓	✓	10	10	10	1.66303e+07	4.83643e+07	4.13005e+07
1183	P60900	Proteasome subunit alpha type-6	PSMA6	27 kDa			✓	10	10	10	9.38643e+06	77290440	1.33667e+08
1184	Q13421	Mesothelin	MSLN	69 kDa		✓		10	11	10	1.10693e+08	124072300	105672740
1185	Q9Y696	Chloride intracellular channel protein 4	CLIC4	29 kDa	✓		✓	10	10	10	7.02463e+06	12156740	15191630
1186	O75339	Cartilage intermediate layer protein 1	CILP	133 kDa	✓	✓	✓	10	10	10	2.3596e+08	559612800	8.60958e+08
1187	P23528	Cofilin-1	CFL1	19 kDa			✓	10	10	10	13408410	64316860	1.26293e+08
1188	Q9NYQ8	Protocadherin Fat 2	FAT2	479 kDa		✓	✓	10	10	10	1.11311e+07	9.22893e+07	1.50348e+08
1189	P62424	60S ribosomal protein L7a	RPL7A	30 kDa				10	14	10	33869240	5.38614e+07	2.95372e+07
1190	Q9H6X2	Anthrax toxin receptor 1	ANTXR1	63 kDa	✓	✓		9	8	10	3.38243e+06	2115107	1.67314e+06
1191	P06865	Beta-hexosaminidase subunit alpha	HEXA	61 kDa	✓	✓	✓	9	10	10	1820943	2.42861e+07	2.91599e+07
1192	P04075	Fructose-bisphosphate aldolase A	ALDOA	39 kDa			✓	9	9	10	7964439
1193	O00584	Ribonuclease T2	RNASET2	29 kDa		✓	✓	9	10	10	4.49038e+07	3.83677e+07	2.77541e+07
1194	Q9UL46	Proteasome activator complex subunit 2	PSME2	27 kDa			✓	9	9	10	1.3811e+06	2.17672e+07	3.14658e+07
1195	Q02153	Guanylate cyclase soluble subunit beta-1	GUCY1B1	71 kDa				9	10	10	2.60195e+07	107548400	1.50848e+08
1196	P27797	Calreticulin	CALR	48 kDa		✓	✓	9	9	10	1.70202e+06	45145280	6.59704e+07
1197	P49189	4-trimethylaminobutyraldehyde dehydrogenase	ALDH9A1	54 kDa			✓	9	9	10	2152445	1.17153e+07	1.83411e+07
1198	P04275	von Willebrand factor	VWF	309 kDa		✓	✓	9	9	10	3.33056e+06	85637940	119223100
1199	P00492	Hypoxanthine-guanine phosphoribosyltransferase	HPRT1	25 kDa			✓	9	9	10	2578082	3.71658e+07	60750100
1200	Q9HB71	Calcyclin-binding protein	CACYBP	26 kDa	✓		✓	8	10	10	4.95731e+06	1.29624e+08	1.54775e+08
1201	P31947	14-3-3 protein sigma	SFN	28 kDa	✓		✓	8	10	10	2.30054e+06	1.7829e+07	3.01847e+07
1202	P00750	Tissue-type plasminogen activator	PLAT	63 kDa		✓	✓	8	8	10	2.93048e+06	1.61374e+07	4.48055e+07
1203	O43765	Small glutamine-rich tetratricopeptide repeat-containing protein alpha	SGTA	34 kDa				8	10	10	917883	1.12891e+06	2.53487e+06
1204	P13798	Acylamino-acid-releasing enzyme	APEH	81 kDa	✓		✓	8	9	10	116859	2.02495e+07	2.59407e+07
1205	Q9ULV4	Coronin-1C	CORO1C	53 kDa				8	9	10	4032453	17664910	2.29817e+07
1206	P07339	Cathepsin D	CTSD	45 kDa		✓	✓	8	9	10	14662980	10577922	4992835
1207	Q9Y570	Protein phosphatase methylesterase 1	PPME1	42 kDa				8	10	10	2.00213e+06	1.50575e+07	25940950
1208	P04899	Guanine nucleotide-binding protein G(i) subunit alpha-2	GNAI2	40 kDa			✓	8	10	10	1.61938e+07	6.2417e+07	5.30241e+07
1209	P05783	Keratin, type I cytoskeletal 18	KRT18	48 kDa			✓	8	9	10	1571939	19878540	4.07337e+07
1210	P46926	Glucosamine-6-phosphate isomerase 1	GNPDA1	33 kDa			✓	8	10	10	884479	8.08935e+06	1.17887e+07
1211	P47755	F-actin-capping protein subunit alpha-2	CAPZA2	33 kDa	✓		✓	8	8	10	153045	51406390	9.11726e+07
1212	Q9NYF8	Bcl-2-associated transcription factor 1	BCLAF1	106 kDa				8	8	10	1.28963e+06	5840958	9155639
1213	O43865	S-adenosylhomocysteine hydrolase-like protein 1	AHCYL1	59 kDa			✓	8	8	10	3.01372e+07	2.29155e+07	3.14107e+07
1214	Q15019	Septin-2	SEPTIN2	41 kDa			✓	7	8	10	143914	7.34905e+06	1.5202e+07
1215	Q09028	Histone-binding protein RBBP4	RBBP4	48 kDa				7	9	10	579026	1.27704e+06	4.40059e+06
1216	P46777	60S ribosomal protein L5	RPL5	34 kDa			✓	7	10	10	8981896	1.49754e+07	1.75775e+07
1217	Q6FI81	Anamorsin	CIAPIN1	34 kDa				7	11	10	1.22364e+06	2.15035e+07	3.04606e+07
1218	Q15435	Protein phosphatase 1 regulatory subunit 7	PPP1R7	42 kDa	✓		✓	7	10	10	160109	2.67651e+06	2.41876e+06
1219	Q9UN86	Ras GTPase-activating protein-binding protein 2	G3BP2	54 kDa				6	10	10	302744	4.88645e+06	1.01501e+07
1220	O14745	Na(+)/H(+) exchange regulatory cofactor NHE-RF1	SLC9A3R1	39 kDa			✓	6	10	10	5405808	61914840	8.72837e+07
1221	P30154	Serine/threonine-protein phosphatase 2A 65 kDa regulatory subunit A beta isoform	PPP2R1B	66 kDa			✓	6	9	10	366093	2.0061e+07	4.82781e+07
1222	Q01581	Hydroxymethylglutaryl-CoA synthase, cytoplasmic	HMGCS1	57 kDa				6	11	10	3225185	39793640	1.02606e+08
1223	Q15942	Zyxin	ZYX	61 kDa				6	9	10	361452	7.48581e+06	17210950
1224	O96019	Actin-like protein 6A	ACTL6A	47 kDa				6	10	10	182941	6.58471e+06	11220920
1225	Q9UKD2	mRNA turnover protein 4 homolog	MRTO4	28 kDa				6	10	10	376431	9.65803e+06	15908780
1226	P50552	Vasodilator-stimulated phosphoprotein	VASP	40 kDa			✓	6	10	10	1.81195e+06	2.31738e+07	3.61337e+07
1227	Q06830	Peroxiredoxin-1	PRDX1	22 kDa			✓	6	8	10	1.38185e+06	1.15582e+07	19113150
1228	Q8WX92	Negative elongation factor B	NELFB	66 kDa				6	10	10	1.55485e+06	14998670	3.24652e+07
1229	O75410	Transforming acidic coiled-coil-containing protein 1	TACC1	88 kDa				6	7	10	178713	6865338	12400080
1230	Q96AG4	Leucine-rich repeat-containing protein 59	LRRC59	35 kDa				5	9	10	994047	1.11788e+07	1.89455e+07
1231	P30520	Adenylosuccinate synthetase isozyme 2	ADSS2	50 kDa			✓	5	10	10	1.71308e+06	4.05928e+07	96212130
1232	P13716	Delta-aminolevulinic acid dehydratase	ALAD	36 kDa			✓	5	8	10	1.57179e+06	14612330	18020650
1233	Q07960	Rho GTPase-activating protein 1	ARHGAP1	50 kDa			✓	5	9	10	3.85074e+07	2.19725e+07	2.05394e+07
1234	O00170	AH receptor-interacting protein	AIP	38 kDa				5	8	10	1.71451e+07	2.63281e+07	41287900
1235	P12277	Creatine kinase B-type	CKB	43 kDa			✓	5	9	10	834709	9986223	1.60176e+07
1236	O75312	Zinc finger protein ZPR1	ZPR1	51 kDa				5	10	10	1741236	16886540	22166100
1237	Q15637	Splicing factor 1	SF1	68 kDa				4	10	10	2450348	2.36229e+07	3.80027e+07
1238	P55039	Developmentally-regulated GTP-binding protein 2	DRG2	41 kDa				4	9	10	4769594	95174550	2.49229e+08
1239	O75390	Citrate synthase, mitochondrial	CS	52 kDa	✓		✓	4	8	10	373917	4.63665e+06	10688010
1240	O43815	Striatin	STRN	86 kDa				4	10	10	106864	6.32527e+06	8640166
1241	Q9Y285	Phenylalanine--tRNA ligase alpha subunit	FARSA	58 kDa				4	10	10	3.48191e+06	10855446	30956630
1242	Q9H814	Phosphorylated adapter RNA export protein	PHAX	44 kDa				4	10	10	297381	7.91088e+06	1.88466e+07
1243	Q9GZL7	Ribosome biogenesis protein WDR12	WDR12	48 kDa				4	9	10	841289	1.39516e+07	22614890
1244	O94991	SLIT and NTRK-like protein 5	SLITRK5	107 kDa		✓		4	9	10	112400	2042195	3.28619e+06
1245	Q9H1Y0	Autophagy protein 5	ATG5	32 kDa				4	9	10	Missing Value	Missing Value	Missing Value
1246	Q9H7D7	WD repeat-containing protein 26	WDR26	72 kDa				4	6	10		1.89701e+07	2.73096e+07
1247	P23258	Tubulin gamma-1 chain	TUBG1	51 kDa				4	8	10		5622974	1.36603e+07
1248	Q7Z3T8	Zinc finger FYVE domain-containing protein 16	ZFYVE16	169 kDa				4	8	10		11512290	1.36344e+07
1249	Q7Z4Q2	HEAT repeat-containing protein 3	HEATR3	75 kDa				4	9	10		15301300	23349450
1250	P49757	Protein numb homolog	NUMB	71 kDa				4	5	10		706371	649386
1251	Q12959	Disks large homolog 1	DLG1	100 kDa			✓	4	12	10		12263830	18789500
1252	Q96QU8	Exportin-6	XPO6	129 kDa				4	12	10		5284799	9.34772e+06
1253	Q08257	Quinone oxidoreductase	CRYZ	35 kDa			✓	3	7	10		13074440	1.57721e+07
1254	P78318	Immunoglobulin-binding protein 1	IGBP1	39 kDa				3	6	10		1.54851e+07	3.41699e+07
1255	P80217	Interferon-induced 35 kDa protein	IFI35	32 kDa				3	10	10		1.32648e+07	36589760
1256	Q14344	Guanine nucleotide-binding protein subunit alpha-13	GNA13	44 kDa			✓	3	7	10		6290468	16380290
1257	Q15018	BRISC complex subunit Abraxas 2	ABRAXAS2	47 kDa				3	9	10		7574547	9.04807e+06
1258	Q9H9A5	CCR4-NOT transcription complex subunit 10	CNOT10	82 kDa				3	10	10		8513022	14220230
1259	P49366	Deoxyhypusine synthase	DHPS	41 kDa	✓			2	8	10		10700170	17294350
1260	Q8IYB3	Serine/arginine repetitive matrix protein 1	SRRM1	102 kDa	✓			2	8	10		506710	1.75874e+06
1261	P09914	Interferon-induced protein with tetratricopeptide repeats 1	IFIT1	55 kDa	✓			2	9	10		3.43288e+07	45234530
1262	Q16698	2,4-dienoyl-CoA reductase, mitochondrial	DECR1	36 kDa				2	9	10		2776982	1.12827e+07
1263	Q9NY27	Serine/threonine-protein phosphatase 4 regulatory subunit 2	PPP4R2	47 kDa				2	7	10		4.69303e+06	1.5949e+07
1264	Q6L8Q7	2',5'-phosphodiesterase 12	PDE12	67 kDa				2	8	10		1288777	4.94016e+06
1265	Q9UBB6	Neurochondrin	NCDN	79 kDa				2	8	10		8610591	1.03086e+07
1266	Q9H7Z7	Prostaglandin E synthase 2	PTGES2	42 kDa				1	9	10		1.21875e+07	36678370
1267	Q96EE3	Nucleoporin SEH1	SEH1L	40 kDa				1	6	10		9673598	1.24946e+07
1268	Q96SY0	Integrator complex subunit 14	INTS14	57 kDa				1	8	10		21646420	43166200
1269	Q9BZE4	Nucleolar GTP-binding protein 1	GTPBP4	74 kDa				0	6	10		2151967	7.74628e+06
1270	P35269	General transcription factor IIF subunit 1	GTF2F1	58 kDa				0	8	10		9.06946e+06	10358831
1271	P35270	Sepiapterin reductase	SPR	28 kDa			✓	0	10	10		1.0176e+07	1.18096e+07
1272	Q6DKJ4	Nucleoredoxin	NXN	48 kDa				0	8	10		8.43416e+06	1.574e+07
1273	Q9Y5J1	U3 small nucleolar RNA-associated protein 18 homolog	UTP18	62 kDa				0	9	10		7118562	18475980
1274	Q10713	Mitochondrial-processing peptidase subunit alpha	PMPCA	58 kDa				0	9	10		6559549	8.7824e+06
1275	Q12972	Nuclear inhibitor of protein phosphatase 1	PPP1R8	38 kDa				0	10	10		1.57395e+07	3.2393e+07
1276	Q9UJA5	tRNA (adenine(58)-N(1))-methyltransferase non-catalytic subunit TRM6	TRMT6	56 kDa				0	8	10		5.13731e+06	10452580
1277	Q9UNQ2	Probable dimethyladenosine transferase	DIMT1	35 kDa				0	9	10		6.28488e+06	1.45705e+07
1278	Q99714	3-hydroxyacyl-CoA dehydrogenase type-2	HSD17B10	27 kDa				0	10	10		5.11108e+06	1.1966e+07
1279	Q8N3D4	EH domain-binding protein 1-like protein 1	EHBP1L1	162 kDa				0	8	10		6.3831e+06	1.65011e+07
1280	Q00653	Nuclear factor NF-kappa-B p100 subunit	NFKB2	97 kDa				0	4	10		2106267	3456623
1281	Q8TED0	U3 small nucleolar RNA-associated protein 15 homolog	UTP15	58 kDa				0	11	10		4.5948e+06	9.14206e+06
1282	Q5M775	Cytospin-B	SPECC1	119 kDa				0	9	10		6786231	7.10306e+06
1283	O75934	Pre-mRNA-splicing factor SPF27	BCAS2	26 kDa				0	8	10		2.38029e+06	3.33075e+06
1284	Q8TBB5	Kelch domain-containing protein 4	KLHDC4	58 kDa				0	8	10		5.14808e+06	7.49916e+06
1285	Q3YEC7	Rab-like protein 6	RABL6	80 kDa				0	9	10		1.63928e+06	3.2087e+06
1286	Q8NB16	Mixed lineage kinase domain-like protein	MLKL	54 kDa				0	10	10		1.99345e+07	20269800
1287	Q66K74	Microtubule-associated protein 1S	MAP1S	112 kDa				0	10	10		6.19489e+06	9.49938e+06
1288	Q92466	DNA damage-binding protein 2	DDB2	48 kDa				0	9	10		5.63362e+06	4.25771e+06
1289	Q9NNW7	Thioredoxin reductase 2, mitochondrial	TXNRD2	57 kDa				0	5	10		4.6221e+06	5077393
1290	Q8IWX8	Calcium homeostasis endoplasmic reticulum protein	CHERP	104 kDa				0	7	10		5.1943e+06	1.18633e+07
1291	Q9Y608	Leucine-rich repeat flightless-interacting protein 2	LRRFIP2	82 kDa				0	7	10		2846289	8.91033e+06
1292	Q96I15	Selenocysteine lyase	SCLY	48 kDa				0	6	10		3352557	5.00758e+06
1293	P46736	Lys-63-specific deubiquitinase BRCC36	BRCC3	36 kDa				0	7	10		3420646	7.83583e+06
1294	Q96EI5	Transcription elongation factor A protein-like 4	TCEAL4	25 kDa				0	7	10		1.42818e+06	3.76123e+06
1295	Q5VV41	Rho guanine nucleotide exchange factor 16	ARHGEF16	80 kDa				0	8	10		1.26631e+07	16241280
1296	Q5BKZ1	DBIRD complex subunit ZNF326	ZNF326	66 kDa				0	8	10		3.56695e+06	6.616e+06
1297	Q96A65	Exocyst complex component 4	EXOC4	111 kDa				0	5	10		1553117	4222316
1298	Q7L5D6	Golgi to ER traffic protein 4 homolog	GET4	37 kDa				0	9	10		7526256	11180230
1299	Q5T1V6	Probable ATP-dependent RNA helicase DDX59	DDX59	69 kDa				0	9	10		4.24723e+06	6.06978e+06
1300	O00151	PDZ and LIM domain protein 1	PDLIM1	36 kDa				0	10	10		1295137	1.49417e+06
1301	Q96EA4	Protein Spindly	SPDL1	70 kDa				0	8	10		9.06141e+06	6.54863e+06
1302	Q13042	Cell division cycle protein 16 homolog	CDC16	72 kDa				0	9	10		1.02352e+07	1.18167e+07
1303	O60518	Ran-binding protein 6	RANBP6	125 kDa				0	8	10		2.60589e+06	5.05772e+06
1304	O94855	Protein transport protein Sec24D	SEC24D	113 kDa				0	10	10		5.52517e+06	8.34938e+06
1305	Q4G0F5	Vacuolar protein sorting-associated protein 26B	VPS26B	39 kDa				0	7	10		6.89423e+06	8814341
1306	Q96EN8	Molybdenum cofactor sulfurase	MOCOS	98 kDa				0	9	10		2.0542e+06	7.85784e+06
1307	O94966	Ubiquitin carboxyl-terminal hydrolase 19	USP19	146 kDa				0	11	10		2216174	2.4373e+06
1308	Q96HE7	ERO1-like protein alpha	ERO1A	54 kDa		✓		0	9	10		2931131	6.66203e+06
1309	Q9H223	EH domain-containing protein 4	EHD4	61 kDa			✓	0	11	10		8.48204e+06	1.90821e+07
1310	Q9BXB4	Oxysterol-binding protein-related protein 11	OSBPL11	84 kDa				0	6	10		5.49715e+06	1.42038e+07
1311	P42696	RNA-binding protein 34	RBM34	49 kDa				0	8	10		2786528	4.25143e+06
1312	Q96SU4	Oxysterol-binding protein-related protein 9	OSBPL9	83 kDa				0	9	10		2.21015e+06	5.21722e+06
1313	P05187	Alkaline phosphatase, placental type	ALPP	58 kDa		✓		0	8	10		2438241	1.79149e+06
1314	P57772	Selenocysteine-specific elongation factor	EEFSEC	65 kDa				0	7	10		2.49889e+06	6.26943e+06
1315	Q08AM6	Protein VAC14 homolog	VAC14	88 kDa				0	10	10		2.92662e+06	4.50898e+06
1316	Q7Z4S6	Kinesin-like protein KIF21A	KIF21A	187 kDa				0	5	10		6.85383e+06	1.6293e+07
1317	Q9C0I1	Myotubularin-related protein 12	MTMR12	86 kDa				0	8	10		4.34882e+06	8.59466e+06
1318	Q5T5C0	Syntaxin-binding protein 5	STXBP5	128 kDa				0	10	10		640381	1.4405e+06
1319	P19823	Inter-alpha-trypsin inhibitor heavy chain H2	ITIH2	106 kDa		✓	✓	0	10	10		2.73979e+06
1320	Q6UB35	Monofunctional C1-tetrahydrofolate synthase, mitochondrial	MTHFD1L	106 kDa				0	9	10		659128	3.97443e+06
1321	P20839	Inosine-5'-monophosphate dehydrogenase 1	IMPDH1	55 kDa				0	8	10		645108	3.97532e+06
1322	Q13330	Metastasis-associated protein MTA1	MTA1	81 kDa				0	7	10		1.75493e+06	1403390
1323	Q8WXH0	Nesprin-2	SYNE2	796 kDa			✓	0	7	10		3.8918e+06	6.22828e+06
1324	Q8ND04	Protein SMG8	SMG8	110 kDa				0	5	10		787396	9078058
1325	Q8TBZ6	tRNA methyltransferase 10 homolog A	TRMT10A	40 kDa			✓	0	5	10		1.78669e+06	2515391
1326	Q9NSV4	Protein diaphanous homolog 3	DIAPH3	137 kDa				0	8	10		Missing Value	635457
1327	P24386	Rab proteins geranylgeranyltransferase component A 1	CHM	73 kDa				0	8	10		4.2156e+06	1.28045e+07
1328	P48735	Isocitrate dehydrogenase [NADP], mitochondrial	IDH2	51 kDa			✓	0	9	10		3.02079e+06	6.1749e+06
1329	Q9UGU0	Transcription factor 20	TCF20	212 kDa				0	6	10		1.75459e+06	2.76651e+06
1330	Q6VY07	Phosphofurin acidic cluster sorting protein 1	PACS1	105 kDa				0	11	10		582606	2815938
1331	Q8WUA2	Peptidyl-prolyl cis-trans isomerase-like 4	PPIL4	57 kDa				0	6	10		1.72456e+06	1934320
1332	Q9UJX2	Cell division cycle protein 23 homolog	CDC23	69 kDa				0	7	10		2.26113e+06	2.62471e+06
1333	Q15059	Bromodomain-containing protein 3	BRD3	80 kDa				0	9	10		1799176
1334	Q7RTP6	[F-actin]-monooxygenase MICAL3	MICAL3	224 kDa				0	3	10		891783	2.9875e+06
1335	Q9UBB9	Tuftelin-interacting protein 11	TFIP11	97 kDa				0	8	10		576046	6.56951e+06
1336	O60826	Coiled-coil domain-containing protein 22	CCDC22	71 kDa				0	7	10		1339866	3504925
1337	O75449	Katanin p60 ATPase-containing subunit A1	KATNA1	56 kDa				0	4	10		1.2883e+06	4431617
1338	O00459	Phosphatidylinositol 3-kinase regulatory subunit beta	PIK3R2	82 kDa				0	5	10		284582	5977313
1339	P49590	Histidine--tRNA ligase, mitochondrial	HARS2	57 kDa				0	7	10			7.97865e+07
1340	Q5K651	Sterile alpha motif domain-containing protein 9	SAMD9	184 kDa				0	3	10			80386300
1341	Q9BRD0	BUD13 homolog	BUD13	71 kDa				0	3	10			44808080
1342	Q8TC07	TBC1 domain family member 15	TBC1D15	79 kDa				0	9	10			2435202
1343	Q8N684	Cleavage and polyadenylation specificity factor subunit 7	CPSF7	52 kDa				0	16	10			8812758
1344	Q12768	WASH complex subunit 5	WASHC5	134 kDa				0	14	10			3.7712e+06
1345	Q08AD1	Calmodulin-regulated spectrin-associated protein 2	CAMSAP2	168 kDa				0	10	10			338906
1346	Q96G03	Phosphoglucomutase-2	PGM2	68 kDa			✓	0	0	10			3.77854e+06
1347	Q68CP9	AT-rich interactive domain-containing protein 2	ARID2	197 kDa				0	8	10			3.16243e+06
1348	P08648	Integrin alpha-5	ITGA5	115 kDa		✓		0	0	10			7.45647e+06
1349	Q12882	Dihydropyrimidine dehydrogenase [NADP(+)]	DPYD	111 kDa				0	0	10			499202
1350	Q9UIW2	Plexin-A1	PLXNA1	211 kDa		✓	✓	0	0	10			329724
1351	Q9NVE7	4'-phosphopantetheine phosphatase	PANK4	86 kDa				0	0	10			582318
1352	Q12905	Interleukin enhancer-binding factor 2	ILF2	43 kDa				16	10	9	1.45985e+08	3.05202e+08	2.31768e+08
1353	P28066	Proteasome subunit alpha type-5	PSMA5	26 kDa			✓	14	8	9	1512116	2.47282e+07	1.33765e+08
1354	Q8NFP9	Neurobeachin	NBEA	328 kDa				12	7	9	2.48084e+07	4.9086e+07	43550670
1355	Q8NDA2	Hemicentin-2	HMCN2	542 kDa				11	10	9	1.6286e+07	12536540	14761860
1356	P00450	Ceruloplasmin	CP	122 kDa		✓	✓	10	9	9	24297750	13141180	2.68021e+07
1357	P08123	Collagen alpha-2(I) chain	COL1A2	129 kDa	✓	✓	✓	10	10	9	697195	30468070	44008600
1358	Q92820	Gamma-glutamyl hydrolase	GGH	36 kDa	✓	✓	✓	9	9	9	1655864	8852270	8.59184e+06
1359	P29279	CCN family member 2	CCN2	38 kDa	✓	✓		9	9	9	1.63027e+06	20175290	2.11603e+07
1360	O00303	Eukaryotic translation initiation factor 3 subunit F	EIF3F	38 kDa	✓			9	9	9	16690750	4.20163e+07	28226480
1361	Q14568	Heat shock protein HSP 90-alpha A2	HSP90AA2P	39 kDa	✓		✓	9	9	9	3.337e+06	1.02945e+07	10213747
1362	P16112	Aggrecan core protein	ACAN	261 kDa		✓		9	8	9	11221481	9.58713e+06	9.88111e+06
1363	P04424	Argininosuccinate lyase	ASL	52 kDa			✓	9	9	9	8.055e+07	1.96212e+08	2.755e+08
1364	P12259	Coagulation factor V	F5	252 kDa		✓		9	11	9	286568	16601800	3.52718e+07
1365	O00299	Chloride intracellular channel protein 1	CLIC1	27 kDa			✓	9	9	9	2.38014e+06	1.42404e+07	12539220
1366	Q01105	Protein SET	SET	33 kDa				8	9	9	2.36704e+06	4.1299e+06	4104219
1367	O14657	Torsin-1B	TOR1B	38 kDa		✓	✓	8	9	9	36065270	1.05906e+08	93446910
1368	P31689	DnaJ homolog subfamily A member 1	DNAJA1	45 kDa			✓	8	8	9	7.4303e+07	5.88287e+07	4.96898e+07
1369	Q15818	Neuronal pentraxin-1	NPTX1	47 kDa	✓	✓		8	9	9	2.51416e+06	4605612	3.79169e+06
1370	P59998	Actin-related protein 2/3 complex subunit 4	ARPC4	20 kDa			✓	8	9	9	9.59183e+06	6.1839e+06	8.80451e+06
1371	Q9BTY2	Plasma alpha-L-fucosidase	FUCA2	54 kDa		✓	✓	8	8	9	4.21785e+07	322626900	502257700
1372	P29122	Proprotein convertase subtilisin/kexin type 6	PCSK6	106 kDa	✓	✓		8	9	9	1.80271e+07	2.62674e+07	3.1783e+07
1373	P11362	Fibroblast growth factor receptor 1	FGFR1	92 kDa		✓		8	9	9	1907758	1.43226e+07	1.48597e+07
1374	P08865	40S ribosomal protein SA	RPSA	33 kDa			✓	8	9	9	2.21893e+06	16266940	2.63126e+07
1375	P22392	Nucleoside diphosphate kinase B	NME2	17 kDa			✓	8	9	9	3.61144e+06	2.95403e+07	37608330
1376	Q9UNF0	Protein kinase C and casein kinase substrate in neurons protein 2	PACSIN2	56 kDa			✓	8	9	9	981382	1.31826e+07	1.57816e+07
1377	P60174	Triosephosphate isomerase	TPI1	31 kDa	✓		✓	8	9	9	1.8213e+07	154435400	2.19314e+08
1378	Q15181	Inorganic pyrophosphatase	PPA1	33 kDa			✓	8	9	9	3098114	2.83911e+07	28839150
1379	Q8NCA5	Protein FAM98A	FAM98A	55 kDa				8	8	9	1.00977e+07	46650560	83466200
1380	O60684	Importin subunit alpha-7	KPNA6	60 kDa				8	9	9	29462280	4.61914e+08	8.74425e+07
1381	Q9Y6W3	Calpain-7	CAPN7	93 kDa			✓	8	0	9	14011340	1.93734e+08	3.87198e+08
1382	Q7Z7G0	Target of Nesh-SH3	ABI3BP	119 kDa	✓	✓		7	7	9	632797	1.25816e+07	2.27756e+07
1383	O75787	Renin receptor	ATP6AP2	39 kDa		✓	✓	7	9	9	4.62751e+06	7.9334e+06	4.75204e+07
1384	P00742	Coagulation factor X	F10	55 kDa		✓		7	9	9	2.28073e+06	903366	1.53696e+06
1385	P41221	Protein Wnt-5a	WNT5A	42 kDa		✓	✓	7	10	9	6.14197e+06	1.21416e+07	2.43365e+07
1386	P06493	Cyclin-dependent kinase 1	CDK1	34 kDa	✓		✓	7	9	9	3.11232e+06	2.21297e+07	3.27754e+07
1387	P21291	Cysteine and glycine-rich protein 1	CSRP1	21 kDa	✓		✓	7	9	9	2.37918e+06	4.32768e+07	40332890
1388	P26599	Polypyrimidine tract-binding protein 1	PTBP1	57 kDa	✓		✓	7	10	9	2492254	3.88385e+07	7.09257e+07
1389	Q9GZP4	PITH domain-containing protein 1	PITHD1	24 kDa				7	9	9	4638229	39942640	6.25905e+07
1390	Q15758	Neutral amino acid transporter B(0)	SLC1A5	57 kDa			✓	7	8	9	1.81747e+06	9794810	19696270
1391	Q12904	Aminoacyl tRNA synthase complex-interacting multifunctional protein 1	AIMP1	34 kDa				7	9	9	4.18747e+06	1.63422e+07	8875681
1392	Q02878	60S ribosomal protein L6	RPL6	33 kDa	✓			6	9	9	369737	446523	218076
1393	Q9H1B5	Xylosyltransferase 2	XYLT2	97 kDa				6	8	9	6591310	8.27411e+07	1.63489e+08
1394	Q12792	Twinfilin-1	TWF1	40 kDa	✓			6	9	9	3.87009e+06	2.18333e+06	1247882
1395	Q16762	Thiosulfate sulfurtransferase	TST	33 kDa				6	9	9	295908	1778988	2597171
1396	Q9UNH7	Sorting nexin-6	SNX6	47 kDa				6	9	9	370297	3.53266e+06	5927744
1397	O43813	Glutathione S-transferase LANCL1	LANCL1	45 kDa				6	9	9	729551	8.63652e+06	1.66168e+07
1398	Q9NR46	Endophilin-B2	SH3GLB2	44 kDa				6	9	9	1.56291e+06	7.98715e+06	6296166
1399	P49354	Protein farnesyltransferase/geranylgeranyltransferase type-1 subunit alpha	FNTA	44 kDa				6	9	9	570957	1.71145e+07	2.86845e+07
1400	Q99747	Gamma-soluble NSF attachment protein	NAPG	35 kDa			✓	6	9	9	1608317	2.88032e+07	45714730
1401	Q9NZL4	Hsp70-binding protein 1	HSPBP1	39 kDa				6	9	9	315231	4435158	3.2882e+06
1402	O75475	PC4 and SFRS1-interacting protein	PSIP1	60 kDa	✓			6	9	9	1.18229e+06	6.55509e+06	1.27664e+07
1403	Q14677	Clathrin interactor 1	CLINT1	68 kDa	✓			6	9	9	1164860	4720095	1.81267e+07
1404	P78346	Ribonuclease P protein subunit p30	RPP30	29 kDa				6	8	9	1.15382e+06	1.27905e+07	19821160
1405	Q9H6Z4	Ran-binding protein 3	RANBP3	60 kDa				6	8	9	1.97431e+06	2.04126e+07	14977970
1406	Q13409	Cytoplasmic dynein 1 intermediate chain 2	DYNC1I2	71 kDa				5	8	9	238691929	5.22854e+08	4.06625e+08
1407	O75367	Core histone macro-H2A.1	MACROH2A1	40 kDa	✓		✓	5	9	9	47703.3	4.39059e+06	7.51714e+06
1408	P29992	Guanine nucleotide-binding protein subunit alpha-11	GNA11	42 kDa			✓	5	10	9	2.07684e+06	18688240	38053570
1409	O76003	Glutaredoxin-3	GLRX3	37 kDa				5	7	9	1.17921e+06	6.83272e+06	8.09314e+06
1410	Q14118	Dystroglycan	DAG1	97 kDa		✓	✓	5	9	9	720310	15026070	1.76574e+07
1411	Q9UKS6	Protein kinase C and casein kinase substrate in neurons protein 3	PACSIN3	48 kDa			✓	5	9	9	0	6.03512e+06	9064115
1412	O75095	Multiple epidermal growth factor-like domains protein 6	MEGF6	161 kDa		✓		5	11	9	215973	5441196	8325181
1413	Q9NZL9	Methionine adenosyltransferase 2 subunit beta	MAT2B	38 kDa			✓	5	11	9	2.52929e+06	2.93982e+07	4.96473e+07
1414	Q13868	Exosome complex component RRP4	EXOSC2	33 kDa				5	7	9	2363898	20515610	42519170
1415	Q8IZ52	Chondroitin sulfate synthase 2	CHPF	85 kDa				5	9	9	2.60891e+06	14864810	37507940
1416	P55263	Adenosine kinase	ADK	41 kDa				5	7	9	585934	8332698	18973100
1417	Q8IWA5	Choline transporter-like protein 2	SLC44A2	80 kDa			✓	5	9	9	1.43496e+06	2286913	4988106
1418	Q9Y5K5	Ubiquitin carboxyl-terminal hydrolase isozyme L5	UCHL5	38 kDa				5	9	9	40738.5	1762953	5496211
1419	Q9UDY4	DnaJ homolog subfamily B member 4	DNAJB4	38 kDa				5	9	9	198479	6611075	7.01334e+06
1420	P67775	Serine/threonine-protein phosphatase 2A catalytic subunit alpha isoform	PPP2CA	36 kDa			✓	5	7	9	471728	2111713	3588776
1421	Q13444	Disintegrin and metalloproteinase domain-containing protein 15	ADAM15	93 kDa		✓	✓	4	7	9	8.66017e+06	53170980	9.07956e+07
1422	P38117	Electron transfer flavoprotein subunit beta	ETFB	28 kDa				4	9	9	0	220958	2941038
1423	Q9Y5X1	Sorting nexin-9	SNX9	67 kDa			✓	4	8	9	3088343	8.10179e+06	2.7935e+07
1424	O76021	Ribosomal L1 domain-containing protein 1	RSL1D1	55 kDa				4	7	9	361617	1436567	1.50345e+06
1425	Q9Y383	Putative RNA-binding protein Luc7-like 2	LUC7L2	47 kDa				4	8	9	514502	8.05393e+06	12257170
1426	P42167	Lamina-associated polypeptide 2, isoforms beta/gamma	TMPO	51 kDa				4	9	9	2.23999e+06	19208590	26217950
1427	Q96TC7	Regulator of microtubule dynamics protein 3	RMDN3	52 kDa	✓			4	8	9	401215	1.21823e+07	1.45392e+07
1428	Q9NR45	Sialic acid synthase	NANS	40 kDa			✓	4	9	9	1.7988e+06	31186630	5.10392e+07
1429	P17301	Integrin alpha-2	ITGA2	129 kDa		✓		4	6	9	101554	9.17729e+06	13402930
1430	Q9Y6M5	Zinc transporter 1	SLC30A1	55 kDa				4	8	9	414352	6454232	9.1644e+06
1431	P49411	Elongation factor Tu, mitochondrial	TUFM	50 kDa			✓	4	8	9	68461.1	2.04138e+06	4.1598e+06
1432	O15397	Importin-8	IPO8	120 kDa				4	7	9	697355	5.1242e+06	8613850
1433	Q92979	Ribosomal RNA small subunit methyltransferase NEP1	EMG1	27 kDa				4	9	9	313370	1.41624e+07	2.30596e+07
1434	Q96J02	E3 ubiquitin-protein ligase Itchy homolog	ITCH	103 kDa			✓	4	8	9		11760280	1.62159e+07
1435	Q14671	Pumilio homolog 1	PUM1	126 kDa				4	7	9		331765600	4.92183e+08
1436	Q8WU90	Zinc finger CCCH domain-containing protein 15	ZC3H15	49 kDa				4	6	9		5.97425e+06	15100530
1437	O95456	Proteasome assembly chaperone 1	PSMG1	33 kDa	✓			3	10	9		1787952	3.34135e+06
1438	P51511	Matrix metalloproteinase-15	MMP15	76 kDa	✓	✓		3	8	9		2.445e+08	3.4445e+08
1439	Q13242	Serine/arginine-rich splicing factor 9	SRSF9	26 kDa				3	8	9		4361957	1.21816e+07
1440	Q9UJ70	N-acetyl-D-glucosamine kinase	NAGK	37 kDa	✓		✓	3	7	9		8.15796e+06	2.39424e+07
1441	Q2VWP7	Protogenin	PRTG	127 kDa		✓		3	7	9		2.84501e+07	2.79984e+07
1442	P07954	Fumarate hydratase, mitochondrial	FH	55 kDa			✓	3	6	9		1.12162e+07	1.05623e+07
1443	Q96B97	SH3 domain-containing kinase-binding protein 1	SH3KBP1	73 kDa				3	7	9		9.57949e+06	1.33781e+07
1444	P04843	Dolichyl-diphosphooligosaccharide--protein glycosyltransferase subunit 1	RPN1	69 kDa		✓		3	8	9		2.02408e+07	2.02117e+07
1445	Q53H96	Pyrroline-5-carboxylate reductase 3	PYCR3	29 kDa				2	6	9		7444666	7073835
1446	P18031	Tyrosine-protein phosphatase non-receptor type 1	PTPN1	50 kDa				2	9	9		5.9035e+06	18797380
1447	Q9UI10	Translation initiation factor eIF-2B subunit delta	EIF2B4	58 kDa				2	10	9		4.2133e+06	7.50967e+06
1448	Q9H788	SH2 domain-containing protein 4A	SH2D4A	53 kDa				2	9	9		1.56734e+07	27806840
1449	Q9UK59	Lariat debranching enzyme	DBR1	62 kDa				2	7	9		7860545	1.42546e+07
1450	Q96I25	Splicing factor 45	RBM17	45 kDa				2	8	9		8.3745e+06	9.74456e+06
1451	Q658Y4	Protein FAM91A1	FAM91A1	94 kDa				2	7	9		2.96026e+06	8.92391e+06
1452	P11498	Pyruvate carboxylase, mitochondrial	PC	130 kDa				2	7	9		3.5077e+06	5.44356e+06
1453	O43148	mRNA cap guanine-N7 methyltransferase	RNMT	55 kDa				2	7	9		991036	1.24628e+06
1454	P18084	Integrin beta-5	ITGB5	88 kDa		✓	✓	2	6	9		8.54418e+06	1.71594e+07
1455	P52948	Nuclear pore complex protein Nup98-Nup96	NUP98	198 kDa				2	4	9		6536627	1.4318e+07
1456	Q641Q2	WASH complex subunit 2A	WASHC2A	147 kDa				2	14	9		1620317	3307717
1457	Q96KB5	Lymphokine-activated killer T-cell-originated protein kinase	PBK	36 kDa				1	9	9		3941875	3.53957e+06
1458	O14879	Interferon-induced protein with tetratricopeptide repeats 3	IFIT3	56 kDa				1	9	9		4.43403e+06	9595997
1459	Q9Y6I4	Ubiquitin carboxyl-terminal hydrolase 3	USP3	59 kDa				1	7	9		1.34504e+07	18788600
1460	Q6NVY1	3-hydroxyisobutyryl-CoA hydrolase, mitochondrial	HIBCH	43 kDa				1	8	9		5.78534e+06	6.3078e+06
1461	Q9Y4X5	E3 ubiquitin-protein ligase ARIH1	ARIH1	64 kDa				1	4	9		1.47659e+06	1.99383e+06
1462	Q9Y4E1	WASH complex subunit 2C	WASHC2C	145 kDa				1	7	9		1574408	2.72131e+06
1463	P67809	Y-box-binding protein 1	YBX1	36 kDa			✓	0	7	9		7.56972e+06	17984210
1464	O00154	Cytosolic acyl coenzyme A thioester hydrolase	ACOT7	42 kDa			✓	0	9	9		46042930	8.63412e+07
1465	Q14684	Ribosomal RNA processing protein 1 homolog B	RRP1B	84 kDa	✓			0	7	9		3271598	3.41588e+06
1466	Q00796	Sorbitol dehydrogenase	SORD	38 kDa			✓	0	6	9		2.16776e+06	3.68758e+06
1467	Q96C86	m7GpppX diphosphatase	DCPS	39 kDa				0	8	9		6.8488e+06	4.91973e+06
1468	Q9NS86	LanC-like protein 2	LANCL2	51 kDa				0	7	9		11110460	8557940
1469	Q13610	Periodic tryptophan protein 1 homolog	PWP1	56 kDa				0	6	9		4437205	9255588
1470	Q96KG9	N-terminal kinase-like protein	SCYL1	90 kDa				0	9	9		2.16578e+06	8.24625e+06
1471	Q96FK6	WD repeat-containing protein 89	WDR89	43 kDa				0	5	9		6067486	1.1831e+07
1472	P31483	Nucleolysin TIA-1 isoform p40	TIA1	43 kDa				0	8	9		3.96174e+06	3750831
1473	Q16643	Drebrin	DBN1	71 kDa				0	8	9		2.82908e+06	6832512
1474	Q13033	Striatin-3	STRN3	87 kDa				0	9	9		1.22331e+07	24810700
1475	Q9UHD9	Ubiquilin-2	UBQLN2	66 kDa				0	7	9		7.93433e+06	1.80639e+07
1476	Q9BRG1	Vacuolar protein-sorting-associated protein 25	VPS25	21 kDa			✓	0	7	9		9.24646e+06	9895070
1477	Q9UJW0	Dynactin subunit 4	DCTN4	52 kDa				0	9	9		471115	5.68942e+06
1478	Q96F86	Enhancer of mRNA-decapping protein 3	EDC3	56 kDa				0	9	9		2.00829e+06	5.39241e+06
1479	Q14692	Ribosome biogenesis protein BMS1 homolog	BMS1	146 kDa				0	4	9		4.96411e+06	8956096
1480	P78504	Protein jagged-1	JAG1	134 kDa		✓		0	9	9		1.03982e+06	2.37595e+06
1481	P18583	Protein SON	SON	264 kDa				0	8	9		7328049	16030860
1482	P19474	E3 ubiquitin-protein ligase TRIM21	TRIM21	54 kDa				0	8	9		4003767	5722527
1483	Q86VN1	Vacuolar protein-sorting-associated protein 36	VPS36	44 kDa			✓	0	9	9		2.75105e+06	3.40218e+06
1484	P36952	Serpin B5	SERPINB5	42 kDa				0	9	9		2.13105e+06	2620492
1485	P49585	Choline-phosphate cytidylyltransferase A	PCYT1A	42 kDa				0	7	9		2868454	2.57876e+07
1486	O96006	Zinc finger BED domain-containing protein 1	ZBED1	78 kDa				0	5	9		1.85281e+06	338173
1487	Q13144	Translation initiation factor eIF-2B subunit epsilon	EIF2B5	80 kDa				0	9	9		3171400	6.27496e+06
1488	Q68EM7	Rho GTPase-activating protein 17	ARHGAP17	95 kDa				0	9	9		1.74562e+06	5.32376e+06
1489	Q8NCN5	Pyruvate dehydrogenase phosphatase regulatory subunit, mitochondrial	PDPR	99 kDa				0	6	9		2228827	3549451
1490	Q9NUJ1	Mycophenolic acid acyl-glucuronide esterase, mitochondrial	ABHD10	34 kDa				0	8	9		2.39722e+06	10030393
1491	Q15424	Scaffold attachment factor B1	SAFB	103 kDa				0	6	9		700156	2080831
1492	Q6WKZ4	Rab11 family-interacting protein 1	RAB11FIP1	137 kDa				0	10	9		2087867	3470183
1493	Q96SB8	Structural maintenance of chromosomes protein 6	SMC6	126 kDa				0	2	9		1.75729e+06	2228777
1494	Q09472	Histone acetyltransferase p300	EP300	264 kDa				0	6	9		4.02909e+06	6214434
1495	Q9Y6A5	Transforming acidic coiled-coil-containing protein 3	TACC3	90 kDa				0	7	9		5.47981e+06	6689420
1496	P55809	Succinyl-CoA:3-ketoacid coenzyme A transferase 1, mitochondrial	OXCT1	56 kDa				0	8	9		3.7558e+06	6.16692e+06
1497	Q9Y4C2	TRPM8 channel-associated factor 1	TCAF1	102 kDa				0	7	9		1953597	5636163
1498	O95785	Protein Wiz	WIZ	179 kDa			✓	0	6	9		1275357	1.66718e+06
1499	Q9P260	RAB11-binding protein RELCH	RELCH	135 kDa				0	6	9		1.44546e+06	2204724
1500	Q15397	Pumilio homolog 3	PUM3	74 kDa				0	7	9		3.14649e+06	2.23408e+06
1501	O15213	WD repeat-containing protein 46	WDR46	68 kDa				0	4	9		7.53374e+06	12778570
1502	Q9P1U1	Actin-related protein 3B	ACTR3B	48 kDa			✓	0	9	9		1197913	1688979
1503	P49959	Double-strand break repair protein MRE11	MRE11	81 kDa				0	8	9		277134	2.74726e+06
1504	O15084	Serine/threonine-protein phosphatase 6 regulatory ankyrin repeat subunit A	ANKRD28	113 kDa				0	4	9		1253263	2.59522e+06
1505	P36551	Oxygen-dependent coproporphyrinogen-III oxidase, mitochondrial	CPOX	50 kDa				0	7	9		2486640	5.24933e+06
1506	O94888	UBX domain-containing protein 7	UBXN7	55 kDa				0	5	9		2.15088e+06	2957250
1507	Q9Y597	BTB/POZ domain-containing protein KCTD3	KCTD3	89 kDa				0	8	9		423578	2.73102e+06
1508	P48200	Iron-responsive element-binding protein 2	IREB2	105 kDa				0	10	9		767578	4.26058e+06
1509	Q6UWE0	E3 ubiquitin-protein ligase LRSAM1	LRSAM1	84 kDa				0	10	9		709424	4.72551e+06
1510	Q7Z6J9	tRNA-splicing endonuclease subunit Sen54	TSEN54	59 kDa				0	7	9		1250406	4.31304e+06
1511	O95985	DNA topoisomerase 3-beta-1	TOP3B	97 kDa				0	7	9		1882030	4622955
1512	P52789	Hexokinase-2	HK2	102 kDa				0	7	9		1.5247e+06	2.80954e+06
1513	Q8IWV7	E3 ubiquitin-protein ligase UBR1	UBR1	200 kDa				0	6	9		4.07639e+06	4302911
1514	Q12899	Tripartite motif-containing protein 26	TRIM26	62 kDa				0	6	9		2218594	3.86556e+06
1515	Q5QJE6	Deoxynucleotidyltransferase terminal-interacting protein 2	DNTTIP2	84 kDa				0	5	9		2.41568e+06	5815062
1516	Q8IZH2	5'-3' exoribonuclease 1	XRN1	194 kDa				0	6	9		107522	700997
1517	O94913	Pre-mRNA cleavage complex 2 protein Pcf11	PCF11	173 kDa				0	2	9		1.80018e+06	5824389
1518	O15344	E3 ubiquitin-protein ligase Midline-1	MID1	75 kDa				0	4	9		225829	1.51047e+06
1519	Q9H6Y2	WD repeat-containing protein 55	WDR55	42 kDa				0	2	9		737522	1.0777e+06
1520	Q86UU1	Pleckstrin homology-like domain family B member 1	PHLDB1	151 kDa				0	4	9		1.82138e+06	2.10432e+06
1521	Q9NR12	PDZ and LIM domain protein 7	PDLIM7	50 kDa				0	9	9		756903	1144602
1522	O00186	Syntaxin-binding protein 3	STXBP3	68 kDa			✓	0	7	9		1.05601e+06	3.33323e+06
1523	Q13496	Myotubularin	MTM1	70 kDa				0	7	9		142389	151017870
1524	Q9NUW8	Tyrosyl-DNA phosphodiesterase 1	TDP1	68 kDa				0	6	9		1.36323e+06	1801530
1525	Q9NYQ6	Cadherin EGF LAG seven-pass G-type receptor 1	CELSR1	329 kDa		✓		0	4	9		66101.1	3.37855e+06
1526	Q96S59	Ran-binding protein 9	RANBP9	78 kDa				0	7	9		395625	3056536
1527	Q9UK61	Protein TASOR	TASOR	189 kDa				0	2	9			7.29545e+07
1528	Q9ULK4	Mediator of RNA polymerase II transcription subunit 23	MED23	156 kDa				0	6	9			1.1097e+07
1529	Q9Y2X7	ARF GTPase-activating protein GIT1	GIT1	84 kDa				0	6	9			12406010
1530	O15164	Transcription intermediary factor 1-alpha	TRIM24	117 kDa				0	4	9			41203460
1531	O60934	Nibrin	NBN	85 kDa				0	3	9			8.08569e+06
1532	Q6ZMI0	Protein phosphatase 1 regulatory subunit 21	PPP1R21	88 kDa				0	1	9			1.59689e+06
1533	P35813	Protein phosphatase 1A	PPM1A	42 kDa				0	8	9			3.59727e+08
1534	Q5VZE5	N-alpha-acetyltransferase 35, NatC auxiliary subunit	NAA35	84 kDa				0	16	9			3062697
1535	Q9P253	Vacuolar protein sorting-associated protein 18 homolog	VPS18	110 kDa				0	10	9			3895075
1536	Q6VN20	Ran-binding protein 10	RANBP10	67 kDa				0	5	9			2.98601e+06
1537	Q9BRZ2	E3 ubiquitin-protein ligase TRIM56	TRIM56	81 kDa				0	2	9			1.63809e+06
1538	Q8TEW0	Partitioning defective 3 homolog	PARD3	151 kDa		✓		0	4	9			2.46077e+06
1539	Q4LE39	AT-rich interactive domain-containing protein 4B	ARID4B	148 kDa				0	4	9			234753
1540	Q96JG6	Syndetin	VPS50	111 kDa			✓	0	12	9			3.61508e+06
1541	Q05639	Elongation factor 1-alpha 2	EEF1A2	50 kDa				0	0	9			1.7774e+06
1542	O60645	Exocyst complex component 3	EXOC3	86 kDa				0	0	9			1.07371e+06
1543	O43149	Zinc finger ZZ-type and EF-hand domain-containing protein 1	ZZEF1	331 kDa				0	0	9			670200
1544	P09493	Tropomyosin alpha-1 chain	TPM1	33 kDa				14	8	8	4.24515e+07	9.6575e+07	79125890
1545	Q13363	C-terminal-binding protein 1	CTBP1	48 kDa				12	6	8	1.55519e+06	5.99719e+06	3.25916e+07
1546	P20338	Ras-related protein Rab-4A	RAB4A	24 kDa			✓	12	7	8	956748	1.23626e+07	71415500
1547	Q6ZMP0	Thrombospondin type-1 domain-containing protein 4	THSD4	112 kDa		✓	✓	11	13	8	6.30279e+07	1.08681e+08	9.17748e+07
1548	Q12884	Prolyl endopeptidase FAP	FAP	88 kDa	✓			10	11	8	9295249	1.30119e+07	1.53937e+07
1549	P00451	Coagulation factor VIII	F8	267 kDa		✓		10	9	8	9047820	15521510	11186017
1550	O75882	Attractin	ATRN	159 kDa		✓	✓	10	0	8	3.67582e+07	7.50957e+07	4.43419e+07
1551	P62906	60S ribosomal protein L10a	RPL10A	25 kDa			✓	10	8	8	4522748	1.52774e+07	1.37534e+07
1552	P78356	Phosphatidylinositol 5-phosphate 4-kinase type-2 beta	PIP4K2B	47 kDa				10	7	8	2.51407e+07	22331620	21885140
1553	P00746	Complement factor D	CFD	27 kDa		✓	✓	8	8	8	4.11355e+07	1.53497e+08	1.44688e+08
1554	Q7L5N1	COP9 signalosome complex subunit 6	COPS6	36 kDa				8	8	8	8.08913e+06	9067301	7.6322e+06
1555	Q06033	Inter-alpha-trypsin inhibitor heavy chain H3	ITIH3	100 kDa		✓	✓	8	9	8	343676	1503716	345437
1556	Q9UBR2	Cathepsin Z	CTSZ	34 kDa		✓	✓	8	7	8	2.07378e+06	21541380	2.58367e+07
1557	P14314	Glucosidase 2 subunit beta	PRKCSH	59 kDa		✓		8	8	8	4.03677e+07	5.84396e+07	84571560
1558	Q9HBI1	Beta-parvin	PARVB	42 kDa	✓			8	8	8	8.29376e+07	8.02761e+07	73847690
1559	P02458	Collagen alpha-1(II) chain	COL2A1	142 kDa		✓		8	9	8	4.23745e+06	5.69052e+06	4649742
1560	P37802	Transgelin-2	TAGLN2	22 kDa			✓	8	8	8	2.08477e+07	188368400	255178700
1561	Q92890	Ubiquitin recognition factor in ER-associated degradation protein 1	UFD1	35 kDa				8	8	8	5.87512e+07	9.81689e+07	1.26969e+08
1562	P63241	Eukaryotic translation initiation factor 5A-1	EIF5A	17 kDa				8	10	8	1.8506e+07	47945480	78101870
1563	O15143	Actin-related protein 2/3 complex subunit 1B	ARPC1B	41 kDa			✓	7	8	8	5.03735e+06	4626296	4439543
1564	P10646	Tissue factor pathway inhibitor	TFPI	35 kDa		✓		7	8	8	1.07943e+06	1.0239e+06	4.79206e+06
1565	P48745	CCN family member 3	CCN3	39 kDa		✓		7	7	8	1.01027e+06	337296	292127
1566	P04004	Vitronectin	VTN	54 kDa		✓	✓	7	10	8	4.63548e+06	7.7493e+06	2.73107e+06
1567	P06280	Alpha-galactosidase A	GLA	49 kDa	✓	✓	✓	7	9	8	903472	5178580	20043200
1568	P39687	Acidic leucine-rich nuclear phosphoprotein 32 family member A	ANP32A	29 kDa				7	8	8	3.17042e+06	31899820	2.76567e+07
1569	Q04917	14-3-3 protein eta	YWHAH	28 kDa	✓		✓	7	7	8	1791715	2.25261e+07	29288660
1570	P28074	Proteasome subunit beta type-5	PSMB5	28 kDa			✓	7	8	8	1.2474e+06	18205720	1.00513e+07
1571	Q99733	Nucleosome assembly protein 1-like 4	NAP1L4	43 kDa				7	8	8	7.98624e+06	65309460	1.65277e+08
1572	P22455	Fibroblast growth factor receptor 4	FGFR4	88 kDa		✓		7	6	8	1.11203e+06	3.78057e+07	4.59369e+07
1573	P23193	Transcription elongation factor A protein 1	TCEA1	34 kDa				7	8	8	601978	1.06035e+07	1.95432e+07
1574	Q15404	Ras suppressor protein 1	RSU1	32 kDa			✓	7	8	8	9.85101e+06	1.30148e+07	1.89931e+07
1575	Q9Y281	Cofilin-2	CFL2	19 kDa			✓	7	8	8	1.74024e+06	7097208	5.47049e+06
1576	Q9UI12	V-type proton ATPase subunit H	ATP6V1H	56 kDa			✓	7	9	8	2.98983e+08	1.68043e+08	108874410
1577	O14773	Tripeptidyl-peptidase 1	TPP1	61 kDa		✓	✓	6	9	8	3.39713e+06	9.37571e+06	7.48518e+06
1578	Q99519	Sialidase-1	NEU1	45 kDa	✓	✓	✓	6	8	8	349684	9175071	13687260
1579	P22694	cAMP-dependent protein kinase catalytic subunit beta	PRKACB	41 kDa			✓	6	7	8	323068	7914451	17025680
1580	P00736	Complement C1r subcomponent	C1R	80 kDa		✓	✓	6	8	8	2.16077e+06	5.38506e+06	5507927
1581	Q7Z406	Myosin-14	MYH14	228 kDa			✓	6	7	8	805925	1.40606e+07	1.36956e+07
1582	Q66K79	Carboxypeptidase Z	CPZ	74 kDa	✓	✓		6	9	8	169404	7.63739e+06	1.23623e+07
1583	P52597	Heterogeneous nuclear ribonucleoprotein F	HNRNPF	46 kDa				6	8	8	357731	14967490	2.6486e+07
1584	Q7LGC8	Carbohydrate sulfotransferase 3	CHST3	55 kDa				6	6	8	1716625	3.02813e+07	6.19607e+07
1585	Q96C19	EF-hand domain-containing protein D2	EFHD2	27 kDa				6	9	8	2.17578e+06	5285937	7.73657e+06
1586	P13984	General transcription factor IIF subunit 2	GTF2F2	28 kDa				6	8	8	368757	798236	1.63467e+06
1587	P10644	cAMP-dependent protein kinase type I-alpha regulatory subunit	PRKAR1A	43 kDa				6	5	8	681275	6244113	2998574
1588	Q9NPB8	Glycerophosphocholine phosphodiesterase GPCPD1	GPCPD1	76 kDa				6	0	8	1.1107e+06	5.99511e+06	2.46222e+07
1589	P53004	Biliverdin reductase A	BLVRA	33 kDa			✓	5	7	8	1.36266e+06	3.25904e+06	3626152
1590	P08236	Beta-glucuronidase	GUSB	75 kDa		✓	✓	5	8	8	114293	6.36717e+06	8765599
1591	Q9BV20	Methylthioribose-1-phosphate isomerase	MRI1	39 kDa				5	8	8	Missing Value	6.97971e+06	1.31587e+07
1592	Q8IZ07	Ankyrin repeat domain-containing protein 13A	ANKRD13A	68 kDa				5	7	8	2.53519e+06	3.81013e+07	5.24459e+07
1593	P41227	N-alpha-acetyltransferase 10	NAA10	26 kDa				5	6	8	782841	3.97285e+06	30228960
1594	Q68CQ7	Glycosyltransferase 8 domain-containing protein 1	GLT8D1	42 kDa				5	7	8	1.37407e+06	2.42433e+06	3.25326e+06
1595	Q13011	Delta(3,5)-Delta(2,4)-dienoyl-CoA isomerase, mitochondrial	ECH1	36 kDa	✓		✓	4	7	8	161797	4.66997e+06	6.42431e+06
1596	Q92688	Acidic leucine-rich nuclear phosphoprotein 32 family member B	ANP32B	29 kDa			✓	4	7	8	271088	1.36766e+06	46180700
1597	Q96CT7	Coiled-coil domain-containing protein 124	CCDC124	26 kDa				4	8	8	3.03479e+06	9.70232e+06	1.71075e+07
1598	Q9BWS9	Chitinase domain-containing protein 1	CHID1	45 kDa		✓	✓	4	7	8	189820	5.52036e+06	7.91366e+06
1599	Q13153	Serine/threonine-protein kinase PAK 1	PAK1	61 kDa				4	6	8	313080	1.45767e+07	3.54047e+07
1600	Q969G3	SWI/SNF-related matrix-associated actin-dependent regulator of chromatin subfamily E member 1	SMARCE1	47 kDa				4	8	8	723578	2.23749e+06	6153979
1601	P52294	Importin subunit alpha-5	KPNA1	60 kDa				4	8	8	91047.1	3766613	6.32619e+06
1602	P52594	Arf-GAP domain and FG repeat-containing protein 1	AGFG1	58 kDa				4	6	8	2200434	4.43422e+07	3.36936e+07
1603	P25098	Beta-adrenergic receptor kinase 1	GRK2	80 kDa				4	7	8	118597	11599570	7.20842e+06
1604	P48960	Adhesion G protein-coupled receptor E5	ADGRE5	92 kDa		✓	✓	3	7	8	2.2212e+06	10126412	1.15933e+07
1605	Q14114	Low-density lipoprotein receptor-related protein 8	LRP8	106 kDa		✓		3	6	8	5142840		344202
1606	Q9NX58	Cell growth-regulating nucleolar protein	LYAR	44 kDa				3	8	8	87157.3	197541	441582
1607	P24752	Acetyl-CoA acetyltransferase, mitochondrial	ACAT1	45 kDa			✓	3	8	8	1.25325e+06	1.17715e+07	25380850
1608	Q9BRT9	DNA replication complex GINS protein SLD5	GINS4	26 kDa				3	8	8	694930	1.78391e+07	3.05549e+07
1609	P42574	Caspase-3	CASP3	32 kDa				3	6	8	59067.3	8.60392e+06	1.27658e+07
1610	Q96GM8	Target of EGR1 protein 1	TOE1	57 kDa	✓			3	8	8	264355	2997334	3.27991e+06
1611	P05156	Complement factor I	CFI	66 kDa	✓	✓	✓	3	7	8	44088.4	6.85326e+06	12718470
1612	O75937	DnaJ homolog subfamily C member 8	DNAJC8	30 kDa	✓			2	7	8		2.80712e+08	661347100
1613	P18615	Negative elongation factor E	NELFE	43 kDa				2	5	8		5.41824e+06	10266667
1614	Q6YN16	Hydroxysteroid dehydrogenase-like protein 2	HSDL2	45 kDa				2	7	8		2.33402e+07	3.88912e+07
1615	P98082	Disabled homolog 2	DAB2	82 kDa				2	6	8		41372950	5.6943e+06
1616	Q8IUI8	Cytokine receptor-like factor 3	CRLF3	50 kDa	✓			2	5	8		542483	2.95209e+06
1617	Q9NVM4	Protein arginine N-methyltransferase 7	PRMT7	78 kDa				2	8	8		8994990	20031830
1618	Q9BTE6	Alanyl-tRNA editing protein Aarsd1	AARSD1	45 kDa				2	6	8		12864115	1.58295e+07
1619	O14929	Histone acetyltransferase type B catalytic subunit	HAT1	50 kDa				2	8	8		2.10679e+06	9.72722e+06
1620	P13489	Ribonuclease inhibitor	RNH1	50 kDa			✓	2	8	8		6.99808e+07	164982500
1621	Q8NEZ5	F-box only protein 22	FBXO22	45 kDa				2	8	8		5.79662e+06	9.96265e+06
1622	Q5R3I4	Tetratricopeptide repeat protein 38	TTC38	53 kDa			✓	2	7	8		1.54028e+07	21949770
1623	Q16790	Carbonic anhydrase 9	CA9	50 kDa	✓	✓		2	6	8		5866252	3.70871e+06
1624	O95801	Tetratricopeptide repeat protein 4	TTC4	45 kDa				2	8	8		3362580	9522622
1625	Q96QC0	Serine/threonine-protein phosphatase 1 regulatory subunit 10	PPP1R10	99 kDa				2	6	8		6.97333e+06	7.49763e+06
1626	Q8TF74	WAS/WASL-interacting protein family member 2	WIPF2	46 kDa				2	5	8		5.11519e+06	7540754
1627	O60443	Gasdermin-E	GSDME	55 kDa				2	7	8		2.47251e+07	44123780
1628	Q53FA7	Quinone oxidoreductase PIG3	TP53I3	36 kDa				1	4	8		8.54001e+06	1.69972e+07
1629	P50213	Isocitrate dehydrogenase [NAD] subunit alpha, mitochondrial	IDH3A	40 kDa				1	8	8		1.34783e+07	1.98937e+07
1630	Q9BQ67	Glutamate-rich WD repeat-containing protein 1	GRWD1	49 kDa	✓			1	8	8		3739130	5.49664e+06
1631	Q5EBL4	RILP-like protein 1	RILPL1	47 kDa				1	3	8		1.31204e+07	21486920
1632	Q8N8Z6	Discoidin, CUB and LCCL domain-containing protein 1	DCBLD1	78 kDa		✓		0	6	8		8.19849e+06	1.02191e+07
1633	Q05048	Cleavage stimulation factor subunit 1	CSTF1	48 kDa				0	7	8		1.80357e+07
1634	P19623	Spermidine synthase	SRM	34 kDa				0	8	8		1.62772e+07	21704490
1635	Q9UI08	Ena/VASP-like protein	EVL	45 kDa				0	8	8		806024	1.82635e+06
1636	Q7Z4V5	Hepatoma-derived growth factor-related protein 2	HDGFL2	74 kDa				0	6	8		3.86387e+06	9.83755e+06
1637	Q96I24	Far upstream element-binding protein 3	FUBP3	62 kDa				0	7	8		4918421	9.2655e+06
1638	Q53HC9	EARP and GARP complex-interacting protein 1	EIPR1	44 kDa				0	7	8		1.26934e+06	2.8058e+06
1639	P52907	F-actin-capping protein subunit alpha-1	CAPZA1	33 kDa			✓	0	9	8		2.7369e+06	8.92704e+06
1640	O00566	U3 small nucleolar ribonucleoprotein protein MPP10	MPHOSPH10	79 kDa				0	8	8		6590351	1.25083e+07
1641	Q9UBQ7	Glyoxylate reductase/hydroxypyruvate reductase	GRHPR	36 kDa			✓	0	8	8		6.50985e+06	1.01772e+07
1642	Q5T3I0	G patch domain-containing protein 4	GPATCH4	50 kDa				0	6	8		6050115	6.98409e+06
1643	Q8IYB8	ATP-dependent RNA helicase SUPV3L1, mitochondrial	SUPV3L1	88 kDa				0	9	8		5.57948e+06	1.30062e+07
1644	Q99986	Serine/threonine-protein kinase VRK1	VRK1	45 kDa				0	7	8		5.94305e+06	6.75652e+06
1645	Q969X6	U3 small nucleolar RNA-associated protein 4 homolog	UTP4	77 kDa				0	7	8		7792230	1.32529e+07
1646	Q99439	Calponin-2	CNN2	34 kDa				0	8	8		5239847	1.01966e+07
1647	Q8WVV9	Heterogeneous nuclear ribonucleoprotein L-like	HNRNPLL	60 kDa				0	9	8		1.12902e+07	2.27135e+07
1648	P07203	Glutathione peroxidase 1	GPX1	22 kDa				0	8	8		1.879e+06	3.87353e+06
1649	Q15398	Disks large-associated protein 5	DLGAP5	95 kDa				0	12	8		3.21735e+06	6.42353e+06
1650	O15160	DNA-directed RNA polymerases I and III subunit RPAC1	POLR1C	39 kDa				0	7	8		4.58082e+06	7.55885e+06
1651	Q8TEM1	Nuclear pore membrane glycoprotein 210	NUP210	205 kDa		✓		0	5	8		2.51389e+06	3.89357e+06
1652	O75909	Cyclin-K	CCNK	64 kDa				0	6	8		2056581	5.89395e+06
1653	Q14847	LIM and SH3 domain protein 1	LASP1	30 kDa				0	8	8		3.91009e+06	8.57038e+06
1654	Q9NY93	Probable ATP-dependent RNA helicase DDX56	DDX56	62 kDa				0	7	8		2.53728e+06	2587899
1655	Q8NDH3	Probable aminopeptidase NPEPL1	NPEPL1	56 kDa				0	7	8		209338	1.93539e+06
1656	O94763	Unconventional prefoldin RPB5 interactor 1	URI1	60 kDa				0	7	8		6265986	5242101
1657	Q969S3	Zinc finger protein 622	ZNF622	54 kDa				0	6	8		1.77393e+06	2234365
1658	Q15554	Telomeric repeat-binding factor 2	TERF2	60 kDa				0	9	8		2.49028e+06	5739846
1659	Q6XQN6	Nicotinate phosphoribosyltransferase	NAPRT	58 kDa			✓	0	7	8		3.21081e+06	5485173
1660	P17612	cAMP-dependent protein kinase catalytic subunit alpha	PRKACA	41 kDa			✓	0	6	8		3.32734e+06	5.14988e+06
1661	P33240	Cleavage stimulation factor subunit 2	CSTF2	61 kDa				0	5	8		3.46535e+06	6.12684e+06
1662	Q9UNP9	Peptidyl-prolyl cis-trans isomerase E	PPIE	33 kDa				0	7	8		1.23224e+06	2.74842e+06
1663	O60504	Vinexin	SORBS3	75 kDa				0	6	8		6030544	7.73896e+06
1664	O95202	Mitochondrial proton/calcium exchanger protein	LETM1	83 kDa				0	7	8		5665894	1.30865e+07
1665	Q8N0Z6	Tetratricopeptide repeat protein 5	TTC5	49 kDa				0	5	8		1.41489e+06	4.35706e+06
1666	Q96ME1	F-box/LRR-repeat protein 18	FBXL18	88 kDa				0	5	8		1.85627e+06	1.86715e+06
1667	Q7Z7L7	Protein zer-1 homolog	ZER1	88 kDa				0	8	8		9380572	1.59197e+07
1668	Q13472	DNA topoisomerase 3-alpha	TOP3A	112 kDa				0	3	8		8.58227e+06	8.6469e+06
1669	Q8N0V5	N-acetyllactosaminide beta-1,6-N-acetylglucosaminyl-transferase	GCNT2	46 kDa				0	9	8		1159389	2.24962e+06
1670	Q9UBT7	Alpha-catulin	CTNNAL1	82 kDa				0	6	8		3.45209e+06	8.82671e+06
1671	O60508	Pre-mRNA-processing factor 17	CDC40	66 kDa				0	6	8		4346047	6267709
1672	O00534	von Willebrand factor A domain-containing protein 5A	VWA5A	86 kDa				0	8	8		2.89968e+06	5205404
1673	Q9BUI4	DNA-directed RNA polymerase III subunit RPC3	POLR3C	61 kDa				0	7	8		758331	2495288
1674	Q8WVC0	RNA polymerase-associated protein LEO1	LEO1	75 kDa				0	9	8		1.40974e+06	2.9821e+06
1675	O95819	Mitogen-activated protein kinase kinase kinase kinase 4	MAP4K4	142 kDa				0	4	8		4064422	6831864
1676	Q9H568	Actin-like protein 8	ACTL8	41 kDa				0	6	8		4.17393e+06	8752388
1677	Q9Y2S7	Polymerase delta-interacting protein 2	POLDIP2	42 kDa				0	6	8		3.77157e+06	5.24589e+06
1678	Q5TFE4	5'-nucleotidase domain-containing protein 1	NT5DC1	52 kDa				0	5	8		3924049	10162989
1679	Q14669	E3 ubiquitin-protein ligase TRIP12	TRIP12	220 kDa				0	8	8		7615180	1.37902e+07
1680	P37837	Transaldolase	TALDO1	38 kDa			✓	0	8	8		8.24688e+06	1.40175e+07
1681	P29372	DNA-3-methyladenine glycosylase	MPG	33 kDa				0	8	8		3.27489e+06	6.2066e+06
1682	P18669	Phosphoglycerate mutase 1	PGAM1	29 kDa			✓	0	7	8		3.19349e+06	4848645
1683	Q9NVS9	Pyridoxine-5'-phosphate oxidase	PNPO	30 kDa				0	6	8		7.28544e+06	1.18815e+07
1684	Q86X76	Deaminated glutathione amidase	NIT1	36 kDa				0	6	8		1890169	5.88213e+06
1685	Q8WUQ7	Cactin	CACTIN	89 kDa				0	6	8		292415	1.08166e+06
1686	Q9H6R4	Nucleolar protein 6	NOL6	128 kDa				0	3	8		4.48904e+06	3.72677e+06
1687	Q86W50	RNA N6-adenosine-methyltransferase METTL16	METTL16	64 kDa				0	5	8		844310	3.19566e+06
1688	O60524	Nuclear export mediator factor NEMF	NEMF	123 kDa				0	7	8		1362914	2.07023e+06
1689	P15121	Aldo-keto reductase family 1 member B1	AKR1B1	36 kDa			✓	0	6	8		3.81913e+06	3.86867e+06
1690	P49023	Paxillin	PXN	65 kDa				0	8	8		306957	6.35062e+06
1691	Q9BRJ7	Tudor-interacting repair regulator protein	NUDT16L1	23 kDa				0	6	8		1.04635e+06	2.82342e+06
1692	Q15599	Na(+)/H(+) exchange regulatory cofactor NHE-RF2	SLC9A3R2	37 kDa			✓	0	8	8		1.69422e+06	3681171
1693	Q96HS1	Serine/threonine-protein phosphatase PGAM5, mitochondrial	PGAM5	32 kDa				0	7	8		349375	3.78627e+06
1694	Q9H267	Vacuolar protein sorting-associated protein 33B	VPS33B	71 kDa				0	8	8		982494	3.5115e+06
1695	Q9NUQ7	Ufm1-specific protease 2	UFSP2	53 kDa				0	7	8		1.06296e+06	2702159
1696	Q8IVT2	Mitotic interactor and substrate of PLK1	MISP	75 kDa				0	6	8		2243062	3149851
1697	Q8NBF6	Late secretory pathway protein AVL9 homolog	AVL9	72 kDa				0	7	8		1530579	3430123
1698	P52888	Thimet oligopeptidase	THOP1	79 kDa				0	7	8		3.93736e+06	5.78011e+06
1699	O15014	Zinc finger protein 609	ZNF609	151 kDa				0	4	8		3863245	9.55742e+06
1700	O75874	Isocitrate dehydrogenase [NADP] cytoplasmic	IDH1	47 kDa			✓	0	9	8		2.06966e+06	3.2152e+06
1701	Q9H0K6	Pseudouridylate synthase 7 homolog-like protein	PUS7L	81 kDa				0	2	8		1459834	4229703
1702	Q9H0E9	Bromodomain-containing protein 8	BRD8	135 kDa				0	5	8		142100	87538.3
1703	Q96I99	Succinate--CoA ligase [GDP-forming] subunit beta, mitochondrial	SUCLG2	47 kDa				0	3	8		2.87825e+06
1704	Q92759	General transcription factor IIH subunit 4	GTF2H4	52 kDa				0	5	8		2.11671e+06	4.45887e+06
1705	Q6IA69	Glutamine-dependent NAD(+) synthetase	NADSYN1	79 kDa				0	7	8		4.77047e+06	1.00307e+07
1706	Q8WUM0	Nuclear pore complex protein Nup133	NUP133	129 kDa				0	4	8		1.14944e+06	2.72842e+06
1707	Q8IWZ8	SURP and G-patch domain-containing protein 1	SUGP1	72 kDa				0	7	8		766684	3.62783e+06
1708	Q8NHQ9	ATP-dependent RNA helicase DDX55	DDX55	69 kDa				0	7	8		1469525	5.46516e+06
1709	O94880	PHD finger protein 14	PHF14	100 kDa				0	4	8		1.27043e+06	3457769
1710	Q04756	Hepatocyte growth factor activator	HGFAC	71 kDa		✓		0	9	8		2.45252e+06
1711	Q92556	Engulfment and cell motility protein 1	ELMO1	84 kDa				0	7	8		2028570	3.48352e+06
1712	Q15645	Pachytene checkpoint protein 2 homolog	TRIP13	49 kDa				0	7	8		3661281	4711830
1713	Q9BZI7	Regulator of nonsense transcripts 3B	UPF3B	58 kDa				0	7	8		1355925	5.27605e+06
1714	Q96RU3	Formin-binding protein 1	FNBP1	71 kDa				0	7	8		2255108	6038661
1715	Q7L592	Protein arginine methyltransferase NDUFAF7, mitochondrial	NDUFAF7	49 kDa				0	3	8		1208466	4557034
1716	P26374	Rab proteins geranylgeranyltransferase component A 2	CHML	74 kDa				0	5	8		2.37042e+06
1717	Q96CV9	Optineurin	OPTN	66 kDa				0	6	8		3.98464e+06	8.77736e+06
1718	P28340	DNA polymerase delta catalytic subunit	POLD1	124 kDa				0	9	8		1.612e+06	1615697
1719	Q9BQP7	Mitochondrial genome maintenance exonuclease 1	MGME1	39 kDa				0	5	8		1.95749e+06	5249467
1720	Q9H089	Large subunit GTPase 1 homolog	LSG1	75 kDa				0	7	8		680671	1306606
1721	Q15031	Probable leucine--tRNA ligase, mitochondrial	LARS2	102 kDa				0	6	8		2.8632e+06	3612422
1722	Q9NXX6	Non-structural maintenance of chromosomes element 4 homolog A	NSMCE4A	44 kDa				0	4	8		656183	9.22084e+06
1723	Q96P11	Probable 28S rRNA (cytosine-C(5))-methyltransferase	NSUN5	47 kDa				0	5	8		5375238	5.04571e+06
1724	Q9ULU4	Protein kinase C-binding protein 1	ZMYND8	132 kDa				0	3	8		1902544	2506996
1725	P50895	Basal cell adhesion molecule	BCAM	67 kDa		✓	✓	0	7	8		431197	5.61278e+06
1726	P32455	Guanylate-binding protein 1	GBP1	68 kDa				0	5	8		215144	1.24941e+07
1727	P53814	Smoothelin	SMTN	99 kDa				0	8	8		979345	3.35556e+06
1728	P16435	NADPH--cytochrome P450 reductase	POR	77 kDa				0	6	8		37922	31461.6
1729	Q96CW5	Gamma-tubulin complex component 3	TUBGCP3	104 kDa				0	7	8		1.71494e+06	2.71484e+06
1730	Q99797	Mitochondrial intermediate peptidase	MIPEP	81 kDa				0	3	8		2.89759e+06	7.02244e+06
1731	P09525	Annexin A4	ANXA4	36 kDa			✓	0	7	8		2756682	3561602
1732	Q5XPI4	E3 ubiquitin-protein ligase RNF123	RNF123	149 kDa				0	7	8		1.32368e+06	2707117
1733	Q6P4E1	Protein CASC4	CASC4	49 kDa				0	6	8		2.29048e+06	3746778
1734	P00390	Glutathione reductase, mitochondrial	GSR	56 kDa			✓	0	8	8		1.67722e+06	3.98203e+06
1735	O00471	Exocyst complex component 5	EXOC5	82 kDa				0	9	8		182647	669457
1736	Q15643	Thyroid receptor-interacting protein 11	TRIP11	228 kDa				0	3	8		1.52926e+06	2.73242e+06
1737	A2RUC4	tRNA wybutosine-synthesizing protein 5	TYW5	37 kDa				0	6	8		823730	1158300
1738	Q96IV0	Peptide-N(4)-(N-acetyl-beta-glucosaminyl)asparagine amidase	NGLY1	74 kDa				0	4	8		1.90915e+06	4.44177e+06
1739	P20073	Annexin A7	ANXA7	53 kDa			✓	0	6	8		Missing Value	1.0689e+06
1740	Q8WYP5	Protein ELYS	AHCTF1	253 kDa			✓	0	4	8		1695295	3.98039e+06
1741	Q9BYJ9	YTH domain-containing family protein 1	YTHDF1	61 kDa				0	8	8		781228	2.04247e+06
1742	Q8WUA4	General transcription factor 3C polypeptide 2	GTF3C2	101 kDa				0	5	8		901800	1.61751e+06
1743	P54760	Ephrin type-B receptor 4	EPHB4	108 kDa		✓	✓	0	6	8		366050
1744	Q8TDQ7	Glucosamine-6-phosphate isomerase 2	GNPDA2	31 kDa				0	7	8			1.68783e+08
1745	Q9P2B4	CTTNBP2 N-terminal-like protein	CTTNBP2NL	70 kDa				0	4	8			1.09212e+07
1746	Q5MIZ7	Serine/threonine-protein phosphatase 4 regulatory subunit 3B	PPP4R3B	97 kDa				0	7	8			1.85959e+07
1747	Q01664	Transcription factor AP-4	TFAP4	39 kDa				0	2	8			10204887
1748	P27361	Mitogen-activated protein kinase 3	MAPK3	43 kDa				0	0	8			6.63108e+06
1749	Q8IZP0	Abl interactor 1	ABI1	55 kDa			✓	0	12	8			1900404
1750	O95361	Tripartite motif-containing protein 16	TRIM16	64 kDa				0	8	8			8803978
1751	Q71RC2	La-related protein 4	LARP4	81 kDa				0	0	8			2.60132e+06
1752	Q15910	Histone-lysine N-methyltransferase EZH2	EZH2	85 kDa				0	8	8			1688406
1753	P46937	Transcriptional coactivator YAP1	YAP1	54 kDa				0	4	8			1.07299e+07
1754	O75170	Serine/threonine-protein phosphatase 6 regulatory subunit 2	PPP6R2	105 kDa				0	0	8			6985354
1755	Q9NUL3	Double-stranded RNA-binding protein Staufen homolog 2	STAU2	63 kDa				0	8	8			1.08076e+07
1756	Q8N108	Mesoderm induction early response protein 1	MIER1	58 kDa				0	8	8			1.47685e+06
1757	P13929	Beta-enolase	ENO3	47 kDa			✓	0	0	8			5638578
1758	Q9Y4B5	Microtubule cross-linking factor 1	MTCL1	210 kDa				0	0	8			1909915
1759	O75886	Signal transducing adapter molecule 2	STAM2	58 kDa				0	0	8			7984627
1760	Q9C0B5	Palmitoyltransferase ZDHHC5	ZDHHC5	78 kDa				0	0	8			1900130
1761	Q92889	DNA repair endonuclease XPF	ERCC4	104 kDa				0	6	8			1.23758e+06
1762	O60287	Nucleolar pre-ribosomal-associated protein 1	URB1	254 kDa				0	0	8			4.53214e+06
1763	P19447	General transcription and DNA repair factor IIH helicase subunit XPB	ERCC3	89 kDa				0	6	8			2.82013e+06
1764	Q9Y2V7	Conserved oligomeric Golgi complex subunit 6	COG6	73 kDa				0	5	8			3.60863e+06
1765	Q8IUR7	Armadillo repeat-containing protein 8	ARMC8	76 kDa				0	6	8			2.3455e+06
1766	Q9NZW5	MAGUK p55 subfamily member 6	MPP6	61 kDa			✓	0	14	8			4541056
1767	P42025	Beta-centractin	ACTR1B	42 kDa			✓	0	5	8			955939
1768	O43150	Arf-GAP with SH3 domain, ANK repeat and PH domain-containing protein 2	ASAP2	112 kDa				0	0	8			241848
1769	P25788	Proteasome subunit alpha type-3	PSMA3	28 kDa			✓	12	7	7	1.12728e+06	942296	510846
1770	Q6S8J3	POTE ankyrin domain family member E	POTEE	121 kDa			✓	12	0	7	2.48128e+06	4.5299e+07	84644510
1771	Q9GZT9	Egl nine homolog 1	EGLN1	46 kDa				10	9	7	3.36856e+06	6.89839e+06	5.65503e+06
1772	P54727	UV excision repair protein RAD23 homolog B	RAD23B	43 kDa				10	0	7	7057925	9459049	12678170
1773	P05121	Plasminogen activator inhibitor 1	SERPINE1	45 kDa		✓	✓	8	8	7	154535	9.09457e+06	7.92034e+06
1774	P48723	Heat shock 70 kDa protein 13	HSPA13	52 kDa		✓	✓	8	8	7	7554971	26880390	53535740
1775	P35625	Metalloproteinase inhibitor 3	TIMP3	24 kDa		✓		8	7	7	1.54134e+06	3.32485e+07	61374270
1776	Q92783	Signal transducing adapter molecule 1	STAM	59 kDa				8	7	7	188988	249338	3.06531e+06
1777	P52788	Spermine synthase	SMS	41 kDa			✓	8	7	7	5.48007e+06	7.40778e+06	10126894
1778	P22692	Insulin-like growth factor-binding protein 4	IGFBP4	28 kDa		✓		7	8	7	8369611	1.75665e+07	16123890
1779	P53634	Dipeptidyl peptidase 1	CTSC	52 kDa		✓	✓	7	7	7	2245550	2.02029e+06	2015631
1780	O94907	Dickkopf-related protein 1	DKK1	29 kDa	✓	✓		7	7	7	1.22403e+07	2.11249e+07	2.30611e+07
1781	P69905	Hemoglobin subunit alpha	HBA1	15 kDa			✓	7	8	7	1.92487e+07	2.73107e+07	28914630
1782	P35590	Tyrosine-protein kinase receptor Tie-1	TIE1	125 kDa		✓		7	7	7	2.96046e+06	10325506	17814290
1783	P02794	Ferritin heavy chain	FTH1	21 kDa	✓		✓	7	7	7	6375788	1.21231e+07	5.20683e+06
1784	P21810	Biglycan	BGN	42 kDa		✓	✓	7	7	7	918883100	2.53084e+09	9.66755e+08
1785	Q9H497	Torsin-3A	TOR3A	46 kDa		✓	✓	7	8	7	15821730		589392
1786	Q9HB40	Retinoid-inducible serine carboxypeptidase	SCPEP1	51 kDa		✓	✓	7	7	7	1.09789e+06	2704854	3.05793e+06
1787	Q9UI42	Carboxypeptidase A4	CPA4	47 kDa		✓		7	7	7	1359362	1.43161e+06	1279059
1788	P04062	Lysosomal acid glucosylceramidase	GBA	60 kDa		✓	✓	7	8	7	1907305	4.12104e+07	67480880
1789	P23284	Peptidyl-prolyl cis-trans isomerase B	PPIB	24 kDa		✓	✓	7	7	7	9649823	1.78305e+07	17642010
1790	P27105	Erythrocyte band 7 integral membrane protein	STOM	32 kDa	✓		✓	7	7	7	35588680	4.88494e+07	44423160
1791	P46531	Neurogenic locus notch homolog protein 1	NOTCH1	272 kDa		✓		7	7	7	5.9718e+07	38549350	4.12478e+07
1792	P50502	Hsc70-interacting protein	ST13	41 kDa			✓	7	7	7	3.81819e+06	2405374	390232
1793	Q8NCH0	Carbohydrate sulfotransferase 14	CHST14	43 kDa			✓	7	7	7	4.30478e+06	6749783	30817320
1794	Q6UX71	Plexin domain-containing protein 2	PLXDC2	60 kDa		✓		7	0	7	6.19162e+06	1.57033e+07	5.94886e+06
1795	Q76M96	Coiled-coil domain-containing protein 80	CCDC80	108 kDa	✓	✓		7	8	7	4.51003e+06	2.02359e+07	2.67997e+07
1796	Q00688	Peptidyl-prolyl cis-trans isomerase FKBP3	FKBP3	25 kDa				6	7	7	15360150	3.90075e+07	33497630
1797	Q13162	Peroxiredoxin-4	PRDX4	31 kDa		✓	✓	6	8	7	2689128	1.57353e+07	4.00498e+07
1798	P08572	Collagen alpha-2(IV) chain	COL4A2	168 kDa		✓	✓	6	6	7	2.64854e+06	13745780	31810800
1799	O60513	Beta-1,4-galactosyltransferase 4	B4GALT4	40 kDa				6	7	7	4.45641e+07	262705900	5.51954e+08
1800	Q9H0B8	Cysteine-rich secretory protein LCCL domain-containing 2	CRISPLD2	56 kDa		✓	✓	6	8	7	6.355e+06	6.13476e+07	104026590
1801	P24593	Insulin-like growth factor-binding protein 5	IGFBP5	31 kDa	✓	✓		6	6	7	2.28333e+07	53757300	5.29858e+07
1802	Q9UQP3	Tenascin-N	TNN	144 kDa	✓	✓		6	6	7	1.51544e+06	4.99357e+06	3.13968e+06
1803	Q6P988	Palmitoleoyl-protein carboxylesterase NOTUM	NOTUM	56 kDa	✓	✓		6	8	7	6999185	1.49307e+07	1.86591e+07
1804	P25786	Proteasome subunit alpha type-1	PSMA1	30 kDa	✓		✓	6	7	7	816158	4.72354e+06	2.94452e+06
1805	P15848	Arylsulfatase B	ARSB	60 kDa		✓	✓	6	8	7	1.18586e+07	32629850	4.3257e+07
1806	Q9UBS4	DnaJ homolog subfamily B member 11	DNAJB11	41 kDa		✓		6	7	7	3.87529e+06	5543541	5904473
1807	Q9BQA1	Methylosome protein 50	WDR77	37 kDa				6	7	7	4.31138e+07	1.12866e+08	5.33085e+07
1808	Q562R1	Beta-actin-like protein 2	ACTBL2	42 kDa			✓	6	7	7	2.32038e+06	5.02602e+06	3.15617e+06
1809	Q8WXX5	DnaJ homolog subfamily C member 9	DNAJC9	30 kDa				6	7	7	54604.8	420356	140610
1810	P16333	Cytoplasmic protein NCK1	NCK1	43 kDa				6	10	7	8.20494e+06	12384490	10868280
1811	O14579	Coatomer subunit epsilon	COPE	34 kDa				5	7	7	845120	9.65483e+06	1.92644e+07
1812	P50897	Palmitoyl-protein thioesterase 1	PPT1	34 kDa		✓	✓	5	6	7	2.44319e+06	8.2676e+06	1.42004e+07
1813	Q15691	Microtubule-associated protein RP/EB family member 1	MAPRE1	30 kDa				5	7	7	1.63409e+06	8095962	2.38112e+07
1814	P29966	Myristoylated alanine-rich C-kinase substrate	MARCKS	32 kDa	✓		✓	5	7	7	998958	2.25861e+07	5.406e+07
1815	O75351	Vacuolar protein sorting-associated protein 4B	VPS4B	49 kDa			✓	5	6	7	2.07524e+06	2.14767e+06	1.10415e+06
1816	Q9UBQ6	Exostosin-like 2	EXTL2	37 kDa				5	7	7	479082	2.34827e+07	1.37431e+07
1817	P01889	HLA class I histocompatibility antigen, B alpha chain	HLA-B	40 kDa	✓	✓	✓	5	0	7	2.98362e+07	2.62598e+07	1.99994e+07
1818	P28062	Proteasome subunit beta type-8	PSMB8	30 kDa	✓		✓	5	8	7	1.29886e+06	1.65744e+07	29705640
1819	P19338	Nucleolin	NCL	77 kDa			✓	5	6	7	9.51562e+06	18443470	1.13158e+07
1820	Q13438	Protein OS-9	OS9	76 kDa	✓	✓		5	8	7	494038	1.03514e+07	2.01563e+07
1821	P36404	ADP-ribosylation factor-like protein 2	ARL2	21 kDa				5	7	7	2414695	8.91508e+06	24463200
1822	Q9H0C8	Integrin-linked kinase-associated serine/threonine phosphatase 2C	ILKAP	43 kDa				5	7	7	1432016000	6.06194e+06	4.61641e+06
1823	Q9NT62	Ubiquitin-like-conjugating enzyme ATG3	ATG3	36 kDa				5	7	7	751832	12853800	2.37644e+07
1824	P00966	Argininosuccinate synthase	ASS1	47 kDa	✓		✓	4	6	7	2205404	5.41327e+06	6.27483e+06
1825	Q96GG9	DCN1-like protein 1	DCUN1D1	30 kDa				4	5	7	2715514	4.63769e+06	4.74677e+06
1826	Q53EL6	Programmed cell death protein 4	PDCD4	52 kDa				4	9	7	343206	5.55122e+06	7212929
1827	P33316	Deoxyuridine 5'-triphosphate nucleotidohydrolase, mitochondrial	DUT	27 kDa	✓		✓	4	7	7	1308332	1.13377e+07	14331590
1828	Q99988	Growth/differentiation factor 15	GDF15	34 kDa	✓	✓	✓	4	5	7	3.77539e+06	20085820	3.18512e+07
1829	P33908	Mannosyl-oligosaccharide 1,2-alpha-mannosidase IA	MAN1A1	73 kDa	✓		✓	4	8	7	1.91762e+06	1.03662e+07	20246150
1830	Q8N584	Tetratricopeptide repeat protein 39C	TTC39C	66 kDa				4	6	7	1.54839e+06	3.8839e+06	5.5252e+06
1831	Q06265	Exosome complex component RRP45	EXOSC9	49 kDa	✓		✓	4	7	7	727208	1.24457e+07	1.82962e+07
1832	O75063	Glycosaminoglycan xylosylkinase	FAM20B	46 kDa		✓		4	7	7	379430		224350
1833	Q13443	Disintegrin and metalloproteinase domain-containing protein 9	ADAM9	91 kDa		✓	✓	4	6	7	968412	1.72209e+07	3.19427e+07
1834	Q99614	Tetratricopeptide repeat protein 1	TTC1	34 kDa	✓			4	6	7	1.07161e+06	1.4167e+07	18896080
1835	O75347	Tubulin-specific chaperone A	TBCA	13 kDa				4	2	7	155670	1.9586e+06	3.66647e+06
1836	Q8NCC3	Phospholipase A2 group XV	PLA2G15	47 kDa		✓	✓	4	7	7	587258	3365652	3.93232e+06
1837	P19838	Nuclear factor NF-kappa-B p105 subunit	NFKB1	105 kDa				4	6	7	792384	7.65508e+06	1.03105e+07
1838	Q9UQ53	Alpha-1,3-mannosyl-glycoprotein 4-beta-N-acetylglucosaminyltransferase B	MGAT4B	63 kDa				4	7	7	Missing Value	3165218	6.03678e+06
1839	Q96MW1	Coiled-coil domain-containing protein 43	CCDC43	25 kDa				4	7	7	298390	1.39133e+06	5.21596e+06
1840	P32322	Pyrroline-5-carboxylate reductase 1, mitochondrial	PYCR1	33 kDa				4	8	7	1.34061e+06	1.00553e+07	1.98665e+07
1841	Q99961	Endophilin-A2	SH3GL1	41 kDa				4	7	7	22225.9	686792	1.31913e+06
1842	Q14151	Scaffold attachment factor B2	SAFB2	107 kDa			✓	4	4	7	304701	9.52188e+06	1.49468e+07
1843	O00178	GTP-binding protein 1	GTPBP1	72 kDa				4	6	7	195037	9.35416e+06	1.89252e+07
1844	P16989	Y-box-binding protein 3	YBX3	40 kDa				3	4	7	306116	5.76993e+06	5.34209e+06
1845	Q8WTV0	Scavenger receptor class B member 1	SCARB1	61 kDa			✓	3	6	7	153889	1.01171e+06	2.70327e+06
1846	Q9BY43	Charged multivesicular body protein 4a	CHMP4A	25 kDa				3	7	7	29961.9	2078388	4.50774e+06
1847	P55210	Caspase-7	CASP7	34 kDa	✓			3	7	7	758555	2230493	2.59896e+06
1848	O15479	Melanoma-associated antigen B2	MAGEB2	35 kDa				3	7	7	474600	1.75501e+06	1759709
1849	P42765	3-ketoacyl-CoA thiolase, mitochondrial	ACAA2	42 kDa				3	6	7	745844	1.69827e+06	5.34815e+06
1850	P54802	Alpha-N-acetylglucosaminidase	NAGLU	82 kDa		✓	✓	3	8	7		2607066	5.67492e+06
1851	O43488	Aflatoxin B1 aldehyde reductase member 2	AKR7A2	40 kDa			✓	3	7	7		6421434	9.97228e+06
1852	O95400	CD2 antigen cytoplasmic tail-binding protein 2	CD2BP2	38 kDa	✓			3	7	7		6004349	11695440
1853	Q9NPF4	Probable tRNA N6-adenosine threonylcarbamoyltransferase	OSGEP	36 kDa				3	6	7		4.96942e+06	1.31092e+07
1854	O43615	Mitochondrial import inner membrane translocase subunit TIM44	TIMM44	51 kDa				3	8	7		2.55377e+08	476537
1855	Q5R372	Rab GTPase-activating protein 1-like	RABGAP1L	93 kDa				3	6	7		2.22759e+06	1.02661e+07
1856	Q96MX6	WD repeat-containing protein 92	WDR92	40 kDa				3	6	7		3.63139e+06	9883102
1857	Q6GMV2	SET and MYND domain-containing protein 5	SMYD5	47 kDa	✓			2	5	7		928557	2.73589e+06
1858	Q8N806	Putative E3 ubiquitin-protein ligase UBR7	UBR7	48 kDa				2	6	7		4.24151e+06	9.37857e+06
1859	Q9UKK9	ADP-sugar pyrophosphatase	NUDT5	24 kDa			✓	2	7	7		3.89903e+06	3.34577e+07
1860	Q9HB07	UPF0160 protein MYG1, mitochondrial	C12orf10	42 kDa				2	9	7		3026045	7.93774e+06
1861	Q9BY42	Replication termination factor 2	RTF2	34 kDa				2	5	7		8.11961e+06	1.72779e+07
1862	O14763	Tumor necrosis factor receptor superfamily member 10B	TNFRSF10B	48 kDa	✓	✓		2	6	7		1.24357e+07	15011980
1863	Q96P16	Regulation of nuclear pre-mRNA domain-containing protein 1A	RPRD1A	36 kDa				2	6	7		1.34476e+06	2608764
1864	Q6UN15	Pre-mRNA 3'-end-processing factor FIP1	FIP1L1	67 kDa				2	6	7		1619046	2.66186e+06
1865	Q9Y639	Neuroplastin	NPTN	44 kDa		✓		2	6	7		10832840	15987120
1866	Q15014	Mortality factor 4-like protein 2	MORF4L2	32 kDa				2	7	7		5.86318e+06	1.17973e+07
1867	A4D1P6	WD repeat-containing protein 91	WDR91	83 kDa				2	3	7		1.21799e+07	1.88487e+07
1868	Q13123	Protein Red	IK	66 kDa				2	6	7		9553590	12867430
1869	P42892	Endothelin-converting enzyme 1	ECE1	87 kDa			✓	2	4	7		1.33504e+06	2.86312e+06
1870	Q9NZQ3	NCK-interacting protein with SH3 domain	NCKIPSD	79 kDa				2	4	7		799239	1.98628e+06
1871	Q96C36	Pyrroline-5-carboxylate reductase 2	PYCR2	34 kDa				2	5	7		3.78425e+06	6.6599e+06
1872	Q9Y5Q8	General transcription factor 3C polypeptide 5	GTF3C5	60 kDa				2	6	7		2.8831e+06	4768137
1873	O94967	WD repeat-containing protein 47	WDR47	102 kDa				2	8	7		19951800	1.64907e+07
1874	Q10472	Polypeptide N-acetylgalactosaminyltransferase 1	GALNT1	64 kDa				2	4	7		2085076	3.79146e+06
1875	P04818	Thymidylate synthase	TYMS	36 kDa				1	7	7		5527054	1.44295e+07
1876	Q6UX04	Spliceosome-associated protein CWC27 homolog	CWC27	54 kDa				1	7	7		6.13057e+06	15899630
1877	Q9BQ75	Protein CMSS1	CMSS1	32 kDa				1	5	7		9652366	13075410
1878	Q86VX9	Vacuolar fusion protein MON1 homolog A	MON1A	73 kDa				1	3	7		621838	1930128
1879	Q3B726	DNA-directed RNA polymerase I subunit RPA43	TWISTNB	37 kDa				0	6	7		3.75708e+06	6.39384e+06
1880	O15541	E3 ubiquitin-protein ligase RNF113A	RNF113A	39 kDa				0	7	7		2.42444e+06	3.3603e+06
1881	Q9UKL0	REST corepressor 1	RCOR1	53 kDa				0	5	7		615520	851308
1882	Q5SSJ5	Heterochromatin protein 1-binding protein 3	HP1BP3	61 kDa				0	4	7		5.94775e+06	9.39721e+06
1883	Q9BW71	HIRA-interacting protein 3	HIRIP3	62 kDa				0	5	7		8.27429e+07	9.50882e+07
1884	Q9NX46	ADP-ribose glycohydrolase ARH3	ADPRS	39 kDa				0	6	7		665728	1.25623e+06
1885	Q8WTT2	Nucleolar complex protein 3 homolog	NOC3L	93 kDa				0	4	7		3.22677e+06	7.18068e+06
1886	O00746	Nucleoside diphosphate kinase, mitochondrial	NME4	21 kDa				0	5	7		2.95121e+06	4513198
1887	P46109	Crk-like protein	CRKL	34 kDa				0	6	7		4.30014e+07	3.84191e+07
1888	Q9NZ32	Actin-related protein 10	ACTR10	46 kDa				0	6	7		5.73292e+06	7620275
1889	Q16543	Hsp90 co-chaperone Cdc37	CDC37	44 kDa			✓	0	8	7		1492649	2.82029e+06
1890	P49770	Translation initiation factor eIF-2B subunit beta	EIF2B2	39 kDa				0	8	7		1136802	3104948
1891	Q9Y388	RNA-binding motif protein, X-linked 2	RBMX2	37 kDa				0	4	7		1.29614e+07	25295180
1892	Q9NZ63	Telomere length and silencing protein 1 homolog	C9orf78	34 kDa				0	3	7		5708274	1.16291e+07
1893	Q53F19	Nuclear cap-binding protein subunit 3	NCBP3	71 kDa				0	6	7		7.78356e+06	1.18508e+07
1894	Q9NWS0	PIH1 domain-containing protein 1	PIH1D1	32 kDa				0	5	7		1.56538e+06	3.55772e+06
1895	Q5F1R6	DnaJ homolog subfamily C member 21	DNAJC21	62 kDa				0	6	7		5.84983e+06	1.09921e+07
1896	P05362	Intercellular adhesion molecule 1	ICAM1	58 kDa		✓	✓	0	6	7		2.90305e+06	5.31006e+06
1897	P51116	Fragile X mental retardation syndrome-related protein 2	FXR2	74 kDa				0	5	7		14275960	16823230
1898	P53365	Arfaptin-2	ARFIP2	38 kDa				0	6	7		673076	1.28899e+06
1899	P25440	Bromodomain-containing protein 2	BRD2	88 kDa				0	7	7		4980246	9.59861e+06
1900	Q03167	Transforming growth factor beta receptor type 3	TGFBR3	94 kDa		✓	✓	0	5	7		1579769	2.45307e+06
1901	Q9NQ55	Suppressor of SWI4 1 homolog	PPAN	53 kDa				0	5	7		6155035	10841823
1902	P51148	Ras-related protein Rab-5C	RAB5C	23 kDa			✓	0	8	7		3.84113e+06	6.98406e+06
1903	Q9H0A0	RNA cytidine acetyltransferase	NAT10	116 kDa				0	3	7		4.10331e+06	3720041
1904	Q9UKT5	F-box only protein 4	FBXO4	44 kDa				0	6	7		5.62641e+06	9.08761e+06
1905	P51151	Ras-related protein Rab-9A	RAB9A	23 kDa			✓	0	6	7		1.74433e+06	2.00812e+06
1906	Q9GZT4	Serine racemase	SRR	37 kDa				0	3	7		8369592	1.89496e+07
1907	Q9NQ48	Leucine zipper transcription factor-like protein 1	LZTFL1	35 kDa				0	6	7		3.45864e+06	5.74304e+06
1908	Q9Y3X0	Coiled-coil domain-containing protein 9	CCDC9	60 kDa				0	5	7		3.89377e+06	8170616
1909	P53602	Diphosphomevalonate decarboxylase	MVD	43 kDa				0	6	7		3.82687e+06	7.90215e+06
1910	Q9H269	Vacuolar protein sorting-associated protein 16 homolog	VPS16	95 kDa				0	5	7		7.88255e+06	10288550
1911	O00625	Pirin	PIR	32 kDa				0	7	7		2142060	4.54664e+06
1912	P30085	UMP-CMP kinase	CMPK1	22 kDa			✓	0	7	7		9425618	1.9259e+07
1913	Q9NTX5	Ethylmalonyl-CoA decarboxylase	ECHDC1	34 kDa				0	6	7		2791927	3082527
1914	Q9NXR1	Nuclear distribution protein nudE homolog 1	NDE1	38 kDa				0	4	7		5.95927e+06	9481736
1915	Q9UK22	F-box only protein 2	FBXO2	33 kDa				0	6	7		1.57781e+06	2997976
1916	Q9BSL1	Ubiquitin-associated domain-containing protein 1	UBAC1	45 kDa			✓	0	7	7		8.95129e+06	1.1374e+07
1917	Q99567	Nuclear pore complex protein Nup88	NUP88	84 kDa				0	6	7		2.89963e+06	2935093
1918	P11802	Cyclin-dependent kinase 4	CDK4	34 kDa				0	6	7		1.50238e+06	3.18791e+06
1919	Q96RL1	BRCA1-A complex subunit RAP80	UIMC1	80 kDa				0	5	7		1.87783e+06	3.64362e+06
1920	Q13416	Origin recognition complex subunit 2	ORC2	66 kDa				0	6	7		9.53938e+06	18949510
1921	Q9UBP6	tRNA (guanine-N(7)-)-methyltransferase	METTL1	31 kDa				0	5	7		2.03798e+06	5.04163e+06
1922	Q5TAQ9	DDB1- and CUL4-associated factor 8	DCAF8	67 kDa				0	7	7		1953829	5.41486e+06
1923	Q96T88	E3 ubiquitin-protein ligase UHRF1	UHRF1	90 kDa				0	7	7		3.32132e+06	7.44928e+06
1924	Q9HA77	Probable cysteine--tRNA ligase, mitochondrial	CARS2	62 kDa				0	4	7		3756052	7.06823e+06
1925	Q96DB5	Regulator of microtubule dynamics protein 1	RMDN1	36 kDa				0	5	7		1.49391e+06	3.48409e+06
1926	P07099	Epoxide hydrolase 1	EPHX1	53 kDa				0	5	7		1.26823e+06	2838182
1927	Q9H0G5	Nuclear speckle splicing regulatory protein 1	NSRP1	66 kDa				0	5	7		807538	959846
1928	Q9BV44	THUMP domain-containing protein 3	THUMPD3	57 kDa				0	6	7		731668	1687566
1929	P53367	Arfaptin-1	ARFIP1	42 kDa				0	8	7		1.09741e+06	1488449
1930	Q9Y5X2	Sorting nexin-8	SNX8	53 kDa				0	7	7		7603952	1.03567e+07
1931	Q676U5	Autophagy-related protein 16-1	ATG16L1	68 kDa				0	5	7		1932396	3.05398e+06
1932	Q8NFF5	FAD synthase	FLAD1	65 kDa				0	6	7		2187162	4.22454e+06
1933	P57081	tRNA (guanine-N(7)-)-methyltransferase non-catalytic subunit WDR4	WDR4	45 kDa				0	6	7		4.42257e+06	5.62362e+06
1934	Q9NV06	DDB1- and CUL4-associated factor 13	DCAF13	51 kDa				0	5	7		347748	1898210
1935	Q5T8D3	Acyl-CoA-binding domain-containing protein 5	ACBD5	60 kDa				0	6	7		5.3417e+06	4.67218e+06
1936	P06744	Glucose-6-phosphate isomerase	GPI	63 kDa			✓	0	6	7		2.56989e+06	5.08659e+06
1937	P23497	Nuclear autoantigen Sp-100	SP100	100 kDa				0	8	7		381629	2272414
1938	Q9H270	Vacuolar protein sorting-associated protein 11 homolog	VPS11	108 kDa				0	3	7		2192688	5119993
1939	Q15058	Kinesin-like protein KIF14	KIF14	186 kDa				0	4	7		1.5655e+06	2.51626e+06
1940	Q92576	PHD finger protein 3	PHF3	229 kDa				0	3	7		3.61592e+06	6071300
1941	Q9BSJ8	Extended synaptotagmin-1	ESYT1	123 kDa				0	7	7		2985757	4.65689e+06
1942	Q9BZG1	Ras-related protein Rab-34	RAB34	29 kDa			✓	0	7	7		1.4941e+06	3.82503e+06
1943	O75376	Nuclear receptor corepressor 1	NCOR1	270 kDa				0	4	7		4.08083e+06	4.84357e+06
1944	Q96BN8	Ubiquitin thioesterase otulin	OTULIN	40 kDa				0	4	7		1.28398e+06	3.73574e+06
1945	Q8NFW8	N-acylneuraminate cytidylyltransferase	CMAS	48 kDa				0	6	7		3314690	8.15776e+06
1946	Q14331	Protein FRG1	FRG1	29 kDa				0	5	7		2294245	2.86075e+06
1947	Q04206	Transcription factor p65	RELA	60 kDa				0	8	7		7455024	1.27963e+07
1948	Q66LE6	Serine/threonine-protein phosphatase 2A 55 kDa regulatory subunit B delta isoform	PPP2R2D	52 kDa				0	6	7		2892056	3.44165e+06
1949	Q9Y217	Myotubularin-related protein 6	MTMR6	72 kDa				0	2	7		2694701	2.85973e+06
1950	Q0VDF9	Heat shock 70 kDa protein 14	HSPA14	55 kDa				0	4	7		5.55201e+06	1.19695e+07
1951	Q8IYI6	Exocyst complex component 8	EXOC8	82 kDa				0	5	7		653848	3.05835e+06
1952	P04183	Thymidine kinase, cytosolic	TK1	25 kDa				0	6	7		527516	1425995
1953	Q9BXK5	Bcl-2-like protein 13	BCL2L13	53 kDa				0	6	7		6.26563e+06	8.93873e+06
1954	P04920	Anion exchange protein 2	SLC4A2	137 kDa				0	4	7		2.17612e+06	7.16773e+06
1955	Q6I9Y2	THO complex subunit 7 homolog	THOC7	24 kDa				0	5	7		1.71799e+06	2.10583e+06
1956	Q96F44	E3 ubiquitin-protein ligase TRIM11	TRIM11	53 kDa				0	5	7		2.45243e+06	1.40746e+06
1957	Q96EB1	Elongator complex protein 4	ELP4	47 kDa				0	7	7		262306	1.85381e+06
1958	P61758	Prefoldin subunit 3	VBP1	23 kDa				0	7	7		1126562	2.67351e+06
1959	Q99959	Plakophilin-2	PKP2	97 kDa				0	4	7		614997	2.09631e+06
1960	Q08379	Golgin subfamily A member 2	GOLGA2	113 kDa				0	4	7		6287161	8.43434e+06
1961	Q9Y4P8	WD repeat domain phosphoinositide-interacting protein 2	WIPI2	49 kDa				0	4	7		3204459	2468209
1962	Q9BXW7	Haloacid dehalogenase-like hydrolase domain-containing 5	HDHD5	46 kDa		✓		0	4	7		420708	6011853
1963	Q92766	Ras-responsive element-binding protein 1	RREB1	181 kDa			✓	0	5	7		79377	213899
1964	Q9BPX3	Condensin complex subunit 3	NCAPG	114 kDa				0	5	7		499223	1.08329e+06
1965	P54278	Mismatch repair endonuclease PMS2	PMS2	96 kDa				0	4	7		507480	1.26482e+06
1966	Q7L5Y9	E3 ubiquitin-protein transferase MAEA	MAEA	45 kDa				0	4	7		1.23689e+07	604477
1967	P78332	RNA-binding protein 6	RBM6	129 kDa				0	2	7		1.00632e+06	2714304
1968	Q9Y6W5	Wiskott-Aldrich syndrome protein family member 2	WASF2	54 kDa			✓	0	6	7		997440	1.95523e+06
1969	Q96IY1	Kinetochore-associated protein NSL1 homolog	NSL1	32 kDa				0	4	7		364183	635633
1970	Q567U6	Coiled-coil domain-containing protein 93	CCDC93	73 kDa				0	8	7		1.18482e+06	1.84892e+06
1971	Q9UBX5	Fibulin-5	FBLN5	50 kDa		✓	✓	0	8	7		917614	978732
1972	Q9Y3Z3	Deoxynucleoside triphosphate triphosphohydrolase SAMHD1	SAMHD1	72 kDa				0	6	7		3.44561e+06	7.96807e+06
1973	O95466	Formin-like protein 1	FMNL1	122 kDa			✓	0	8	7		3.17191e+06	5.8327e+06
1974	P09960	Leukotriene A-4 hydrolase	LTA4H	69 kDa			✓	0	8	7		1.77943e+06	1.0375e+07
1975	P18887	DNA repair protein XRCC1	XRCC1	69 kDa				0	2	7		2.28389e+06	3070285
1976	P14649	Myosin light chain 6B	MYL6B	23 kDa			✓	0	5	7		2.37962e+06	5741162
1977	Q03188	Centromere protein C	CENPC	107 kDa				0	2	7		1.13528e+06	3.18324e+06
1978	Q86TP1	Exopolyphosphatase PRUNE1	PRUNE1	50 kDa				0	6	7		1.05061e+06	6.87498e+06
1979	Q8TEB1	DDB1- and CUL4-associated factor 11	DCAF11	62 kDa				0	7	7		1.2678e+06	926196
1980	Q9Y2Z4	Tyrosine--tRNA ligase, mitochondrial	YARS2	53 kDa				0	6	7		397423	1.13006e+06
1981	O14646	Chromodomain-helicase-DNA-binding protein 1	CHD1	197 kDa				0	7	7		211329	468329
1982	P50452	Serpin B8	SERPINB8	43 kDa			✓	0	5	7		128264	4.09495e+06
1983	P40939	Trifunctional enzyme subunit alpha, mitochondrial	HADHA	83 kDa				0	5	7		84006.9	324865
1984	O75128	Protein cordon-bleu	COBL	136 kDa				0	4	7		532938	608428
1985	P55084	Trifunctional enzyme subunit beta, mitochondrial	HADHB	51 kDa				0	2	7		Missing Value	1.80721e+06
1986	P26232	Catenin alpha-2	CTNNA2	105 kDa				0	9	7		150740	245169
1987	P42226	Signal transducer and activator of transcription 6	STAT6	94 kDa				0	5	7		164693	236540
1988	Q7Z569	BRCA1-associated protein	BRAP	67 kDa				0	2	7		561789	2923462
1989	Q8TB52	F-box only protein 30	FBXO30	82 kDa				0	4	7			1.37658e+07
1990	Q8IWB7	WD repeat and FYVE domain-containing protein 1	WDFY1	46 kDa				0	7	7			625352
1991	Q04446	1,4-alpha-glucan-branching enzyme	GBE1	80 kDa			✓	0	4	7			6932308
1992	Q9ULJ7	Ankyrin repeat domain-containing protein 50	ANKRD50	156 kDa				0	1	7			7.70802e+06
1993	Q14155	Rho guanine nucleotide exchange factor 7	ARHGEF7	90 kDa				0	7	7			1.32225e+06
1994	O14787	Transportin-2	TNPO2	101 kDa				0	7	7			5.32071e+06
1995	Q9UM54	Unconventional myosin-VI	MYO6	150 kDa			✓	0	4	7			1.78908e+06
1996	Q99829	Copine-1	CPNE1	59 kDa			✓	0	0	7			9055158
1997	P49137	MAP kinase-activated protein kinase 2	MAPKAPK2	46 kDa			✓	0	0	7			6.04842e+06
1998	Q9BZ23	Pantothenate kinase 2, mitochondrial	PANK2	63 kDa				0	10	7			1.34731e+06
[truncated: 2,181 more rows]
