# Supplementary material for: A Simple Method for In-Depth Proteome Analysis of Mammalian Cell Culture Conditioned Media Containing Fetal Bovine Serum
Source: Int J Mol Sci. 2021 Mar 4;22(5):2565. doi: 10.3390/ijms22052565 (PMC7961985; doi:10.3390/ijms22052565)
Supplement: Supplementary file 1 [file ijms-22-02565-s001.zip › Supplementary Table S4.xlsx]

## Sheet: All identified proteins
Supplementary Table 4. List of all human proteins observed in TNF stimulated and non-stimulated HeLa cells by albumin depletion. The results of simultaneously analyzing collected MS data for each treatment by the Scaffold DIA were used.
No	Uniprot Ac.	Protein name	Gene symbol	Molecular Weight	Identified # of Peptides	TNF non-stimulated Sup. 1 Intensity	TNF non-stimulated Sup. 2 Intensity	TNF non-stimulated Sup. 3 Intensity	TNF stimulated Sup. 1 Intensity	TNF stimulated Sup. 2 Intensity	TNF stimulated Sup. 3 Intensity	Fold change by intensity Ave. (stimulated/non-stimulated)	P-value
1	P58546	Myotrophin	MTPN	13 kDa	3	8274355	7086697	6718273	7778824	6821044	7285201	0.991202	0.912397
2	P35555	Fibrillin-1	FBN1	312 kDa	40	3100524	3692284	3232025	2015938	2053194	1357092	0.541278	0.00694973
3	P51665	26S proteasome non-ATPase regulatory subunit 7	PSMD7	37 kDa	10	199430800	206111500	219718400	229174600	204583300	219190300	1.04428	0.379141
4	O75554	WW domain-binding protein 4	WBP4	43 kDa	6	12778270	13352910	12292590	11416930	13833610	10732940	0.93649	0.484031
5	Q9Y5S9	RNA-binding protein 8A	RBM8A	20 kDa	4	136558800	161675700	172931500	152071200	166572900	141368800	0.976329	0.790867
6	Q15691	Microtubule-associated protein RP/EB family member 1	MAPRE1	30 kDa	8	7021738	14193800	12390400	11255170	11171950	11756620	1.01719	0.937022
7	P78509	Reelin	RELN	388 kDa	38	22094570	20699370	16536090	20739910	17530100	18581900	0.958232	0.694441
8	P67809	Y-box-binding protein 1	YBX1	36 kDa	9	42815250	31870080	38038970	36757320	40314350	27341560	0.926271	0.610233
9	P42285	Exosome RNA helicase MTR4	MTREX	118 kDa	20	33000380	43777610	58378570	61833860	64906940	51950130	1.3221	0.17838
10	Q07954	Prolow-density lipoprotein receptor-related protein 1	LRP1	505 kDa	82	198538600	152802900	162644300	164980300	135556100	155387700	0.887036	0.314348
11	Q8NC51	Plasminogen activator inhibitor 1 RNA-binding protein	SERBP1	45 kDa	16	188403200	218770000	262995100	196379200	205791700	234699400	0.950314	0.681228
12	P09651	Heterogeneous nuclear ribonucleoprotein A1	HNRNPA1	39 kDa	13	794760200	1087871000	1092798000	917748600	927833800	981790200	0.95024	0.668788
13	Q96GM5	SWI/SNF-related matrix-associated actin-dependent regulator of chromatin subfamily D member 1	SMARCD1	58 kDa	10	1083771	1912683	2587910	2753627	3585972	3007335	1.67377	0.0826738
14	P27694	Replication protein A 70 kDa DNA-binding subunit	RPA1	68 kDa	18	153503800	168633500	207986500	167372600	161832000	172367300	0.946141	0.619364
15	Q16531	DNA damage-binding protein 1	DDB1	127 kDa	33	756759300	796274800	962063800	854014300	896977800	874231700	1.04379	0.620992
16	Q8IUI8	Cytokine receptor-like factor 3	CRLF3	50 kDa	7	13828170	14159100	13227890	10621220	11313740	13938840	0.870403	0.214972
17	P49411	Elongation factor Tu, mitochondrial	TUFM	50 kDa	15	41138030	51366280	66225230	57709230	73851620	59345580	1.20272	0.301875
18	P43034	Platelet-activating factor acetylhydrolase IB subunit alpha	PAFAH1B1	47 kDa	17	66334170	70291740	72267410	80968600	76857190	70890860	1.0949	0.140287
19	Q16719	Kynureninase	KYNU	52 kDa	19	203642500	208544000	257308300	236803300	246631100	208624100	1.0337	0.735772
20	Q9NYF8	Bcl-2-associated transcription factor 1	BCLAF1	106 kDa	13	27244560	30384210	33313170	25859750	36610990	34256260	1.06361	0.637878
21	P05455	Lupus La protein	SSB	47 kDa	20	171467700	176936000	212079200	192247700	205681000	190639700	1.05011	0.548218
22	Q15436	Protein transport protein Sec23A	SEC23A	86 kDa	20	109794100	114465800	142089900	138478200	137697000	143189000	1.14471	0.219108
23	P22692	Insulin-like growth factor-binding protein 4	IGFBP4	28 kDa	7	2304861	2523550	2422427	1459696	1622710	1838277	0.678636	0.00721105
24	P42167	Lamina-associated polypeptide 2, isoforms beta/gamma	TMPO	51 kDa	14	7876784	7927897	8816685	9192593	8316425	7516459	1.01641	0.827465
25	Q92499	ATP-dependent RNA helicase DDX1	DDX1	82 kDa	25	181024400	195416500	232074900	218269000	250846700	241562700	1.16789	0.144434
26	P61201	COP9 signalosome complex subunit 2	COPS2	52 kDa	14	92016810	83507090	109129200	90732870	114103900	96109150	1.05724	0.626963
27	P23381	Tryptophan--tRNA ligase, cytoplasmic	WARS1	53 kDa	12	139163100	135465700	145698800	153152900	152079200	167364500	1.12435	0.0500992
28	O94979	Protein transport protein Sec31A	SEC31A	133 kDa	21	12352370	13067910	16077400	13620060	13535370	13953610	0.990635	0.920262
29	O15143	Actin-related protein 2/3 complex subunit 1B	ARPC1B	41 kDa	7	7761403	8812582	11442310	10056310	11651130	9689437	1.12066	0.43144
30	Q08211	ATP-dependent RNA helicase A	DHX9	141 kDa	34	310318700	345961800	484762200	419073000	469731000	442930500	1.16712	0.354984
31	P00491	Purine nucleoside phosphorylase	PNP	32 kDa	13	68978330	94667950	106597300	109740100	111354800	103956900	1.20281	0.238658
32	O00468	Agrin	AGRN	217 kDa	30	103297900	90462300	78519160	89037610	85549340	87724030	0.963389	0.689246
33	P52209	6-phosphogluconate dehydrogenase, decarboxylating	PGD	53 kDa	14	8810096	11139630	11553880	15569990	16777750	14656730	1.49203	0.0101748
34	P30041	Peroxiredoxin-6	PRDX6	25 kDa	13	300723600	383596600	424098000	331812800	371390600	344373100	0.945109	0.639935
35	P21333	Filamin-A	FLNA	281 kDa	82	390659000	412456700	483478000	435148600	480860600	438530900	1.05281	0.525491
36	P49773	Histidine triad nucleotide-binding protein 1	HINT1	14 kDa	4	30951050	37511950	33760470	34986380	33384790	32734850	0.989069	0.867337
37	Q9GZP4	PITH domain-containing protein 1	PITHD1	24 kDa	8	10472000	15027770	13199630	9987184	8541465	12000890	0.788889	0.181583
38	Q9H6X2	Anthrax toxin receptor 1	ANTXR1	63 kDa	8	42231180	39925570	35606350	38669830	36537350	35390430	0.939153	0.352619
39	Q9UHD1	Cysteine and histidine-rich domain-containing protein 1	CHORDC1	37 kDa	12	86655400	90215220	94259610	88064880	94128480	84654300	0.984205	0.708063
40	Q12905	Interleukin enhancer-binding factor 2	ILF2	43 kDa	10	603496700	614632100	771825100	665768500	738388900	692422400	1.05358	0.591514
41	Q96DX5	Ankyrin repeat and SOCS box protein 9	ASB9	32 kDa	3	3434186	3575177	3871529	3560413	4052867	4455087	1.10913	0.266217
42	P02786	Transferrin receptor protein 1	TFRC	85 kDa	21	83962180	85787690	170029000	146401200	103359600	141322500	1.15099	0.626201
43	Q15149	Plectin	PLEC	532 kDa	129	157697400	200187300	254017300	233275100	280500200	230553100	1.21642	0.258802
44	P62191	26S proteasome regulatory subunit 4	PSMC1	49 kDa	15	145825200	145432200	146290900	157697400	155642800	153539200	1.06704	0.012047
45	P30153	Serine/threonine-protein phosphatase 2A 65 kDa regulatory subunit A alpha isoform	PPP2R1A	65 kDa	20	34303350	44800540	70086280	63704290	56906920	57805240	1.1959	0.457204
46	Q9UBQ5	Eukaryotic translation initiation factor 3 subunit K	EIF3K	25 kDa	6	57748710	66588040	63104910	67670000	74074130	81575110	1.19141	0.0772318
47	Q86VP6	Cullin-associated NEDD8-dissociated protein 1	CAND1	136 kDa	30	208470300	224902100	254075900	276546200	290492400	288597700	1.24466	0.0413002
48	O60610	Protein diaphanous homolog 1	DIAPH1	141 kDa	31	40666360	46530880	56029700	51120470	57296010	55016420	1.14108	0.268885
49	O43813	Glutathione S-transferase LANCL1	LANCL1	45 kDa	9	27171370	22354930	29882020	25773640	33457220	31118630	1.13778	0.313401
50	Q14624	Inter-alpha-trypsin inhibitor heavy chain H4	ITIH4	103 kDa	6	1247846000	1068682000	1048625000	957404200	911936800	1050884000	0.867784	0.13245
51	P51858	Hepatoma-derived growth factor	HDGF	27 kDa	14	334801200	415949400	433567100	384735400	374584000	380629600	0.962536	0.675415
52	P11047	Laminin subunit gamma-1	LAMC1	178 kDa	25	14003960	9752837	8701340	9853615	8978350	8940114	0.855628	0.437817
53	Q8NBP7	Proprotein convertase subtilisin/kexin type 9	PCSK9	74 kDa	12	36973870	30932950	28800830	23986020	27204060	28779430	0.82692	0.137092
54	Q15637	Splicing factor 1	SF1	68 kDa	9	41515820	43849090	43388860	39937630	41221990	40974940	0.94859	0.0703942
55	Q01105	Protein SET	SET	33 kDa	9	146968700	163980200	82859010	177536500	193346300	202302700	1.4555	0.127235
56	Q86YZ3	Hornerin	HRNR	282 kDa	4	3311842	4053721	434588	525751	1821457	662201	0.385814	0.282911
57	Q92945	Far upstream element-binding protein 2	KHSRP	73 kDa	13	67116890	78878450	83941260	72973850	67974490	69176890	0.91384	0.315241
58	P02774	Vitamin D-binding protein	GC	53 kDa	4	70254550	71544480	91951670	120055700	89158430	108510100	1.35924	0.0742834
59	O75369	Filamin-B	FLNB	278 kDa	82	287888100	315492500	386818500	299834800	359323600	348157500	1.01729	0.878752
60	Q15046	Lysine--tRNA ligase	KARS1	68 kDa	15	87963220	94848770	128940300	127792200	158696100	139945500	1.36786	0.0765113
61	P27708	CAD protein	CAD	243 kDa	18	1905993	2188596	2429624	1896414	2897451	2609606	1.13477	0.445181
62	Q14651	Plastin-1	PLS1	70 kDa	20	5738018	5761470	4568136	5374725	5394252	4961532	0.979019	0.808829
63	P23588	Eukaryotic translation initiation factor 4B	EIF4B	69 kDa	9	107689200	109851700	110266700	91964600	111778900	103449300	0.937113	0.353901
64	Q13813	Spectrin alpha chain, non-erythrocytic 1	SPTAN1	285 kDa	95	93218470	96280670	103904000	105592700	99113940	117743800	1.099	0.216915
65	P34897	Serine hydroxymethyltransferase, mitochondrial	SHMT2	56 kDa	13	81190970	100339600	130719000	122468400	112379400	123197000	1.14666	0.40186
66	O75131	Copine-3	CPNE3	60 kDa	9	20785500	21249170	24194840	27132350	23177950	23278110	1.11111	0.221463
67	P35606	Coatomer subunit beta'	COPB2	102 kDa	23	158642500	166565200	191011400	190252400	210128500	185169500	1.13431	0.139131
68	P48059	LIM and senescent cell antigen-like-containing domain protein 1	LIMS1	37 kDa	11	220663200	174773100	194784600	195936900	199433500	195453900	1.00102	0.98932
69	Q16555	Dihydropyrimidinase-related protein 2	DPYSL2	62 kDa	19	47906730	43419600	51165220	57163990	50218400	57374890	1.15626	0.0846539
70	P28482	Mitogen-activated protein kinase 1	MAPK1	41 kDa	13	79156240	66020350	80600500	69246580	78920980	82185900	1.02027	0.813727
71	Q9Y3F4	Serine-threonine kinase receptor-associated protein	STRAP	38 kDa	14	169162100	180473100	181293700	184896500	210131700	209147000	1.13796	0.0795504
72	P00746	Complement factor D	CFD	27 kDa	9	34194750	30849040	28619850	28374490	29367490	25085990	0.884313	0.159948
73	Q15459	Splicing factor 3A subunit 1	SF3A1	89 kDa	18	371406900	416697200	440588800	412910700	391418900	423398200	0.999215	0.989479
74	Q9NTK5	Obg-like ATPase 1	OLA1	45 kDa	18	35766490	43793380	47621500	42447300	50533450	39777410	1.04385	0.716161
75	Q06124	Tyrosine-protein phosphatase non-receptor type 11	PTPN11	68 kDa	23	6609716	6862111	7365226	5739933	6563447	6410191	0.898091	0.104421
76	Q16881	Thioredoxin reductase 1, cytoplasmic	TXNRD1	71 kDa	18	792881100	858415800	925365600	972179000	939214900	959559400	1.11421	0.116723
77	P59998	Actin-related protein 2/3 complex subunit 4	ARPC4	20 kDa	9	518144400	490336900	601756600	527976100	601220300	519598300	1.02394	0.777529
78	Q53RD9	Fibulin-7	FBLN7	47 kDa	3	9763273	11187280	7481113	7423216	6423556	7828554	0.762366	0.161413
79	P67775	Serine/threonine-protein phosphatase 2A catalytic subunit alpha isoform	PPP2CA	36 kDa	10	99259220	110138400	133780700	118469000	127764400	116098100	1.05581	0.603686
80	P38159	RNA-binding motif protein, X chromosome	RBMX	42 kDa	5	144673500	164040300	178239200	168432200	172234900	165626800	1.03972	0.578015
81	P02787	Serotransferrin	TF	77 kDa	43	22235160000	21871570000	19147460000	19790310000	18506670000	20499210000	0.929522	0.275019
82	Q9UQ80	Proliferation-associated protein 2G4	PA2G4	44 kDa	12	657305300	740265700	856864000	825974100	884190000	810634200	1.11815	0.261499
83	Q9NX24	H/ACA ribonucleoprotein complex subunit 2	NHP2	17 kDa	3	29315950	37244450	37734640	36705140	34049980	34595080	1.01012	0.91142
84	O95757	Heat shock 70 kDa protein 4L	HSPA4L	95 kDa	24	94570710	123535600	125786500	124295300	139409300	122040200	1.1217	0.307494
85	O43175	D-3-phosphoglycerate dehydrogenase	PHGDH	57 kDa	14	93249690	80309430	120597400	109137600	113513900	133045300	1.20921	0.229309
86	Q8TDN6	Ribosome biogenesis protein BRX1 homolog	BRIX1	41 kDa	10	32977340	32444230	37827190	41452280	42381310	39367950	1.19325	0.0408838
87	O43660	Pleiotropic regulator 1	PLRG1	57 kDa	16	41615450	42885680	48175960	43085840	46181730	44691870	1.00967	0.859268
88	P01857	Immunoglobulin heavy constant gamma 1	IGHG1	36 kDa	10	62648310	52785560	50984370	38337930	38769530	53431630	0.784404	0.129982
89	P12956	X-ray repair cross-complementing protein 6	XRCC6	70 kDa	22	628185700	690832300	825341400	699624200	770687000	764526100	1.04219	0.66685
90	P62244	40S ribosomal protein S15a	RPS15A	15 kDa	4	88491650	83897490	143000700	104095600	112085900	114100200	1.04722	0.819343
91	O75351	Vacuolar protein sorting-associated protein 4B	VPS4B	49 kDa	7	281717	587056	146661	466293	383454	353256	1.18472	0.683053
92	Q8NCA5	Protein FAM98A	FAM98A	55 kDa	9	14663040	16255040	17283730	10079450	19370270	12924010	0.87909	0.557789
93	Q9BQA1	Methylosome protein 50	WDR77	37 kDa	8	44223030	47295310	58854110	57885710	53461860	48279320	1.06154	0.593988
94	P28065	Proteasome subunit beta type-9	PSMB9	23 kDa	5	11249400	10100770	12457730	12133280	10425880	10380650	0.974323	0.762319
95	P31689	DnaJ homolog subfamily A member 1	DNAJA1	45 kDa	9	14696650	13661550	18638420	17070390	18653320	12384200	1.02365	0.885929
96	Q16576	Histone-binding protein RBBP7	RBBP7	48 kDa	12	51839990	54156510	60864120	61186210	61644740	59293220	1.09147	0.194994
97	Q3B726	DNA-directed RNA polymerase I subunit RPA43	TWISTNB	37 kDa	5	4583620	5124230	5539720	4555074	4984442	5196799	0.96647	0.641101
98	O43324	Eukaryotic translation elongation factor 1 epsilon-1	EEF1E1	20 kDa	7	40604740	30460530	38146090	55983830	45733450	36347570	1.2642	0.230183
99	Q13162	Peroxiredoxin-4	PRDX4	31 kDa	8	5416728	6459527	9045048	7081571	5861712	7839606	0.993384	0.972231
100	Q8WYA6	Beta-catenin-like protein 1	CTNNBL1	65 kDa	10	11608370	14339790	13484920	13497280	15539640	14386720	1.1012	0.260188
101	Q9NRN7	L-aminoadipate-semialdehyde dehydrogenase-phosphopantetheinyl transferase	AASDHPPT	36 kDa	6	1024252	1357453	1592923	1272099	1606078	1348831	1.0635	0.6904
102	P49321	Nuclear autoantigenic sperm protein	NASP	85 kDa	22	271657700	321469800	301651500	254791600	234191800	303390700	0.885553	0.252976
103	Q15437	Protein transport protein Sec23B	SEC23B	86 kDa	16	23764200	25821790	31521240	33137520	31449440	33823510	1.21334	0.120804
104	Q14978	Nucleolar and coiled-body phosphoprotein 1	NOLC1	74 kDa	7	21698590	26361580	27338770	21479450	28279160	29711310	1.05399	0.684901
105	Q14839	Chromodomain-helicase-DNA-binding protein 4	CHD4	218 kDa	35	79538610	95985450	84783590	79254170	83114680	91542190	0.975427	0.743932
106	Q15061	WD repeat-containing protein 43	WDR43	75 kDa	11	26121000	25525280	25376670	33610390	36548140	30468830	1.30646	0.0442824
107	Q06323	Proteasome activator complex subunit 1	PSME1	29 kDa	11	17194360	23285700	22597120	22898300	19082440	22590860	1.02369	0.839698
108	P07858	Cathepsin B	CTSB	38 kDa	8	53696520	51649670	53989390	53489510	67176460	50762450	1.0759	0.51152
109	Q15019	Septin-2	SEPTIN2	41 kDa	8	41267100	44060810	51339610	48432650	52811590	59000530	1.17252	0.140996
110	P49327	Fatty acid synthase	FASN	273 kDa	72	434273200	466578100	699418400	682738300	724276300	684721700	1.30711	0.186085
111	Q96AE4	Far upstream element-binding protein 1	FUBP1	68 kDa	12	208765300	272608400	238184800	207035000	273457400	235117200	0.994512	0.962998
112	Q15393	Splicing factor 3B subunit 3	SF3B3	136 kDa	32	538421000	600220400	649568500	608442800	650069300	611659200	1.04583	0.496308
113	Q9NWU1	3-oxoacyl-[acyl-carrier-protein] synthase, mitochondrial	OXSM	49 kDa	5	3188079	3789586	5152002	4398208	3902230	4481466	1.05377	0.750057
114	P11388	DNA topoisomerase 2-alpha	TOP2A	174 kDa	32	62148590	66971580	73107940	73503370	69366280	83328680	1.11853	0.205014
115	Q06203	Amidophosphoribosyltransferase	PPAT	57 kDa	13	18322580	19145190	26200220	20800450	24570190	23481980	1.08143	0.576298
116	O14579	Coatomer subunit epsilon	COPE	34 kDa	8	65636200	87022190	80656540	81577890	79880550	74687200	1.01213	0.898418
117	P29401	Transketolase	TKT	68 kDa	17	1332670000	1305059000	1882605000	1641214000	1587163000	1502954000	1.04668	0.747042
118	Q8NDH3	Probable aminopeptidase NPEPL1	NPEPL1	56 kDa	8	14581610	14775680	18169650	16088300	16396880	18481020	1.07236	0.462055
119	P35613	Basigin	BSG	42 kDa	6	75098590	79905550	104479600	77964210	109444300	88998910	1.06522	0.68571
120	P43487	Ran-specific GTPase-activating protein	RANBP1	23 kDa	5	133625900	149307900	201258800	131590200	179076800	150914200	0.953301	0.777084
121	O95456	Proteasome assembly chaperone 1	PSMG1	33 kDa	8	49605780	50037220	65397670	58829050	55291470	60003400	1.05504	0.623926
122	Q96ST2	Protein IWS1 homolog	IWS1	92 kDa	15	4545986	8603076	3955382	3878013	4247098	5991373	0.825311	0.581043
123	Q7L5N1	COP9 signalosome complex subunit 6	COPS6	36 kDa	8	23995000	23408410	31934360	25833100	27315340	27279070	1.01374	0.907775
124	O43290	U4/U6.U5 tri-snRNP-associated protein 1	SART1	90 kDa	17	16310460	20843140	19060940	17435320	16544660	18066070	0.925847	0.406085
125	P61978	Heterogeneous nuclear ribonucleoprotein K	HNRNPK	51 kDa	17	1149335000	1285685000	1383122000	1177180000	1442690000	1357208000	1.04163	0.636336
126	P78346	Ribonuclease P protein subunit p30	RPP30	29 kDa	9	45886960	58015060	69268630	52570750	71906970	53986010	1.03057	0.857038
127	Q14152	Eukaryotic translation initiation factor 3 subunit A	EIF3A	167 kDa	38	226415000	241625900	237573100	287975400	295025200	280446600	1.22368	0.00108335
128	P23246	Splicing factor, proline- and glutamine-rich	SFPQ	76 kDa	15	444670100	460131400	552929900	488199900	527925100	520803400	1.05433	0.525169
129	Q09028	Histone-binding protein RBBP4	RBBP4	48 kDa	10	127353300	178261900	138602300	145007100	150836600	143805900	0.989717	0.93081
130	P31939	Bifunctional purine biosynthesis protein PURH	ATIC	65 kDa	25	160139400	182857400	234171200	203720800	228711600	208627300	1.1107	0.438794
131	P14868	Aspartate--tRNA ligase, cytoplasmic	DARS1	57 kDa	26	57722660	70274070	81427550	90385560	81825830	76096610	1.18567	0.195784
132	P35527	Keratin, type I cytoskeletal 9	KRT9	62 kDa	16	1233821000	908995800	141629100	147593600	401143800	149660100	0.305719	0.240162
133	Q6NZY4	Zinc finger CCHC domain-containing protein 8	ZCCHC8	79 kDa	12	9929497	9986427	11933700	10336550	11363010	13737840	1.11265	0.384935
134	O95816	BAG family molecular chaperone regulator 2	BAG2	24 kDa	10	66720940	76162890	76328230	80078920	79843190	78681670	1.08846	0.176623
135	Q08257	Quinone oxidoreductase	CRYZ	35 kDa	9	41513130	44978320	52035590	49617330	45535490	44077750	1.00508	0.950885
136	P18754	Regulator of chromosome condensation	RCC1	45 kDa	14	129107500	126748100	166658900	145015400	170236000	158533500	1.12135	0.329244
137	P46940	Ras GTPase-activating-like protein IQGAP1	IQGAP1	189 kDa	49	79776680	102341700	119659900	135677600	143937100	143066400	1.40063	0.0666664
138	O43242	26S proteasome non-ATPase regulatory subunit 3	PSMD3	61 kDa	17	8746186	10586230	12494430	13896390	13088140	12059400	1.22676	0.142701
139	O60841	Eukaryotic translation initiation factor 5B	EIF5B	139 kDa	34	29530780	33491440	27997130	30510370	32761530	35235920	1.08227	0.308431
140	P62633	Cellular nucleic acid-binding protein	CNBP	19 kDa	4	24448180	28621680	27555780	20693530	17583880	21669690	0.743524	0.0171917
141	Q9BXP5	Serrate RNA effector molecule homolog	SRRT	101 kDa	12	51444000	51081750	55679900	61247770	61674930	60069580	1.15667	0.0219089
142	Q16658	Fascin	FSCN1	55 kDa	15	178660900	223485300	288256300	216174100	223431300	213901800	0.94656	0.736775
143	Q96PZ0	Pseudouridylate synthase 7 homolog	PUS7	75 kDa	13	8517061	8574512	9658984	8734996	10802670	10756860	1.13248	0.222827
144	Q5D862	Filaggrin-2	FLG2	248 kDa	7	9621578	8483555	23382700	2645035	5115887	3662269	0.275338	0.168809
145	P01375	Tumor necrosis factor	TNF	26 kDa	3	206072	583078	195124	45625720	40087440	30962850	118.54	0.0120092
146	O15371	Eukaryotic translation initiation factor 3 subunit D	EIF3D	64 kDa	13	110312900	121603900	100001800	137813800	156892600	155750500	1.35713	0.0108209
147	P31327	Carbamoyl-phosphate synthase [ammonia], mitochondrial	CPS1	165 kDa	50	1352490000	1551658000	2252941000	2203441000	2237490000	2223452000	1.29228	0.207012
148	O75083	WD repeat-containing protein 1	WDR1	66 kDa	16	166631400	154106000	181221700	155583400	158815700	186759700	0.998406	0.984202
149	P20618	Proteasome subunit beta type-1	PSMB1	26 kDa	10	671637700	692240000	743476600	730990300	643851100	639111000	0.955678	0.448876
150	Q99613	Eukaryotic translation initiation factor 3 subunit C	EIF3C	105 kDa	24	145010300	159917700	184959400	207416800	222397900	210920400	1.30792	0.0361916
151	O15541	E3 ubiquitin-protein ligase RNF113A	RNF113A	39 kDa	7	8427222	8855677	10562540	8871715	8853946	9047442	0.96149	0.639199
152	Q6P2Q9	Pre-mRNA-processing-splicing factor 8	PRPF8	274 kDa	37	42087220	55030200	66549960	79165980	69850980	76810110	1.37979	0.0840408
153	Q14676	Mediator of DNA damage checkpoint protein 1	MDC1	227 kDa	16	19442900	22488880	24409770	23474840	27151570	23917330	1.12364	0.2174
154	Q9NZV1	Cysteine-rich motor neuron 1 protein	CRIM1	114 kDa	9	20491400	18880850	17608190	15750820	15227420	16202550	0.828017	0.0476239
155	O14786	Neuropilin-1	NRP1	103 kDa	16	4898827	2956611	2086782	3744451	2156970	2889293	0.88418	0.712162
156	P05156	Complement factor I	CFI	66 kDa	17	256150900	196682600	160167200	173868900	166159700	181319600	0.850485	0.388867
157	Q13616	Cullin-1	CUL1	90 kDa	20	17333480	19525500	24630560	27435150	27871750	29289310	1.37578	0.0624246
158	O43707	Alpha-actinin-4	ACTN4	105 kDa	47	465211300	450897200	618025100	614418900	554051700	551187800	1.12093	0.371009
159	O60832	H/ACA ribonucleoprotein complex subunit DKC1	DKC1	58 kDa	17	71792660	77352180	92822500	81978170	87784250	88661650	1.06801	0.481233
160	Q01082	Spectrin beta chain, non-erythrocytic 1	SPTBN1	275 kDa	86	44510530	47669890	52986290	54146170	58467090	50580410	1.12418	0.149045
161	P13639	Elongation factor 2	EEF2	95 kDa	34	52181660	61772790	104935800	102507700	117136000	72391620	1.33416	0.31067
162	Q01970	1-phosphatidylinositol 4,5-bisphosphate phosphodiesterase beta-3	PLCB3	139 kDa	30	87029840	97000710	102233000	92104550	100239200	95274090	1.00473	0.93431
163	O15067	Phosphoribosylformylglycinamidine synthase	PFAS	145 kDa	21	29162590	34452330	43288120	37172350	41885540	36390090	1.07993	0.573796
164	Q02878	60S ribosomal protein L6	RPL6	33 kDa	9	35739090	39043560	52005150	41908680	45133310	34513020	0.958728	0.783882
165	P35244	Replication protein A 14 kDa subunit	RPA3	14 kDa	6	96584120	119983300	126060600	110266900	118937400	120814500	1.02157	0.816154
166	Q13263	Transcription intermediary factor 1-beta	TRIM28	89 kDa	11	49539870	49702720	49779830	43632500	49195680	50996350	0.96512	0.516254
167	O00154	Cytosolic acyl coenzyme A thioester hydrolase	ACOT7	42 kDa	9	2193337	2369294	2469820	2206470	2698763	2855808	1.1036	0.343709
168	Q9BXS5	AP-1 complex subunit mu-1	AP1M1	49 kDa	15	117719800	121462700	156880900	139410300	144238000	137317200	1.06287	0.575909
169	P49407	Beta-arrestin-1	ARRB1	47 kDa	11	71553280	78128740	64005980	64288120	66889200	67589210	0.930172	0.346826
170	O43681	ATPase GET3	GET3	39 kDa	6	89664400	93222260	93700960	103088300	107028600	101680000	1.1273	0.00530529
171	P11586	C-1-tetrahydrofolate synthase, cytoplasmic	MTHFD1	102 kDa	28	204186100	189239100	265083500	252022200	265614900	239483300	1.14975	0.290105
172	Q15287	RNA-binding protein with serine-rich domain 1	RNPS1	34 kDa	3	6945033	8709302	8649314	10139910	10582440	9364717	1.23797	0.0582496
173	O95831	Apoptosis-inducing factor 1, mitochondrial	AIFM1	67 kDa	15	123159400	138519800	163690900	140968900	146725900	136481200	0.997193	0.976602
174	P26599	Polypyrimidine tract-binding protein 1	PTBP1	57 kDa	12	46374360	56275270	51688810	50367330	59140490	53801920	1.05813	0.479489
175	Q9Y5B9	FACT complex subunit SPT16	SUPT16H	120 kDa	29	201383900	213886300	176234500	266207600	286718400	264532900	1.382	0.00737592
176	Q9H7Z7	Prostaglandin E synthase 2	PTGES2	42 kDa	10	32298610	28288200	44360990	29152570	33112460	42820230	1.00131	0.994564
177	Q9Y5K6	CD2-associated protein	CD2AP	71 kDa	21	54851580	59700580	67753790	56782100	60616570	56138020	0.951898	0.527721
178	Q92820	Gamma-glutamyl hydrolase	GGH	36 kDa	9	92780010	82486210	87606990	90832040	92849110	88352230	1.03485	0.421921
179	Q14697	Neutral alpha-glucosidase AB	GANAB	107 kDa	23	59895050	60054480	97806220	85916730	67042720	85935030	1.09708	0.652152
180	Q9P258	Protein RCC2	RCC2	56 kDa	13	36116760	32810380	54505360	47454110	49470730	42439000	1.12907	0.519531
181	P23468	Receptor-type tyrosine-protein phosphatase delta	PTPRD	215 kDa	32	101244200	82792890	81115770	87104310	69011890	66220140	0.838521	0.195334
182	Q9P2J5	Leucine--tRNA ligase, cytoplasmic	LARS1	134 kDa	33	95986610	97877440	133492800	135088700	154158400	145583700	1.32831	0.0815621
183	P17931	Galectin-3	LGALS3	26 kDa	5	27626060	28125950	35866730	25199420	22108590	25571680	0.795467	0.130447
184	P51808	Dynein light chain Tctex-type 3	DYNLT3	13 kDa	2	349699	581539	607881	769119	773374	747202	1.48767	0.0913598
185	Q32MZ4	Leucine-rich repeat flightless-interacting protein 1	LRRFIP1	89 kDa	17	25098030	30663540	28953270	27966500	29230710	28827620	1.01546	0.818014
186	P04083	Annexin A1	ANXA1	39 kDa	13	357449000	387133800	663009700	352933000	395548200	371969300	0.796005	0.429224
187	Q12906	Interleukin enhancer-binding factor 3	ILF3	95 kDa	27	146191100	175902800	179046900	170724200	187162900	177960400	1.06926	0.393391
188	P20908	Collagen alpha-1(V) chain	COL5A1	184 kDa	6	140162600	138240900	117655700	90876430	110059800	130452900	0.836716	0.198733
189	Q9UGI8	Testin	TES	48 kDa	14	6038116	6959017	7747398	8534238	8335082	9205168	1.25693	0.0491509
190	P40926	Malate dehydrogenase, mitochondrial	MDH2	36 kDa	13	45349980	35665790	60240240	55458430	43619710	56071740	1.09836	0.610435
191	O00499	Myc box-dependent-interacting protein 1	BIN1	65 kDa	11	8308083	11885160	10709940	11075210	11361390	10101890	1.05292	0.665535
192	P07814	Bifunctional glutamate/proline--tRNA ligase	EPRS1	171 kDa	49	169198100	195255700	255175700	270723900	267622500	261574800	1.29097	0.14063
193	P07900	Heat shock protein HSP 90-alpha	HSP90AA1	85 kDa	34	1746672000	2164866000	2149797000	2134003000	2430371000	2350584000	1.14083	0.167921
194	P07384	Calpain-1 catalytic subunit	CAPN1	82 kDa	21	40796410	45732450	50247140	44574650	46422650	44057520	0.987416	0.855653
195	P47897	Glutamine--tRNA ligase	QARS1	88 kDa	23	40037950	41030270	56472590	49260050	58526120	49450200	1.1432	0.358847
196	P07195	L-lactate dehydrogenase B chain	LDHB	37 kDa	10	72262180	87977130	101079600	110200800	103718200	104976600	1.22033	0.141288
197	O76094	Signal recognition particle subunit SRP72	SRP72	75 kDa	16	44965430	45282660	60521600	54361270	53395160	56622160	1.09026	0.47141
198	P08195	4F2 cell-surface antigen heavy chain	SLC3A2	68 kDa	16	219489900	211898600	379899700	373704100	316420900	377146000	1.31553	0.255694
199	P28062	Proteasome subunit beta type-8	PSMB8	30 kDa	8	61446140	70922930	77211750	70035590	60908780	78059030	0.997245	0.97862
200	Q15042	Rab3 GTPase-activating protein catalytic subunit	RAB3GAP1	111 kDa	22	10688420	12623740	14524230	11841720	12667170	12378660	0.974923	0.804376
201	Q9BQ61	Telomerase RNA component interacting RNase	TRIR	18 kDa	4	12514510	18040890	16158560	14922370	15172780	14896730	0.963136	0.757419
202	P07996	Thrombospondin-1	THBS1	129 kDa	42	287698500	270955200	224924400	205255600	267946500	224673100	0.890626	0.339651
203	Q92599	Septin-8	SEPTIN8	56 kDa	10	79114540	83356680	87710160	79188670	77531760	78119050	0.938677	0.171343
204	Q99598	Translin-associated protein X	TSNAX	33 kDa	12	12812010	12090250	12619850	14486960	14751510	11261260	1.07936	0.471089
205	O43390	Heterogeneous nuclear ribonucleoprotein R	HNRNPR	71 kDa	21	375783600	401854400	493382700	475480400	528479500	450242200	1.14412	0.235167
206	Q2TAY7	WD40 repeat-containing protein SMU1	SMU1	58 kDa	15	46132010	46582610	53471130	53570500	57057390	56205120	1.14124	0.0842633
207	P35270	Sepiapterin reductase	SPR	28 kDa	9	12962000	12374150	16359660	15989800	18754110	14513810	1.18136	0.224735
208	O75153	Clustered mitochondria protein homolog	CLUH	147 kDa	19	3618280	4362589	5728538	5523540	5233370	4998911	1.14927	0.385461
209	Q8TAQ2	SWI/SNF complex subunit SMARCC2	SMARCC2	133 kDa	29	23378180	20613430	27660030	21389130	25902580	23992870	0.994877	0.962685
210	Q9NPE3	H/ACA ribonucleoprotein complex subunit 3	NOP10	8 kDa	2	5331402	4757373	6261255	6598397	4402498	4817368	0.967476	0.837881
211	P40227	T-complex protein 1 subunit zeta	CCT6A	58 kDa	15	129390500	178412700	210083300	240473000	228491200	267799500	1.42264	0.0706716
212	P29692	Elongation factor 1-delta	EEF1D	31 kDa	12	831163200	1026487000	1031315000	1098211000	1096803000	1054317000	1.12474	0.205959
213	Q8WW12	PEST proteolytic signal-containing nuclear protein	PCNP	19 kDa	5	36602470	51206690	42353030	34881290	34279440	41739870	0.852019	0.27537
214	P39748	Flap endonuclease 1	FEN1	43 kDa	5	67169160	68087580	63651790	73704840	80927540	81411730	1.1867	0.0209982
215	P46109	Crk-like protein	CRKL	34 kDa	7	17754450	22873920	26258360	21564640	23340120	22476930	1.0074	0.953415
216	Q13409	Cytoplasmic dynein 1 intermediate chain 2	DYNC1I2	71 kDa	10	30488140	42683260	39136780	19471040	28014350	42941660	0.805169	0.415661
217	O94973	AP-2 complex subunit alpha-2	AP2A2	104 kDa	23	11091020	12515660	16857870	18391900	19510370	18785560	1.40093	0.084495
218	Q9NQX3	Gephyrin	GPHN	80 kDa	14	28330440	31223020	30316430	26590180	28630790	27071650	0.915686	0.0809001
219	P11413	Glucose-6-phosphate 1-dehydrogenase	G6PD	59 kDa	20	39148940	37488480	56693640	50601410	59650000	46015970	1.17203	0.364847
220	P07602	Prosaposin	PSAP	58 kDa	13	248075400	268640500	261836300	253831100	284616400	271879700	1.04081	0.388776
221	Q14677	Clathrin interactor 1	CLINT1	68 kDa	9	28725980	29112460	29608500	28931280	28948120	27348110	0.97462	0.301229
222	Q92841	Probable ATP-dependent RNA helicase DDX17	DDX17	80 kDa	24	257295900	248653000	333477500	328547200	396706000	299687300	1.221	0.192055
223	Q9UBT2	SUMO-activating enzyme subunit 2	UBA2	71 kDa	10	74758740	76905890	86199440	77023860	85998180	85667770	1.04551	0.475918
224	Q9Y2W1	Thyroid hormone receptor-associated protein 3	THRAP3	109 kDa	21	80062130	96034990	103085600	107568700	117886100	100433500	1.16729	0.146446
225	P31431	Syndecan-4	SDC4	22 kDa	4	42272750	34847530	32874060	56411920	51736960	56025830	1.49257	0.0110984
226	Q15020	Squamous cell carcinoma antigen recognized by T-cells 3	SART3	110 kDa	16	11357920	12826860	13217270	12853070	16486730	14389580	1.16917	0.173915
227	Q13268	Dehydrogenase/reductase SDR family member 2, mitochondrial	DHRS2	30 kDa	6	13568370	15057880	16157420	12551930	13329990	13368550	0.876446	0.121002
228	O14744	Protein arginine N-methyltransferase 5	PRMT5	73 kDa	13	16150010	19123990	23758220	19179880	17281340	19964680	0.955849	0.740822
229	P52292	Importin subunit alpha-1	KPNA2	58 kDa	12	77308030	81904570	92487300	94538730	99860440	85547360	1.11222	0.200035
230	O14980	Exportin-1	XPO1	123 kDa	32	4545611	5817446	7318070	8506949	7213796	7564037	1.31693	0.130279
231	Q13283	Ras GTPase-activating protein-binding protein 1	G3BP1	52 kDa	14	211988400	247121200	218603800	239194300	233375000	233915800	1.04245	0.468553
232	P30419	Glycylpeptide N-tetradecanoyltransferase 1	NMT1	57 kDa	11	66823280	68262140	92360650	75958040	84465180	78916130	1.05229	0.685549
233	Q9GZL7	Ribosome biogenesis protein WDR12	WDR12	48 kDa	10	63882690	93920870	84658950	82122130	83781040	90520220	1.05758	0.658287
234	Q9UKJ3	G patch domain-containing protein 8	GPATCH8	164 kDa	4	2708327	2205106	3664027	2345309	2738528	2164085	0.844996	0.415988
235	P11766	Alcohol dehydrogenase class-3	ADH5	40 kDa	4	8909561	10328380	10064330	18169590	12144340	10569750	1.39524	0.234836
236	O15042	U2 snRNP-associated SURP motif-containing protein	U2SURP	118 kDa	13	19566840	20125880	16718520	19862340	24166190	22226660	1.1745	0.116516
237	P08174	Complement decay-accelerating factor	CD55	41 kDa	6	92237830	79491120	108101700	95725490	86350810	98883180	1.00403	0.969763
238	Q9UNF0	Protein kinase C and casein kinase substrate in neurons protein 2	PACSIN2	56 kDa	9	50393710	54186490	53972970	56066810	54633940	52675840	1.03042	0.367545
239	P08697	Alpha-2-antiplasmin	SERPINF2	55 kDa	5	13745100	8155747	12531500	9763905	9898388	12536810	0.935141	0.724063
240	Q8WWI1	LIM domain only protein 7	LMO7	193 kDa	19	29305550	32180240	31557470	29517460	30501430	28184400	0.947982	0.221366
241	Q69YN2	CWF19-like protein 1	CWF19L1	61 kDa	10	18591920	21607160	23789210	20242730	23533420	22076740	1.02914	0.747923
242	Q14157	Ubiquitin-associated protein 2-like	UBAP2L	115 kDa	8	12116050	16827820	15871600	13421750	12680140	15050590	0.918265	0.502535
243	P53396	ATP-citrate synthase	ACLY	121 kDa	31	28346430	29486910	44374970	53513420	56389130	45968900	1.52504	0.0528712
244	P09874	Poly [ADP-ribose] polymerase 1	PARP1	113 kDa	33	596360500	676036800	811642400	713667000	749685100	761104000	1.06738	0.53695
245	P17844	Probable ATP-dependent RNA helicase DDX5	DDX5	69 kDa	20	98977250	101714800	124224400	126857800	141478400	119825500	1.19465	0.11181
246	P22234	Multifunctional protein ADE2	PAICS	47 kDa	13	78829440	84396760	112258300	126391800	124046900	125905600	1.36612	0.0823035
247	O00429	Dynamin-1-like protein	DNM1L	82 kDa	27	160075400	122038600	141494500	132884100	150181300	140844200	1.00071	0.993921
248	P62736	Actin, aortic smooth muscle	ACTA2	42 kDa	14	1405821000	1147925000	1086970000	710377300	966398100	1050499000	0.749104	0.0978581
249	Q08380	Galectin-3-binding protein	LGALS3BP	65 kDa	11	668847200	546332800	500533700	613343100	564740800	627066600	1.05213	0.623508
250	P25787	Proteasome subunit alpha type-2	PSMA2	26 kDa	7	403582400	340233000	423956400	437873700	416511500	375783600	1.05343	0.543616
251	P12643	Bone morphogenetic protein 2	BMP2	45 kDa	3	9207321	9837325	8809883	9415432	11283340	10269790	1.1118	0.187618
252	P19623	Spermidine synthase	SRM	34 kDa	11	7023018	7192489	8729071	8311331	9226396	7551590	1.09347	0.38191
253	Q8NI22	Multiple coagulation factor deficiency protein 2	MCFD2	16 kDa	1	77462.2	116338	252449	337551	164539	317605	1.83685	0.177579
254	P46087	Probable 28S rRNA (cytosine(4447)-C(5))-methyltransferase	NOP2	89 kDa	17	231258400	282532800	298572000	265660400	281629700	275662800	1.01304	0.87968
255	Q8NBS9	Thioredoxin domain-containing protein 5	TXNDC5	48 kDa	12	44668420	57518250	83612320	60772370	65823700	67850490	1.04654	0.826337
256	P11940	Polyadenylate-binding protein 1	PABPC1	71 kDa	19	254389700	269907100	297757500	327502700	307680600	299142300	1.13657	0.0793752
257	O75367	Core histone macro-H2A.1	MACROH2A1	40 kDa	10	105105500	138225100	154466800	128432500	177842400	125264700	1.08482	0.642251
258	P63244	Receptor of activated protein C kinase 1	RACK1	35 kDa	12	646858300	562828100	933792000	831409700	833784600	798126900	1.14922	0.442882
259	P98160	Basement membrane-specific heparan sulfate proteoglycan core protein	HSPG2	469 kDa	71	118757300	109849300	88030950	88268850	83366290	99155740	0.855208	0.233425
260	Q9H1E3	Nuclear ubiquitous casein and cyclin-dependent kinase substrate 1	NUCKS1	27 kDa	5	79382800	111407700	64643440	85289170	90904470	83650060	1.01726	0.92543
261	P17096	High mobility group protein HMG-I/HMG-Y	HMGA1	12 kDa	2	178685200	213580800	168707600	169657600	202118900	189019000	0.999683	0.99733
262	O43592	Exportin-T	XPOT	110 kDa	23	11979110	13453480	16544970	15740300	16272490	17064790	1.16914	0.21511
263	P98179	RNA-binding protein 3	RBM3	17 kDa	2	6294229	8199509	7283210	4982719	7432701	5957166	0.843671	0.279871
264	P28066	Proteasome subunit alpha type-5	PSMA5	26 kDa	9	684335300	649645500	711042100	585753000	761533600	658504400	0.980816	0.827264
265	Q9BQ52	Zinc phosphodiesterase ELAC protein 2	ELAC2	92 kDa	18	33244730	37270720	42362280	47030490	48500600	46017840	1.254	0.0596428
266	Q00688	Peptidyl-prolyl cis-trans isomerase FKBP3	FKBP3	25 kDa	8	114954000	99526260	146312100	93975540	72751130	113912400	0.777841	0.217168
267	Q96DI7	U5 small nuclear ribonucleoprotein 40 kDa protein	SNRNP40	39 kDa	11	50122280	57024010	53919250	55233950	54848330	56211290	1.03246	0.476318
268	Q9Y570	Protein phosphatase methylesterase 1	PPME1	42 kDa	10	114206700	131936300	138081600	122039700	128442100	126171300	0.980294	0.762011
269	O60563	Cyclin-T1	CCNT1	81 kDa	6	6106580	6664011	6335407	6655573	5931282	6479167	0.997908	0.963398
270	Q14980	Nuclear mitotic apparatus protein 1	NUMA1	238 kDa	49	79454560	87178550	103565500	85132090	104731800	86405440	1.02247	0.842185
271	O43823	A-kinase anchor protein 8	AKAP8	76 kDa	4	4755577	9263344	7657762	7719522	5325780	5101371	0.837152	0.500371
272	P41250	Glycine--tRNA ligase	GARS1	83 kDa	23	369507400	410233800	507819600	496313400	501650600	498624900	1.16234	0.231493
273	P53041	Serine/threonine-protein phosphatase 5	PPP5C	57 kDa	12	73346410	83602040	96746930	79946970	89567970	89430400	1.02069	0.830924
274	Q9P275	Ubiquitin carboxyl-terminal hydrolase 36	USP36	123 kDa	11	10421900	11580910	10797760	8584139	10462360	11519150	0.931863	0.486702
275	Q92973	Transportin-1	TNPO1	102 kDa	21	139129800	138318900	169521600	182799200	184246000	180125900	1.22418	0.0809719
276	P07237	Protein disulfide-isomerase	P4HB	57 kDa	17	66527310	71309050	88171310	68513000	71250590	76280390	0.955914	0.671608
277	Q13347	Eukaryotic translation initiation factor 3 subunit I	EIF3I	37 kDa	13	154249200	176932100	198607000	176060400	203072200	192387900	1.07877	0.416757
278	Q8N122	Regulatory-associated protein of mTOR	RPTOR	149 kDa	6	2541959	2065875	2711704	2572041	2605592	3022981	1.12037	0.295891
279	P05121	Plasminogen activator inhibitor 1	SERPINE1	45 kDa	11	25163390	21717130	25314870	25192860	25816550	25308470	1.0571	0.362472
280	P51857	Aldo-keto reductase family 1 member D1	AKR1D1	37 kDa	4	13967240	11741420	7783762	11690480	10482620	8554586	0.917452	0.680463
281	P48444	Coatomer subunit delta	ARCN1	57 kDa	18	26699150	31499660	33408030	32443270	29951720	27269940	0.978802	0.808905
282	Q9HAV4	Exportin-5	XPO5	136 kDa	23	20229510	19640040	26290040	28148070	29181170	26307710	1.26417	0.0964543
283	Q08629	Testican-1	SPOCK1	49 kDa	11	76288850	53129780	44575670	53822540	37718900	52964250	0.83052	0.428382
284	Q9H2U2	Inorganic pyrophosphatase 2, mitochondrial	PPA2	38 kDa	14	145888000	157394700	172009300	170284200	193557900	157223300	1.09631	0.313353
285	P49736	DNA replication licensing factor MCM2	MCM2	102 kDa	27	442789500	486813600	651591400	608392000	702594100	566070500	1.18711	0.271917
286	Q9BZE4	Nucleolar GTP-binding protein 1	GTPBP4	74 kDa	10	11844100	14719350	14618260	14985820	15873920	18298940	1.1937	0.123753
287	O60506	Heterogeneous nuclear ribonucleoprotein Q	SYNCRIP	70 kDa	17	344639400	383392800	440852000	373879800	431568600	380542600	1.01464	0.873862
288	P20810	Calpastatin	CAST	77 kDa	14	63963540	75463600	74684410	68692870	68794990	63875750	0.940461	0.377709
289	O43396	Thioredoxin-like protein 1	TXNL1	32 kDa	8	53219220	56671540	58791530	48357520	51779640	54999270	0.919696	0.148705
290	Q16836	Hydroxyacyl-coenzyme A dehydrogenase, mitochondrial	HADH	34 kDa	5	23312790	24330940	28165230	23434230	24029060	26500760	0.975664	0.74607
291	Q9UI08	Ena/VASP-like protein	EVL	45 kDa	8	706712	815043	662172	420072	687486	646168	0.803015	0.224448
292	P43243	Matrin-3	MATR3	95 kDa	15	116041800	137380800	151118100	124334100	119046600	156566000	0.988644	0.926347
293	Q13564	NEDD8-activating enzyme E1 regulatory subunit	NAE1	60 kDa	15	7122681	10805320	9029767	12841390	10107560	8274918	1.15825	0.452088
294	Q86XZ4	Spermatogenesis-associated serine-rich protein 2	SPATS2	60 kDa	3	707093	1060770	1272243	1280412	1105237	1215730	1.18462	0.375826
295	O43615	Mitochondrial import inner membrane translocase subunit TIM44	TIMM44	51 kDa	10	78823130	93457050	66641280	50357380	50628690	89613610	0.79775	0.360663
296	Q07157	Tight junction protein ZO-1	TJP1	195 kDa	35	74223850	87692060	81808230	81428800	86430010	89994510	1.05797	0.375302
297	Q96I25	Splicing factor 45	RBM17	45 kDa	9	25586030	30303120	28523170	28589390	28020320	28692850	1.01055	0.850071
298	P29966	Myristoylated alanine-rich C-kinase substrate	MARCKS	32 kDa	8	71813950	86591680	76025960	115216000	71337160	96203640	1.20614	0.333011
299	P48643	T-complex protein 1 subunit epsilon	CCT5	60 kDa	21	560974800	575073900	785740100	636422100	757615600	780712900	1.13163	0.389527
300	Q7Z6Z7	E3 ubiquitin-protein ligase HUWE1	HUWE1	482 kDa	67	118670000	124184800	143491100	146910600	154534300	145324000	1.1564	0.101912
301	Q53GS9	U4/U6.U5 tri-snRNP-associated protein 2	USP39	65 kDa	14	28734560	29252250	34878530	35931100	40510700	35704650	1.20762	0.0659732
302	Q9P0V9	Septin-10	SEPTIN10	53 kDa	4	4401662	3950712	6925836	5897080	8044613	4231779	1.1895	0.540605
303	Q9Y5K5	Ubiquitin carboxyl-terminal hydrolase isozyme L5	UCHL5	38 kDa	10	25154750	30076190	34300710	30709670	34780330	31254880	1.08057	0.474817
304	P17987	T-complex protein 1 subunit alpha	TCP1	60 kDa	23	89618040	107838800	101579300	121200800	118251900	107866500	1.16146	0.0790082
305	P31947	14-3-3 protein sigma	SFN	28 kDa	10	74829450	113805600	95336250	88630010	102268900	94651110	1.00556	0.968109
306	Q13526	Peptidyl-prolyl cis-trans isomerase NIMA-interacting 1	PIN1	18 kDa	4	2918027	3673408	4177618	4450838	4456050	3838173	1.18349	0.210361
307	P36915	Guanine nucleotide-binding protein-like 1	GNL1	69 kDa	11	13298190	16406840	13619510	17847280	18153970	18341500	1.25432	0.0623869
308	P49189	4-trimethylaminobutyraldehyde dehydrogenase	ALDH9A1	54 kDa	12	29651510	33637780	35945100	39236470	41182090	40098530	1.21447	0.0507605
309	Q15942	Zyxin	ZYX	61 kDa	9	20964990	27535610	25089490	20103730	21600210	17411730	0.80331	0.113433
310	P24593	Insulin-like growth factor-binding protein 5	IGFBP5	31 kDa	8	82905240	88368050	65126090	81119160	81236360	86493710	1.05266	0.618409
311	Q9NX58	Cell growth-regulating nucleolar protein	LYAR	44 kDa	10	46079420	45942410	58635590	53268910	62112710	55898820	1.13689	0.250733
312	P21291	Cysteine and glycine-rich protein 1	CSRP1	21 kDa	9	27473310	30359100	39165020	29690670	36537950	30013150	0.992209	0.955164
313	O15355	Protein phosphatase 1G	PPM1G	59 kDa	11	81527300	87161330	57131800	91826570	88342630	89991250	1.19635	0.249048
314	P07942	Laminin subunit beta-1	LAMB1	198 kDa	25	11470130	7107354	8878156	6256204	7519447	8999214	0.829515	0.365706
315	P15927	Replication protein A 32 kDa subunit	RPA2	29 kDa	4	65145620	75548080	95444750	42250290	41126560	48235820	0.557354	0.0520728
316	O00487	26S proteasome non-ATPase regulatory subunit 14	PSMD14	35 kDa	5	85159010	88345540	92476540	103701500	99615030	101246600	1.14506	0.011654
317	Q9BRT9	DNA replication complex GINS protein SLD5	GINS4	26 kDa	9	24149830	24477050	26802800	28246270	29648220	22743100	1.06904	0.50695
318	Q15084	Protein disulfide-isomerase A6	PDIA6	48 kDa	11	32721370	42151270	57399580	43062670	40112530	47435670	0.98744	0.946946
319	Q99733	Nucleosome assembly protein 1-like 4	NAP1L4	43 kDa	8	74777460	88174410	69048200	67518380	81021950	90070920	1.0285	0.811996
320	P47755	F-actin-capping protein subunit alpha-2	CAPZA2	33 kDa	11	15471340	23030090	18397960	23697680	21545540	17820560	1.10834	0.504685
321	Q9P287	BRCA2 and CDKN1A-interacting protein	BCCIP	36 kDa	8	56674220	58404350	26467840	56939610	67620020	56268290	1.27752	0.334843
322	P48426	Phosphatidylinositol 5-phosphate 4-kinase type-2 alpha	PIP4K2A	46 kDa	14	82916620	73327080	60751620	67149390	62127510	67898260	0.908661	0.413765
323	Q12972	Nuclear inhibitor of protein phosphatase 1	PPP1R8	38 kDa	9	31259550	36795640	41498100	40263570	35263900	38856630	1.0441	0.660659
324	P00966	Argininosuccinate synthase	ASS1	47 kDa	10	35534960	34504640	40544870	40514700	47253520	42427400	1.17734	0.0757524
325	Q05682	Caldesmon	CALD1	93 kDa	19	32307200	36312900	34390880	33235090	38330270	29635530	0.982428	0.842709
326	Q99985	Semaphorin-3C	SEMA3C	85 kDa	19	5222309	5253987	4354879	7171293	6831792	7566396	1.45433	0.00472751
327	Q9BW71	HIRA-interacting protein 3	HIRIP3	62 kDa	4	2469549	2311295	1953511	2262825	2013971	2751608	1.04366	0.732256
328	P08603	Complement factor H	CFH	139 kDa	11	45137470	71840680	71236270	82593510	78025360	50759050	1.12307	0.592461
329	P46063	ATP-dependent DNA helicase Q1	RECQL	73 kDa	12	22470760	22909310	31951890	27862810	31075890	29629350	1.1453	0.349672
330	Q15029	116 kDa U5 small nuclear ribonucleoprotein component	EFTUD2	109 kDa	30	187441300	207971900	216039300	248087400	256505500	241613700	1.22038	0.0186612
331	Q7Z417	Nuclear fragile X mental retardation-interacting protein 2	NUFIP2	76 kDa	12	14741200	20567900	18403960	18603360	20271600	19759020	1.09161	0.439739
332	P53999	Activated RNA polymerase II transcriptional coactivator p15	SUB1	14 kDa	6	222316400	288042400	244904100	247550300	277345900	281983000	1.06834	0.490567
333	O75531	Barrier-to-autointegration factor	BANF1	10 kDa	2	57815390	70029290	95701220	82711940	98916080	84824100	1.19193	0.333458
334	P00533	Epidermal growth factor receptor	EGFR	134 kDa	15	6779769	5203268	7889975	6728127	5060602	7399293	0.965532	0.837789
335	Q9UL46	Proteasome activator complex subunit 2	PSME2	27 kDa	10	102073700	109560400	119421000	107230500	106792900	105728200	0.965856	0.53183
336	Q9NPF4	Probable tRNA N6-adenosine threonylcarbamoyltransferase	OSGEP	36 kDa	8	22489720	25016480	26020390	22551140	21945830	22887670	0.916466	0.184499
337	P51532	Transcription activator BRG1	SMARCA4	185 kDa	15	4518110	7393186	5629393	7465703	6924186	6426596	1.18675	0.322238
338	Q00796	Sorbitol dehydrogenase	SORD	38 kDa	10	28899020	28652960	36724890	37910430	38151110	37063050	1.19992	0.139195
339	O00391	Sulfhydryl oxidase 1	QSOX1	83 kDa	19	67458360	52048280	53436560	51222660	48014740	52156800	0.875398	0.279393
340	O75818	Ribonuclease P protein subunit p40	RPP40	42 kDa	8	15361930	18630730	20055990	14546350	20225670	16029270	0.939918	0.648892
341	Q13200	26S proteasome non-ATPase regulatory subunit 2	PSMD2	100 kDa	29	184905000	176944100	198649800	235235500	232759900	210144700	1.20989	0.0201434
342	Q8IYB8	ATP-dependent RNA helicase SUPV3L1, mitochondrial	SUPV3L1	88 kDa	15	14681050	19061650	19610880	21092000	24546190	21693040	1.26198	0.0775554
343	Q5T200	Zinc finger CCCH domain-containing protein 13	ZC3H13	197 kDa	18	10346810	15303390	16236580	11100130	10478310	10476740	0.765282	0.213586
344	P40261	Nicotinamide N-methyltransferase	NNMT	30 kDa	4	6851676	9435239	10253510	8974437	8966341	8043518	0.979046	0.876283
345	Q8NE71	ATP-binding cassette sub-family F member 1	ABCF1	96 kDa	20	109977900	116430200	114911600	122031100	147410500	123816100	1.15217	0.162571
346	Q9UBB4	Ataxin-10	ATXN10	53 kDa	12	16653140	15643900	22299160	18050070	23522570	18702790	1.10402	0.5224
347	Q9HB71	Calcyclin-binding protein	CACYBP	26 kDa	9	462071400	546866900	545037500	523970600	584651700	550321900	1.06755	0.359418
348	P55060	Exportin-2	CSE1L	110 kDa	28	127528200	154000100	198892900	188784600	187778700	182333800	1.16335	0.335741
349	Q99536	Synaptic vesicle membrane protein VAT-1 homolog	VAT1	42 kDa	10	8607488	8060068	8480063	7890235	9710695	8487263	1.0374	0.624311
350	P54619	5'-AMP-activated protein kinase subunit gamma-1	PRKAG1	38 kDa	15	34716730	31064360	35627860	36660870	38645130	34917770	1.08692	0.175212
351	P27797	Calreticulin	CALR	48 kDa	10	230900200	307528600	362494500	281080400	284192900	298545700	0.958815	0.777651
352	P67870	Casein kinase II subunit beta	CSNK2B	25 kDa	5	79028330	96889270	90317010	90270910	82737190	98317960	1.01912	0.817746
353	Q13098	COP9 signalosome complex subunit 1	GPS1	56 kDa	12	9861679	8658483	13921840	12020290	13493790	13536750	1.20371	0.299005
354	P63151	Serine/threonine-protein phosphatase 2A 55 kDa regulatory subunit B alpha isoform	PPP2R2A	52 kDa	14	62726560	60426650	70984400	62065330	70327630	68811840	1.0364	0.596962
355	O60568	Multifunctional procollagen lysine hydroxylase and glycosyltransferase LH3	PLOD3	85 kDa	22	21325300	24223200	30918180	27169460	25118870	27119690	1.03847	0.766081
356	Q14166	Tubulin--tyrosine ligase-like protein 12	TTLL12	74 kDa	18	51239880	52586910	66479990	56649580	79376870	62891040	1.168	0.322975
357	O75116	Rho-associated protein kinase 2	ROCK2	161 kDa	32	11178730	12883080	13084360	13681680	15664800	13763070	1.16054	0.0886168
358	Q6YN16	Hydroxysteroid dehydrogenase-like protein 2	HSDL2	45 kDa	7	8750355	9048813	9621505	11057120	6678646	11319910	1.05963	0.753605
359	Q13418	Integrin-linked protein kinase	ILK	51 kDa	14	297096500	252495200	277800600	269859100	235929200	238671200	0.899766	0.179022
360	Q9H1Y0	Autophagy protein 5	ATG5	32 kDa	10	30880930	34296150	31980390	33356720	32023360	35487200	1.03818	0.434464
361	Q02790	Peptidyl-prolyl cis-trans isomerase FKBP4	FKBP4	52 kDa	22	237290000	266744800	323085400	295255900	324283800	271113600	1.07681	0.52008
362	P01024	Complement C3	C3	187 kDa	47	265663900	233590400	230332000	269968200	282651900	253958800	1.10553	0.146996
363	P27695	DNA-(apurinic or apyrimidinic site) lyase	APEX1	36 kDa	13	545751300	561136200	719264700	584291000	678157100	625228300	1.03369	0.762296
364	P35269	General transcription factor IIF subunit 1	GTF2F1	58 kDa	8	25219680	28271250	23067060	25514720	29425400	28009890	1.08349	0.32775
365	P28074	Proteasome subunit beta type-5	PSMB5	28 kDa	9	32203540	29384490	41953340	20568260	38043610	35039670	0.904484	0.646577
366	Q9NTZ6	RNA-binding protein 12	RBM12	97 kDa	16	65763300	75556540	87311800	83515800	79829780	72150230	1.03002	0.767094
367	Q05519	Serine/arginine-rich splicing factor 11	SRSF11	54 kDa	5	3263197	3837065	3899973	4217711	3883241	5078040	1.19806	0.169215
368	P68402	Platelet-activating factor acetylhydrolase IB subunit beta	PAFAH1B2	26 kDa	2	2475802	1005815	4400657	4030639	2620569	2301684	1.13583	0.769882
369	Q9UMS4	Pre-mRNA-processing factor 19	PRPF19	55 kDa	10	320563300	301740300	378751900	365623500	344334600	372153100	1.08097	0.366818
370	P36776	Lon protease homolog, mitochondrial	LONP1	106 kDa	20	97041400	114353500	134471600	139930400	151709900	136957900	1.2392	0.110561
371	Q9Y5S2	Serine/threonine-protein kinase MRCK beta	CDC42BPB	194 kDa	20	5146558	4571081	6674475	5356238	6580838	4887958	1.02641	0.866884
372	P04075	Fructose-bisphosphate aldolase A	ALDOA	39 kDa	10	17500100	16021630	32386040	34553100	24401380	29848220	1.34738	0.288785
373	P13984	General transcription factor IIF subunit 2	GTF2F2	28 kDa	8	30400490	42525670	30555530	33497320	45410870	35530510	1.10588	0.5395
374	P26641	Elongation factor 1-gamma	EEF1G	50 kDa	12	543705800	611859400	755041300	712639700	826326100	703018500	1.17344	0.221117
375	Q9BXJ4	Complement C1q tumor necrosis factor-related protein 3	C1QTNF3	27 kDa	6	83439820	81340790	68607850	58606630	81491770	70039820	0.90038	0.397055
376	Q9Y3C1	Nucleolar protein 16	NOP16	21 kDa	6	9228341	12780890	10445370	10650900	11582080	11181900	1.02959	0.79131
377	P11717	Cation-independent mannose-6-phosphate receptor	IGF2R	274 kDa	30	336865300	320249500	244509700	299378200	294952700	293616900	0.984831	0.887419
378	Q9Y265	RuvB-like 1	RUVBL1	50 kDa	15	9584538	11627500	12806370	11551430	13495540	12650910	1.10816	0.33878
379	P49748	Very long-chain specific acyl-CoA dehydrogenase, mitochondrial	ACADVL	70 kDa	22	64094230	71082750	90020000	85915500	94751660	87942940	1.19278	0.19485
380	Q9UN86	Ras GTPase-activating protein-binding protein 2	G3BP2	54 kDa	11	80554410	90618080	76101870	75840790	95556010	96828760	1.08473	0.442223
381	Q16762	Thiosulfate sulfurtransferase	TST	33 kDa	9	33588950	37050310	44699960	41487840	40282450	43958040	1.09007	0.405496
382	P02768	Serum albumin	ALB	69 kDa	22	766492900	568096600	530925700	820525500	763544600	783357500	1.26905	0.143372
383	Q9Y678	Coatomer subunit gamma-1	COPG1	98 kDa	29	19379630	22070420	27789180	28435900	31529650	28232470	1.27382	0.110221
384	Q96EB6	NAD-dependent protein deacetylase sirtuin-1	SIRT1	82 kDa	4	1186373	1464656	1317339	1167048	1263093	1155468	0.903548	0.249759
385	Q96QR8	Transcriptional activator protein Pur-beta	PURB	33 kDa	4	19908950	22529360	24808280	21995380	23022300	19402810	0.957974	0.626264
386	Q9Y4K0	Lysyl oxidase homolog 2	LOXL2	87 kDa	15	30787010	20125300	16547680	22238380	20616530	19832070	0.929247	0.747177
387	Q13287	N-myc-interactor	NMI	35 kDa	12	67600420	76380880	79093950	70602520	71187090	74319990	0.968774	0.57984
388	O95817	BAG family molecular chaperone regulator 3	BAG3	62 kDa	15	31806880	42441470	38467840	37457420	39853660	34962040	0.996069	0.968348
389	Q9BT09	Protein canopy homolog 3	CNPY3	31 kDa	5	4021148	5700880	6272174	4894273	3457051	5000640	0.8348	0.35793
390	O75475	PC4 and SFRS1-interacting protein	PSIP1	60 kDa	8	19176070	21900170	19399490	17851770	19079510	18775710	0.921146	0.20246
391	Q9BYZ2	L-lactate dehydrogenase A-like 6B	LDHAL6B	42 kDa	2	1721341	879452	793911	1752156	3067028	2312003	2.10068	0.0649106
392	P30084	Enoyl-CoA hydratase, mitochondrial	ECHS1	31 kDa	11	99079560	123445000	131262700	116113400	115715500	133607400	1.03293	0.752793
393	O00567	Nucleolar protein 56	NOP56	66 kDa	12	24423280	25943680	28641920	29518790	28404880	25990060	1.06208	0.369964
394	Q12996	Cleavage stimulation factor subunit 3	CSTF3	83 kDa	15	28904160	34592350	36288430	41700340	46089740	41730570	1.298	0.0267362
395	P09923	Intestinal-type alkaline phosphatase	ALPI	57 kDa	14	377361400	391340700	588724000	420645900	504131900	439986400	1.00541	0.975646
396	P06576	ATP synthase subunit beta, mitochondrial	ATP5F1B	57 kDa	17	22507580	27149570	37850870	32365000	28219700	28916260	1.02277	0.899384
397	P51571	Translocon-associated protein subunit delta	SSR4	19 kDa	5	3343589	3723607	14372860	13760360	5192892	15953800	1.62812	0.41041
398	P05362	Intercellular adhesion molecule 1	ICAM1	58 kDa	7	11116260	14365400	16522480	15397340	16794180	17810740	1.19041	0.226479
399	P13591	Neural cell adhesion molecule 1	NCAM1	95 kDa	11	225266400	237829400	168207100	171655300	156171800	196072900	0.829871	0.235788
400	P26639	Threonine--tRNA ligase 1, cytoplasmic	TARS1	83 kDa	29	154307500	195336300	217620100	212699000	253920300	252649400	1.26796	0.0981996
401	Q96CT7	Coiled-coil domain-containing protein 124	CCDC124	26 kDa	8	38225240	37752300	42636140	40419620	41576400	37336210	1.00606	0.910894
402	P55145	Mesencephalic astrocyte-derived neurotrophic factor	MANF	21 kDa	4	34274920	35851570	50432570	35179250	33160770	33697850	0.846372	0.352674
403	P01859	Immunoglobulin heavy constant gamma 2	IGHG2	36 kDa	7	12116090	11150620	10539030	9462919	8169531	11576980	0.864038	0.261405
404	P82970	High mobility group nucleosome-binding domain-containing protein 5	HMGN5	32 kDa	5	21360680	26529960	23630900	26614980	29704270	20354590	1.07204	0.620483
405	P38117	Electron transfer flavoprotein subunit beta	ETFB	28 kDa	9	84703300	93381550	112527300	95541000	111029400	96244310	1.04199	0.699101
406	P31937	3-hydroxyisobutyrate dehydrogenase, mitochondrial	HIBADH	35 kDa	6	20827760	28181680	31147830	25507070	27268770	26766220	0.992325	0.95316
407	P38606	V-type proton ATPase catalytic subunit A	ATP6V1A	68 kDa	15	10590300	13714420	19988420	16324180	16625630	22818490	1.25907	0.337355
408	O60925	Prefoldin subunit 1	PFDN1	14 kDa	3	17819500	23197330	28831550	23212030	21601390	27337450	1.03296	0.844948
409	P46778	60S ribosomal protein L21	RPL21	19 kDa	3	8683551	7615436	12792730	9642232	9980114	8455713	0.965156	0.853723
410	O00566	U3 small nucleolar ribonucleoprotein protein MPP10	MPHOSPH10	79 kDa	9	14007910	17033140	13626020	16424320	16195910	15988260	1.08824	0.346824
411	Q02818	Nucleobindin-1	NUCB1	54 kDa	19	15153930	13320920	14794070	11920960	8699258	12594170	0.767627	0.0906464
412	P49792	E3 SUMO-protein ligase RanBP2	RANBP2	358 kDa	47	54662140	70244060	63890550	57555900	64903240	61524510	0.974506	0.770325
413	P62140	Serine/threonine-protein phosphatase PP1-beta catalytic subunit	PPP1CB	37 kDa	15	72002720	62751430	70347480	64739830	77713550	73852270	1.05463	0.48224
414	P23193	Transcription elongation factor A protein 1	TCEA1	34 kDa	8	7707462	9646584	7428532	6795680	7523733	6294298	0.831782	0.17486
415	P27824	Calnexin	CANX	68 kDa	12	2617888	2640639	9430858	12801850	4548752	11990530	1.99744	0.233428
416	Q8N9N8	Probable RNA-binding protein EIF1AD	EIF1AD	19 kDa	4	8056299	6876524	5435721	7606629	6080234	5544314	0.944161	0.718691
417	P26358	DNA (cytosine-5)-methyltransferase 1	DNMT1	183 kDa	21	25520150	29637550	29058550	29648160	29760710	29306100	1.05342	0.363958
418	P46013	Proliferation marker protein Ki-67	MKI67	359 kDa	72	268023600	323025900	309785600	280347500	279874500	294328300	0.94862	0.453644
419	P01033	Metalloproteinase inhibitor 1	TIMP1	23 kDa	4	23231130	28206850	26026210	23707700	25563510	22461320	0.926009	0.334636
420	Q9Y2Z0	Protein SGT1 homolog	SUGT1	41 kDa	11	27432890	34107900	27015910	30126390	28971200	25570330	0.956087	0.658554
421	P10155	60 kDa SS-A/Ro ribonucleoprotein	RO60	61 kDa	13	25198400	32828320	31797520	29830850	33204160	31798040	1.05576	0.569508
422	Q9HCD5	Nuclear receptor coactivator 5	NCOA5	66 kDa	10	4483459	5665680	6375936	4501933	5249864	5785622	0.940233	0.65029
423	Q13151	Heterogeneous nuclear ribonucleoprotein A0	HNRNPA0	31 kDa	6	45271730	58403770	45366660	41254460	43508550	42091570	0.851132	0.230171
424	Q12792	Twinfilin-1	TWF1	40 kDa	10	21935860	20270620	15943920	15625960	27588510	15160120	1.00386	0.987725
425	P55072	Transitional endoplasmic reticulum ATPase	VCP	89 kDa	32	60380430	86146930	141143900	85626770	93995150	199858700	1.31915	0.529241
426	P10809	60 kDa heat shock protein, mitochondrial	HSPD1	61 kDa	19	419869700	497093200	638708400	475873100	511250100	490474700	0.949814	0.725509
427	O95295	SNARE-associated protein Snapin	SNAPIN	15 kDa	4	13845120	20733260	21510810	18942120	22183140	15199040	1.00419	0.98146
428	Q15642	Cdc42-interacting protein 4	TRIP10	68 kDa	16	32356510	32243130	34078740	32425250	35780980	33662830	1.03233	0.416114
429	Q8WUM4	Programmed cell death 6-interacting protein	PDCD6IP	96 kDa	25	14485950	15532720	18747650	17092450	19586310	14975560	1.05922	0.630185
430	P80217	Interferon-induced 35 kDa protein	IFI35	32 kDa	10	76456730	85133120	88807300	91716940	89839510	86588920	1.07088	0.243092
431	P36969	Phospholipid hydroperoxide glutathione peroxidase	GPX4	22 kDa	7	30729700	31931800	31606880	26145130	35491250	29358850	0.965278	0.730117
432	P14625	Endoplasmin	HSP90B1	92 kDa	23	25677490	29397530	36449120	41600600	32306310	40378410	1.24869	0.152792
433	P54136	Arginine--tRNA ligase, cytoplasmic	RARS1	75 kDa	24	119777700	144203800	195152800	165760700	197437300	154801600	1.12821	0.496374
434	Q9NVX2	Notchless protein homolog 1	NLE1	53 kDa	12	34752840	36333880	44629840	36556200	37689300	41892300	1.00364	0.970203
435	Q86W42	THO complex subunit 6 homolog	THOC6	38 kDa	13	25554670	26518430	34813760	30246970	31530170	28324530	1.037	0.756352
436	Q96HY6	DDRGK domain-containing protein 1	DDRGK1	36 kDa	5	2854585	3331635	2706763	5362929	5522128	4529430	1.73333	0.00685112
437	O60936	Nucleolar protein 3	NOL3	23 kDa	6	34343780	40493970	35394980	36220880	40824680	38065670	1.04426	0.526581
438	Q9BY67	Cell adhesion molecule 1	CADM1	49 kDa	2	15093110	17328500	12533300	14911950	13046940	12556710	0.90125	0.412821
439	P49368	T-complex protein 1 subunit gamma	CCT3	61 kDa	24	94216570	103513600	136318500	120190000	123373200	120614900	1.09019	0.514245
440	P23297	Protein S100-A1	S100A1	11 kDa	2	36472690	28562280	27911130	32779200	28176700	27730790	0.954173	0.684414
441	Q9UL45	Biogenesis of lysosome-related organelles complex 1 subunit 6	BLOC1S6	20 kDa	2	4302108	3816972	6917932	5507523	5914867	4770785	1.07689	0.735446
442	Q9Y266	Nuclear migration protein nudC	NUDC	38 kDa	14	87628440	84657830	83695720	103653700	112916500	76853730	1.14627	0.36759
443	O76061	Stanniocalcin-2	STC2	33 kDa	5	15608620	18543160	13724530	14353730	16963890	15117070	0.969889	0.783083
444	Q9Y281	Cofilin-2	CFL2	19 kDa	10	71183500	83081010	65758610	57664510	63499960	63864530	0.840953	0.137601
445	O94875	Sorbin and SH3 domain-containing protein 2	SORBS2	124 kDa	13	33617400	41093840	38832190	32693290	35275130	38385950	0.936684	0.437779
446	O14929	Histone acetyltransferase type B catalytic subunit	HAT1	50 kDa	7	45790480	50850920	64470490	57514460	67847430	55029830	1.11967	0.405022
447	O14936	Peripheral plasma membrane protein CASK	CASK	105 kDa	12	10769020	10522230	12103220	12960860	12924620	12166030	1.13946	0.067224
448	P22102	Trifunctional purine biosynthetic protein adenosine-3	GART	108 kDa	22	53050380	58786750	67021890	64483160	70961640	68414980	1.13978	0.164877
449	P55287	Cadherin-11	CDH11	88 kDa	11	158321900	167221600	135205600	151789900	141606400	144775800	0.950999	0.518906
450	Q9UPT8	Zinc finger CCCH domain-containing protein 4	ZC3H4	140 kDa	15	15241970	17797540	17052450	15066100	16516130	16192780	0.953746	0.439486
451	Q16740	ATP-dependent Clp protease proteolytic subunit, mitochondrial	CLPP	30 kDa	3	10266700	10615810	10078010	9836698	10992730	11395430	1.04084	0.468055
452	P14316	Interferon regulatory factor 2	IRF2	39 kDa	1	314886	408308	556360	469277	324528	496330	1.00827	0.970164
453	Q96AC1	Fermitin family homolog 2	FERMT2	78 kDa	23	242101200	260366700	281042800	261001000	267931800	270823200	1.02073	0.682195
454	Q5RKV6	Exosome complex component MTR3	EXOSC6	28 kDa	4	33050240	30891170	37872160	29338680	34930150	30680250	0.932578	0.440657
455	Q9UBQ0	Vacuolar protein sorting-associated protein 29	VPS29	21 kDa	6	30802230	31532180	46503510	31637780	37878140	34496770	0.955666	0.789826
456	P34096	Ribonuclease 4	RNASE4	17 kDa	2	114361300	99410930	79136170	111353100	81417540	103476100	1.0114	0.938698
457	P12814	Alpha-actinin-1	ACTN1	103 kDa	48	59784020	60919350	71254110	86557460	70434660	72138190	1.19365	0.127306
458	P30566	Adenylosuccinate lyase	ADSL	55 kDa	15	33014040	39971540	46725070	48096520	48520630	42711020	1.16387	0.236676
459	O43172	U4/U6 small nuclear ribonucleoprotein Prp4	PRPF4	58 kDa	14	51051810	55720200	66461310	67811840	74701470	63806350	1.19099	0.126808
460	Q9H4M9	EH domain-containing protein 1	EHD1	61 kDa	25	11970800	13351230	16971550	15541860	18647020	15985540	1.18634	0.224962
461	O43776	Asparagine--tRNA ligase, cytoplasmic	NARS1	63 kDa	18	62961790	78855240	87609490	88047960	99289520	83737910	1.18153	0.19287
462	P39687	Acidic leucine-rich nuclear phosphoprotein 32 family member A	ANP32A	29 kDa	8	339744000	434665300	172471100	443443400	411367700	348283600	1.27059	0.384955
463	Q9BXV9	EKC/KEOPS complex subunit GON7	GON7	11 kDa	1	6005678	8129445	8281890	8064352	7420201	8366155	1.06396	0.592652
464	Q9Y3I0	RNA-splicing ligase RtcB homolog	RTCB	55 kDa	16	163462800	167862500	190556000	179853600	197735800	192659300	1.09268	0.192852
465	P01023	Alpha-2-macroglobulin	A2M	163 kDa	13	36635920	32357180	19958720	48668900	34160370	49916330	1.49233	0.10938
466	O60502	Protein O-GlcNAcase	OGA	103 kDa	15	38648820	36283810	37876480	43073730	41175630	41142590	1.11154	0.0115236
467	P10909	Clusterin	CLU	52 kDa	8	896562300	767073800	630724900	655877900	737680700	611800200	0.874038	0.343331
468	P38919	Eukaryotic initiation factor 4A-III	EIF4A3	47 kDa	11	173828100	165292500	214541600	195491200	199481200	211611700	1.09559	0.367049
469	Q5H9R7	Serine/threonine-protein phosphatase 6 regulatory subunit 3	PPP6R3	98 kDa	16	8161462	9138864	10300810	9932801	10931720	11090630	1.15775	0.129494
470	Q5T4S7	E3 ubiquitin-protein ligase UBR4	UBR4	574 kDa	59	86435900	89880450	107865800	103131500	97807720	107522900	1.08544	0.351869
471	O14818	Proteasome subunit alpha type-7	PSMA7	28 kDa	10	809339300	835768000	931700700	874346900	915239000	822768200	1.01379	0.809846
472	P80723	Brain acid soluble protein 1	BASP1	23 kDa	11	237728600	301187500	266838000	234797900	242942100	263909700	0.920442	0.37315
473	Q13769	THO complex subunit 5 homolog	THOC5	79 kDa	12	17519650	17946300	19681310	21828870	20197200	17457980	1.07864	0.388292
474	Q99798	Aconitate hydratase, mitochondrial	ACO2	85 kDa	21	22927680	22875430	33341710	31764160	30478300	27654130	1.13585	0.415921
475	Q9NSE4	Isoleucine--tRNA ligase, mitochondrial	IARS2	114 kDa	28	87771720	98719920	138874000	127642500	157755600	128432800	1.27189	0.197189
476	P02794	Ferritin heavy chain	FTH1	21 kDa	7	33964250	38529170	37026030	24192580	28600000	34317930	0.795388	0.109494
477	Q9NQG5	Regulation of nuclear pre-mRNA domain-containing protein 1B	RPRD1B	37 kDa	8	38771700	48659820	44992490	47953460	49469810	50321560	1.1157	0.214404
478	Q9Y5X1	Sorting nexin-9	SNX9	67 kDa	8	34629780	36312270	36141350	39213210	35511750	40096020	1.07226	0.199729
479	P46736	Lys-63-specific deubiquitinase BRCC36	BRCC3	36 kDa	10	10063930	10421370	13363560	10415870	11923430	11769780	1.00769	0.944926
480	Q9BS26	Endoplasmic reticulum resident protein 44	ERP44	47 kDa	12	15182140	18794020	27464500	19621110	14120370	19979680	0.874358	0.575389
481	Q9UPY8	Microtubule-associated protein RP/EB family member 3	MAPRE3	32 kDa	6	14113570	11819000	10334740	9940504	10085650	12541100	0.897978	0.426841
482	P21796	Voltage-dependent anion-selective channel protein 1	VDAC1	31 kDa	9	10118740	20807720	36637090	36854870	12307260	45192910	1.39654	0.517254
483	Q9Y2W2	WW domain-binding protein 11	WBP11	70 kDa	15	61525050	82043810	61982110	75766710	67346020	78225650	1.07681	0.536266
484	Q01813	ATP-dependent 6-phosphofructokinase, platelet type	PFKP	86 kDa	18	122982400	125839600	188604400	176875000	174404300	177602800	1.20908	0.290438
485	P10644	cAMP-dependent protein kinase type I-alpha regulatory subunit	PRKAR1A	43 kDa	9	45897990	47487730	41892020	43566530	39018960	38614930	0.895938	0.111117
486	Q8N543	Prolyl 3-hydroxylase OGFOD1	OGFOD1	63 kDa	15	35914530	34536220	38901320	42048560	38671830	37331370	1.07956	0.203121
487	P22314	Ubiquitin-like modifier-activating enzyme 1	UBA1	118 kDa	26	128207900	148988600	189084200	186990700	218839200	188056400	1.27367	0.125726
488	Q96RS6	NudC domain-containing protein 1	NUDCD1	67 kDa	10	22513730	25168370	29921550	27996850	29244640	24365220	1.05158	0.640225
489	P26640	Valine--tRNA ligase	VARS1	140 kDa	28	25697060	26162790	32109160	30940050	37048850	33112270	1.20403	0.106093
490	Q96GM8	Target of EGR1 protein 1	TOE1	57 kDa	7	17045880	16174130	19076320	21832340	22062710	20045760	1.22266	0.0255254
491	P32004	Neural cell adhesion molecule L1	L1CAM	140 kDa	17	60133520	52752360	44533950	51064480	43744790	47308130	0.902792	0.384624
492	P31153	S-adenosylmethionine synthase isoform type-2	MAT2A	44 kDa	12	125835700	134892200	161234000	148109100	178321800	140722700	1.1071	0.390673
493	O15514	DNA-directed RNA polymerase II subunit RPB4	POLR2D	16 kDa	4	8547929	9567327	9596374	10860550	9309880	9534923	1.07195	0.332029
494	Q6NVY1	3-hydroxyisobutyryl-CoA hydrolase, mitochondrial	HIBCH	43 kDa	9	17132600	19226400	23083120	21431960	22863200	22980610	1.13179	0.269706
495	Q12904	Aminoacyl tRNA synthase complex-interacting multifunctional protein 1	AIMP1	34 kDa	10	20319670	28046330	28025020	31327480	30968660	24266670	1.13315	0.381746
496	O60256	Phosphoribosyl pyrophosphate synthase-associated protein 2	PRPSAP2	41 kDa	12	45579410	49396320	56723340	51787770	53458100	52971170	1.04297	0.576092
497	P22059	Oxysterol-binding protein 1	OSBP	89 kDa	14	26634120	29085530	34361810	26511290	33609320	32281530	1.02576	0.81832
498	Q8IWA5	Choline transporter-like protein 2	SLC44A2	80 kDa	9	8638903	8200949	10064850	11685950	9678613	10081780	1.1688	0.143528
499	Q14566	DNA replication licensing factor MCM6	MCM6	93 kDa	29	56624340	81181880	82365210	70470630	90395680	76643150	1.07875	0.606256
500	P61019	Ras-related protein Rab-2A	RAB2A	24 kDa	10	103120900	105521100	116868500	97194100	88764890	97270970	0.87011	0.0589621
501	Q96KP4	Cytosolic non-specific dipeptidase	CNDP2	53 kDa	19	88551420	99976510	115867600	114403200	114085900	113358400	1.12304	0.255576
502	Q92598	Heat shock protein 105 kDa	HSPH1	97 kDa	27	92698960	124578400	118129400	113679800	126921400	112766100	1.05355	0.618494
503	Q14847	LIM and SH3 domain protein 1	LASP1	30 kDa	8	5099372	8742087	7363447	5526780	6541447	5676601	0.836827	0.392902
504	P31040	Succinate dehydrogenase [ubiquinone] flavoprotein subunit, mitochondrial	SDHA	73 kDa	12	13436230	14365260	17557420	14556450	17377980	16343590	1.06436	0.555888
505	P54920	Alpha-soluble NSF attachment protein	NAPA	33 kDa	15	7417725	6624974	11317050	7732008	10625280	6750118	0.990049	0.966175
506	Q5SSJ5	Heterochromatin protein 1-binding protein 3	HP1BP3	61 kDa	6	11379880	13854020	15026340	15679490	15747920	14862650	1.14977	0.196668
507	Q15102	Platelet-activating factor acetylhydrolase IB subunit gamma	PAFAH1B3	26 kDa	3	9610946	9622572	8108612	7849934	7154314	8880028	0.873534	0.179797
508	P26196	Probable ATP-dependent RNA helicase DDX6	DDX6	54 kDa	18	138347800	163853800	166339700	162125500	184595100	159465300	1.08034	0.354773
509	P32969	60S ribosomal protein L9	RPL9	22 kDa	5	37027860	43465960	52659480	44253000	48767430	47635090	1.05634	0.642963
510	Q10570	Cleavage and polyadenylation specificity factor subunit 1	CPSF1	161 kDa	17	7534959	7174326	9765599	8855132	10654150	8475800	1.14342	0.330625
511	Q9NUJ1	Mycophenolic acid acyl-glucuronide esterase, mitochondrial	ABHD10	34 kDa	11	38841230	38126070	50613470	50447910	42604130	45739530	1.08787	0.477445
512	Q9HAV7	GrpE protein homolog 1, mitochondrial	GRPEL1	24 kDa	6	36684710	61249860	50242230	44204870	55622830	38749180	0.935213	0.732862
513	P46379	Large proline-rich protein BAG6	BAG6	119 kDa	17	4035465	5685365	6490894	4966415	4780685	4877247	0.902085	0.540503
514	P08865	40S ribosomal protein SA	RPSA	33 kDa	9	597917000	619147100	908030300	715191900	781998000	775469100	1.06944	0.67448
515	Q12860	Contactin-1	CNTN1	113 kDa	23	1027021000	820583100	750553200	778926800	691775000	800159000	0.874027	0.320464
516	O15511	Actin-related protein 2/3 complex subunit 5	ARPC5	16 kDa	4	7954639	10243290	14008850	11075740	9541447	9993414	0.95044	0.794963
517	P04040	Catalase	CAT	60 kDa	18	20183230	19765570	32515550	23612880	19532960	27282610	0.971905	0.895142
518	P01834	Immunoglobulin kappa constant	IGKC	12 kDa	4	32840760	27182380	23704600	27808780	29131390	28162570	1.01642	0.879862
519	P62495	Eukaryotic peptide chain release factor subunit 1	ETF1	49 kDa	15	386590100	478481200	536863800	471604800	504034500	485529300	1.04225	0.69884
520	Q1ED39	Lysine-rich nucleolar protein 1	KNOP1	52 kDa	6	6163831	8727183	8098771	8547347	9129507	8118028	1.12201	0.351858
521	P25815	Protein S100-P	S100P	10 kDa	3	1199424000	1535635000	1424616000	1414026000	1337492000	1361295000	0.988734	0.890573
522	P50454	Serpin H1	SERPINH1	46 kDa	13	12464230	11476270	13223500	12440090	7892124	11709700	0.862176	0.351551
523	P13645	Keratin, type I cytoskeletal 10	KRT10	59 kDa	17	992908300	511066000	887017600	347589100	472687300	238073900	0.442641	0.0753467
524	Q15427	Splicing factor 3B subunit 4	SF3B4	44 kDa	4	1213633	1288133	2147825	2115067	2236161	1998363	1.36562	0.194559
525	P48960	Adhesion G protein-coupled receptor E5	ADGRE5	92 kDa	8	42014000	40853200	41776090	44018890	36860990	39451550	0.965406	0.564748
526	P62937	Peptidyl-prolyl cis-trans isomerase A	PPIA	18 kDa	9	1170038000	1513971000	1902775000	1341493000	1449244000	1662028000	0.970781	0.860382
527	P50990	T-complex protein 1 subunit theta	CCT8	60 kDa	28	391352800	411212300	467437500	521201600	519833400	482382500	1.19954	0.0450287
528	Q9BY42	Replication termination factor 2	RTF2	34 kDa	7	10259490	11466690	12042940	13095190	14163010	12256080	1.17013	0.0659738
529	Q6PKG0	La-related protein 1	LARP1	124 kDa	17	98375620	111100600	135320600	112885000	117682600	119777700	1.01609	0.881307
530	Q9UBI6	Guanine nucleotide-binding protein G(I)/G(S)/G(O) subunit gamma-12	GNG12	8 kDa	4	18021590	19330260	21206330	18552570	19187720	22328900	1.0258	0.753017
531	P43490	Nicotinamide phosphoribosyltransferase	NAMPT	56 kDa	18	81051580	96097430	119286600	115854900	127126700	126735900	1.24721	0.149191
532	Q96BK5	PIN2/TERF1-interacting telomerase inhibitor 1	PINX1	37 kDa	4	5008119	6732739	6582283	5948238	5669550	6229438	0.974027	0.805025
533	Q86XP3	ATP-dependent RNA helicase DDX42	DDX42	103 kDa	21	88639650	96538210	103275200	106521700	118544400	101301400	1.13144	0.131748
534	P53618	Coatomer subunit beta	COPB1	107 kDa	26	8093127	9632138	13520560	9566014	11951450	12559650	1.09061	0.644387
535	P33993	DNA replication licensing factor MCM7	MCM7	81 kDa	23	18937130	17703390	24631860	24963880	27530620	24818440	1.26179	0.11453
536	P39023	60S ribosomal protein L3	RPL3	46 kDa	4	4749159	4758460	8549412	7555330	8032592	7733265	1.29153	0.299265
537	P28799	Progranulin	GRN	64 kDa	12	82207740	68053420	67306990	79406330	75752910	68592560	1.02842	0.742736
538	P08133	Annexin A6	ANXA6	76 kDa	20	24041840	23788370	35550730	32856450	36851150	30645940	1.20355	0.283002
539	P31151	Protein S100-A7	S100A7	11 kDa	4	19379650	9886266	4021568	5330331	14212180	6081229	0.769771	0.659351
540	Q9GZU8	PSME3-interacting protein	PSME3IP1	29 kDa	4	13253310	19874990	16979810	16868870	16784420	16854140	1.00797	0.950952
541	Q13868	Exosome complex component RRP4	EXOSC2	33 kDa	10	50158560	54151520	69852510	51118390	67173430	62666060	1.03902	0.783428
542	Q9Y383	Putative RNA-binding protein Luc7-like 2	LUC7L2	47 kDa	9	9394872	12298680	13539430	15352250	13086860	11411570	1.13106	0.410867
543	Q9Y6N7	Roundabout homolog 1	ROBO1	181 kDa	22	42183310	35348800	34416490	25818130	33787580	35399060	0.848646	0.218003
544	P78318	Immunoglobulin-binding protein 1	IGBP1	39 kDa	11	28789920	35117850	28995130	27633860	31900260	30208340	0.965981	0.690303
545	O00571	ATP-dependent RNA helicase DDX3X	DDX3X	73 kDa	18	40744750	42218710	43128910	48463500	49244690	44468470	1.12756	0.0501657
546	P24534	Elongation factor 1-beta	EEF1B2	25 kDa	5	286936400	314074800	352585200	278504300	267314200	321822200	0.909862	0.321428
547	Q8IZ83	Aldehyde dehydrogenase family 16 member A1	ALDH16A1	85 kDa	16	41315650	45454870	49391220	42373870	43680530	47433010	0.980359	0.767096
548	P78371	T-complex protein 1 subunit beta	CCT2	57 kDa	26	114410000	123046900	153601600	130220500	182179300	164644100	1.21988	0.216695
549	Q9Y285	Phenylalanine--tRNA ligase alpha subunit	FARSA	58 kDa	9	19175840	16862840	26844620	27074620	29127450	23520630	1.26779	0.198008
550	P14923	Junction plakoglobin	JUP	82 kDa	16	11109900	7602504	8693491	7342497	10495840	7174916	0.912696	0.622436
551	Q13451	Peptidyl-prolyl cis-trans isomerase FKBP5	FKBP5	51 kDa	18	10953700	10157190	8927314	7789961	8975600	7990151	0.824141	0.0762939
552	Q32P44	Echinoderm microtubule-associated protein-like 3	EML3	95 kDa	10	12517300	11840900	11865930	13086840	13088760	13952540	1.10777	0.0258014
553	P51610	Host cell factor 1	HCFC1	209 kDa	19	50907680	62373770	59955190	54675530	63201010	53292890	0.988067	0.889844
554	P61160	Actin-related protein 2	ACTR2	45 kDa	12	476264100	436596700	514256400	533789800	532246000	496020300	1.09455	0.173817
555	Q9H7D7	WD repeat-containing protein 26	WDR26	72 kDa	7	8898064	9870626	13695640	11448200	12357870	13675130	1.15453	0.379111
556	P78316	Nucleolar protein 14	NOP14	98 kDa	6	19730300	22324640	22604460	18864730	20950050	18193620	0.897138	0.147816
557	Q6UN15	Pre-mRNA 3'-end-processing factor FIP1	FIP1L1	67 kDa	8	21479690	29461310	24723950	22873970	27176710	25878560	1.00349	0.975451
558	Q8WVC0	RNA polymerase-associated protein LEO1	LEO1	75 kDa	8	8579230	9449318	8345292	8224412	8443996	7591243	0.919838	0.175363
559	Q9H0D6	5'-3' exoribonuclease 2	XRN2	109 kDa	13	3697765	6216429	3880479	3908860	5039150	7414077	1.18612	0.552012
560	Q8IZ73	RNA pseudouridylate synthase domain-containing protein 2	RPUSD2	61 kDa	14	14578740	17836630	16927930	16865080	17651180	17993140	1.06416	0.393967
561	P07437	Tubulin beta chain	TUBB	50 kDa	20	132509400	156104600	148722200	161843400	146332400	138022800	1.02026	0.779472
562	Q9H4F8	SPARC-related modular calcium-binding protein 1	SMOC1	48 kDa	12	27381160	31665440	19369140	23844460	23120540	23619460	0.900131	0.544281
563	Q9Y221	60S ribosome subunit biogenesis protein NIP7 homolog	NIP7	20 kDa	5	39139440	42025580	50741270	43074770	45183830	40296870	0.974597	0.788406
564	P02792	Ferritin light chain	FTL	20 kDa	5	19745440	23417790	19557230	21668310	23800080	16447350	0.98717	0.921563
565	P49589	Cysteine--tRNA ligase, cytoplasmic	CARS1	85 kDa	22	58423200	64944720	78220840	99050740	85478450	93090010	1.37716	0.0282328
566	Q15008	26S proteasome non-ATPase regulatory subunit 6	PSMD6	46 kDa	14	76979810	81134570	85903900	96031090	99832810	94918570	1.19164	0.0115186
567	P10253	Lysosomal alpha-glucosidase	GAA	105 kDa	11	29621120	23896490	25606490	25128910	25582970	21869220	0.917307	0.356504
568	Q5VZK9	F-actin-uncapping protein LRRC16A	CARMIL1	152 kDa	12	3484546	3877178	4570604	4578233	5482942	5041242	1.26567	0.0642218
569	O95433	Activator of 90 kDa heat shock protein ATPase homolog 1	AHSA1	38 kDa	12	70876380	75433700	95622550	84472510	84170140	95227030	1.09067	0.452094
570	O00303	Eukaryotic translation initiation factor 3 subunit F	EIF3F	38 kDa	9	294185500	315906400	308746500	375757200	352671900	327545200	1.14925	0.0635011
571	P60174	Triosephosphate isomerase	TPI1	31 kDa	10	12661990	16604140	19959950	15264330	14601960	16389740	0.939665	0.688965
572	Q9UHB6	LIM domain and actin-binding protein 1	LIMA1	85 kDa	13	28533290	30768660	32172370	28023270	28598150	27802180	0.922921	0.151183
573	P02545	Prelamin-A/C	LMNA	74 kDa	32	2390908000	2946031000	2808676000	2739869000	2774885000	2948057000	1.03894	0.602212
574	Q92597	Protein NDRG1	NDRG1	43 kDa	3	1614551	3002775	4100680	3525171	2934529	2677748	1.04811	0.868332
575	P68036	Ubiquitin-conjugating enzyme E2 L3	UBE2L3	18 kDa	5	17104450	18583290	16287880	16544390	16513630	18467680	0.991344	0.879993
576	P49588	Alanine--tRNA ligase, cytoplasmic	AARS1	107 kDa	27	280944700	317442500	391095900	383832500	428057500	406294500	1.23113	0.129762
577	P12270	Nucleoprotein TPR	TPR	267 kDa	48	118726800	144206600	160874000	160542900	184033300	154592700	1.17782	0.180086
578	Q96QC0	Serine/threonine-protein phosphatase 1 regulatory subunit 10	PPP1R10	99 kDa	9	9834711	11349590	13659160	14799390	14323240	12554620	1.19613	0.170276
579	Q9BTE3	Mini-chromosome maintenance complex-binding protein	MCMBP	73 kDa	13	39697750	45750480	49778470	44630030	52252750	55179940	1.1245	0.261969
580	P50991	T-complex protein 1 subunit delta	CCT4	58 kDa	17	140106900	146902900	184849800	161725500	183032200	182411500	1.11722	0.323226
581	P09417	Dihydropteridine reductase	QDPR	26 kDa	6	14940220	16524480	18477720	17259740	15576250	18142970	1.02075	0.800199
582	Q9Y5J1	U3 small nucleolar RNA-associated protein 18 homolog	UTP18	62 kDa	6	4407659	4172961	4355888	5561166	5440109	6264342	1.33464	0.0236069
583	Q96RL1	BRCA1-A complex subunit RAP80	UIMC1	80 kDa	6	3181348	3241838	3437789	3823653	3713111	3673122	1.13679	0.0128638
584	Q96GS4	BLOC-1-related complex subunit 6	BORCS6	37 kDa	5	5702808	6345975	6401750	5272867	6375971	5447694	0.926615	0.341005
585	O75822	Eukaryotic translation initiation factor 3 subunit J	EIF3J	29 kDa	11	13949170	17232100	13424370	15400790	21780100	16746060	1.20897	0.2577
586	Q7Z2W4	Zinc finger CCCH-type antiviral protein 1	ZC3HAV1	101 kDa	15	28355620	34470340	36807400	34294350	34170050	31450750	1.00283	0.974664
587	Q06830	Peroxiredoxin-1	PRDX1	22 kDa	8	57610720	64124290	82065340	71196790	74560120	56539780	0.992622	0.95921
588	P29083	General transcription factor IIE subunit 1	GTF2E1	49 kDa	5	5810858	7653803	5982920	7021923	5304002	4635328	0.872152	0.421347
589	P04792	Heat shock protein beta-1	HSPB1	23 kDa	5	54990210	71861510	82152520	83771290	61831560	45291070	0.91335	0.683941
590	Q9NU22	Midasin	MDN1	633 kDa	2	2770644	3123924	3661747	5026032	2418090	12273480	2.06331	0.369395
591	Q9UQE7	Structural maintenance of chromosomes protein 3	SMC3	142 kDa	37	63407300	72326550	79767660	89637520	93167210	87104020	1.25247	0.0481113
592	P35241	Radixin	RDX	69 kDa	22	2021091	1837756	2171799	2024060	2714457	2395094	1.18289	0.199219
593	Q9BY44	Eukaryotic translation initiation factor 2A	EIF2A	65 kDa	13	9678688	8232073	12020640	11346530	9588222	9583044	1.01959	0.885541
594	Q9H0C8	Integrin-linked kinase-associated serine/threonine phosphatase 2C	ILKAP	43 kDa	7	26162450	25644100	28635850	25935220	30953090	28402850	1.06028	0.408752
595	O43818	U3 small nucleolar RNA-interacting protein 2	RRP9	52 kDa	12	47203900	60097090	67687610	53643010	61750550	61884190	1.01308	0.915379
596	P13010	X-ray repair cross-complementing protein 5	XRCC5	83 kDa	20	384183300	481724100	642358400	533602300	548608600	556297300	1.08635	0.622819
597	Q96C86	m7GpppX diphosphatase	DCPS	39 kDa	9	6823494	7722430	8005272	8297344	8723179	8451963	1.12954	0.0990964
598	P52597	Heterogeneous nuclear ribonucleoprotein F	HNRNPF	46 kDa	8	2197580	3721126	2090121	1814540	2556558	2957001	0.915003	0.737658
599	P53004	Biliverdin reductase A	BLVRA	33 kDa	8	58570860	73733980	70778630	77665100	90268330	71668860	1.17982	0.167269
600	P31944	Caspase-14	CASP14	28 kDa	6	12531320	9590665	20882580	2073865	5261977	2958634	0.239381	0.0747721
601	Q9UJX4	Anaphase-promoting complex subunit 5	ANAPC5	85 kDa	12	4214840	5187831	7072751	7138002	7034601	6200696	1.23659	0.257711
602	P54886	Delta-1-pyrroline-5-carboxylate synthase	ALDH18A1	87 kDa	15	17256180	20065770	26518460	28869080	28680000	26799300	1.32124	0.123223
603	Q93009	Ubiquitin carboxyl-terminal hydrolase 7	USP7	128 kDa	27	60982320	65511720	85812650	84284530	81838050	83034500	1.17357	0.248248
604	P48637	Glutathione synthetase	GSS	52 kDa	9	7023465	11095610	12434460	12176800	12762520	13225740	1.24912	0.257133
605	O43143	Pre-mRNA-splicing factor ATP-dependent RNA helicase DHX15	DHX15	91 kDa	20	126165200	131956800	164766700	174477100	193707600	177145500	1.28954	0.0574231
606	Q92859	Neogenin	NEO1	160 kDa	15	53806110	42630340	33564810	40782210	46965260	51066550	1.06779	0.685438
607	Q9BY43	Charged multivesicular body protein 4a	CHMP4A	25 kDa	7	19853220	22666620	24553550	26554180	25222640	20774110	1.08166	0.459137
608	Q9Y490	Talin-1	TLN1	270 kDa	70	53397150	31437190	55768920	26050710	41984210	25956870	0.668489	0.182762
609	Q96I15	Selenocysteine lyase	SCLY	48 kDa	11	5221656	5537045	6442436	6134940	7403462	6612983	1.17151	0.131722
610	Q96DG6	Carboxymethylenebutenolidase homolog	CMBL	28 kDa	7	14311920	15617620	14318190	19080260	13363830	17324280	1.12477	0.391166
611	Q5VW32	BRO1 domain-containing protein BROX	BROX	46 kDa	2	1745993	2055623	2341108	2184289	2345052	1907287	1.04785	0.672974
612	P42229	Signal transducer and activator of transcription 5A	STAT5A	91 kDa	14	1331966	1444334	1357352	1579590	1163781	1334466	0.986497	0.89397
613	O43237	Cytoplasmic dynein 1 light intermediate chain 2	DYNC1LI2	54 kDa	14	29338100	30660750	40690120	36888640	38514790	40668640	1.15278	0.286467
614	Q96C36	Pyrroline-5-carboxylate reductase 2	PYCR2	34 kDa	10	28534570	31958450	35435220	37102620	31612500	33693710	1.06756	0.447549
615	Q15404	Ras suppressor protein 1	RSU1	32 kDa	9	22346370	23170730	26243720	25920160	18661600	22144740	0.929846	0.533682
616	P42765	3-ketoacyl-CoA thiolase, mitochondrial	ACAA2	42 kDa	9	74988430	44157770	76465710	57796290	42913660	49633570	0.768581	0.287463
617	O00399	Dynactin subunit 6	DCTN6	21 kDa	2	4534824	5287854	5246275	5140876	5409162	5429506	1.06043	0.342199
618	Q96KR1	Zinc finger RNA-binding protein	ZFR	117 kDa	20	26829360	30230840	39291090	34360000	34836160	32069600	1.05101	0.705962
619	P19021	Peptidyl-glycine alpha-amidating monooxygenase	PAM	108 kDa	15	6185797	6047949	5568259	4798085	5842840	3758603	0.808871	0.192941
620	Q01518	Adenylyl cyclase-associated protein 1	CAP1	52 kDa	14	305091000	326809500	422441700	332166300	325725500	345134700	0.951329	0.683459
621	Q13190	Syntaxin-5	STX5	40 kDa	7	14987220	15465740	15617350	15559770	16157600	15725250	1.02979	0.154126
622	P49915	GMP synthase [glutamine-hydrolyzing]	GMPS	77 kDa	25	8070783	9457144	10946530	10897860	11645450	8545809	1.09182	0.524433
623	Q8WWM7	Ataxin-2-like protein	ATXN2L	113 kDa	19	15354900	20166620	20257900	18029490	18151520	16581420	0.945912	0.60465
624	P53985	Monocarboxylate transporter 1	SLC16A1	54 kDa	4	2092686	1868680	3830873	2931991	2635229	2897839	1.08634	0.753524
625	Q02539	Histone H1.1	H1-1	22 kDa	2	1957999	2272887	2484507	2611429	2761809	2767260	1.21221	0.0776109
626	Q8NFH3	Nucleoporin Nup43	NUP43	42 kDa	4	5271027	5539635	8388929	6482255	6457016	5360416	0.953129	0.799354
627	P45974	Ubiquitin carboxyl-terminal hydrolase 5	USP5	96 kDa	22	17533240	21964750	27168570	20099200	24708130	24168850	1.03464	0.822139
628	Q04695	Keratin, type I cytoskeletal 17	KRT17	48 kDa	15	40375480	42152850	61023180	59823940	45217480	55244990	1.11658	0.524429
629	Q5M775	Cytospin-B	SPECC1	119 kDa	11	37253120	33995700	44763170	45490260	45630380	31252270	1.05483	0.733001
630	Q01831	DNA repair protein complementing XP-C cells	XPC	106 kDa	4	1242407	1671913	1546934	2006650	1711763	1681724	1.21045	0.132598
631	P07919	Cytochrome b-c1 complex subunit 6, mitochondrial	UQCRH	11 kDa	1	498349	1194057	702542	1092233	556462	774339	1.01173	0.972971
632	Q9UI26	Importin-11	IPO11	113 kDa	15	10674210	10071120	15780630	15373670	11587410	14227630	1.12766	0.51345
633	P02790	Hemopexin	HPX	52 kDa	18	11753200000	9951347000	9341037000	8469344000	8795810000	9565300000	0.864228	0.18223
634	P52907	F-actin-capping protein subunit alpha-1	CAPZA1	33 kDa	9	52175010	58245910	67853540	63618880	57568920	56851720	0.998682	0.988636
635	Q5JRX3	Presequence protease, mitochondrial	PITRM1	117 kDa	19	30920860	30776980	40289710	39292730	36077560	37635300	1.10803	0.364466
636	Q9Y315	Deoxyribose-phosphate aldolase	DERA	35 kDa	14	38131300	43175390	50265120	46444780	49011240	48174690	1.09165	0.371834
637	Q9H2G2	STE20-like serine/threonine-protein kinase	SLK	143 kDa	26	9891967	12669820	13070190	13825350	15645220	13263140	1.19931	0.134013
638	Q9H6F5	Coiled-coil domain-containing protein 86	CCDC86	40 kDa	7	8050551	9304862	7211752	5895468	6263338	8001423	0.820617	0.174383
639	O94826	Mitochondrial import receptor subunit TOM70	TOMM70	67 kDa	14	53401080	49485070	62177050	71553820	71105930	53611340	1.18907	0.22371
640	P26373	60S ribosomal protein L13	RPL13	24 kDa	3	73989270	82862010	81605210	85207740	106852800	100242500	1.22581	0.0907535
641	P05556	Integrin beta-1	ITGB1	88 kDa	16	13486330	12532940	15419790	14284900	12109580	15996550	1.02297	0.833673
642	P42330	Aldo-keto reductase family 1 member C3	AKR1C3	37 kDa	5	1063745	1270668	1878686	706539	1407122	1616392	0.885347	0.684687
643	Q96FQ6	Protein S100-A16	S100A16	12 kDa	6	28026840	26003590	35520330	30897750	31824480	26967610	1.00155	0.989534
644	P35908	Keratin, type II cytoskeletal 2 epidermal	KRT2	65 kDa	26	592602200	385250300	188030400	193620000	260279900	213487500	0.572431	0.28951
645	Q4LDE5	Sushi, von Willebrand factor type A, EGF and pentraxin domain-containing protein 1	SVEP1	390 kDa	14	25208860	14981040	13362060	19368570	17127200	21110970	1.07572	0.756226
646	Q9UKS6	Protein kinase C and casein kinase substrate in neurons protein 3	PACSIN3	48 kDa	9	9438181	9471401	11857090	8842900	10652940	12636200	1.04438	0.755637
647	O60271	C-Jun-amino-terminal kinase-interacting protein 4	SPAG9	146 kDa	29	11663980	12521140	14183880	9513559	11595620	12275940	0.870107	0.210583
648	P06396	Gelsolin	GSN	86 kDa	14	52674400	52267610	50961140	42934580	36235240	41670180	0.775097	0.0239298
649	Q9Y696	Chloride intracellular channel protein 4	CLIC4	29 kDa	12	8317694	8584045	7259881	7124198	7702970	7210929	0.912112	0.215757
650	Q1KMD3	Heterogeneous nuclear ribonucleoprotein U-like protein 2	HNRNPUL2	85 kDa	13	10014870	11001840	10819770	6426222	14527980	4561119	0.801449	0.562677
651	Q16181	Septin-7	SEPTIN7	51 kDa	14	125531600	120211600	123115000	104552400	109623500	113970200	0.889627	0.0202749
652	Q9UJ70	N-acetyl-D-glucosamine kinase	NAGK	37 kDa	11	19061710	20201640	27286710	24174050	24426580	22418540	1.06715	0.625107
653	Q92696	Geranylgeranyl transferase type-2 subunit alpha	RABGGTA	65 kDa	16	14120420	13354220	16994970	18991230	16549280	14363900	1.12221	0.357519
654	Q96EE3	Nucleoporin SEH1	SEH1L	40 kDa	8	13978900	14603560	17797330	17089220	16283030	14779580	1.03821	0.692345
655	Q8TDH9	Biogenesis of lysosome-related organelles complex 1 subunit 5	BLOC1S5	22 kDa	6	7911367	6736036	9981341	7309783	7974025	7808123	0.937601	0.646165
656	P12268	Inosine-5'-monophosphate dehydrogenase 2	IMPDH2	56 kDa	17	18706770	19158580	21672970	23055520	22647660	21416860	1.12734	0.0929597
657	P22105	Tenascin-X	TNXB	458 kDa	17	53123360	43345150	38390840	43544200	38081850	43925710	0.930983	0.562214
658	P62136	Serine/threonine-protein phosphatase PP1-alpha catalytic subunit	PPP1CA	38 kDa	16	27424730	24193510	30197030	33600980	45774040	44183670	1.51022	0.0501821
659	Q9NY12	H/ACA ribonucleoprotein complex subunit 1	GAR1	22 kDa	2	55660710	74053320	83976660	68823780	60718550	71863560	0.942511	0.682013
660	Q9NUQ3	Gamma-taxilin	TXLNG	61 kDa	10	21991850	25715890	28444330	23537010	30051930	24660000	1.02754	0.811691
661	P41252	Isoleucine--tRNA ligase, cytoplasmic	IARS1	145 kDa	36	164378900	186706400	249061200	254220500	286952100	251331300	1.32052	0.111252
662	P01876	Immunoglobulin heavy constant alpha 1	IGHA1	38 kDa	4	48939880	42824890	40553730	36811360	37673620	37367750	0.845329	0.111023
663	Q96P70	Importin-9	IPO9	116 kDa	12	19364140	23097650	32712110	32886260	42057980	35496010	1.46913	0.0796125
664	Q5T3I0	G patch domain-containing protein 4	GPATCH4	50 kDa	8	6587365	7372613	6330845	4900048	8090977	4090513	0.841836	0.476405
665	P49750	YLP motif-containing protein 1	YLPM1	242 kDa	17	6426794	8695467	7721234	6878246	7211452	7725797	0.954998	0.664177
666	P49366	Deoxyhypusine synthase	DHPS	41 kDa	8	11103620	13995760	16877210	15321110	15081880	15034160	1.08244	0.560578
667	O95340	Bifunctional 3'-phosphoadenosine 5'-phosphosulfate synthase 2	PAPSS2	70 kDa	18	9264086	14901200	13306090	12642800	10967300	15469200	1.04291	0.814465
668	Q9ULX6	A-kinase anchor protein 8-like	AKAP8L	72 kDa	5	17101780	20947910	20458330	22144650	17469630	22086610	1.05457	0.618368
669	P13667	Protein disulfide-isomerase A4	PDIA4	73 kDa	23	97432470	121265800	124502900	126263100	114587500	125117400	1.06634	0.479943
670	Q99627	COP9 signalosome complex subunit 8	COPS8	23 kDa	2	1075214	1231638	1437229	745343	1402821	898008	0.813597	0.375754
671	P02462	Collagen alpha-1(IV) chain	COL4A1	161 kDa	4	691997	565255	677194	565923	653115	606539	0.943721	0.492951
672	Q9UNS2	COP9 signalosome complex subunit 3	COPS3	48 kDa	10	544224	2980034	4161536	4711422	6466601	2599143	1.79255	0.258978
673	Q99519	Sialidase-1	NEU1	45 kDa	8	15447380	18114110	16927040	16369650	19943430	14093450	0.998376	0.989315
674	Q16864	V-type proton ATPase subunit F	ATP6V1F	13 kDa	4	14555490	17561560	14256380	13633450	15662890	10814980	0.864963	0.305428
675	P13987	CD59 glycoprotein	CD59	14 kDa	3	17009120	17812500	30867470	17744640	20989100	19772430	0.890653	0.650185
676	Q9HCG8	Pre-mRNA-splicing factor CWC22 homolog	CWC22	105 kDa	3	527595	648567	551587	455632	722711	902143	1.20416	0.464062
677	P15559	NAD(P)H dehydrogenase [quinone] 1	NQO1	31 kDa	5	92557600	80723690	95775220	63455500	91869220	83382030	0.887199	0.366693
678	Q05048	Cleavage stimulation factor subunit 1	CSTF1	48 kDa	8	36165960	36178910	42409840	48955090	50952190	40416240	1.22281	0.102369
679	P33992	DNA replication licensing factor MCM5	MCM5	82 kDa	27	103929700	119285000	159429600	169798500	195176400	172630200	1.40497	0.0702616
680	P54105	Methylosome subunit pICln	CLNS1A	26 kDa	6	13379150	12838870	9286593	13327710	12753140	13872740	1.12531	0.367732
681	P11021	Endoplasmic reticulum chaperone BiP	HSPA5	72 kDa	26	72607660	78707410	111283200	73903450	84810410	98207590	0.978382	0.899849
682	Q96H79	Zinc finger CCCH-type antiviral protein 1-like	ZC3HAV1L	33 kDa	3	603201	690119	978870	708456	1139882	903326	1.21102	0.39746
683	Q969P0	Immunoglobulin superfamily member 8	IGSF8	65 kDa	8	7234656	7331211	6394276	7395475	5419256	6910925	0.941103	0.580624
684	P28838	Cytosol aminopeptidase	LAP3	56 kDa	14	7948152	9197429	9764109	11253330	10566650	10765860	1.21093	0.0573535
685	O94903	Pyridoxal phosphate homeostasis protein	PLPBP	30 kDa	7	20510080	22263000	25976650	22898100	28582270	26172010	1.12949	0.267308
686	P69905	Hemoglobin subunit alpha	HBA1	15 kDa	8	167163200	333209600	332437100	311837900	285046700	8102996000	10.4464	0.419586
687	P14209	CD99 antigen	CD99	19 kDa	3	893161	2768023	696799	585034	2676601	1810421	1.16385	0.803853
688	O75937	DnaJ homolog subfamily C member 8	DNAJC8	30 kDa	8	9343683	12827160	12430860	11080560	11196380	9305669	0.912747	0.480551
689	P60900	Proteasome subunit alpha type-6	PSMA6	27 kDa	10	1379828000	1549509000	1538983000	1365540000	1345342000	1562452000	0.956363	0.504806
690	P63241	Eukaryotic translation initiation factor 5A-1	EIF5A	17 kDa	6	493456400	560216500	576626700	512234500	564482900	591968800	1.02355	0.730024
691	O95707	Ribonuclease P protein subunit p29	POP4	25 kDa	7	11328560	10423850	14002650	11583540	11967390	12966480	1.02132	0.841538
692	Q05639	Elongation factor 1-alpha 2	EEF1A2	50 kDa	8	2112760000	2388096000	2594057000	2545657000	2517528000	2419179000	1.05461	0.455196
693	Q02241	Kinesin-like protein KIF23	KIF23	110 kDa	3	669967	814136	971284	579020	699526	1719069	1.22083	0.670589
694	Q8N9N2	Activating signal cointegrator 1 complex subunit 1	ASCC1	46 kDa	3	3071577	3336002	3846885	3068153	3966568	3719570	1.04874	0.660873
695	O95372	Acyl-protein thioesterase 2	LYPLA2	25 kDa	5	9025693	6747532	8465040	4863990	6504677	8958272	0.83863	0.408447
696	P15311	Ezrin	EZR	69 kDa	22	238452200	226565700	288095600	296923700	293500900	245192600	1.10955	0.336954
697	P14854	Cytochrome c oxidase subunit 6B1	COX6B1	10 kDa	2	2820871	3611846	3414687	4383995	2744310	4016440	1.13174	0.491967
698	Q06265	Exosome complex component RRP45	EXOSC9	49 kDa	8	63975130	67179780	74565200	73136520	78051750	68986740	1.07026	0.305568
699	Q7Z478	ATP-dependent RNA helicase DHX29	DHX29	155 kDa	17	13002790	16897870	20207690	19648620	23285470	18820780	1.23243	0.205274
700	O43765	Small glutamine-rich tetratricopeptide repeat-containing protein alpha	SGTA	34 kDa	10	31498760	37429580	40231180	35768690	39187780	33110090	0.989987	0.913313
701	P09661	U2 small nuclear ribonucleoprotein A'	SNRPA1	28 kDa	8	162945700	170760200	206753400	177689000	166310100	183577200	0.976163	0.788265
702	Q14684	Ribosomal RNA processing protein 1 homolog B	RRP1B	84 kDa	7	4649896	5877643	4932852	5003013	5486387	4625597	0.977659	0.811185
703	Q9NVP1	ATP-dependent RNA helicase DDX18	DDX18	75 kDa	17	32522300	31462330	49939680	54702430	47235630	52857940	1.35876	0.138808
704	P08581	Hepatocyte growth factor receptor	MET	156 kDa	15	48488200	59823880	53806530	49291650	49261030	50939490	0.922116	0.326703
705	O14497	AT-rich interactive domain-containing protein 1A	ARID1A	242 kDa	16	9366157	12525980	12688260	13763280	13010740	12228410	1.12788	0.30669
706	Q6PJT7	Zinc finger CCCH domain-containing protein 14	ZC3H14	83 kDa	12	5646515	6955098	6809274	5069082	5752438	5214586	0.82614	0.0949987
707	O15232	Matrilin-3	MATN3	53 kDa	6	1769490	1774844	1374618	2372033	2095859	1084990	1.12888	0.651338
708	Q13547	Histone deacetylase 1	HDAC1	55 kDa	12	17875370	17776980	22816660	20630910	25293640	24013820	1.19616	0.154932
709	Q8TF74	WAS/WASL-interacting protein family member 2	WIPF2	46 kDa	6	10455590	16308850	13239020	9786745	12332510	14711260	0.920683	0.657757
710	Q9H788	SH2 domain-containing protein 4A	SH2D4A	53 kDa	8	12555240	13416710	17542520	14940550	14600500	15760530	1.04107	0.73901
711	P49790	Nuclear pore complex protein Nup153	NUP153	154 kDa	15	14692130	18060200	17015750	15321100	16595100	15255230	0.947825	0.488943
712	Q14203	Dynactin subunit 1	DCTN1	142 kDa	33	38047290	39842980	49716310	49285320	53510950	48749870	1.1876	0.146351
713	Q9NR45	Sialic acid synthase	NANS	40 kDa	9	18903710	22047700	27027600	23039370	28253840	22828340	1.09036	0.529511
714	Q9NQW7	Xaa-Pro aminopeptidase 1	XPNPEP1	70 kDa	19	6805955	8417762	9926674	8968675	8998818	8571171	1.0552	0.660133
715	Q9Y316	Protein MEMO1	MEMO1	34 kDa	7	19454520	16081830	20860790	15028270	16596350	15577050	0.836951	0.153678
716	P31948	Stress-induced-phosphoprotein 1	STIP1	63 kDa	20	247712900	290688900	284307800	266191300	280171500	301603800	1.0307	0.645972
717	Q9NXH9	tRNA (guanine(26)-N(2))-dimethyltransferase	TRMT1	72 kDa	17	46105480	47569240	63284480	56156450	58255190	59543670	1.10828	0.411689
718	Q93008	Probable ubiquitin carboxyl-terminal hydrolase FAF-X	USP9X	292 kDa	36	11825790	12388630	14742670	14877210	16834140	15258880	1.20569	0.0770291
719	Q8IYB3	Serine/arginine repetitive matrix protein 1	SRRM1	102 kDa	9	7332008	7226479	4185152	8765028	9627338	7357604	1.3738	0.141739
720	O94907	Dickkopf-related protein 1	DKK1	29 kDa	6	11411190	20413360	18223530	14659350	15693190	12622230	0.85867	0.482123
721	Q9UBQ7	Glyoxylate reductase/hydroxypyruvate reductase	GRHPR	36 kDa	10	7815474	5896964	9804609	8079729	12791250	10456110	1.3321	0.217031
722	O43815	Striatin	STRN	86 kDa	10	19046150	28417110	21445770	24342490	22115950	25687160	1.04697	0.746684
723	O75787	Renin receptor	ATP6AP2	39 kDa	6	5912114	6855454	6222219	5321951	5231572	4479803	0.791653	0.0267335
724	Q9BWD1	Acetyl-CoA acetyltransferase, cytosolic	ACAT2	41 kDa	4	11695350	14843520	19168540	16734410	16637370	15391030	1.06685	0.687068
725	Q7L014	Probable ATP-dependent RNA helicase DDX46	DDX46	117 kDa	19	4267445	4593954	5532627	5105035	5838774	5736972	1.15887	0.175807
726	P35590	Tyrosine-protein kinase receptor Tie-1	TIE1	125 kDa	7	1044879	1526498	844555	1557182	1091903	1136966	1.10835	0.650769
727	O15156	Zinc finger and BTB domain-containing protein 7B	ZBTB7B	58 kDa	3	3298650	3518211	2276921	3035600	2694201	3674723	1.03417	0.839954
728	Q07021	Complement component 1 Q subcomponent-binding protein, mitochondrial	C1QBP	31 kDa	3	79217450	145422000	104560900	129788800	164936100	139530600	1.31912	0.206353
729	P22087	rRNA 2'-O-methyltransferase fibrillarin	FBL	34 kDa	8	72875690	80925580	88516520	77755200	81542340	84302210	1.00529	0.936573
730	Q9BXS6	Nucleolar and spindle-associated protein 1	NUSAP1	49 kDa	9	8741376	11165100	10838560	11806970	10797700	9846575	1.0555	0.583015
731	Q9NNW7	Thioredoxin reductase 2, mitochondrial	TXNRD2	57 kDa	11	16509770	16051120	22096900	18201570	18950090	17888840	1.007	0.953966
732	P33991	DNA replication licensing factor MCM4	MCM4	97 kDa	26	14500790	13498150	19730750	17178240	22028150	16747040	1.1723	0.347042
733	O43719	HIV Tat-specific factor 1	HTATSF1	86 kDa	22	44887990	44215310	35290090	48021640	54041280	46268420	1.19244	0.1143
734	O95400	CD2 antigen cytoplasmic tail-binding protein 2	CD2BP2	38 kDa	8	25817570	33319130	26970030	32432980	35114030	33485150	1.17334	0.15684
735	Q14244	Ensconsin	MAP7	84 kDa	7	13040610	14207770	16111680	15658920	16232920	17914470	1.14867	0.133279
736	Q96HC4	PDZ and LIM domain protein 5	PDLIM5	64 kDa	13	21504980	27080590	27469870	20170650	20630910	23765220	0.848944	0.178369
737	P09211	Glutathione S-transferase P	GSTP1	23 kDa	5	14686520	16182630	15974360	16362550	16874170	16497740	1.06172	0.166672
738	Q53F19	Nuclear cap-binding protein subunit 3	NCBP3	71 kDa	7	4789916	5866373	3561718	5911407	5758093	5556496	1.21156	0.269636
739	P11142	Heat shock cognate 71 kDa protein	HSPA8	71 kDa	23	2401938000	2473889000	2866800000	2389360000	2607936000	2348881000	0.948796	0.480355
740	P20645	Cation-dependent mannose-6-phosphate receptor	M6PR	31 kDa	3	11229250	14008260	21513320	17338280	16587350	16217530	1.07256	0.74872
741	Q00266	S-adenosylmethionine synthase isoform type-1	MAT1A	44 kDa	5	4477350	3697696	2846626	2929494	3244541	3174377	0.848185	0.35772
742	Q12931	Heat shock protein 75 kDa, mitochondrial	TRAP1	80 kDa	17	42379170	48023860	54625900	56933110	56696940	58835440	1.18918	0.11801
743	P18669	Phosphoglycerate mutase 1	PGAM1	29 kDa	8	1528952	1462055	1950542	1693732	1571491	1830322	1.03116	0.783257
744	Q7Z4V5	Hepatoma-derived growth factor-related protein 2	HDGFL2	74 kDa	7	5424858	6075916	5589661	7238152	7775238	6664765	1.26844	0.0221667
745	Q9NSK0	Kinesin light chain 4	KLC4	69 kDa	10	2371046	1714094	2047296	2303661	2997732	2431516	1.26098	0.135914
746	Q99497	Parkinson disease protein 7	PARK7	20 kDa	4	150892	219881	962196	247618	896487	864971	1.50722	0.539136
747	Q03252	Lamin-B2	LMNB2	70 kDa	24	121375800	133079500	133128600	122185800	128866200	124626300	0.969283	0.431982
748	P51812	Ribosomal protein S6 kinase alpha-3	RPS6KA3	84 kDa	18	38322820	32813480	36635880	36130240	38611840	36322070	1.03055	0.589254
749	Q92621	Nuclear pore complex protein Nup205	NUP205	228 kDa	14	6094109	5365591	7693824	7993055	6965522	7476252	1.17132	0.24915
750	Q9NWV8	BRISC and BRCA1-A complex member 1	BABAM1	37 kDa	6	18541410	19368420	22443250	23544330	23326720	17923990	1.0736	0.541584
751	P35625	Metalloproteinase inhibitor 3	TIMP3	24 kDa	7	144398600	168832100	108232300	120890400	136668900	140131500	0.943596	0.704299
752	P19525	Interferon-induced, double-stranded RNA-activated protein kinase	EIF2AK2	62 kDa	5	4625689	6516415	5440127	7442762	7406616	6765269	1.30348	0.0764274
753	A1L4H1	Soluble scavenger receptor cysteine-rich domain-containing protein SSC5D	SSC5D	166 kDa	5	857272	903743	805927	800494	741146	1004105	0.991742	0.939592
754	Q9UH65	Switch-associated protein 70	SWAP70	69 kDa	15	23242380	27234900	31887230	28164760	29611330	27825580	1.0393	0.710884
755	Q6GMV2	SET and MYND domain-containing protein 5	SMYD5	47 kDa	7	11942360	16066650	12817890	15626370	20976360	18223170	1.34289	0.0816937
756	P23142	Fibulin-1	FBLN1	77 kDa	16	80801100	86965650	61950880	75448520	66369720	71041550	0.926615	0.541103
757	Q12872	Splicing factor, suppressor of white-apricot homolog	SFSWAP	105 kDa	10	5687169	5693517	5816098	6226983	5832226	5675361	1.03127	0.389744
758	P42785	Lysosomal Pro-X carboxypeptidase	PRCP	56 kDa	4	17236220	13407110	12905580	12726000	11811980	12479540	0.850022	0.249874
759	Q08945	FACT complex subunit SSRP1	SSRP1	81 kDa	14	281918000	305136500	271772200	364010800	338356200	350023300	1.22538	0.00785411
760	P08238	Heat shock protein HSP 90-beta	HSP90AB1	83 kDa	34	203294000	208697400	247499700	242383700	282268600	212989700	1.1185	0.353157
761	P01889	HLA class I histocompatibility antigen, B alpha chain	HLA-B	40 kDa	5	1693897	524059	675738	1493254	1313295	1351998	1.43711	0.369669
762	Q9C0B1	Alpha-ketoglutarate-dependent dioxygenase FTO	FTO	58 kDa	18	11703120	11879470	16191380	13045390	15528980	14898890	1.09301	0.508709
763	Q13573	SNW domain-containing protein 1	SNW1	61 kDa	11	28124770	33750100	35708220	35085790	37194600	33119000	1.0801	0.38363
764	Q96J01	THO complex subunit 3	THOC3	39 kDa	7	21359910	23269370	27544830	22067460	25907670	21887840	0.967978	0.750957
765	O76021	Ribosomal L1 domain-containing protein 1	RSL1D1	55 kDa	11	63794100	61289080	81309620	61471100	72908180	68412420	0.982552	0.876767
766	Q92804	TATA-binding protein-associated factor 2N	TAF15	62 kDa	4	5064465	3557572	6237596	7122321	6061344	3554780	1.12644	0.660057
767	P08670	Vimentin	VIM	54 kDa	25	470967300	571369400	483859300	500839400	474809500	556263100	1.00375	0.964125
768	P24752	Acetyl-CoA acetyltransferase, mitochondrial	ACAT1	45 kDa	8	34900560	39925610	65028920	49492250	56170200	47425930	1.09462	0.687944
769	Q13561	Dynactin subunit 2	DCTN2	44 kDa	14	32301450	35385460	30700840	29554910	27658420	31156280	0.898177	0.12826
770	Q04837	Single-stranded DNA-binding protein, mitochondrial	SSBP1	17 kDa	4	34369890	35588370	41686790	39358400	39379840	41124840	1.07361	0.349711
771	O43852	Calumenin	CALU	37 kDa	12	47907790	52061420	54560510	47957990	42270290	56983390	0.952643	0.642289
772	P20290	Transcription factor BTF3	BTF3	22 kDa	3	11940130	16036390	19135230	14301550	17095790	12039600	0.921998	0.658249
773	P04406	Glyceraldehyde-3-phosphate dehydrogenase	GAPDH	36 kDa	12	3387100000	3227033000	4330001000	4519867000	4036640000	4460157000	1.18937	0.171838
774	Q6P1J9	Parafibromin	CDC73	61 kDa	14	19811850	19062590	25249270	21621540	23585770	25648410	1.10498	0.390356
775	P49593	Protein phosphatase 1F	PPM1F	50 kDa	12	21827360	26944520	27865930	25297610	25928580	25421100	1.00012	0.998814
776	P48506	Glutamate--cysteine ligase catalytic subunit	GCLC	73 kDa	15	16480540	17796390	19279430	17385170	17238870	19812000	1.01643	0.813192
777	O43598	2'-deoxynucleoside 5'-phosphate N-hydrolase 1	DNPH1	19 kDa	2	3529175	4187322	4240887	4982205	4041615	3257212	1.02707	0.857481
778	Q6L8Q7	2',5'-phosphodiesterase 12	PDE12	67 kDa	9	18570260	19473410	26073610	22142750	26145300	23549990	1.12042	0.403097
779	Q16763	Ubiquitin-conjugating enzyme E2 S	UBE2S	24 kDa	5	8154207	8156087	8566062	8755996	9339253	7752810	1.03906	0.562525
780	P32322	Pyrroline-5-carboxylate reductase 1, mitochondrial	PYCR1	33 kDa	10	33649050	27346850	31628580	30355130	30210430	30493360	0.983098	0.805283
781	O15318	DNA-directed RNA polymerase III subunit RPC7	POLR3G	26 kDa	5	5851314	6100763	4593434	6641667	7119092	6522578	1.22591	0.10178
782	Q9H5X1	Cytosolic iron-sulfur assembly component 2A	CIAO2A	18 kDa	4	5040699	5596011	5661942	5885786	4307236	5772697	0.979573	0.853639
783	Q9Y520	Protein PRRC2C	PRRC2C	317 kDa	35	50075030	66135780	65520350	59353860	57964890	59557730	0.973286	0.787658
784	P06733	Alpha-enolase	ENO1	47 kDa	13	894338300	1071203000	1231431000	898862800	1309713000	1057774000	1.0217	0.888343
785	Q6IBS0	Twinfilin-2	TWF2	40 kDa	11	19608580	25030170	26595290	23145630	24135570	20906030	0.957228	0.693586
786	Q9HCB6	Spondin-1	SPON1	91 kDa	13	13705100	12307330	11430420	12637700	10494410	11701390	0.930311	0.392334
787	Q9BYG3	MKI67 FHA domain-interacting nucleolar phosphoprotein	NIFK	34 kDa	5	5496661	7233004	7978649	7749967	8076164	5935327	1.05086	0.741464
788	Q8WXF1	Paraspeckle component 1	PSPC1	59 kDa	8	39206880	46618940	55034670	49158100	54059080	49325000	1.08293	0.491316
789	Q9NQ55	Suppressor of SWI4 1 homolog	PPAN	53 kDa	7	10691490	12347100	12476770	9646637	11696650	11363850	0.920929	0.336449
790	P00751	Complement factor B	CFB	86 kDa	17	55343760	48068430	41081930	44480490	44364500	43053310	0.912828	0.415283
791	P13716	Delta-aminolevulinic acid dehydratase	ALAD	36 kDa	10	3511978	10334790	6711519	4041407	9266904	4598470	0.871025	0.74916
792	Q9UKL0	REST corepressor 1	RCOR1	53 kDa	7	8883129	9536996	10857940	9663132	12025650	8654121	1.03637	0.777576
793	P07686	Beta-hexosaminidase subunit beta	HEXB	63 kDa	12	76265650	66460730	75494510	83691770	77556190	80843970	1.10939	0.11055
794	P00338	L-lactate dehydrogenase A chain	LDHA	37 kDa	16	491601500	410550100	547448500	499246100	502638600	482685600	1.02412	0.798107
795	Q14192	Four and a half LIM domains protein 2	FHL2	32 kDa	9	9043013	10386070	11348820	8628627	11143560	9163430	0.940143	0.578706
796	P27816	Microtubule-associated protein 4	MAP4	121 kDa	24	268876000	281767600	339893200	286604500	329874500	271102300	0.996681	0.973731
797	Q6P3W7	SCY1-like protein 2	SCYL2	104 kDa	9	16618870	19156380	19048610	17456120	17351750	19535390	0.991234	0.890599
798	Q7Z7G0	Target of Nesh-SH3	ABI3BP	119 kDa	8	31975720	26298120	23992790	20234960	20565670	25409600	0.804825	0.14697
799	Q6UWP8	Suprabasin	SBSN	61 kDa	2	226211	289292	61888	243939	71206.7	148048	0.802217	0.676588
800	P05114	Non-histone chromosomal protein HMG-14	HMGN1	11 kDa	4	14575050	17576530	15978870	17135070	15433270	17624300	1.04285	0.565409
801	Q86YP4	Transcriptional repressor p66-alpha	GATAD2A	68 kDa	12	8225342	10183940	9538912	10155720	10241660	9798184	1.08041	0.322257
802	P62195	26S proteasome regulatory subunit 8	PSMC5	46 kDa	15	149857700	139795900	153304000	152465700	169570400	163110300	1.09524	0.0966873
803	Q9H078	Caseinolytic peptidase B protein homolog	CLPB	79 kDa	11	11908400	15589540	15923650	16820800	17631790	14810290	1.13453	0.283827
804	Q9UKV3	Apoptotic chromatin condensation inducer in the nucleus	ACIN1	152 kDa	14	35847680	43864940	38205060	42279480	40162290	44348870	1.07525	0.349339
805	Q9BTC0	Death-inducer obliterator 1	DIDO1	244 kDa	10	6667085	7988765	8180787	8135990	8839114	8464370	1.11398	0.201936
806	P11362	Fibroblast growth factor receptor 1	FGFR1	92 kDa	9	16259150	18944240	12809640	15949600	13644220	16679640	0.963769	0.790528
807	Q14C86	GTPase-activating protein and VPS9 domain-containing protein 1	GAPVD1	165 kDa	24	17360780	19962840	20902190	19935750	21788070	18414730	1.03285	0.680949
808	Q16563	Synaptophysin-like protein 1	SYPL1	29 kDa	3	9323823	12677820	22785040	10545510	9140921	11950350	0.706388	0.392265
809	Q9NUU7	ATP-dependent RNA helicase DDX19A	DDX19A	54 kDa	12	10845800	13138870	13407770	14428740	16923210	11969350	1.15856	0.311594
810	Q9BVJ6	U3 small nucleolar RNA-associated protein 14 homolog A	UTP14A	88 kDa	14	15344670	12989290	17031570	13248000	16428110	16484850	1.01753	0.875474
811	Q92890	Ubiquitin recognition factor in ER-associated degradation protein 1	UFD1	35 kDa	9	10907220	14622440	12186720	11164150	12281410	12829470	0.961785	0.716518
812	P55263	Adenosine kinase	ADK	41 kDa	8	14058340	14090230	16345310	13860910	12510790	18112840	0.99979	0.998771
813	P07954	Fumarate hydratase, mitochondrial	FH	55 kDa	10	54043530	54752840	75565910	75038590	84239660	80117000	1.2985	0.107995
814	Q9NWT1	p21-activated protein kinase-interacting protein 1	PAK1IP1	44 kDa	11	20860810	25609490	33080810	28318100	32580630	28958480	1.12955	0.442804
815	P00558	Phosphoglycerate kinase 1	PGK1	45 kDa	18	298215500	392418100	568780600	335663200	474047900	386308300	0.949663	0.827748
816	P53365	Arfaptin-2	ARFIP2	38 kDa	6	6174831	7647427	7782874	6715566	6995897	7571831	0.985104	0.863859
817	Q99459	Cell division cycle 5-like protein	CDC5L	92 kDa	17	58724570	73594140	76780860	66628110	75060020	74223690	1.03258	0.738488
818	Q8TBX8	Phosphatidylinositol 5-phosphate 4-kinase type-2 gamma	PIP4K2C	47 kDa	3	130850	239152	408366	302197	308583	376542	1.26845	0.483743
819	O00151	PDZ and LIM domain protein 1	PDLIM1	36 kDa	10	3584992	4304995	4726971	4587678	4359242	3486119	0.985423	0.903147
820	P54578	Ubiquitin carboxyl-terminal hydrolase 14	USP14	56 kDa	13	20689010	24311640	26636900	25977080	29945250	20627740	1.06857	0.640869
821	P46060	Ran GTPase-activating protein 1	RANGAP1	64 kDa	19	84726270	89962100	52520900	91080410	89134940	90332880	1.19074	0.342437
822	P23526	Adenosylhomocysteinase	AHCY	48 kDa	16	287040400	293607200	330853800	222941700	260379300	301147200	0.860633	0.198884
823	P17655	Calpain-2 catalytic subunit	CAPN2	80 kDa	16	41662130	41726030	48307310	49699500	54392850	46213690	1.14132	0.128124
824	P08237	ATP-dependent 6-phosphofructokinase, muscle type	PFKM	85 kDa	19	15581790	16394340	24440580	21600230	24734220	21307910	1.19898	0.31744
825	Q13435	Splicing factor 3B subunit 2	SF3B2	100 kDa	18	80094660	87512770	81901780	95199430	92060270	95728640	1.13418	0.0214068
826	P30622	CAP-Gly domain-containing linker protein 1	CLIP1	162 kDa	38	34353550	40236350	46160840	39230310	46948150	38532430	1.0328	0.777236
827	Q9H6T3	RNA polymerase II-associated protein 3	RPAP3	76 kDa	10	15408060	17658020	19172700	14837250	20249600	16040970	0.978733	0.861446
828	Q9UBK8	Methionine synthase reductase	MTRR	78 kDa	9	5856121	6828433	7563414	7698734	8925775	7602554	1.19652	0.113443
829	Q9NTM9	Copper homeostasis protein cutC homolog	CUTC	29 kDa	6	45706040	42208700	48075350	45503250	49344820	47987590	1.05034	0.335178
830	O15479	Melanoma-associated antigen B2	MAGEB2	35 kDa	6	10476280	14273220	15532160	14972520	16102220	16282580	1.17565	0.257384
831	P00488	Coagulation factor XIII A chain	F13A1	83 kDa	5	110596700	92921920	65592110	74864380	81265440	82008590	0.884909	0.514418
832	Q14204	Cytoplasmic dynein 1 heavy chain 1	DYNC1H1	532 kDa	105	16263090	18403650	26578970	28256910	29651840	30796920	1.44836	0.0934931
833	P11387	DNA topoisomerase 1	TOP1	91 kDa	21	96660080	106486600	130035300	112174500	127996100	123561400	1.09169	0.424581
834	Q96AG4	Leucine-rich repeat-containing protein 59	LRRC59	35 kDa	9	100544100	126545900	95810450	111749500	128080800	129884100	1.14498	0.248977
835	P37198	Nuclear pore glycoprotein p62	NUP62	53 kDa	6	7001668	9150802	9317427	7735957	7814358	7788396	0.916325	0.441329
836	Q8NFH4	Nucleoporin Nup37	NUP37	37 kDa	6	6388409	9332569	12054250	7438800	10104960	9067381	0.958089	0.844693
837	O75643	U5 small nuclear ribonucleoprotein 200 kDa helicase	SNRNP200	245 kDa	61	128949700	158192300	172586600	189647600	200737100	202739400	1.29016	0.0629158
838	O75608	Acyl-protein thioesterase 1	LYPLA1	25 kDa	5	14181290	16141220	22532820	15830730	20238730	17535050	1.01417	0.935278
839	Q99623	Prohibitin-2	PHB2	33 kDa	10	3543382	3322101	16055600	18661330	6150965	21203050	2.00756	0.287656
840	Q9P2E9	Ribosome-binding protein 1	RRBP1	152 kDa	25	20087910	18836870	16930180	16601880	18356270	15614380	0.905426	0.223317
841	P36954	DNA-directed RNA polymerase II subunit RPB9	POLR2I	15 kDa	2	279728	354566	228936	489896	232808	199808	1.06867	0.855816
842	Q9BQ67	Glutamate-rich WD repeat-containing protein 1	GRWD1	49 kDa	7	11305840	11927030	11153090	10964960	15190660	11966300	1.10865	0.432547
843	P08236	Beta-glucuronidase	GUSB	75 kDa	8	12269670	8153911	8740301	10151090	9100874	9061738	0.970848	0.849091
844	P47712	Cytosolic phospholipase A2	PLA2G4A	85 kDa	13	4931460	7004420	5600996	4612837	5319118	4317089	0.812519	0.208253
845	P32321	Deoxycytidylate deaminase	DCTD	20 kDa	3	1661316	2164332	1543290	1882450	3684881	2054163	1.41955	0.320818
846	O14776	Transcription elongation regulator 1	TCERG1	124 kDa	21	66400990	78245410	84177710	78286650	90198290	80564580	1.08839	0.356352
847	Q86Y46	Keratin, type II cytoskeletal 73	KRT73	59 kDa	4	89342560	4309691	2001119	111105400	12606560	11651550	1.41515	0.777597
848	Q92769	Histone deacetylase 2	HDAC2	55 kDa	14	28922540	30001590	35674360	37270630	44361870	37599940	1.26041	0.0585686
849	Q15717	ELAV-like protein 1	ELAVL1	36 kDa	10	71119200	92703440	95070430	90764650	94808690	85706620	1.04785	0.650731
850	Q9BSH4	Translational activator of cytochrome c oxidase 1	TACO1	32 kDa	5	10086790	10290450	15151520	12154850	14487170	12162410	1.0922	0.594621
851	P18615	Negative elongation factor E	NELFE	43 kDa	9	24491190	25684850	22676080	26506320	28548610	24940050	1.09805	0.157694
852	P00367	Glutamate dehydrogenase 1, mitochondrial	GLUD1	61 kDa	14	5899431	5245324	8453309	7784386	6460548	6798830	1.07377	0.683063
853	P35579	Myosin-9	MYH9	227 kDa	67	20346590	22433020	38463360	33880600	36854750	28923400	1.22668	0.402314
854	Q99988	Growth/differentiation factor 15	GDF15	34 kDa	8	120936000	136953100	167392800	161060600	194558000	144494700	1.17596	0.282003
855	P11172	Uridine 5'-monophosphate synthase	UMPS	52 kDa	11	27251800	11702940	20638250	21194160	11369900	12475870	0.755792	0.431324
856	O75629	Protein CREG1	CREG1	24 kDa	4	4548048	4152448	3236517	5036462	5099954	5017128	1.26946	0.1094
857	O75909	Cyclin-K	CCNK	64 kDa	7	2345371	3106695	4292808	7051482	5829217	3828522	1.71467	0.116757
858	Q09666	Neuroblast differentiation-associated protein AHNAK	AHNAK	629 kDa	83	121456600	148512300	147597100	125533200	127339300	122555100	0.899086	0.252454
859	Q96MX6	WD repeat-containing protein 92	WDR92	40 kDa	6	14794690	14052160	19104080	16855800	18579780	16262040	1.07814	0.524942
860	Q9Y2T3	Guanine deaminase	GDA	51 kDa	12	10325520	15722420	22315060	18244190	22194010	15382080	1.15419	0.575175
861	Q9BRK5	45 kDa calcium-binding protein	SDF4	42 kDa	9	18432690	17160460	13933730	14497750	14512360	14764360	0.883853	0.288244
862	Q13206	Probable ATP-dependent RNA helicase DDX10	DDX10	101 kDa	2	883842	1074555	1017136	747510	1251432	937392	0.986826	0.93986
863	Q6UX04	Spliceosome-associated protein CWC27 homolog	CWC27	54 kDa	7	24363720	28361660	30084420	26672520	28043520	28467290	1.00451	0.949597
864	O43252	Bifunctional 3'-phosphoadenosine 5'-phosphosulfate synthase 1	PAPSS1	71 kDa	17	9030590	12810550	13762620	11633540	13929920	15212380	1.14527	0.393581
865	P20700	Lamin-B1	LMNB1	66 kDa	28	122729800	141329000	155250300	129442700	123267100	127059100	0.905702	0.295275
866	P55884	Eukaryotic translation initiation factor 3 subunit B	EIF3B	92 kDa	24	34058280	40846650	44069760	49761850	52762840	51340450	1.29326	0.0491921
867	Q96GX9	Methylthioribulose-1-phosphate dehydratase	APIP	27 kDa	7	28509460	30432050	33180660	30014640	33671150	30394980	1.02126	0.733416
868	Q13093	Platelet-activating factor acetylhydrolase	PLA2G7	50 kDa	1	19791740	17597650	16812480	16411490	19088640	20256670	1.02869	0.739068
869	O00291	Huntingtin-interacting protein 1	HIP1	116 kDa	3	986156	1277500	1624071	1296010	1292158	1275361	0.993776	0.969091
870	Q9UHX1	Poly(U)-binding-splicing factor PUF60	PUF60	60 kDa	11	4453947	5338121	7798245	6812841	6736406	6593502	1.1451	0.484827
871	Q13867	Bleomycin hydrolase	BLMH	53 kDa	13	146175300	192205500	216144600	187608900	203104800	190602000	1.04831	0.709405
872	Q9Y2Q3	Glutathione S-transferase kappa 1	GSTK1	25 kDa	3	5985521	5542689	6755256	7127617	5803596	6112376	1.04157	0.660396
873	P06493	Cyclin-dependent kinase 1	CDK1	34 kDa	9	12225130	11649370	13689870	12857180	11155250	13112570	0.988304	0.873608
874	P61221	ATP-binding cassette sub-family E member 1	ABCE1	67 kDa	17	47938460	42736860	56508690	55357130	53532930	52492590	1.09647	0.359583
875	Q8WTT2	Nucleolar complex protein 3 homolog	NOC3L	93 kDa	7	7977922	9750739	18044910	14605340	10992170	9452794	0.979782	0.948924
876	Q8NHP1	Aflatoxin B1 aldehyde reductase member 4	AKR7L	37 kDa	3	11121540	9907608	8582019	8910392	8794729	9142286	0.906665	0.335431
877	O60763	General vesicular transport factor p115	USO1	108 kDa	22	20829820	17911610	19342380	21751400	20394370	16511090	1.00987	0.921271
878	O75339	Cartilage intermediate layer protein 1	CILP	133 kDa	10	100580700	83796040	65969270	78712080	80214880	75348770	0.935808	0.646866
879	O00743	Serine/threonine-protein phosphatase 6 catalytic subunit	PPP6C	35 kDa	6	5307147	5777859	5593898	6376825	4802649	4983052	0.96904	0.766643
880	O14763	Tumor necrosis factor receptor superfamily member 10B	TNFRSF10B	48 kDa	5	1122998	976839	1684736	1173823	1665497	1772332	1.21854	0.387537
881	P51003	Poly(A) polymerase alpha	PAPOLA	83 kDa	19	34987880	38070810	46924290	41655220	47035650	42395880	1.09254	0.421674
882	P25205	DNA replication licensing factor MCM3	MCM3	91 kDa	28	125542000	140464300	150841900	159769900	214725900	150336700	1.25905	0.207624
883	Q9BQG0	Myb-binding protein 1A	MYBBP1A	149 kDa	19	18044830	21647100	23432530	26978770	33530110	28361160	1.40785	0.030271
884	Q92522	Histone H1.10	H1-10	22 kDa	5	91794710	121687300	135595700	118544700	134929800	111487200	1.0455	0.741588
885	Q8NFW8	N-acylneuraminate cytidylyltransferase	CMAS	48 kDa	7	5933385	5373426	8008648	7849916	7681349	7555911	1.19527	0.256502
886	Q09161	Nuclear cap-binding protein subunit 1	NCBP1	92 kDa	15	24711470	19295460	23357450	31781150	27662270	28795890	1.30988	0.0301869
887	P36952	Serpin B5	SERPINB5	42 kDa	9	9540567	13398870	15992540	11273200	13802310	11649440	0.943311	0.744053
888	Q96AB3	Isochorismatase domain-containing protein 2	ISOC2	22 kDa	2	691368	796214	1056620	1033116	988135	1032177	1.20015	0.257152
889	Q96GQ7	Probable ATP-dependent RNA helicase DDX27	DDX27	90 kDa	15	26938220	28366450	34366600	33366170	35157130	32469390	1.12625	0.233768
890	Q14CX7	N-alpha-acetyltransferase 25, NatB auxiliary subunit	NAA25	112 kDa	16	18590470	21809540	27247820	34091430	35280130	38002700	1.58725	0.0204193
891	P02452	Collagen alpha-1(I) chain	COL1A1	139 kDa	14	30558210	29552090	23570160	26306700	25080840	26564180	0.93154	0.475441
892	Q9NVM4	Protein arginine N-methyltransferase 7	PRMT7	78 kDa	8	7231416	7455488	7107682	6942982	8253441	9858756	1.14961	0.325915
893	Q6IN85	Serine/threonine-protein phosphatase 4 regulatory subunit 3A	PPP4R3A	95 kDa	17	20502760	25699070	27286590	26782620	31045910	28744940	1.17806	0.157676
894	Q96AZ6	Interferon-stimulated gene 20 kDa protein	ISG20	20 kDa	4	2190041	4339786	3296398	2352949	3901228	3512580	0.993948	0.980925
895	Q96FK6	WD repeat-containing protein 89	WDR89	43 kDa	7	4002538	5260377	5497711	4247863	5687663	4521356	0.979422	0.882056
896	P06865	Beta-hexosaminidase subunit alpha	HEXA	61 kDa	8	19568080	21766120	21469950	19776170	21506450	21433090	0.998592	0.975241
897	P04114	Apolipoprotein B-100	APOB	516 kDa	17	2957497000	2497057000	3173868000	2997518000	3036680000	3152661000	1.06472	0.451389
898	Q14657	EKC/KEOPS complex subunit LAGE3	LAGE3	15 kDa	3	4047095	4325525	5392481	4959108	4221802	4040378	0.960493	0.736057
899	Q9UBE0	SUMO-activating enzyme subunit 1	SAE1	38 kDa	9	20013210	18951210	22410940	21428590	30560960	20454870	1.18035	0.372045
900	Q9Y639	Neuroplastin	NPTN	44 kDa	6	7644346	9307856	10934820	8146761	8957987	9255343	0.945246	0.654378
901	Q9UKX7	Nuclear pore complex protein Nup50	NUP50	50 kDa	5	22445540	28579380	30423600	26581250	26207350	27944280	0.991214	0.93114
902	P42704	Leucine-rich PPR motif-containing protein, mitochondrial	LRPPRC	158 kDa	33	29407210	32173070	45254380	45985660	41667980	45792290	1.24909	0.205172
903	P11216	Glycogen phosphorylase, brain form	PYGB	97 kDa	23	12735310	13694050	16318310	15237520	16129520	16965610	1.13065	0.218548
904	P13489	Ribonuclease inhibitor	RNH1	50 kDa	8	25709900	38281520	46858130	40802590	40259110	37243760	1.06726	0.726831
905	Q4G0J3	La-related protein 7	LARP7	67 kDa	15	20079440	22789740	22542230	22134100	24141820	23746750	1.0705	0.228368
906	Q9HD34	LYR motif-containing protein 4	LYRM4	11 kDa	1	1582427	1395852	1494731	1334141	839924	1503992	0.822278	0.313553
907	Q9NR46	Endophilin-B2	SH3GLB2	44 kDa	10	3769233	4053428	4071515	3060787	3417692	4419905	0.916279	0.503215
908	Q86UP2	Kinectin	KTN1	156 kDa	46	82892400	104730000	101809400	96968660	108672700	98686000	1.05146	0.566908
909	P20936	Ras GTPase-activating protein 1	RASA1	116 kDa	12	22188600	20219480	17910510	19220210	18437390	18635040	0.933255	0.391449
910	Q13428	Treacle protein	TCOF1	152 kDa	21	49227670	53991760	57026070	56100130	65773920	57734010	1.12083	0.1658
911	P35237	Serpin B6	SERPINB6	43 kDa	13	39015230	49053990	54210350	49957950	50793670	52045300	1.07392	0.515152
912	P14324	Farnesyl pyrophosphate synthase	FDPS	48 kDa	4	3031027	4355257	4615329	3625574	4661910	4854424	1.09501	0.575736
913	Q15075	Early endosome antigen 1	EEA1	162 kDa	38	13725100	15841040	19309660	17914600	20509720	15628600	1.10592	0.468698
914	P49770	Translation initiation factor eIF-2B subunit beta	EIF2B2	39 kDa	9	20968120	23811260	23146370	24070260	24848240	25096130	1.08964	0.129892
915	P54577	Tyrosine--tRNA ligase, cytoplasmic	YARS1	59 kDa	23	98089050	112263800	119817100	128747900	140726100	129814500	1.20934	0.047313
916	P10321	HLA class I histocompatibility antigen, C alpha chain	HLA-C	41 kDa	5	2110777	1752181	1277677	1757423	1945608	1680925	1.04733	0.774795
917	Q99714	3-hydroxyacyl-CoA dehydrogenase type-2	HSD17B10	27 kDa	9	20717530	21565090	21411170	23534400	24644620	24660840	1.14359	0.00380496
918	Q9BWU0	Kanadaptin	SLC4A1AP	89 kDa	10	5343474	4619639	4790842	5733987	5842269	4995625	1.12322	0.155819
919	Q99848	Probable rRNA-processing protein EBP2	EBNA1BP2	35 kDa	6	48023330	52613650	57085150	51051530	58669790	48177220	1.00112	0.989211
920	Q13464	Rho-associated protein kinase 1	ROCK1	158 kDa	23	276377	196410	441456	428325	383996	647439	1.59669	0.171013
921	Q13155	Aminoacyl tRNA synthase complex-interacting multifunctional protein 2	AIMP2	35 kDa	4	7844945	9907728	10630360	12969480	11351810	13553690	1.33442	0.0436964
922	O60264	SWI/SNF-related matrix-associated actin-dependent regulator of chromatin subfamily A member 5	SMARCA5	122 kDa	23	38080260	43767230	45072250	55727120	54621760	49473340	1.25924	0.019474
923	Q9NPJ6	Mediator of RNA polymerase II transcription subunit 4	MED4	30 kDa	3	2336088	2749935	3681079	3627294	3318051	3019859	1.13666	0.43152
924	Q9HAU5	Regulator of nonsense transcripts 2	UPF2	148 kDa	19	16557350	19306760	18648980	20963950	23255570	20986540	1.19615	0.0342352
925	Q96HE7	ERO1-like protein alpha	ERO1A	54 kDa	11	14980490	18248420	27501860	26668040	20278860	26880190	1.21565	0.383422
926	Q96T23	Remodeling and spacing factor 1	RSF1	164 kDa	10	8986822	9120580	7397083	8208111	8819019	9119388	1.02517	0.751676
927	Q13011	Delta(3,5)-Delta(2,4)-dienoyl-CoA isomerase, mitochondrial	ECH1	36 kDa	9	90750000	130918700	148108800	98255480	120594500	129784000	0.942821	0.739713
928	Q9Y2Z4	Tyrosine--tRNA ligase, mitochondrial	YARS2	53 kDa	7	7065944	7602579	8710804	9316322	9978481	9348825	1.22517	0.0511574
929	Q8NDA2	Hemicentin-2	HMCN2	542 kDa	12	15820460	17051510	13200420	14696230	13422540	15131540	0.938747	0.509001
930	P05187	Alkaline phosphatase, placental type	ALPP	58 kDa	10	7150702	7910872	10942950	7786275	8550783	7690893	0.923991	0.630509
931	P00450	Ceruloplasmin	CP	122 kDa	9	113054400	118548100	103750300	99328780	94306090	97466180	0.868044	0.0635717
932	P04844	Dolichyl-diphosphooligosaccharide--protein glycosyltransferase subunit 2	RPN2	69 kDa	5	2948108	2737187	5528704	4745098	3335661	6366618	1.28833	0.438514
933	Q9UIG0	Tyrosine-protein kinase BAZ1B	BAZ1B	171 kDa	18	27052930	29802700	25697350	34704760	38626890	31081140	1.2648	0.0583066
934	P33316	Deoxyuridine 5'-triphosphate nucleotidohydrolase, mitochondrial	DUT	27 kDa	7	88032880	88968040	94617860	98265300	98881880	76831370	1.00869	0.925207
935	Q9H2M9	Rab3 GTPase-activating protein non-catalytic subunit	RAB3GAP2	156 kDa	16	4336200	5067274	6385576	7333361	6524970	5872598	1.24966	0.155797
936	O15372	Eukaryotic translation initiation factor 3 subunit H	EIF3H	40 kDa	12	67887670	75955540	67740920	82300940	79046990	79095520	1.1364	0.0559544
937	Q9NVS9	Pyridoxine-5'-phosphate oxidase	PNPO	30 kDa	7	6014587	5671680	7389372	8275609	9336146	6711682	1.2751	0.140756
938	Q9UNP9	Peptidyl-prolyl cis-trans isomerase E	PPIE	33 kDa	8	32368620	40480280	45014880	41778250	38470080	42030190	1.03746	0.735236
939	Q6UX71	Plexin domain-containing protein 2	PLXDC2	60 kDa	8	692775	12359300	1626911	31132410	48731790	5133296	5.79042	0.198918
940	Q9NS86	LanC-like protein 2	LANCL2	51 kDa	7	2500446	2154485	2141737	2632210	4528251	2550281	1.42875	0.269808
941	Q96TC7	Regulator of microtubule dynamics protein 3	RMDN3	52 kDa	7	15334170	21300090	21248640	20607190	23903570	20120640	1.11659	0.396333
942	Q9Y303	N-acetylglucosamine-6-phosphate deacetylase	AMDHD2	44 kDa	7	7001660	8324144	7535894	7426893	10064700	8794999	1.14981	0.274429
943	Q9NRX1	RNA-binding protein PNO1	PNO1	28 kDa	4	2913974	2786762	3724899	3028003	3544826	3838451	1.10457	0.435204
944	Q5SW79	Centrosomal protein of 170 kDa	CEP170	175 kDa	13	5848969	9189616	8436508	7691341	7082465	6923593	0.924273	0.620862
945	Q9H2J4	Phosducin-like protein 3	PDCL3	28 kDa	7	12760360	14648940	19693960	17187090	17994580	15915010	1.08478	0.591772
946	Q4J6C6	Prolyl endopeptidase-like	PREPL	84 kDa	14	18716820	14264260	15853800	18417420	16838780	17709030	1.08458	0.405617
947	O75530	Polycomb protein EED	EED	50 kDa	10	6319858	5190287	7178643	5844508	7543287	7641560	1.12524	0.395062
948	Q96SB4	SRSF protein kinase 1	SRPK1	74 kDa	11	12337500	14621880	16122250	15655650	15498320	16559040	1.1075	0.293712
949	Q01650	Large neutral amino acids transporter small subunit 1	SLC7A5	55 kDa	4	4657949	4043386	8522945	10873940	9285216	8198699	1.64639	0.100086
950	P34932	Heat shock 70 kDa protein 4	HSPA4	94 kDa	29	115576100	138582200	137155000	154403700	180023900	145560000	1.22661	0.0876617
951	P56192	Methionine--tRNA ligase, cytoplasmic	MARS1	101 kDa	18	31273110	32838600	45969260	43076470	51532530	43069660	1.2507	0.181658
952	Q9UKG1	DCC-interacting protein 13-alpha	APPL1	80 kDa	16	5729846	6511608	8328450	6339693	7181355	9650154	1.12646	0.530368
953	Q969S3	Zinc finger protein 622	ZNF622	54 kDa	8	14862800	15956710	9860174	16123220	17008450	16659700	1.22399	0.245573
954	O94915	Protein furry homolog-like	FRYL	340 kDa	23	8875193	10154050	13638360	11667160	12975020	12732820	1.1441	0.38663
955	P50583	Bis(5'-nucleosyl)-tetraphosphatase [asymmetrical]	NUDT2	17 kDa	4	2647261	4598637	4750974	2944262	4244800	3742174	0.911174	0.676947
956	Q86TU7	Actin-histidine N-methyltransferase	SETD3	67 kDa	15	32804470	41241640	50991760	50024910	50767970	44917220	1.16533	0.320005
957	Q9UHD8	Septin-9	SEPTIN9	65 kDa	20	29372010	32594300	35156310	26044450	27420540	26625700	0.824635	0.0698322
958	P00505	Aspartate aminotransferase, mitochondrial	GOT2	48 kDa	8	60061930	43993670	71827910	59857450	50286710	54460020	0.93587	0.695074
959	P98175	RNA-binding protein 10	RBM10	104 kDa	14	37790870	36755870	44972150	36740420	38611960	45862980	1.01419	0.88884
960	O76003	Glutaredoxin-3	GLRX3	37 kDa	9	99696770	130298600	123375900	108124300	111006700	118104500	0.954338	0.627464
961	P62424	60S ribosomal protein L7a	RPL7A	30 kDa	7	76927770	89483040	96305410	105368300	85916540	107768900	1.13831	0.249828
962	P07711	Cathepsin L1	CTSL	38 kDa	6	22415610	26403990	21906780	23390270	21022400	25313890	0.985864	0.868563
963	O95084	Serine protease 23	PRSS23	43 kDa	4	707443	1450438	731250	820634	675065	924316	0.837627	0.592919
964	Q8TAT6	Nuclear protein localization protein 4 homolog	NPLOC4	68 kDa	16	28919300	26392650	31535610	26609510	31568620	27349880	0.984806	0.847372
965	Q4G0N4	NAD kinase 2, mitochondrial	NADK2	49 kDa	11	6207712	5867391	7700205	8418594	9475988	8446342	1.33201	0.0389627
966	P49257	Protein ERGIC-53	LMAN1	58 kDa	8	66021150	65230650	50369430	57876680	50526790	54732100	0.898219	0.354181
967	Q9BZK7	F-box-like/WD repeat-containing protein TBL1XR1	TBL1XR1	56 kDa	6	4381112	4810830	4230293	4007041	5134485	3975746	0.977279	0.824965
968	Q8WWQ8	Stabilin-2	STAB2	277 kDa	5	2154270	1774776	882392	1936087	1699467	984005	0.96012	0.89948
969	O75348	V-type proton ATPase subunit G 1	ATP6V1G1	14 kDa	3	28805130	25890950	31166030	31601430	27471320	24103900	0.968724	0.75442
970	Q9P2R3	Rabankyrin-5	ANKFY1	128 kDa	14	10322960	10547740	13869640	12716570	11989910	10387190	1.01017	0.93493
971	Q99615	DnaJ homolog subfamily C member 7	DNAJC7	56 kDa	16	45294150	51368700	55524170	55405110	58884560	53022550	1.09939	0.232124
972	P19971	Thymidine phosphorylase	TYMP	50 kDa	10	13474470	14377340	20353180	15014560	19841240	13276650	0.998495	0.993788
973	Q93096	Protein tyrosine phosphatase type IVA 1	PTP4A1	20 kDa	5	405651	266720	220241	253882	459140	439870	1.29159	0.371164
974	Q8IWX8	Calcium homeostasis endoplasmic reticulum protein	CHERP	104 kDa	6	7550380	7791022	10202790	8920749	10248350	9655570	1.12842	0.330166
975	Q9NV56	MRG/MORF4L-binding protein	MRGBP	22 kDa	3	2091252	3473934	4220481	3384680	2812959	3498546	0.990856	0.967309
976	P04004	Vitronectin	VTN	54 kDa	6	7333055	5666750	6170799	5720197	6076016	5188293	0.885966	0.281334
977	P48634	Protein PRRC2A	PRRC2A	229 kDa	18	18585700	21015780	23390550	20991660	21609790	19636390	0.988027	0.879073
978	Q9Y2X3	Nucleolar protein 58	NOP58	60 kDa	16	52265200	43232460	59233740	58706060	60878360	59876310	1.15982	0.215403
979	P14314	Glucosidase 2 subunit beta	PRKCSH	59 kDa	7	111259800	133469300	162944600	136186600	110597400	135106200	0.936755	0.649224
980	P11498	Pyruvate carboxylase, mitochondrial	PC	130 kDa	13	5783539	5115640	7976372	7775469	8248005	8681053	1.30881	0.144388
981	P07737	Profilin-1	PFN1	15 kDa	7	54318730	69081110	77790810	70740020	66760650	59939660	0.981359	0.879539
982	P23258	Tubulin gamma-1 chain	TUBG1	51 kDa	10	22614490	22743100	30751410	25611380	26445500	25631720	1.02075	0.863326
983	P41236	Protein phosphatase inhibitor 2	PPP1R2	23 kDa	4	9333328	11484380	8370712	5956466	6402263	6547145	0.647718	0.0603548
984	Q86VM9	Zinc finger CCCH domain-containing protein 18	ZC3H18	106 kDa	9	5458142	7133051	6679827	5220297	6127374	6983027	0.951205	0.68317
985	E9PRG8	Uncharacterized protein C11orf98	C11orf98	14 kDa	2	2979717	1626304	1626609	2014715	738322	1296890	0.649794	0.282586
986	Q9UJU6	Drebrin-like protein	DBNL	48 kDa	13	17349150	17737160	18090800	11991830	14442590	18755640	0.849803	0.309944
987	Q13619	Cullin-4A	CUL4A	88 kDa	29	12092210	11331900	18116020	16163030	21081300	17576650	1.31971	0.172913
988	P35052	Glypican-1	GPC1	62 kDa	11	26546800	20487910	15800170	17014430	12864480	18480740	0.769631	0.263639
989	Q96EI5	Transcription elongation factor A protein-like 4	TCEAL4	25 kDa	10	12875420	15850860	14315720	14483560	14104600	15267560	1.01891	0.790964
990	P28070	Proteasome subunit beta type-4	PSMB4	29 kDa	6	8025681	8774330	8599053	9886418	10311320	9971559	1.18781	0.00739818
991	Q13144	Translation initiation factor eIF-2B subunit epsilon	EIF2B5	80 kDa	8	9299255	8896052	8316772	12565650	11712080	11777770	1.35997	0.0013066
992	Q04637	Eukaryotic translation initiation factor 4 gamma 1	EIF4G1	175 kDa	27	47642470	48366700	51054280	48686810	65509990	46847020	1.09506	0.516285
993	Q9BUF5	Tubulin beta-6 chain	TUBB6	50 kDa	15	8326064	5890810	7228114	8842919	7371237	8822186	1.16747	0.242912
994	P29144	Tripeptidyl-peptidase 2	TPP2	138 kDa	30	35554440	54842730	64129990	63268150	60991690	59996740	1.19239	0.359965
995	Q5TDH0	Protein DDI1 homolog 2	DDI2	45 kDa	6	5888178	7985661	6108404	5906943	6203481	6704493	0.941582	0.626738
996	Q14011	Cold-inducible RNA-binding protein	CIRBP	19 kDa	2	12375650	15385090	9855130	14301580	14709960	12182870	1.09513	0.552134
997	P00738	Haptoglobin	HP	45 kDa	10	132080600	112505100	122008600	124751700	136585500	118902900	1.03722	0.585771
998	Q9NWH9	SAFB-like transcription modulator	SLTM	117 kDa	16	14080460	24394740	21001620	16024760	16937430	17033270	0.840587	0.407164
999	P56199	Integrin alpha-1	ITGA1	131 kDa	12	19501460	16718290	23895170	18835030	15086810	21061590	0.914639	0.564723
1000	Q9HC35	Echinoderm microtubule-associated protein-like 4	EML4	109 kDa	16	48899600	46444570	46435240	50007280	53469250	48650950	1.07299	0.122894
1001	O14745	Na(+)/H(+) exchange regulatory cofactor NHE-RF1	SLC9A3R1	39 kDa	9	26099590	31057810	31350150	28626640	30082170	23446740	0.928232	0.468246
1002	P54709	Sodium/potassium-transporting ATPase subunit beta-3	ATP1B3	32 kDa	2	4961069	3508540	5951354	5230613	4786919	4388209	0.998944	0.995111
1003	P36871	Phosphoglucomutase-1	PGM1	61 kDa	21	9954866	14978130	21476600	14254350	19255040	15840990	1.06337	0.806949
1004	Q86U44	N6-adenosine-methyltransferase catalytic subunit	METTL3	64 kDa	13	21348370	23022610	25497380	22048620	24568490	23232630	0.999733	0.996737
1005	P09914	Interferon-induced protein with tetratricopeptide repeats 1	IFIT1	55 kDa	7	3819244	3840264	4594862	3511839	4649029	4655695	1.04588	0.706116
1006	Q9Y617	Phosphoserine aminotransferase	PSAT1	40 kDa	11	139794400	150014800	143882100	149245300	148051900	130980800	0.987518	0.80269
1007	O14617	AP-3 complex subunit delta-1	AP3D1	130 kDa	17	13578790	14408840	15837030	18324920	18180700	16278150	1.20443	0.0328408
1008	Q13416	Origin recognition complex subunit 2	ORC2	66 kDa	7	5900817	5952079	6401680	4002349	3772474	4997869	0.699698	0.0260302
1009	Q9BXJ9	N-alpha-acetyltransferase 15, NatA auxiliary subunit	NAA15	101 kDa	28	85158830	82849730	102240900	102683200	121709200	114826800	1.25521	0.0502599
1010	P05231	Interleukin-6	IL6	24 kDa	4	12766290	13289710	11315130	26059130	29340040	25215030	2.15713	0.00241745
1011	Q02880	DNA topoisomerase 2-beta	TOP2B	183 kDa	25	32812860	30127750	26253170	31746970	17417730	18433120	0.757876	0.255966
1012	Q00839	Heterogeneous nuclear ribonucleoprotein U	HNRNPU	91 kDa	12	169830900	195849500	221474400	195115500	207984200	213980300	1.05097	0.582389
1013	Q9Y312	Protein AAR2 homolog	AAR2	43 kDa	3	3405854	3072407	3736315	5045827	3806108	3480474	1.20733	0.274938
1014	Q8N163	Cell cycle and apoptosis regulator protein 2	CCAR2	103 kDa	15	38074910	39615840	57247210	49650190	46153290	50935860	1.08746	0.591356
1015	O75717	WD repeat and HMG-box DNA-binding protein 1	WDHD1	126 kDa	19	28956100	31471170	32341940	32849810	33607440	31861300	1.05982	0.203364
1016	Q9H3P7	Golgi resident protein GCP60	ACBD3	61 kDa	9	5843950	6092791	6063800	4212028	5328342	6482995	0.89016	0.42085
1017	Q8N8A6	ATP-dependent RNA helicase DDX51	DDX51	72 kDa	3	6793659	5596392	7316833	5975770	8473325	9459345	1.2132	0.314427
1018	Q15057	Arf-GAP with coiled-coil, ANK repeat and PH domain-containing protein 2	ACAP2	88 kDa	19	11492580	10469540	11048820	13043480	13812400	11996690	1.17696	0.0451502
1019	P05388	60S acidic ribosomal protein P0	RPLP0	34 kDa	8	1737430000	1825048000	2152348000	2018253000	2063819000	2010030000	1.06602	0.424502
1020	Q86X76	Deaminated glutathione amidase	NIT1	36 kDa	8	10086990	12897730	15131000	12824790	14902730	10005720	0.989965	0.953063
1021	Q8TEQ6	Gem-associated protein 5	GEMIN5	169 kDa	28	45243750	50004260	62916940	51170890	63039740	53428580	1.0599	0.651237
1022	O95782	AP-2 complex subunit alpha-1	AP2A1	108 kDa	19	134406	216529	290752	146569	219726	263856	0.98202	0.949354
1023	O14879	Interferon-induced protein with tetratricopeptide repeats 3	IFIT3	56 kDa	4	4444036	4353603	6525715	4167100	4712777	4500712	0.873215	0.459595
1024	O95633	Follistatin-related protein 3	FSTL3	28 kDa	4	1060434	1538588	1499229	1688596	1147389	912221	0.914587	0.697488
1025	O00461	Golgi integral membrane protein 4	GOLIM4	82 kDa	11	1549657	1384187	2161079	1407483	1099304	1511729	0.788729	0.270634
1026	P23921	Ribonucleoside-diphosphate reductase large subunit	RRM1	90 kDa	16	1259579	1638873	2309230	2155737	1840711	2501341	1.24773	0.311553
1027	Q53FA7	Quinone oxidoreductase PIG3	TP53I3	36 kDa	8	28469860	30302880	40502240	30826250	33472210	33767810	0.987825	0.925407
1028	P55786	Puromycin-sensitive aminopeptidase	NPEPPS	103 kDa	33	38800100	39106500	52622720	50021670	54559850	53905510	1.21419	0.169219
1029	Q8N4Q1	Mitochondrial intermembrane space import and assembly protein 40	CHCHD4	16 kDa	5	5190623	8532889	5287889	6575110	5543200	11630940	1.24921	0.517525
1030	Q16630	Cleavage and polyadenylation specificity factor subunit 6	CPSF6	59 kDa	9	66468900	74357380	86239100	79784040	87303560	77284520	1.07622	0.438924
1031	Q9UL15	BAG family molecular chaperone regulator 5	BAG5	51 kDa	4	2822476	3984189	5077415	4161467	5194380	4751626	1.18709	0.381679
1032	O95260	Arginyl-tRNA--protein transferase 1	ATE1	59 kDa	5	3967792	3390710	3608988	4542812	6081870	4077397	1.34051	0.168981
1033	Q96KB5	Lymphokine-activated killer T-cell-originated protein kinase	PBK	36 kDa	7	17270950	20753690	19966940	20253690	20763260	19521920	1.04393	0.512402
1034	P02533	Keratin, type I cytoskeletal 14	KRT14	52 kDa	17	39297820	9485512	21827210	5831797	32035320	6078632	0.622368	0.508693
1035	Q14181	DNA polymerase alpha subunit B	POLA2	66 kDa	13	20347170	23760940	25377260	22902850	26339240	23348550	1.04469	0.605245
1036	P09234	U1 small nuclear ribonucleoprotein C	SNRPC	17 kDa	2	27200890	48566090	37575270	34527610	41266780	31850210	0.949731	0.798697
1037	Q14008	Cytoskeleton-associated protein 5	CKAP5	226 kDa	48	25435390	31524880	32937650	34461750	33379070	34055180	1.13346	0.222764
1038	Q9UEE9	Craniofacial development protein 1	CFDP1	34 kDa	6	28666460	29789580	23204080	30890280	30513320	31088070	1.13264	0.217209
1039	P78527	DNA-dependent protein kinase catalytic subunit	PRKDC	469 kDa	58	24399000	23702570	43602280	40642520	32582780	37982380	1.21268	0.429574
1040	P09132	Signal recognition particle 19 kDa protein	SRP19	16 kDa	3	8863829	9789281	11568400	10139240	10546100	9937721	1.01329	0.883189
1041	P07355	Annexin A2	ANXA2	39 kDa	19	41862370	48180720	68231790	62709760	47700360	40242270	0.95184	0.818302
1042	Q13123	Protein Red	IK	66 kDa	8	11800850	12923920	11261880	10212530	12309910	13264870	0.994461	0.952324
1043	Q676U5	Autophagy-related protein 16-1	ATG16L1	68 kDa	11	6283230	6945605	7312600	5360451	6424282	6053802	0.868417	0.106309
1044	Q93052	Lipoma-preferred partner	LPP	66 kDa	5	1500608	1951635	1997622	2401403	1556936	2019966	1.09696	0.582835
1045	Q9NZL4	Hsp70-binding protein 1	HSPBP1	39 kDa	8	10696950	11520000	10712720	9500970	9199792	8066841	0.812872	0.02288
1046	P16989	Y-box-binding protein 3	YBX3	40 kDa	8	25235330	27472340	31231590	26432610	28692310	27608990	0.98564	0.845679
1047	P16070	CD44 antigen	CD44	82 kDa	6	15327340	16250470	18971740	16601110	18714970	18911080	1.07275	0.41248
1048	Q9BUJ2	Heterogeneous nuclear ribonucleoprotein U-like protein 1	HNRNPUL1	96 kDa	10	33726090	40739920	44676510	46520870	51347840	39741840	1.15501	0.255962
1049	O00592	Podocalyxin	PODXL	59 kDa	2	887878	1438438	2703680	1510521	1485482	1678146	0.929255	0.84633
1050	Q92900	Regulator of nonsense transcripts 1	UPF1	124 kDa	28	87735880	85220370	84609880	82287660	88952800	92021360	1.02211	0.584393
1051	Q9UKY7	Protein CDV3 homolog	CDV3	27 kDa	4	2015473	1896874	1519543	1329565	1743872	1880961	0.912095	0.5156
1052	P32320	Cytidine deaminase	CDA	16 kDa	2	8419278	9953631	10413770	8060501	9472420	8738574	0.912627	0.321693
1053	Q8N1G4	Leucine-rich repeat-containing protein 47	LRRC47	63 kDa	13	38696210	44295530	52619370	43958610	52436720	48261350	1.0667	0.565243
1054	O94842	TOX high mobility group box family member 4	TOX4	66 kDa	6	10312930	12492230	12019240	11565150	12135820	13080030	1.05618	0.464721
1055	P04179	Superoxide dismutase [Mn], mitochondrial	SOD2	25 kDa	3	9763916	8472618	11845260	11872840	8097055	10409120	1.00988	0.949682
1056	Q9Y4X5	E3 ubiquitin-protein ligase ARIH1	ARIH1	64 kDa	8	13068070	14732400	13604590	16476050	16501990	13330730	1.11843	0.259168
1057	P31150	Rab GDP dissociation inhibitor alpha	GDI1	51 kDa	19	43357190	58438340	56230120	61449710	70640210	63723740	1.23913	0.0977244
1058	O94874	E3 UFM1-protein ligase 1	UFL1	90 kDa	17	16209680	16322200	17504020	21427770	23932640	18682100	1.27993	0.0821965
1059	P78417	Glutathione S-transferase omega-1	GSTO1	28 kDa	8	30140620	37091670	51832650	35001290	34636850	37756320	0.901982	0.606328
1060	Q9BQC3	2-(3-amino-3-carboxypropyl)histidine synthase subunit 2	DPH2	52 kDa	7	4567143	5517806	5689137	5858585	5039333	5128468	1.01599	0.856818
1061	P12429	Annexin A3	ANXA3	36 kDa	9	2994242	3310177	11206550	5637112	3988955	5024195	0.836633	0.75835
1062	Q9NT62	Ubiquitin-like-conjugating enzyme ATG3	ATG3	36 kDa	7	66545130	67905270	72652070	65514160	66101300	65362990	0.951116	0.208411
1063	P13798	Acylamino-acid-releasing enzyme	APEH	81 kDa	10	68555820	88120690	103742300	82880030	85936350	86453550	0.980228	0.881982
1064	Q9NYL9	Tropomodulin-3	TMOD3	40 kDa	12	17698240	25927470	25466720	14069320	23629010	16651730	0.786628	0.277371
1065	P49590	Histidine--tRNA ligase, mitochondrial	HARS2	57 kDa	13	28383810	19512110	30910000	32813400	21706640	19361830	0.937517	0.776772
1066	Q9Y232	Chromodomain Y-like protein	CDYL	66 kDa	4	3901472	3934203	5760661	5613888	8081725	6924452	1.51659	0.0689989
1067	Q9NR30	Nucleolar RNA helicase 2	DDX21	87 kDa	25	179826700	207423700	212096400	208041800	217008300	222129500	1.07981	0.250303
1068	Q7L5D6	Golgi to ER traffic protein 4 homolog	GET4	37 kDa	10	11445740	12579470	14354460	11554290	13509120	14302770	1.0257	0.793681
1069	Q16851	UTP--glucose-1-phosphate uridylyltransferase	UGP2	57 kDa	18	7703004	7374005	10331250	7912575	8755833	10484990	1.06868	0.655202
1070	O60885	Bromodomain-containing protein 4	BRD4	152 kDa	10	6914447	7855081	8240746	7320256	7887758	7535257	0.988396	0.849758
1071	P51948	CDK-activating kinase assembly factor MAT1	MNAT1	36 kDa	5	3519092	5208875	5796591	5121176	4520388	5281947	1.02747	0.867795
1072	Q8N3X1	Formin-binding protein 4	FNBP4	110 kDa	14	31193690	32352560	26287790	28431340	30343500	30839320	0.997552	0.973366
1073	Q9BW91	ADP-ribose pyrophosphatase, mitochondrial	NUDT9	39 kDa	3	843076	1135125	1045766	1234260	753359	460344	0.80952	0.493432
1074	O60504	Vinexin	SORBS3	75 kDa	5	3227107	3115682	2463648	2771669	2793747	3147874	0.989423	0.914969
1075	Q9Y4E8	Ubiquitin carboxyl-terminal hydrolase 15	USP15	112 kDa	24	8496932	9382203	10006190	11386450	10508970	9395408	1.12213	0.196811
1076	Q12849	G-rich sequence factor 1	GRSF1	53 kDa	7	22404030	21918140	24087230	19938130	21899780	22184970	0.935878	0.204546
1077	Q7KZ85	Transcription elongation factor SPT6	SUPT6H	199 kDa	31	42996670	43040590	33216120	55134760	49000960	58644090	1.36499	0.0291754
1078	P10768	S-formylglutathione hydrolase	ESD	31 kDa	7	13387370	15125590	21461750	14714700	21087570	17660700	1.0698	0.725351
1079	Q9UBC2	Epidermal growth factor receptor substrate 15-like 1	EPS15L1	94 kDa	22	7553182	7552386	8434257	6751311	7122822	7600835	0.912282	0.149062
1080	O00267	Transcription elongation factor SPT5	SUPT5H	121 kDa	26	1351673	1245058	993526	1751438	663843	1195950	1.00584	0.984766
1081	P13647	Keratin, type II cytoskeletal 5	KRT5	62 kDa	22	82472360	33456380	57717020	22025250	39663760	22488390	0.484765	0.158121
1082	O75688	Protein phosphatase 1B	PPM1B	53 kDa	13	4350525	4757504	4794551	4425800	4271646	6546836	1.09651	0.606714
1083	P06744	Glucose-6-phosphate isomerase	GPI	63 kDa	9	3705418	4184201	5707218	3852181	4083764	4564366	0.919354	0.615001
1084	Q9NR50	Translation initiation factor eIF-2B subunit gamma	EIF2B3	50 kDa	12	14133550	14898010	13444950	17371360	18792760	18042480	1.27615	0.00264436
1085	P42166	Lamina-associated polypeptide 2, isoform alpha	TMPO	75 kDa	16	43771460	49890850	54274850	46037900	45376330	55131740	0.990596	0.920781
1086	O75400	Pre-mRNA-processing factor 40 homolog A	PRPF40A	109 kDa	9	24612120	25193030	20981290	28046540	24130850	29846670	1.15875	0.159267
1087	Q08J23	RNA cytosine C(5)-methyltransferase NSUN2	NSUN2	86 kDa	19	27701720	31087730	38240150	34247500	36149130	34127080	1.07724	0.507894
1088	Q99584	Protein S100-A13	S100A13	11 kDa	3	107186900	137636600	155311700	147613600	162930600	116284600	1.06671	0.674109
1089	Q9UQ35	Serine/arginine repetitive matrix protein 2	SRRM2	300 kDa	24	37704700	38593100	34867500	36684180	35473760	38738930	0.997585	0.954557
1090	Q9Y5L0	Transportin-3	TNPO3	104 kDa	17	5642406	6220607	8944739	6379515	7070018	7304873	0.997436	0.987909
1091	Q9Y530	ADP-ribose glycohydrolase OARD1	OARD1	17 kDa	4	12031250	10993130	11094700	11470890	10694630	10744590	0.964566	0.390023
1092	Q6ZMK1	Cysteine and histidine-rich protein 1	CYHR1	41 kDa	4	1512094	1966038	2425692	4380521	3592770	3711085	1.97912	0.00597279
1093	Q53HC9	EARP and GARP complex-interacting protein 1	EIPR1	44 kDa	7	3144178	3154603	3853180	3131001	3832126	3509037	1.03154	0.748297
1094	Q8TCS8	Polyribonucleotide nucleotidyltransferase 1, mitochondrial	PNPT1	86 kDa	21	84527060	87984380	110988400	102288500	112189100	104609500	1.12553	0.287515
1095	Q9UKN8	General transcription factor 3C polypeptide 4	GTF3C4	92 kDa	13	10364140	11381760	12804520	15103720	13224710	13265980	1.20388	0.0681202
1096	Q9NY27	Serine/threonine-protein phosphatase 4 regulatory subunit 2	PPP4R2	47 kDa	7	5237728	5172685	8247661	5285086	5408711	4665812	0.823215	0.392359
1097	Q92466	DNA damage-binding protein 2	DDB2	48 kDa	11	33057310	36049050	43098520	35378930	42184010	36643650	1.01784	0.864329
1098	P08729	Keratin, type II cytoskeletal 7	KRT7	51 kDa	18	60564150	73042150	136841300	149684100	72862090	150874700	1.38075	0.382507
1099	P48556	26S proteasome non-ATPase regulatory subunit 8	PSMD8	40 kDa	6	28321520	29726880	27799410	28508240	32599200	29937820	1.06054	0.287117
1100	Q9ULF5	Zinc transporter ZIP10	SLC39A10	94 kDa	4	10634930	8145777	6195068	6879975	5081537	5907851	0.715468	0.198357
1101	Q8N5P1	Zinc finger CCCH domain-containing protein 8	ZC3H8	34 kDa	5	3032805	2932628	2836689	3522950	3783874	3711277	1.25176	0.00220946
1102	Q8TED0	U3 small nucleolar RNA-associated protein 15 homolog	UTP15	58 kDa	11	10065930	9941562	8671527	10890330	11767160	10292610	1.14893	0.0826833
1103	P50502	Hsc70-interacting protein	ST13	41 kDa	7	103796100	136366400	123430100	129070400	150638700	147484000	1.17492	0.149702
1104	Q92990	Glomulin	GLMN	68 kDa	12	5278486	5338138	8076314	6669860	7444013	5544260	1.05163	0.78278
1105	P30044	Peroxiredoxin-5, mitochondrial	PRDX5	22 kDa	6	79700340	111797800	108407200	98905880	103045700	98613970	1.0022	0.9848
1106	P35658	Nuclear pore complex protein Nup214	NUP214	214 kDa	21	19251260	23720140	25767390	24689940	25244560	25029640	1.09057	0.393568
1107	P21399	Cytoplasmic aconitate hydratase	ACO1	98 kDa	20	37927290	29255020	31867530	28798450	28730360	36101020	0.94528	0.637345
1108	P01031	Complement C5	C5	188 kDa	5	220102300	184043800	135517400	277103600	284977800	245306700	1.4961	0.0487473
1109	Q9NR28	Diablo homolog, mitochondrial	DIABLO	27 kDa	3	2928121	3726937	6083579	6756028	4788013	4707430	1.27576	0.375752
1110	Q9NP74	Palmdelphin	PALMD	63 kDa	3	2372507	2482972	2756801	2866882	2157281	2472618	0.984827	0.879831
1111	P05783	Keratin, type I cytoskeletal 18	KRT18	48 kDa	11	39926930	54192500	73552460	75379960	33911080	65512800	1.04254	0.888477
1112	Q8WXI9	Transcriptional repressor p66-beta	GATAD2B	65 kDa	4	1410407	1662668	2033525	1695252	2513666	2514464	1.31661	0.185856
1113	P80303	Nucleobindin-2	NUCB2	50 kDa	12	11799130	12389410	11951940	12913630	9826789	11482010	0.946928	0.550117
1114	P41227	N-alpha-acetyltransferase 10	NAA10	26 kDa	5	4562472	4812224	4799813	5151522	5587857	4795110	1.09595	0.17754
1115	Q14574	Desmocollin-3	DSC3	100 kDa	3	546918	433404	185935	377017	315942	293988	0.846252	0.634947
1116	Q9GZT9	Egl nine homolog 1	EGLN1	46 kDa	8	7097162	6677128	6200600	5675442	6047285	6199287	0.897227	0.10093
1117	Q86TH1	ADAMTS-like protein 2	ADAMTSL2	105 kDa	17	7705998	6923327	6170623	6963328	6280395	5804399	0.915777	0.357141
1118	O60437	Periplakin	PPL	205 kDa	16	4982287	5743596	6469059	5381066	5432642	5320204	0.938294	0.496807
1119	P21964	Catechol O-methyltransferase	COMT	30 kDa	4	4197628	3275171	3542728	5574456	4445305	4234759	1.29404	0.106691
1120	P31350	Ribonucleoside-diphosphate reductase subunit M2	RRM2	45 kDa	14	15754110	18383170	16529540	15173880	16409880	15351740	0.926356	0.250479
1121	P03973	Antileukoproteinase	SLPI	14 kDa	3	39597800	37663000	27841160	31671250	40467170	28934520	0.961666	0.802879
1122	Q9H0G5	Nuclear speckle splicing regulatory protein 1	NSRP1	66 kDa	6	10292760	12794960	11058520	12009370	9914496	11147250	0.968514	0.727961
1123	O95834	Echinoderm microtubule-associated protein-like 2	EML2	71 kDa	17	42408210	35744660	20216660	21058440	19733550	24385740	0.66258	0.231212
1124	Q9BRG1	Vacuolar protein-sorting-associated protein 25	VPS25	21 kDa	9	8575312	11155310	11364540	10413370	11372010	10032600	1.02325	0.82318
1125	Q9BTE6	Alanyl-tRNA editing protein Aarsd1	AARSD1	45 kDa	7	2607885	2048188	3148126	3405626	3786135	2495692	1.24131	0.277648
1126	P78362	SRSF protein kinase 2	SRPK2	78 kDa	14	23562040	28372310	24240680	26225260	29164740	22354810	1.02061	0.843864
1127	Q9BXR0	Queuine tRNA-ribosyltransferase catalytic subunit 1	QTRT1	44 kDa	3	2727117	3025660	3799869	3341658	4293930	3420323	1.15737	0.320331
1128	P02751	Fibronectin	FN1	272 kDa	38	5816775	3725873	5716411	7336767	5469282	7680286	1.34257	0.145983
1129	Q9H9Q4	Non-homologous end-joining factor 1	NHEJ1	33 kDa	4	1235294	1634739	1432589	1555820	1910152	1410246	1.13331	0.369847
1130	Q709C8	Vacuolar protein sorting-associated protein 13C	VPS13C	422 kDa	25	8210400	8900116	9330244	8191617	11231070	11423400	1.16661	0.293772
1131	Q9Y6D6	Brefeldin A-inhibited guanine nucleotide-exchange protein 1	ARFGEF1	209 kDa	17	6031265	5584883	4607097	4990850	4798380	4668333	0.891163	0.294889
1132	Q13620	Cullin-4B	CUL4B	104 kDa	24	21686850	26102190	31262810	34895620	38821540	31681890	1.33329	0.0687049
1133	Q9UBS4	DnaJ homolog subfamily B member 11	DNAJB11	41 kDa	8	13320610	15767990	19033040	18329580	16731340	19213380	1.12786	0.345769
1134	Q99460	26S proteasome non-ATPase regulatory subunit 1	PSMD1	106 kDa	26	14115470	12570940	19836290	20565600	19764420	18163920	1.25732	0.20606
1135	P35573	Glycogen debranching enzyme	AGL	175 kDa	27	7249629	8451917	11348700	11053220	11921300	12018460	1.29363	0.154788
1136	Q08378	Golgin subfamily A member 3	GOLGA3	167 kDa	34	17213430	19706440	22155910	18224150	20212620	20282600	0.993967	0.944964
1137	Q96EN8	Molybdenum cofactor sulfurase	MOCOS	98 kDa	8	13790430	9141192	10240450	10919270	11171610	9676977	0.957669	0.776537
1138	Q96JP5	E3 ubiquitin-protein ligase ZFP91	ZFP91	63 kDa	3	3890308	5280950	6274075	4812573	5172361	5404947	0.99641	0.981425
1139	Q14789	Golgin subfamily B member 1	GOLGB1	376 kDa	28	20268840	23108310	25450390	21929670	23871810	23956750	1.01352	0.862862
1140	P53992	Protein transport protein Sec24C	SEC24C	118 kDa	15	17947320	20199910	23818320	22699840	24326300	24332950	1.15159	0.201724
1141	Q9Y2B0	Protein canopy homolog 2	CNPY2	21 kDa	7	2937201	4033649	3950621	5272781	2974082	4297661	1.14861	0.524073
1142	P41091	Eukaryotic translation initiation factor 2 subunit 3	EIF2S3	51 kDa	13	71877530	72408870	89608400	53672820	71794550	75085490	0.857449	0.27842
1143	Q9BUQ8	Probable ATP-dependent RNA helicase DDX23	DDX23	96 kDa	19	62864800	67453760	73492150	76962740	79939150	72633490	1.12622	0.091855
1144	Q9NZB2	Constitutive coactivator of PPAR-gamma-like protein 1	FAM120A	122 kDa	15	10792710	12313030	14087830	15821580	15724590	13120300	1.20092	0.128166
1145	Q14694	Ubiquitin carboxyl-terminal hydrolase 10	USP10	87 kDa	18	8338029	9759768	11215990	8892097	12028290	10033730	1.05596	0.681523
1146	O60664	Perilipin-3	PLIN3	47 kDa	7	6281354	9122042	8056661	5427586	7123588	7143325	0.839491	0.28782
1147	Q8TD19	Serine/threonine-protein kinase Nek9	NEK9	107 kDa	15	7504625	10611700	11710700	11070510	10995690	10248540	1.0834	0.580617
1148	Q9BRJ6	Uncharacterized protein C7orf50	C7orf50	22 kDa	4	9972479	11907640	13835510	10553350	10846410	12251930	0.942212	0.617566
1149	Q9BT73	Proteasome assembly chaperone 3	PSMG3	13 kDa	2	8663847	7823664	10780810	10441020	10031670	10241910	1.12638	0.321067
1150	Q96GA3	Protein LTV1 homolog	LTV1	55 kDa	5	4907273	9868697	7528278	6452389	7575598	7532023	0.966632	0.880641
1151	P62318	Small nuclear ribonucleoprotein Sm D3	SNRPD3	14 kDa	3	375953600	439737200	511980400	566530700	535070100	530167300	1.22905	0.113594
1152	P46777	60S ribosomal protein L5	RPL5	34 kDa	10	35565130	41783840	53196440	26866380	41904540	33910080	0.786554	0.242622
1153	Q9H814	Phosphorylated adapter RNA export protein	PHAX	44 kDa	8	14605280	15362380	18870440	15775310	18320430	17812950	1.06287	0.547207
1154	P62841	40S ribosomal protein S15	RPS15	17 kDa	3	5803054	6273841	10247050	8120765	10485030	9926630	1.27811	0.282526
1155	P57772	Selenocysteine-specific elongation factor	EEFSEC	65 kDa	12	2215359	1243988	2730335	2066798	2252360	1823280	0.992367	0.975037
1156	P18206	Vinculin	VCL	124 kDa	35	2610239	2524215	3320850	2505634	2612177	2757539	0.931409	0.528832
1157	Q00653	Nuclear factor NF-kappa-B p100 subunit	NFKB2	97 kDa	8	3891457	4629174	4336109	5203873	4456256	4664265	1.11415	0.188901
1158	Q15758	Neutral amino acid transporter B(0)	SLC1A5	57 kDa	8	53176460	47976160	69085580	67783920	64255660	63828360	1.15055	0.30955
1159	P17480	Nucleolar transcription factor 1	UBTF	89 kDa	11	11555720	14037410	13246460	12545230	14414570	13352850	1.03793	0.620556
1160	Q9UDY4	DnaJ homolog subfamily B member 4	DNAJB4	38 kDa	9	6533444	8340117	8156016	7938489	7730769	7676729	1.01374	0.871808
1161	P50395	Rab GDP dissociation inhibitor beta	GDI2	51 kDa	27	134294300	142821200	186126300	187014100	171413500	177607100	1.15714	0.266453
1162	Q96EK6	Glucosamine 6-phosphate N-acetyltransferase	GNPNAT1	21 kDa	6	3271714	2014416	3342080	4343376	4417110	3160133	1.38159	0.138211
1163	Q9UIA9	Exportin-7	XPO7	124 kDa	22	54725190	54243690	61957210	66088020	69371910	65289910	1.17448	0.0389081
1164	Q9UPT5	Exocyst complex component 7	EXOC7	83 kDa	10	1397107	1698184	1845410	2522821	2175871	2261223	1.40869	0.0178331
1165	Q8IZ21	Phosphatase and actin regulator 4	PHACTR4	78 kDa	9	5954458	6345459	6218647	5568473	5877456	5200058	0.898881	0.0651337
1166	Q9Y625	Glypican-6	GPC6	63 kDa	6	15166600	12522690	10486320	11673580	9469934	11994270	0.868035	0.358212
1167	Q9Y2A7	Nck-associated protein 1	NCKAP1	129 kDa	17	11417850	11706530	15814400	16934190	15822980	15963740	1.25122	0.141712
1168	Q53H96	Pyrroline-5-carboxylate reductase 3	PYCR3	29 kDa	8	15200610	16613750	16887550	12989830	17265690	18318480	0.997374	0.982037
1169	P09603	Macrophage colony-stimulating factor 1	CSF1	60 kDa	4	7799298	6192212	5515686	10494770	14701860	10796080	1.8451	0.0372562
1170	Q9NRX4	14 kDa phosphohistidine phosphatase	PHPT1	14 kDa	2	1372091	1884001	2793219	1798761	1761875	1265077	0.797729	0.438854
1171	Q9UBR2	Cathepsin Z	CTSZ	34 kDa	6	6937930	5416656	6016251	5167497	2804192	4736073	0.691736	0.104929
1172	Q96KG9	N-terminal kinase-like protein	SCYL1	90 kDa	11	12195040	12296710	14112500	14986680	17118180	12356180	1.15171	0.293232
1173	Q14914	Prostaglandin reductase 1	PTGR1	36 kDa	12	17222280	20212490	27989970	24158400	26704810	23297590	1.13353	0.464925
1174	P08243	Asparagine synthetase [glutamine-hydrolyzing]	ASNS	64 kDa	16	20959920	19946760	23141490	22927050	19862600	23594190	1.03647	0.629037
1175	P26927	Hepatocyte growth factor-like protein	MST1	80 kDa	6	3993675	3675232	3177194	3461222	4086661	3714938	1.03842	0.668025
1176	P04264	Keratin, type II cytoskeletal 1	KRT1	66 kDa	22	2778470000	1580923000	2298419000	535982700	1268865000	596639500	0.360702	0.0339886
1177	Q96B45	BLOC-1-related complex subunit 7	BORCS7	12 kDa	6	6240781	6744473	6974353	6546721	6434963	6293787	0.965724	0.406667
1178	Q8IYD1	Eukaryotic peptide chain release factor GTP-binding subunit ERF3B	GSPT2	69 kDa	10	16714600	19167970	22475550	25004130	24587790	21191970	1.21292	0.121591
1179	P12273	Prolactin-inducible protein	PIP	17 kDa	5	26806250	8759814	7536085	2019321	3453929	2295728	0.180246	0.198695
1180	Q6P1N9	Putative deoxyribonuclease TATDN1	TATDN1	34 kDa	13	2766191	2801552	3033850	3884422	3583477	3389857	1.2623	0.0174286
1181	Q01085	Nucleolysin TIAR	TIAL1	42 kDa	10	18233160	19411930	20861500	18200690	19055580	18547740	0.953807	0.359064
1182	P22392	Nucleoside diphosphate kinase B	NME2	17 kDa	9	277798800	344210600	422918800	272428900	394699700	402916500	1.02404	0.894888
1183	Q14766	Latent-transforming growth factor beta-binding protein 1	LTBP1	187 kDa	14	629509	1085190	531448	574005	634462	827663	0.906499	0.734864
1184	Q69YQ0	Cytospin-A	SPECC1L	125 kDa	17	14467090	16446140	16040430	14981170	16180270	16669930	1.01869	0.72881
1185	O00622	CCN family member 1	CCN1	42 kDa	9	29029280	30475020	33048820	25452100	28629600	29538980	0.903489	0.156399
1186	Q12884	Prolyl endopeptidase FAP	FAP	88 kDa	10	21372010	20645980	17488880	21347320	20226340	20619210	1.04514	0.535469
1187	P10586	Receptor-type tyrosine-protein phosphatase F	PTPRF	213 kDa	34	55989300	36731140	31280180	48108980	43502630	45048750	1.10209	0.632194
1188	Q86X83	COMM domain-containing protein 2	COMMD2	23 kDa	2	1061299	1328029	1241826	1456870	1325922	1544658	1.19176	0.0861603
1189	Q8N9T8	Protein KRI1 homolog	KRI1	83 kDa	3	98084.9	190918	44527.3	115880	136739	216768	1.40733	0.442937
1190	P30101	Protein disulfide-isomerase A3	PDIA3	57 kDa	18	103794500	119840800	150458900	119968800	130765800	116718000	0.982246	0.88936
1191	P53621	Coatomer subunit alpha	COPA	138 kDa	34	35581110	38642200	45768760	49573440	50678530	46801310	1.22552	0.0814047
1192	P42566	Epidermal growth factor receptor substrate 15	EPS15	99 kDa	18	12150890	13818900	13296050	13750610	15400480	12516140	1.06116	0.465579
1193	P16885	1-phosphatidylinositol 4,5-bisphosphate phosphodiesterase gamma-2	PLCG2	148 kDa	16	820991	47590.2	372570	55034.6	230890	568176	0.688151	0.661134
1194	O00232	26S proteasome non-ATPase regulatory subunit 12	PSMD12	53 kDa	14	91250670	100409500	108281100	110253600	118899800	113848600	1.14356	0.0811998
1195	Q15018	BRISC complex subunit Abraxas 2	ABRAXAS2	47 kDa	10	27890970	29491900	31379460	28741410	27682170	28216140	0.953555	0.304549
1196	Q6DKI1	60S ribosomal protein L7-like 1	RPL7L1	30 kDa	4	1836058	2459081	4177040	2807085	3527219	2871056	1.08654	0.766641
1197	Q9HBD1	Roquin-2	RC3H2	132 kDa	6	1184462	1090585	1507669	1327274	1107659	733074	0.837495	0.398424
1198	Q14103	Heterogeneous nuclear ribonucleoprotein D0	HNRNPD	38 kDa	6	635479500	674660600	810634200	596589700	673887700	759866500	0.95736	0.693274
1199	P06737	Glycogen phosphorylase, liver form	PYGL	97 kDa	25	16236130	15819720	22698570	21525530	22774910	21156500	1.19546	0.247321
1200	P53602	Diphosphomevalonate decarboxylase	MVD	43 kDa	6	13634310	12158320	17291380	13145650	16497900	15338790	1.04406	0.747755
1201	P37802	Transgelin-2	TAGLN2	22 kDa	8	7556334	4262262	6397872	4371910	6806732	3172279	0.787799	0.421997
1202	Q9BV20	Methylthioribose-1-phosphate isomerase	MRI1	39 kDa	8	13431730	18127480	22639330	14187020	18345070	18201750	0.936074	0.724961
1203	O00233	26S proteasome non-ATPase regulatory subunit 9	PSMD9	25 kDa	5	10678570	15679100	14125160	11329610	11345810	13140110	0.884709	0.409974
1204	Q5VTR2	E3 ubiquitin-protein ligase BRE1A	RNF20	114 kDa	16	5294896	6470778	6887102	6237617	6654265	6933353	1.06286	0.510842
1205	P04920	Anion exchange protein 2	SLC4A2	137 kDa	8	3044579	3441683	4989233	4039184	3048321	5515826	1.09828	0.70755
1206	Q8IWS0	PHD finger protein 6	PHF6	41 kDa	7	11607720	17656610	12879600	13011190	14992700	15898390	1.04172	0.792611
1207	P29279	CCN family member 2	CCN2	38 kDa	11	82155310	82782810	80451960	61838280	89488840	67127940	0.890236	0.400445
1208	Q9H8H0	Nucleolar protein 11	NOL11	81 kDa	14	25223450	21164740	20210330	26276850	32034020	26935470	1.28	0.0610867
1209	P49753	Acyl-coenzyme A thioesterase 2, mitochondrial	ACOT2	53 kDa	10	5318861	7309333	10417080	8984533	10381100	6932569	1.14115	0.581613
1210	P05787	Keratin, type II cytoskeletal 8	KRT8	54 kDa	25	90278640	97918500	199100900	182979900	96916190	197423400	1.23243	0.558747
1211	O95218	Zinc finger Ran-binding domain-containing protein 2	ZRANB2	37 kDa	11	350698	914599	341256	326242	486817	1074131	1.17468	0.768249
1212	Q96ST3	Paired amphipathic helix protein Sin3a	SIN3A	145 kDa	12	8512807	9362610	8331971	9202863	10709590	9993030	1.14111	0.0902012
1213	O75695	Protein XRP2	RP2	40 kDa	2	4260708	5152200	4089202	4005910	4520060	4828462	0.989063	0.910212
1214	Q9BSE5	Agmatinase, mitochondrial	AGMAT	38 kDa	4	829174	751259	883267	797290	934190	1001793	1.10942	0.287374
1215	Q5VT52	Regulation of nuclear pre-mRNA domain-containing protein 2	RPRD2	156 kDa	12	11256520	11716110	13336500	12290060	12505390	13059990	1.04259	0.508027
1216	P20020	Plasma membrane calcium-transporting ATPase 1	ATP2B1	135 kDa	14	9288785	8115221	16028140	13532910	14411830	13517860	1.2402	0.391075
1217	O43747	AP-1 complex subunit gamma-1	AP1G1	91 kDa	13	39675740	39760080	45038900	49167810	52712180	55067790	1.26088	0.0118359
1218	Q13642	Four and a half LIM domains protein 1	FHL1	36 kDa	9	10238320	9217739	9830825	12566920	10511000	11551310	1.18241	0.0764314
1219	Q9Y4L1	Hypoxia up-regulated protein 1	HYOU1	111 kDa	23	18834740	18614170	26781560	23496810	21136390	25241730	1.08788	0.57117
1220	Q92925	SWI/SNF-related matrix-associated actin-dependent regulator of chromatin subfamily D member 2	SMARCD2	59 kDa	6	4354583	3794849	5271409	4933475	4731873	4550310	1.05922	0.605268
1221	Q9H307	Pinin	PNN	82 kDa	14	19357870	24321030	24764680	20997030	26508000	22721110	1.02604	0.815007
1222	O15446	DNA-directed RNA polymerase I subunit RPA34	CD3EAP	55 kDa	5	4926124	6619920	5249536	5773908	7203633	4739990	1.05489	0.746932
1223	Q05707	Collagen alpha-1(XIV) chain	COL14A1	194 kDa	14	11966570	10966800	9657945	12068690	10081950	8219736	0.931855	0.604885
1224	O75934	Pre-mRNA-splicing factor SPF27	BCAS2	26 kDa	10	34133340	42210830	45705540	45996970	46605330	41996200	1.10282	0.350992
1225	Q08752	Peptidyl-prolyl cis-trans isomerase D	PPID	41 kDa	14	38995320	43563230	39661240	38553210	44755750	44066130	1.04218	0.521217
1226	O43847	Nardilysin	NRDC	132 kDa	24	10625750	13360610	8373690	14645550	14055710	17274000	1.42074	0.0681736
1227	Q9BUP3	Oxidoreductase HTATIP2	HTATIP2	27 kDa	6	10362510	11337820	14436340	12533530	13733630	13229630	1.09298	0.461581
1228	Q8IZ07	Ankyrin repeat domain-containing protein 13A	ANKRD13A	68 kDa	8	927454	1241344	733351	799692	689004	1429544	1.00554	0.985474
1229	Q14696	LRP chaperone MESD	MESD	26 kDa	6	9564922	11112630	12992800	13108720	9979796	10430390	0.995502	0.972797
1230	Q9Y2L1	Exosome complex exonuclease RRP44	DIS3	109 kDa	12	11019150	11141230	13085460	12425450	14928200	11779860	1.1103	0.337123
1231	Q96DC8	Enoyl-CoA hydratase domain-containing protein 3, mitochondrial	ECHDC3	33 kDa	3	5739372	5689811	5973369	5253699	5710464	6737072	1.01716	0.843149
1232	Q9Y6M5	Zinc transporter 1	SLC30A1	55 kDa	8	18602890	20150420	27606170	24252180	24590730	23288870	1.08699	0.561429
1233	O15230	Laminin subunit alpha-5	LAMA5	400 kDa	47	43347910	30320420	27947470	30368860	28347960	30888790	0.881808	0.492116
1234	P63220	40S ribosomal protein S21	RPS21	9 kDa	3	138304600	278331200	215398400	151521200	215286800	190977800	0.882525	0.619718
1235	P23368	NAD-dependent malic enzyme, mitochondrial	ME2	65 kDa	10	6987637	6093667	7735116	6598586	8840696	9315483	1.18919	0.261665
1236	Q99547	M-phase phosphoprotein 6	MPHOSPH6	19 kDa	4	4415506	6212082	5467258	5865735	8780420	6022933	1.28421	0.249948
1237	P0DPB6	DNA-directed RNA polymerases I and III subunit RPAC2	POLR1D	15 kDa	4	8045753	10565380	9409892	10313690	9481306	10083550	1.06629	0.491375
1238	Q9Y4B5	Microtubule cross-linking factor 1	MTCL1	210 kDa	3	641193	527140	722919	463958	454671	548499	0.775744	0.113925
1239	Q8NEZ5	F-box only protein 22	FBXO22	45 kDa	9	31623260	30388980	34540270	33737350	41442770	38779570	1.18029	0.106802
1240	Q92564	DCN1-like protein 4	DCUN1D4	34 kDa	6	5916335	5987046	7107065	6435606	6193517	5951373	0.977383	0.753949
1241	P14618	Pyruvate kinase PKM	PKM	58 kDa	24	218520300	209814000	290956500	355009900	379622900	300585600	1.43922	0.039191
1242	Q9UJA5	tRNA (adenine(58)-N(1))-methyltransferase non-catalytic subunit TRM6	TRMT6	56 kDa	10	10230800	10867820	14214430	13462580	12002160	10183460	1.00949	0.946481
1243	Q8N1F7	Nuclear pore complex protein Nup93	NUP93	93 kDa	14	2915731	2529953	3786704	3727653	4130803	3842234	1.26735	0.147567
1244	P22681	E3 ubiquitin-protein ligase CBL	CBL	100 kDa	10	16378980	17378590	14245740	14477250	15352750	14968490	0.933238	0.367716
1245	Q6WCQ1	Myosin phosphatase Rho-interacting protein	MPRIP	117 kDa	7	1505040	1664029	1394620	1143726	1143098	1034590	0.727791	0.0197082
1246	P58107	Epiplakin	EPPK1	556 kDa	12	238668	361685	581328	453132	413055	466408	1.12771	0.667137
1247	Q9H0B8	Cysteine-rich secretory protein LCCL domain-containing 2	CRISPLD2	56 kDa	6	1920445	2269177	1393494	1194855	1967079	1503405	0.835616	0.419018
1248	Q9NWV4	CXXC motif containing zinc binding protein	CZIB	18 kDa	4	6784095	9120660	9414450	9668077	10798260	7110210	1.08916	0.614504
1249	Q9H853	Putative tubulin-like protein alpha-4B	TUBA4B	28 kDa	2	118964300	98757650	96101440	97119430	91477180	89862790	0.887312	0.239428
1250	P34896	Serine hydroxymethyltransferase, cytosolic	SHMT1	53 kDa	13	19308670	18649990	25362130	24533770	26302680	23122210	1.168	0.233875
1251	Q99614	Tetratricopeptide repeat protein 1	TTC1	34 kDa	7	18353730	24984400	23406870	23271690	24739620	22866770	1.06192	0.567323
1252	P30048	Thioredoxin-dependent peroxide reductase, mitochondrial	PRDX3	28 kDa	5	10282260	15691520	20631050	14832800	15903490	18470370	1.05583	0.805739
1253	P50552	Vasodilator-stimulated phosphoprotein	VASP	40 kDa	11	11488620	11392450	11943140	12637100	13391130	14353130	1.15958	0.0526373
1254	P62304	Small nuclear ribonucleoprotein E	SNRPE	11 kDa	4	382593000	510735100	556165400	473784600	466817900	480712800	0.98056	0.873424
1255	P40123	Adenylyl cyclase-associated protein 2	CAP2	53 kDa	10	23568250	28421170	34821820	27268800	32324760	21193230	0.930603	0.683686
1256	P05198	Eukaryotic translation initiation factor 2 subunit 1	EIF2S1	36 kDa	16	35135050	35300940	43728130	46196740	58104940	51168420	1.36181	0.0387666
1257	P55210	Caspase-7	CASP7	34 kDa	7	7343811	9939598	11004530	10295390	9203156	10619080	1.06468	0.642757
1258	Q8N806	Putative E3 ubiquitin-protein ligase UBR7	UBR7	48 kDa	8	17987210	22144110	18544850	17199320	18353080	17386780	0.902226	0.277146
1259	Q70E73	Ras-associated and pleckstrin homology domains-containing protein 1	RAPH1	135 kDa	6	2197392	1901787	2378451	2925290	2244233	2325478	1.15706	0.2664
1260	P49643	DNA primase large subunit	PRIM2	59 kDa	8	6906427	8492316	10698510	10315450	10999710	10726070	1.22776	0.210429
1261	Q13332	Receptor-type tyrosine-protein phosphatase S	PTPRS	217 kDa	23	3553200	3160115	3438363	3784530	3371106	3333373	1.03323	0.578963
1262	Q16718	NADH dehydrogenase [ubiquinone] 1 alpha subcomplex subunit 5	NDUFA5	13 kDa	3	3498270	4276348	3845179	4167604	3502993	4397285	1.03856	0.692211
1263	Q8TEX9	Importin-4	IPO4	119 kDa	12	912791	1244857	1504062	1178279	1755105	1636607	1.24805	0.284866
1264	Q99538	Legumain	LGMN	49 kDa	9	12331840	12959580	11098720	12933630	14446810	13489500	1.1231	0.103852
1265	Q96TA1	Protein Niban 2	NIBAN2	84 kDa	17	23546550	27064220	33221340	38930170	35647070	35701910	1.31548	0.0744633
1266	Q16698	2,4-dienoyl-CoA reductase, mitochondrial	DECR1	36 kDa	8	14518000	11563310	15062710	16136880	18374010	17809600	1.27164	0.0542875
1267	O75521	Enoyl-CoA delta isomerase 2, mitochondrial	ECI2	44 kDa	5	3926840	3389247	5679924	5086025	6302286	7686563	1.46775	0.118685
1268	Q9UHD9	Ubiquilin-2	UBQLN2	66 kDa	10	7632932	8394457	8811827	7443073	7024352	8262970	0.915101	0.233764
1269	P52788	Spermine synthase	SMS	41 kDa	7	138957300	166965100	194567000	188686800	189185500	192289900	1.13921	0.284628
1270	O60547	GDP-mannose 4,6 dehydratase	GMDS	42 kDa	11	2157136	745019	1788169	1720308	1727863	2419529	1.25102	0.47352
1271	Q6UVK1	Chondroitin sulfate proteoglycan 4	CSPG4	251 kDa	33	38579330	26515340	20099050	25785890	26422460	23136430	0.884394	0.608288
1272	Q9BW27	Nuclear pore complex protein Nup85	NUP85	75 kDa	8	3539148	3860459	6058177	4814127	5184751	6838757	1.25114	0.329076
1273	Q15554	Telomeric repeat-binding factor 2	TERF2	60 kDa	10	13139660	12803900	16861500	13428980	15593140	13173640	0.985766	0.900912
1274	P17858	ATP-dependent 6-phosphofructokinase, liver type	PFKL	85 kDa	16	8731592	8518725	11921820	13098480	15642470	11818500	1.39035	0.0733357
1275	O15145	Actin-related protein 2/3 complex subunit 3	ARPC3	21 kDa	4	63705340	63868950	74600820	72315910	74713120	69144240	1.06924	0.32884
1276	P50995	Annexin A11	ANXA11	54 kDa	11	30682980	9750310	10672210	21485200	8262172	9908816	0.775967	0.662986
1277	Q9NXG2	THUMP domain-containing protein 1	THUMPD1	39 kDa	6	11181820	8167647	15735350	18474000	15431660	9754047	1.2444	0.445308
1278	O94855	Protein transport protein Sec24D	SEC24D	113 kDa	10	5059491	4888140	5164933	6055816	5536060	5699565	1.14418	0.024361
1279	O95881	Thioredoxin domain-containing protein 12	TXNDC12	19 kDa	2	827661	1119543	1394263	1792464	1141123	1366366	1.28685	0.274269
1280	P17612	cAMP-dependent protein kinase catalytic subunit alpha	PRKACA	41 kDa	8	7859187	10833220	11100990	11379580	14266650	13932060	1.32842	0.0787789
1281	Q02218	2-oxoglutarate dehydrogenase, mitochondrial	OGDH	116 kDa	8	3588717	3774745	4348601	4582418	3249025	6956145	1.26259	0.445577
1282	Q96F86	Enhancer of mRNA-decapping protein 3	EDC3	56 kDa	8	6821464	8313841	7882953	8237236	7632823	7178297	1.00131	0.98615
1283	Q96EY8	Corrinoid adenosyltransferase	MMAB	27 kDa	4	7286825	7791766	8928382	7749729	7902720	7501767	0.964479	0.621271
1284	Q9H0E2	Toll-interacting protein	TOLLIP	30 kDa	3	1556765	1753368	2153743	2214165	2672558	2513628	1.35441	0.0469455
1285	Q9H9Y6	DNA-directed RNA polymerase I subunit RPA2	POLR1B	128 kDa	12	3172683	3263688	4697408	4350129	5956374	4509997	1.33077	0.159175
1286	Q13045	Protein flightless-1 homolog	FLII	145 kDa	25	10202280	12770980	16316950	15940340	14893380	13530940	1.12915	0.448862
1287	P07203	Glutathione peroxidase 1	GPX1	22 kDa	8	26649280	30344170	40121600	39447050	40705270	38304900	1.21976	0.216143
1288	Q93034	Cullin-5	CUL5	91 kDa	17	23870370	24135300	27894860	27438310	29085560	26411380	1.09268	0.211965
1289	Q96B97	SH3 domain-containing kinase-binding protein 1	SH3KBP1	73 kDa	7	3914400	4411948	5212090	3747231	4588711	3969313	0.908912	0.423621
1290	P24666	Low molecular weight phosphotyrosine protein phosphatase	ACP1	18 kDa	4	4315672	2701063	6464195	4519003	4793925	4433894	1.01972	0.942751
1291	P52306	Rap1 GTPase-GDP dissociation stimulator 1	RAP1GDS1	66 kDa	14	6177876	7507980	7339619	7307432	7119553	7125489	1.02506	0.716547
1292	Q9NQW6	Anillin	ANLN	124 kDa	12	7131649	7205286	6192327	7017907	6700460	4944184	0.909071	0.453298
1293	Q9Y3B9	RRP15-like protein	RRP15	31 kDa	5	12430320	15633800	14010480	18022100	15879560	10952680	1.06607	0.714902
1294	Q6P2E9	Enhancer of mRNA-decapping protein 4	EDC4	152 kDa	10	20565780	24667580	23861900	22006630	21949560	21677130	0.949896	0.454992
1295	P37235	Hippocalcin-like protein 1	HPCAL1	22 kDa	10	33309690	35210860	36685110	30224500	32793960	33616850	0.918537	0.113517
1296	P25705	ATP synthase subunit alpha, mitochondrial	ATP5F1A	60 kDa	11	22304920	18907940	51467220	55940510	35359080	62204160	1.65628	0.201526
1297	Q7Z2Z2	Elongation factor-like GTPase 1	EFL1	125 kDa	17	11981460	14215130	18955250	16888390	20372080	13824150	1.1314	0.518353
1298	Q9UHR5	SAP30-binding protein	SAP30BP	34 kDa	5	25895470	26753060	23599240	21803740	17314580	24855720	0.839028	0.19414
1299	Q96JB5	CDK5 regulatory subunit-associated protein 3	CDK5RAP3	57 kDa	15	19801630	22796900	21251530	24121790	24503860	21208690	1.09372	0.216719
1300	Q15181	Inorganic pyrophosphatase	PPA1	33 kDa	10	54492500	65631950	76499800	59128740	71792430	61154640	0.976867	0.850911
1301	Q9HA64	Ketosamine-3-kinase	FN3KRP	34 kDa	6	16020890	17317620	21184300	20417180	20165760	18464130	1.08298	0.441409
1302	Q9H4A4	Aminopeptidase B	RNPEP	73 kDa	17	21189860	33079970	36517330	33892210	40163650	32538520	1.17411	0.386743
1303	Q13895	Bystin	BYSL	50 kDa	10	8353442	8348802	10294530	10313900	10153640	9655793	1.11581	0.244514
1304	P25325	3-mercaptopyruvate sulfurtransferase	MPST	33 kDa	8	1607788	2321279	3695350	1829884	3972888	3198791	1.18062	0.628062
1305	P16152	Carbonyl reductase [NADPH] 1	CBR1	30 kDa	12	27507660	33583050	48379130	37587270	44865620	37231170	1.09331	0.649866
1306	Q8IZQ5	Selenoprotein H	SELENOH	13 kDa	4	19654970	26290760	28126780	16872870	23396280	23817880	0.865193	0.386065
1307	O43488	Aflatoxin B1 aldehyde reductase member 2	AKR7A2	40 kDa	8	17565340	20250290	28729830	25132250	27454340	27126300	1.19787	0.320961
1308	P50213	Isocitrate dehydrogenase [NAD] subunit alpha, mitochondrial	IDH3A	40 kDa	5	4448283	4333406	5347383	5357638	4414681	6285652	1.13652	0.375966
1309	Q92979	Ribosomal RNA small subunit methyltransferase NEP1	EMG1	27 kDa	8	82056780	93113720	114668800	100450300	106760100	102960700	1.07015	0.554557
1310	Q8NEB9	Phosphatidylinositol 3-kinase catalytic subunit type 3	PIK3C3	102 kDa	12	4629225	5851153	5453326	6445549	6389904	6212649	1.19546	0.0969959
1311	Q9H074	Polyadenylate-binding protein-interacting protein 1	PAIP1	54 kDa	5	34637380	42451630	44638810	40893950	41310440	44615380	1.04183	0.643422
1312	P03952	Plasma kallikrein	KLKB1	71 kDa	6	15400800	18499050	11047610	13133040	9837714	12509750	0.789377	0.282525
1313	Q6PD62	RNA polymerase-associated protein CTR9 homolog	CTR9	134 kDa	9	2204465	2747620	2760060	1796528	2739969	3188919	1.00172	0.992811
1314	Q96E11	Ribosome-recycling factor, mitochondrial	MRRF	29 kDa	3	16191110	21783230	17714490	14569190	18882800	16445200	0.896	0.41067
1315	P35659	Protein DEK	DEK	43 kDa	10	54364970	60154720	36180300	68694530	77130920	75927690	1.47149	0.067872
1316	Q9UFN0	Protein NipSnap homolog 3A	NIPSNAP3A	28 kDa	6	12930160	14014200	17882370	15318590	14026990	14178360	0.970937	0.803535
1317	P12081	Histidine--tRNA ligase, cytoplasmic	HARS1	57 kDa	13	22078930	26607580	30670080	24169060	33441360	35441560	1.17258	0.350852
1318	Q12788	Transducin beta-like protein 3	TBL3	89 kDa	11	5206456	6100683	7374070	7755330	7682791	6562359	1.17768	0.222194
1319	O43181	NADH dehydrogenase [ubiquinone] iron-sulfur protein 4, mitochondrial	NDUFS4	20 kDa	3	3563490	5249899	3969635	3698414	3606318	4519991	0.925033	0.621192
1320	Q14692	Ribosome biogenesis protein BMS1 homolog	BMS1	146 kDa	8	4079296	4749633	3711163	4796547	4638260	3843765	1.05889	0.592224
1321	Q9NTX5	Ethylmalonyl-CoA decarboxylase	ECHDC1	34 kDa	9	45351080	50757100	65282520	56269150	59028970	61482850	1.09536	0.482524
1322	Q9BSJ2	Gamma-tubulin complex component 2	TUBGCP2	103 kDa	17	5956342	5855974	8448493	7903883	8885402	8469493	1.24668	0.179928
1323	P00167	Cytochrome b5	CYB5A	15 kDa	5	2833729	8401225	4596774	5397273	4860786	4605524	0.938848	0.863138
1324	Q15050	Ribosome biogenesis regulatory protein homolog	RRS1	41 kDa	5	18044140	20817450	21648090	23154380	24949750	22316920	1.1638	0.0757188
1325	Q9UK45	U6 snRNA-associated Sm-like protein LSm7	LSM7	12 kDa	4	3112540	2735760	4866249	3747585	4795768	1753838	0.961048	0.906616
1326	P55196	Afadin	AFDN	207 kDa	22	3881169	5024394	4820818	3801547	3623946	4423138	0.863201	0.225614
1327	P35580	Myosin-10	MYH10	229 kDa	26	3572920	3784834	2988872	1365512	1549773	3181704	0.589273	0.119241
1328	O60306	RNA helicase aquarius	AQR	171 kDa	11	4003931	3860836	5179311	5463826	5247150	4536243	1.1689	0.227816
1329	Q06787	Synaptic functional regulator FMR1	FMR1	71 kDa	6	3196965	3923746	4076202	4323454	4111126	4463763	1.15196	0.161047
1330	Q9NQ48	Leucine zipper transcription factor-like protein 1	LZTFL1	35 kDa	7	2882113	3334178	3928367	3390162	3933270	3699856	1.08661	0.453884
1331	Q96FX7	tRNA (adenine(58)-N(1))-methyltransferase catalytic subunit TRMT61A	TRMT61A	31 kDa	4	2313491	2115085	2939017	1882316	2078452	2609523	0.891783	0.466364
1332	O76070	Gamma-synuclein	SNCG	13 kDa	3	5146479	6904319	4718814	4624028	5623160	5094811	0.914869	0.564497
1333	O43399	Tumor protein D54	TPD52L2	22 kDa	5	21097350	25580270	30208510	24102970	25677550	21798120	0.930969	0.584425
1334	Q9UNF1	Melanoma-associated antigen D2	MAGED2	65 kDa	4	70927.5	101388	17424.4	10925.4	62453	77994	0.797787	0.709057
1335	O00754	Lysosomal alpha-mannosidase	MAN2B1	114 kDa	14	5968852	4559788	4135709	5884390	4006385	5687457	1.06232	0.727217
1336	P49458	Signal recognition particle 9 kDa protein	SRP9	10 kDa	2	13789900	14823230	19126990	20307800	24614900	12603980	1.205	0.465079
1337	P61964	WD repeat-containing protein 5	WDR5	37 kDa	5	49741310	57304630	58924400	34062850	53808240	55220910	0.862154	0.386588
1338	O75175	CCR4-NOT transcription complex subunit 3	CNOT3	82 kDa	7	21110740	23872260	20101430	18338340	20351080	18375690	0.876786	0.126852
1339	P20849	Collagen alpha-1(IX) chain	COL9A1	92 kDa	3	54239350	42689640	37323260	44752510	43335680	42550560	0.973084	0.832483
1340	P30086	Phosphatidylethanolamine-binding protein 1	PEBP1	21 kDa	6	1124940	1985425	1845764	2247666	1046502	1390347	0.945196	0.849699
1341	P14550	Aldo-keto reductase family 1 member A1	AKR1A1	37 kDa	8	5268909	6631210	6771281	6730891	7437861	6176303	1.08964	0.41022
1342	Q14258	E3 ubiquitin/ISG15 ligase TRIM25	TRIM25	71 kDa	14	17826050	23173730	28088140	28079730	31962000	27535820	1.26762	0.161413
1343	Q9GZS3	WD repeat-containing protein 61	WDR61	34 kDa	6	716183	1193859	860375	1146190	1033962	1002023	1.14863	0.438077
1344	P30520	Adenylosuccinate synthetase isozyme 2	ADSS2	50 kDa	11	6928293	8123279	9763101	10351040	10481100	10268730	1.25333	0.124678
1345	Q9UHB9	Signal recognition particle subunit SRP68	SRP68	71 kDa	16	15764860	17583000	20973600	22019300	25254900	21646100	1.26875	0.0680993
1346	P20042	Eukaryotic translation initiation factor 2 subunit 2	EIF2S2	38 kDa	18	115315800	123293300	128667400	131569400	151928000	152069500	1.18594	0.0581501
1347	O15027	Protein transport protein Sec16A	SEC16A	252 kDa	19	23072080	27420870	26535760	22819540	24494390	23611660	0.920768	0.261442
1348	Q9UNN5	FAS-associated factor 1	FAF1	74 kDa	12	45906060	51377280	54799870	47080140	46199020	48517860	0.932365	0.315403
1349	Q9BTT0	Acidic leucine-rich nuclear phosphoprotein 32 family member E	ANP32E	31 kDa	5	32613660	49999430	15045090	44890940	49466440	41804490	1.39427	0.3305
1350	Q9HBI1	Beta-parvin	PARVB	42 kDa	8	8190817	10914960	8423365	10516720	7183240	9148753	0.975283	0.870289
1351	Q9NWS0	PIH1 domain-containing protein 1	PIH1D1	32 kDa	6	12972840	13275610	14617790	17026980	13765620	14631840	1.11154	0.260538
1352	P04350	Tubulin beta-4A chain	TUBB4A	50 kDa	19	17964830	13922900	11980990	12426610	10469770	12028270	0.796117	0.227092
1353	Q9NZL9	Methionine adenosyltransferase 2 subunit beta	MAT2B	38 kDa	10	37472060	47943410	51829640	48384970	55464510	49276280	1.11571	0.35315
1354	Q06481	Amyloid-like protein 2	APLP2	87 kDa	13	39534200	26568490	28335730	28115730	22160070	26277460	0.810616	0.278896
1355	P13797	Plastin-3	PLS3	71 kDa	26	23963830	23416710	31880330	25961030	37603290	32003780	1.20574	0.280617
1356	Q9Y608	Leucine-rich repeat flightless-interacting protein 2	LRRFIP2	82 kDa	10	13958690	17122070	15951870	14142370	17815290	15769740	1.01477	0.877456
1357	P04843	Dolichyl-diphosphooligosaccharide--protein glycosyltransferase subunit 1	RPN1	69 kDa	12	4813942	3325013	12417960	12429740	5077677	17840960	1.71954	0.352551
1358	P04062	Lysosomal acid glucosylceramidase	GBA	60 kDa	6	28539710	21459600	23538300	23824420	25913780	19449630	0.94085	0.63632
1359	P51654	Glypican-3	GPC3	66 kDa	8	51664980	44266170	43029110	46462020	43805020	48320630	0.997319	0.969644
1360	Q9UJX5	Anaphase-promoting complex subunit 4	ANAPC4	92 kDa	15	9487554	11447760	13948940	13995920	15164400	15040930	1.26708	0.128967
1361	Q02809	Procollagen-lysine,2-oxoglutarate 5-dioxygenase 1	PLOD1	84 kDa	19	20407740	14221880	15267030	16607690	12632870	18813940	0.963081	0.826988
1362	Q8IYL3	UPF0688 protein C1orf174	C1orf174	26 kDa	1	1724694	1653725	1300757	1144409	1203059	1348603	0.789898	0.113728
1363	Q16543	Hsp90 co-chaperone Cdc37	CDC37	44 kDa	8	5120917	5848828	5723609	5566028	5949590	5764033	1.03512	0.493658
1364	Q8IY81	pre-rRNA 2'-O-ribose RNA methyltransferase FTSJ3	FTSJ3	97 kDa	6	7225345	7218296	7567834	7324807	8760448	8553271	1.11935	0.183874
1365	Q9BXK5	Bcl-2-like protein 13	BCL2L13	53 kDa	9	8020272	10085860	10346270	8614872	8862573	9260751	0.939752	0.522335
1366	P07741	Adenine phosphoribosyltransferase	APRT	20 kDa	5	26064790	26924770	32920000	26122290	34181610	30069820	1.05196	0.663553
1367	P21810	Biglycan	BGN	42 kDa	8	127075300	114257600	87632670	79895550	83850060	82158020	0.747506	0.13868
1368	Q92917	G-patch domain and KOW motifs-containing protein	GPKOW	52 kDa	6	7958194	9693598	8186897	6483593	7313580	7176169	0.811703	0.0784183
1369	Q5F1R6	DnaJ homolog subfamily C member 21	DNAJC21	62 kDa	7	8827059	12337790	8342828	15036640	15009390	11644430	1.41287	0.0747967
1370	O95926	Pre-mRNA-splicing factor SYF2	SYF2	29 kDa	3	4926254	6541038	6116888	6222465	6394164	5582185	1.03495	0.731141
1371	Q7KZF4	Staphylococcal nuclease domain-containing protein 1	SND1	102 kDa	29	6850834	15743550	10828020	10393310	14689160	13709260	1.16065	0.579093
1372	O15305	Phosphomannomutase 2	PMM2	28 kDa	9	6014342	9004145	11259150	8579758	9016106	8217913	0.982348	0.928658
1373	Q5QJ74	Tubulin-specific chaperone cofactor E-like protein	TBCEL	48 kDa	8	12691610	14222960	10802650	11513660	9810273	10113330	0.833499	0.157026
1374	Q96EK5	KIF-binding protein	KIFBP	72 kDa	15	2286428	2383462	2877665	1920159	2418493	2551965	0.91296	0.455898
1375	P30154	Serine/threonine-protein phosphatase 2A 65 kDa regulatory subunit A beta isoform	PPP2R1B	66 kDa	8	979940	1253173	1397830	1102721	1312517	1982112	1.21108	0.449969
1376	P49419	Alpha-aminoadipic semialdehyde dehydrogenase	ALDH7A1	58 kDa	13	29392460	35868820	45517790	36185580	41133470	37080180	1.03268	0.825749
1377	Q969G3	SWI/SNF-related matrix-associated actin-dependent regulator of chromatin subfamily E member 1	SMARCE1	47 kDa	9	25817620	28932640	28536580	30165120	28328080	26342860	1.0186	0.744208
1378	Q8IX12	Cell division cycle and apoptosis regulator protein 1	CCAR1	133 kDa	9	5478152	5657114	4695207	6262809	6114302	6226039	1.17515	0.0855677
1379	Q9UNQ0	Broad substrate specificity ATP-binding cassette transporter ABCG2	ABCG2	72 kDa	7	3674332	3570383	6886702	7329795	5424143	5259060	1.27468	0.378663
1380	Q9NZ32	Actin-related protein 10	ACTR10	46 kDa	7	3562728	3795220	5525839	4961276	5281460	4186044	1.11992	0.514503
1381	Q9UK59	Lariat debranching enzyme	DBR1	62 kDa	7	16575190	17005140	18037880	18650950	18998880	18818510	1.09396	0.0585113
1382	P63010	AP-2 complex subunit beta	AP2B1	105 kDa	22	28819080	33110020	37105310	41768070	37810620	40225260	1.20972	0.0833066
1383	Q9Y6Y8	SEC23-interacting protein	SEC23IP	111 kDa	19	14584440	16702180	19214980	17408820	20250070	18292190	1.10791	0.325383
1384	Q9BZH6	WD repeat-containing protein 11	WDR11	137 kDa	12	6580708	5893417	8721982	7354858	9376065	8804854	1.20474	0.2451
1385	O00469	Procollagen-lysine,2-oxoglutarate 5-dioxygenase 2	PLOD2	85 kDa	13	2211716	1852008	2244285	2158645	2359930	2222012	1.06858	0.379473
1386	O00625	Pirin	PIR	32 kDa	6	4427020	5622654	5756165	6873814	5605936	4883666	1.09854	0.513724
1387	Q5SWX8	Protein odr-4 homolog	ODR4	51 kDa	4	1524580	1474646	1743355	1527722	1947181	1912426	1.13595	0.25805
1388	Q9NW13	RNA-binding protein 28	RBM28	86 kDa	11	12470160	12975550	10204960	13395380	12766830	12595780	1.08716	0.348234
1389	Q14691	DNA replication complex GINS protein PSF1	GINS1	23 kDa	4	9204854	8897800	10455020	10453560	11569880	10026580	1.12229	0.153653
1390	Q13363	C-terminal-binding protein 1	CTBP1	48 kDa	6	10185050	10140220	9862956	9161146	8148049	9562990	0.890154	0.112519
1391	P33240	Cleavage stimulation factor subunit 2	CSTF2	61 kDa	7	9327079	11131820	10528700	8632825	9585601	10027110	0.911511	0.249072
1392	Q5JTV8	Torsin-1A-interacting protein 1	TOR1AIP1	66 kDa	8	2553288	2739463	3663536	4814613	2827752	4510438	1.3569	0.225194
1393	P19338	Nucleolin	NCL	77 kDa	9	1314634000	1445871000	539323900	1405078000	1270527000	1448000000	1.24964	0.435006
1394	Q8TAD8	Smad nuclear-interacting protein 1	SNIP1	46 kDa	3	1277695	1508312	1879815	2129741	1871896	1045742	1.08178	0.75393
1395	Q9UKK9	ADP-sugar pyrophosphatase	NUDT5	24 kDa	7	31253200	43578680	36304450	34436140	43435430	36125480	1.02574	0.843825
1396	O95425	Supervillin	SVIL	248 kDa	12	603752	773787	680254	636916	741925	613838	0.968358	0.748648
1397	Q9UQP3	Tenascin-N	TNN	144 kDa	8	12628900	9889675	8642812	9161629	8701465	9719506	0.885153	0.419237
1398	Q00341	Vigilin	HDLBP	141 kDa	21	9030967	10732190	9346033	10111310	9701818	11359020	1.07087	0.394984
1399	Q5T280	Putative methyltransferase C9orf114	SPOUT1	42 kDa	3	1874711	2201277	2596690	2542701	2970368	2464073	1.19549	0.176911
1400	Q13330	Metastasis-associated protein MTA1	MTA1	81 kDa	8	6790892	7296648	9992405	8626202	10880940	10526340	1.24724	0.185865
1401	Q96A49	Synapse-associated protein 1	SYAP1	40 kDa	6	10676530	17463790	19535710	15386880	18295660	14063520	1.00147	0.994216
1402	Q92620	Pre-mRNA-splicing factor ATP-dependent RNA helicase PRP16	DHX38	141 kDa	11	4184174	4999444	4689514	4933681	5001080	4892677	1.06879	0.311857
1403	Q9BW85	Splicing factor YJU2	YJU2	37 kDa	6	7189844	7730132	7185662	8057051	6576258	6747539	0.967212	0.667719
1404	P55084	Trifunctional enzyme subunit beta, mitochondrial	HADHB	51 kDa	9	11589350	10006800	19579600	15774340	13647700	17026050	1.12804	0.62106
1405	Q9H2U1	ATP-dependent DNA/RNA helicase DHX36	DHX36	115 kDa	12	9404387	9618737	10038350	8425650	9030303	5490816	0.789594	0.20044
1406	Q04760	Lactoylglutathione lyase	GLO1	21 kDa	4	9473449	9775833	12550650	9630752	10992290	11875230	1.02196	0.854198
1407	Q9UBT7	Alpha-catulin	CTNNAL1	82 kDa	1	30495.9	61372.3	6345.24	100969	138214	110160	3.55697	0.0159537
1408	Q5T5C0	Syntaxin-binding protein 5	STXBP5	128 kDa	5	2407414	2629293	2331161	2279903	2641698	2195887	0.966017	0.640478
1409	Q16831	Uridine phosphorylase 1	UPP1	34 kDa	9	11761800	12456320	15866070	12019090	12582910	11815420	0.908523	0.437748
1410	O00533	Neural cell adhesion molecule L1-like protein	CHL1	135 kDa	6	4276775	5181632	4151081	5210625	4379477	4808469	1.05798	0.553076
1411	P49354	Protein farnesyltransferase/geranylgeranyltransferase type-1 subunit alpha	FNTA	44 kDa	9	6447502	7279140	6931275	6308482	6381588	7208657	0.963249	0.539023
1412	O14828	Secretory carrier-associated membrane protein 3	SCAMP3	38 kDa	3	2655493	2509505	8340392	1864763	2576795	4182277	0.638548	0.493482
1413	Q13126	S-methyl-5'-thioadenosine phosphorylase	MTAP	31 kDa	12	13178010	16717790	19786920	17595860	19581990	16490110	1.08021	0.57622
1414	P19784	Casein kinase II subunit alpha'	CSNK2A2	41 kDa	13	40961310	53694160	51253210	47364890	45359940	45258600	0.945683	0.569983
1415	Q3LXA3	Triokinase/FMN cyclase	TKFC	59 kDa	11	4472063	4146822	5193548	4742374	5210751	4490692	1.04571	0.607781
1416	P51151	Ras-related protein Rab-9A	RAB9A	23 kDa	5	13637000	13539370	16823110	17108310	16054720	14040940	1.07283	0.490638
1417	P18124	60S ribosomal protein L7	RPL7	29 kDa	10	39185370	52053700	50953200	50802260	59826770	43775830	1.08589	0.548281
1418	P40763	Signal transducer and activator of transcription 3	STAT3	88 kDa	14	25025600	23153590	23796500	25413670	24839540	22567760	1.01174	0.799922
1419	Q8WVV9	Heterogeneous nuclear ribonucleoprotein L-like	HNRNPLL	60 kDa	11	6335685	6067550	6323787	7305972	7473174	7160530	1.17155	0.00104726
1420	Q9UHN6	Cell surface hyaluronidase	CEMIP2	154 kDa	20	24469020	23061190	30234620	26172100	23019600	24377820	0.946051	0.602272
1421	Q92922	SWI/SNF complex subunit SMARCC1	SMARCC1	123 kDa	19	10718380	9553282	9508766	8285173	10657140	8876353	0.934126	0.479066
1422	Q71RC2	La-related protein 4	LARP4	81 kDa	6	6314587	7475472	7087342	6997233	6858134	6761096	0.987501	0.824412
1423	Q15599	Na(+)/H(+) exchange regulatory cofactor NHE-RF2	SLC9A3R2	37 kDa	7	11658260	14156040	12552590	9096588	13283400	12525800	0.909789	0.49
1424	Q5T0F9	Coiled-coil and C2 domain-containing protein 1B	CC2D1B	94 kDa	15	14773150	15508760	15773700	15129140	16484770	15262450	1.01782	0.633001
1425	Q9H2P9	Diphthine methyl ester synthase	DPH5	32 kDa	4	6859542	8103227	8315302	8211735	8639093	10179060	1.16117	0.17601
1426	P11279	Lysosome-associated membrane glycoprotein 1	LAMP1	45 kDa	3	12731940	19293150	19772910	16096920	14736260	20585390	0.992675	0.967171
1427	Q92882	Osteoclast-stimulating factor 1	OSTF1	24 kDa	3	3211808	7395589	5497102	4311774	6624043	5188053	1.0012	0.99656
1428	Q969G6	Riboflavin kinase	RFK	18 kDa	3	2882379	3043025	3206932	4234154	4257888	2827392	1.23949	0.260863
1429	Q8TCD5	5'(3')-deoxyribonucleotidase, cytosolic type	NT5C	23 kDa	5	2454681	3213466	4314459	3046722	4403180	2959840	1.04279	0.851868
1430	Q5VIR6	Vacuolar protein sorting-associated protein 53 homolog	VPS53	80 kDa	4	396916	256959	456146	572253	653283	775239	1.80246	0.0236469
1431	Q13426	DNA repair protein XRCC4	XRCC4	38 kDa	3	5028908	5419708	4880761	5906768	4355974	5495014	1.02794	0.79376
1432	Q8NBF6	Late secretory pathway protein AVL9 homolog	AVL9	72 kDa	7	6090022	6345543	7112123	6324273	7608625	6115847	1.02563	0.782075
1433	Q15435	Protein phosphatase 1 regulatory subunit 7	PPP1R7	42 kDa	10	22122360	21600960	25288500	25135970	22649900	20741980	0.992987	0.929675
1434	Q10567	AP-1 complex subunit beta-1	AP1B1	105 kDa	23	7348820	7344198	9541814	9186448	9674799	10191150	1.19879	0.147417
1435	P13693	Translationally-controlled tumor protein	TPT1	20 kDa	5	15722330	18837070	20529770	21718850	23027510	21436900	1.20138	0.107062
1436	Q58FF8	Putative heat shock protein HSP 90-beta 2	HSP90AB2P	44 kDa	10	290567700	307957700	381800700	418724300	406907000	371135400	1.22078	0.105911
1437	P10619	Lysosomal protective protein	CTSA	54 kDa	4	1491136	1917108	1428647	2979831	1431703	2009620	1.32754	0.36483
1438	Q00059	Transcription factor A, mitochondrial	TFAM	29 kDa	4	9036313	13193530	12352460	13386100	10735550	12031970	1.04544	0.745232
1439	P53634	Dipeptidyl peptidase 1	CTSC	52 kDa	6	5060069	6210753	5327558	5595747	4398440	4978541	0.90206	0.331052
1440	Q9GZR2	RNA exonuclease 4	REXO4	47 kDa	4	9765084	9492138	9975852	10625770	10711600	11775950	1.13273	0.0585379
1441	Q9H9T3	Elongator complex protein 3	ELP3	62 kDa	11	5306710	5860733	6849352	5171964	6579328	6322593	1.00317	0.977176
1442	P37108	Signal recognition particle 14 kDa protein	SRP14	15 kDa	5	41512770	57073740	59298420	48691830	54470360	56154420	1.00907	0.942574
1443	O15160	DNA-directed RNA polymerases I and III subunit RPAC1	POLR1C	39 kDa	7	8409365	11275210	10838080	9869543	9684300	9720477	0.959101	0.686799
1444	Q6DD87	Zinc finger protein 787	ZNF787	40 kDa	4	920520	1402909	1433984	966967	1244457	1488694	0.984752	0.936294
1445	O15381	Nuclear valosin-containing protein-like	NVL	95 kDa	10	15785920	17836570	15786370	18462000	18740490	15317630	1.06297	0.475505
1446	Q96EU6	Ribosomal RNA processing protein 36 homolog	RRP36	30 kDa	3	453840	343799	570249	580096	616969	528312	1.26134	0.202092
1447	O95163	Elongator complex protein 1	ELP1	150 kDa	14	14168280	16090910	22390770	15636380	17476350	17937320	0.969612	0.853046
1448	O00746	Nucleoside diphosphate kinase, mitochondrial	NME4	21 kDa	6	9445449	9212286	11420630	9764259	12283260	7624656	0.986496	0.934518
1449	Q6E0U4	Dermokine	DMKN	47 kDa	1	17042530	13555610	11102390	12682680	12040650	14706980	0.945559	0.718753
1450	Q08830	Fibrinogen-like protein 1	FGL1	36 kDa	2	76726750	75107250	73161740	69737710	82829900	66438980	0.973381	0.731109
1451	P52732	Kinesin-like protein KIF11	KIF11	119 kDa	15	12913600	12104110	14522730	10331640	15170210	12243950	0.954613	0.729915
1452	Q92542	Nicastrin	NCSTN	78 kDa	4	4594953	3931452	8201319	6822235	6775468	7479848	1.26004	0.38867
1453	P08758	Annexin A5	ANXA5	36 kDa	11	48593620	54289570	119543000	67436580	78747870	71477420	0.97858	0.951005
1454	Q9NQC3	Reticulon-4	RTN4	130 kDa	5	23866750	32455560	34002160	34115660	32950270	33794820	1.11665	0.38115
1455	P22033	Methylmalonyl-CoA mutase, mitochondrial	MMUT	83 kDa	11	11869500	12502060	14613830	14479510	14472580	13553800	1.0903	0.291432
1456	P24539	ATP synthase F(0) complex subunit B1, mitochondrial	ATP5PB	29 kDa	6	908196	717148	6918008	8728860	2182348	8619792	2.28611	0.285436
1457	Q08AD1	Calmodulin-regulated spectrin-associated protein 2	CAMSAP2	168 kDa	4	1481514	1646307	2058690	1740328	2288008	2417968	1.2429	0.19654
1458	Q9UKD2	mRNA turnover protein 4 homolog	MRTO4	28 kDa	10	153212500	166028800	151303100	173764700	180529800	183255800	1.1424	0.0213598
1459	Q6YHK3	CD109 antigen	CD109	162 kDa	15	14495400	15396270	17836330	12322590	13035750	14225720	0.829368	0.0942835
1460	P13804	Electron transfer flavoprotein subunit alpha, mitochondrial	ETFA	35 kDa	12	35201780	37593880	50042870	45358990	50822290	38396320	1.09557	0.541471
1461	Q96N67	Dedicator of cytokinesis protein 7	DOCK7	243 kDa	4	223630	426158	485900	313786	409189	106525	0.730393	0.441809
1462	P52815	39S ribosomal protein L12, mitochondrial	MRPL12	21 kDa	2	11037760	16158330	11788930	12592440	13112540	12037960	0.96814	0.821343
1463	Q6PJG2	Mitotic deacetylase-associated SANT domain protein	MIDEAS	115 kDa	3	1935949	2423611	2655021	2373577	1572850	2410927	0.906306	0.562891
1464	P48200	Iron-responsive element-binding protein 2	IREB2	105 kDa	5	5705607	5548602	5437786	5080109	5660214	5597099	0.978758	0.599592
1465	O00764	Pyridoxal kinase	PDXK	35 kDa	8	18618070	20240840	21508120	21270910	26368240	21492970	1.1452	0.216088
1466	Q14764	Major vault protein	MVP	99 kDa	19	27479920	30065690	34713450	28127150	34721380	26101020	0.964128	0.759386
1467	O60330	Protocadherin gamma-A12	PCDHGA12	101 kDa	6	6937823	7283473	10536400	8519483	5491304	7917172	0.885703	0.558299
1468	Q99543	DnaJ homolog subfamily C member 2	DNAJC2	72 kDa	9	22724430	23448130	25016130	21506210	25391360	23705200	0.991769	0.890394
1469	Q8N5M1	ATP synthase mitochondrial F1 complex assembly factor 2	ATPAF2	33 kDa	7	8231703	11872670	12108650	11803630	12136490	12589360	1.134	0.370165
1470	O15347	High mobility group protein B3	HMGB3	23 kDa	4	97117080	137174000	58950930	96248540	113327300	134470400	1.17325	0.550287
1471	P40306	Proteasome subunit beta type-10	PSMB10	29 kDa	2	10014320	10103520	9807462	9985693	10409030	11950640	1.08087	0.308417
1472	Q14517	Protocadherin Fat 1	FAT1	506 kDa	39	37578520	32455450	31389350	30095980	31470750	30703700	0.909756	0.248604
1473	O43264	Centromere/kinetochore protein zw10 homolog	ZW10	89 kDa	6	1432548	1863020	2483447	1931933	2658317	2751161	1.27036	0.264672
1474	Q9UPN3	Microtubule-actin cross-linking factor 1, isoforms 1/2/3/5	MACF1	838 kDa	46	3704100	5003403	4647574	4799002	5148711	5299071	1.14165	0.240444
1475	Q96GG9	DCN1-like protein 1	DCUN1D1	30 kDa	8	62146000	69298220	65180100	74044130	68574560	64412470	1.05293	0.37896
1476	Q13188	Serine/threonine-protein kinase 3	STK3	56 kDa	7	1787115	2389163	2828354	1727925	2523605	2449222	0.956617	0.810286
1477	Q13228	Methanethiol oxidase	SELENBP1	52 kDa	13	17326580	13435950	21690280	9819972	12480900	9217951	0.600899	0.0833239
1478	P15586	N-acetylglucosamine-6-sulfatase	GNS	62 kDa	7	3302343	3442393	2795342	3465663	3408181	3208259	1.05682	0.463975
1479	P13861	cAMP-dependent protein kinase type II-alpha regulatory subunit	PRKAR2A	46 kDa	14	20295080	22915450	25374500	28057380	28689610	25200170	1.19483	0.0761779
1480	Q96BP3	Peptidylprolyl isomerase domain and WD repeat-containing protein 1	PPWD1	74 kDa	15	20051480	20445010	24558840	23888540	25736000	24650740	1.14172	0.155789
1481	P48163	NADP-dependent malic enzyme	ME1	64 kDa	13	10844310	12972970	14885690	14316680	14783990	13581760	1.10282	0.375014
1482	Q9HCC0	Methylcrotonoyl-CoA carboxylase beta chain, mitochondrial	MCCC2	61 kDa	11	13910890	15677570	19431910	18565100	18266540	16139990	1.0806	0.519624
1483	Q9UBK9	Protein UXT	UXT	18 kDa	2	9933565	10447560	11387540	8688662	10461770	8794980	0.879653	0.155173
1484	P09382	Galectin-1	LGALS1	15 kDa	4	22086780	31787260	25811590	19552340	14679740	28290030	0.78461	0.31279
1485	Q7Z3B4	Nucleoporin p54	NUP54	55 kDa	11	9938659	14450010	14561080	11624350	13383160	13061380	0.977385	0.869524
1486	P06681	Complement C2	C2	83 kDa	12	18612180	16001610	14380960	14680370	15923040	13902920	0.90839	0.356726
1487	O75390	Citrate synthase, mitochondrial	CS	52 kDa	9	95665600	84920270	124696400	116563000	112265000	113863400	1.12254	0.404095
1488	Q9HB40	Retinoid-inducible serine carboxypeptidase	SCPEP1	51 kDa	6	16836770	13488170	12900220	14108410	15883230	12765700	0.989177	0.923763
1489	Q13042	Cell division cycle protein 16 homolog	CDC16	72 kDa	12	8904143	10202820	11867820	12407820	13879320	12992930	1.26813	0.0647275
1490	P08779	Keratin, type I cytoskeletal 16	KRT16	51 kDa	19	11897130	1952985	10350990	833092	28035730	1370270	1.24949	0.84841
1491	Q9C0C2	182 kDa tankyrase-1-binding protein	TNKS1BP1	182 kDa	18	23251000	30722110	33785870	31095240	30704270	30628150	1.0532	0.668329
1492	Q8NCN5	Pyruvate dehydrogenase phosphatase regulatory subunit, mitochondrial	PDPR	99 kDa	11	11590110	12001980	16116280	14516070	15425000	18822730	1.22805	0.197364
1493	Q99590	Protein SCAF11	SCAF11	165 kDa	13	14397910	17548920	17702090	14488350	14094320	13166440	0.840887	0.121818
1494	P04080	Cystatin-B	CSTB	11 kDa	2	9886983	11740190	13665190	10445720	12642050	11102610	0.968776	0.789841
1495	P27105	Erythrocyte band 7 integral membrane protein	STOM	32 kDa	6	20330580	17733060	22089810	20744260	19797520	20838990	1.0204	0.7809
1496	Q9Y3D6	Mitochondrial fission 1 protein	FIS1	17 kDa	3	2367305	3112878	2510415	2814405	2724008	2483517	1.00392	0.969411
1497	Q9Y3B8	Oligoribonuclease, mitochondrial	REXO2	27 kDa	4	3137374	4416718	4932711	4706737	4864860	4949333	1.1629	0.331224
1498	Q15654	Thyroid receptor-interacting protein 6	TRIP6	50 kDa	6	6457101	9564113	8673755	6420644	6550877	7041788	0.81042	0.230108
1499	Q8NBM8	Prenylcysteine oxidase-like	PCYOX1L	55 kDa	6	2120077	3988110	2358262	2181607	1190286	1131518	0.531913	0.140764
1500	Q96FH0	BLOC-1-related complex subunit 8	BORCS8	13 kDa	2	5033272	5350560	4711960	5053711	5406692	5397350	1.05048	0.319523
1501	P36873	Serine/threonine-protein phosphatase PP1-gamma catalytic subunit	PPP1CC	37 kDa	14	18581470	19115970	21602740	19495550	21539130	23434840	1.08717	0.308465
1502	Q8IWV2	Contactin-4	CNTN4	113 kDa	16	2137394	2084108	1017734	1441319	1144821	1407491	0.762254	0.373496
1503	P55081	Microfibrillar-associated protein 1	MFAP1	52 kDa	6	11547310	12657780	9971505	10855930	11444040	11030760	0.97525	0.75504
1504	P05023	Sodium/potassium-transporting ATPase subunit alpha-1	ATP1A1	113 kDa	18	76623370	73230370	130426500	103074300	98957040	117420000	1.13976	0.559912
1505	Q9UI10	Translation initiation factor eIF-2B subunit delta	EIF2B4	58 kDa	11	8194253	9136065	8831189	11715840	12464450	11956860	1.38131	0.000908607
1506	P46926	Glucosamine-6-phosphate isomerase 1	GNPDA1	33 kDa	11	36828950	44705070	49065350	41967620	45585760	43400820	1.00272	0.977215
1507	P27361	Mitogen-activated protein kinase 3	MAPK3	43 kDa	9	24899450	22295980	25508080	20059080	27337540	25159720	0.997976	0.984879
1508	O75489	NADH dehydrogenase [ubiquinone] iron-sulfur protein 3, mitochondrial	NDUFS3	30 kDa	7	5302715	5347225	7359252	7844979	5859723	6549762	1.12467	0.450449
1509	Q9H3S4	Thiamin pyrophosphokinase 1	TPK1	27 kDa	1	1249142	1230284	689798	826118	423714	641494	0.596779	0.13412
1510	P35251	Replication factor C subunit 1	RFC1	128 kDa	3	6965775	7239138	8901572	9053732	8971590	10175650	1.22048	0.0887371
1511	Q9Y3C4	EKC/KEOPS complex subunit TPRKB	TPRKB	20 kDa	4	2388589	3456144	4030869	3924543	4307354	3101903	1.14766	0.465795
1512	Q7L266	Isoaspartyl peptidase/L-asparaginase	ASRGL1	32 kDa	4	2685524	2760269	3308633	3651437	3487470	3765638	1.2456	0.0518075
1513	P47914	60S ribosomal protein L29	RPL29	18 kDa	1	7849434	8167136	15334410	10915440	14407380	10423460	1.1402	0.630919
1514	Q13242	Serine/arginine-rich splicing factor 9	SRSF9	26 kDa	8	38084190	44933150	44897350	41788430	43610750	43680050	1.0091	0.882713
1515	O43505	Beta-1,4-glucuronyltransferase 1	B4GAT1	47 kDa	4	3920736	4752497	2624208	2997818	3651108	3167177	0.868878	0.514821
1516	Q13057	Bifunctional coenzyme A synthase	COASY	62 kDa	6	2955803	3645860	5434975	4065109	4825531	4963123	1.15097	0.507571
1517	Q02543	60S ribosomal protein L18a	RPL18A	21 kDa	4	22250760	25650720	36807440	31995110	29613450	33397100	1.12155	0.52022
1518	P42858	Huntingtin	HTT	348 kDa	13	14531280	11384230	2110128	14401990	13184260	6214020	1.20605	0.694665
1519	Q9H267	Vacuolar protein sorting-associated protein 33B	VPS33B	71 kDa	9	4018972	6518211	6193857	3854910	5898498	2667738	0.742401	0.30869
1520	Q86X55	Histone-arginine methyltransferase CARM1	CARM1	66 kDa	11	1247218	1528276	1620869	2277406	691534	1373244	0.987676	0.97267
1521	Q9NQR4	Omega-amidase NIT2	NIT2	31 kDa	5	5066406	6453692	7033883	5794592	9391241	6683788	1.1787	0.433339
1522	Q9NXV6	CDKN2A-interacting protein	CDKN2AIP	61 kDa	16	18913320	26007220	27284380	23031460	24759380	25944130	1.02119	0.866707
1523	P48147	Prolyl endopeptidase	PREP	81 kDa	16	4501854	6053463	6578721	6303005	6883731	5638703	1.09872	0.487339
1524	Q13523	Serine/threonine-protein kinase PRP4 homolog	PRPF4B	117 kDa	12	16321010	18764720	17094960	19377580	19424060	17885200	1.08636	0.171503
1525	Q9Y3E5	Peptidyl-tRNA hydrolase 2, mitochondrial	PTRH2	19 kDa	3	521176	411309	841196	1144883	965088	1080744	1.79892	0.0514801
1526	Q9H7B2	Ribosome production factor 2 homolog	RPF2	36 kDa	6	5614517	10701590	8084379	6061058	9981155	8940615	1.02387	0.922934
1527	O75674	TOM1-like protein 1	TOM1L1	53 kDa	3	3413027	4639325	4258014	3783616	4499417	3596287	0.964985	0.769029
1528	P13051	Uracil-DNA glycosylase	UNG	35 kDa	5	4554254	5125147	6018055	4721245	5951249	6122646	1.06993	0.582982
1529	P40692	DNA mismatch repair protein Mlh1	MLH1	85 kDa	4	1916831	1888066	1922762	1489266	2095882	2245278	1.01794	0.895845
1530	Q9P2W9	Syntaxin-18	STX18	39 kDa	7	4476460	4512156	4640731	3353328	2980368	2442950	0.643952	0.0224871
1531	Q8WTS6	Histone-lysine N-methyltransferase SETD7	SETD7	41 kDa	6	22498880	27685060	29022330	31056850	26728690	28164580	1.08514	0.40379
1532	Q96K21	Abscission/NoCut checkpoint regulator	ZFYVE19	52 kDa	3	5658773	5549723	6784647	4409905	5485146	5012613	0.828519	0.113966
1533	Q9UDW1	Cytochrome b-c1 complex subunit 9	UQCR10	7 kDa	1	357254	235759	399160	699202	131290	208504	1.04719	0.939367
1534	Q8TBZ6	tRNA methyltransferase 10 homolog A	TRMT10A	40 kDa	7	1710015	2355531	2540860	1610905	1958263	1749284	0.805045	0.224262
1535	P52948	Nuclear pore complex protein Nup98-Nup96	NUP98	198 kDa	5	5752179	5765634	6394409	5421220	6035173	5652433	0.955148	0.390398
1536	P31483	Nucleolysin TIA-1 isoform p40	TIA1	43 kDa	8	5582173	5504083	5597578	4911321	5817446	5824361	0.992166	0.899157
1537	Q7Z4Q2	HEAT repeat-containing protein 3	HEATR3	75 kDa	8	10303280	10508800	11424610	12015200	13265950	13632260	1.20712	0.0248163
1538	Q58FG0	Putative heat shock protein HSP 90-alpha A5	HSP90AA5P	39 kDa	6	218434	1260244	483956	749571	709462	1097909	1.30281	0.602607
1539	Q9H8M7	Ubiquitin carboxyl-terminal hydrolase MINDY-3	MINDY3	50 kDa	3	2545587	1945187	2736045	2425322	2541641	1709757	0.923881	0.63083
1540	Q9NYK5	39S ribosomal protein L39, mitochondrial	MRPL39	39 kDa	3	2500300	2458274	2800971	3041595	3677928	3466474	1.31271	0.0297675
1541	Q15063	Periostin	POSTN	93 kDa	19	2105865	1372459	1784362	1527779	2225448	1005711	0.904279	0.708889
1542	O75150	E3 ubiquitin-protein ligase BRE1B	RNF40	114 kDa	13	6371933	7697373	9112332	7673855	7450652	8193947	1.0059	0.960158
1543	Q69YN4	Protein virilizer homolog	VIRMA	202 kDa	15	11305380	15457930	13586830	16485860	16093610	15205460	1.18426	0.166469
1544	Q9Y3P9	Rab GTPase-activating protein 1	RABGAP1	122 kDa	21	15120940	16745270	18478410	16330460	15965660	16447280	0.968195	0.638607
1545	Q16787	Laminin subunit alpha-3	LAMA3	367 kDa	11	16800720	15044610	11927800	13870020	15545480	14308180	0.99887	0.992108
1546	Q8N335	Glycerol-3-phosphate dehydrogenase 1-like protein	GPD1L	38 kDa	4	16245370	6546282	12726530	12990900	12314880	14160710	1.11116	0.690381
1547	P48047	ATP synthase subunit O, mitochondrial	ATP5PO	23 kDa	7	5753038	7290106	15963070	15192210	10141190	17833890	1.48821	0.29921
1548	Q8N4T8	Carbonyl reductase family member 4	CBR4	25 kDa	5	4669476	5067535	5613334	5859646	5679307	5963153	1.14018	0.109617
1549	Q96MH2	Protein HEXIM2	HEXIM2	32 kDa	3	1641030	2301437	2146483	2027679	1828149	1787472	0.92681	0.543434
1550	Q4V328	GRIP1-associated protein 1	GRIPAP1	96 kDa	19	10302850	10611000	13177600	9841030	10593800	10138500	0.896803	0.326067
1551	Q99933	BAG family molecular chaperone regulator 1	BAG1	39 kDa	9	15108510	19149750	91097410	41385430	28455110	55696230	1.00144	0.99832
1552	Q8IZL8	Proline-, glutamic acid- and leucine-rich protein 1	PELP1	120 kDa	6	4024121	4798090	4026070	5455062	5353117	5830222	1.29499	0.0212961
1553	Q9HD45	Transmembrane 9 superfamily member 3	TM9SF3	68 kDa	4	1613930	1916140	3873123	3253162	2527432	3484095	1.25145	0.483599
1554	Q0PNE2	Elongator complex protein 6	ELP6	30 kDa	4	4502857	5770150	5678702	5323669	6098346	5130659	1.03767	0.713136
1555	O00422	Histone deacetylase complex subunit SAP18	SAP18	18 kDa	4	4065975	5291873	6854987	5029356	6081770	5844174	1.04579	0.796588
1556	Q86VX9	Vacuolar fusion protein MON1 homolog A	MON1A	73 kDa	5	1685471	1874895	1921498	2031829	1759808	1549002	0.974238	0.78428
1557	Q9BRT2	Ubiquinol-cytochrome-c reductase complex assembly factor 2	UQCC2	15 kDa	4	3274186	3541647	5480962	3697895	4140816	5047750	1.04795	0.821106
1558	Q8IYB7	DIS3-like exonuclease 2	DIS3L2	99 kDa	23	20196200	22479130	23428540	23387570	23797150	25247830	1.09574	0.147551
1559	P08240	Signal recognition particle receptor subunit alpha	SRPRA	70 kDa	11	10303000	10726860	10697380	11418840	11121640	9214531	1.00088	0.990625
1560	P22466	Galanin peptides	GAL	13 kDa	3	1426830	1957487	1510013	1719902	1922137	1690646	1.08956	0.481506
1561	P15408	Fos-related antigen 2	FOSL2	35 kDa	3	1474062	2474897	1959403	1560376	1669561	1615459	0.820091	0.344655
1562	P11441	Ubiquitin-like protein 4A	UBL4A	18 kDa	5	9020304	11146650	11892550	9096178	9445376	11046620	0.922914	0.48115
1563	P24941	Cyclin-dependent kinase 2	CDK2	34 kDa	11	10567260	9634020	10676260	10733730	10675100	10506190	1.0336	0.40622
1564	O75752	UDP-GalNAc:beta-1,3-N-acetylgalactosaminyltransferase 1	B3GALNT1	40 kDa	6	17678020	14605480	16295440	15978240	13888970	16848790	0.961651	0.645216
1565	Q96HF1	Secreted frizzled-related protein 2	SFRP2	33 kDa	3	259397	229497	110625	104356	188923	207062	0.834571	0.586245
1566	Q03468	DNA excision repair protein ERCC-6	ERCC6	168 kDa	2	1232124	1562292	1393699	1037767	1255681	1077605	0.804909	0.0870962
1567	Q9HA77	Probable cysteine--tRNA ligase, mitochondrial	CARS2	62 kDa	6	10548110	7547255	11231020	12102370	10826360	11663840	1.17957	0.257064
1568	Q9Y3B2	Exosome complex component CSL4	EXOSC1	21 kDa	5	2901026	5865735	7468548	6737664	8200688	5946808	1.2864	0.377136
1569	P22732	Solute carrier family 2, facilitated glucose transporter member 5	SLC2A5	55 kDa	3	12133520	9913397	20967680	18295640	16481590	15103270	1.15962	0.572609
1570	Q66K74	Microtubule-associated protein 1S	MAP1S	112 kDa	11	5971566	5958899	7185733	7031435	8459075	7912939	1.22427	0.0700004
1571	Q9H6Z4	Ran-binding protein 3	RANBP3	60 kDa	11	23194730	33707210	26639360	28798800	31513320	28711410	1.06562	0.620744
1572	P48507	Glutamate--cysteine ligase regulatory subunit	GCLM	31 kDa	6	7273117	5917037	5437380	8254048	8294229	5848314	1.20234	0.276811
1573	Q9NRF8	CTP synthase 2	CTPS2	66 kDa	15	10401560	9476883	13560570	11657040	12778970	10843900	1.05505	0.684075
1574	P18858	DNA ligase 1	LIG1	102 kDa	8	5358509	4842754	5542476	5193194	6316653	5028422	1.05047	0.601932
1575	Q05D32	CTD small phosphatase-like protein 2	CTDSPL2	53 kDa	5	3824056	4890755	4541830	4234061	4713155	4293463	0.998796	0.98881
1576	Q9Y606	tRNA pseudouridine synthase A	PUS1	47 kDa	14	18066260	17965580	22170360	22301240	24280430	21581670	1.17115	0.12391
1577	O15357	Phosphatidylinositol 3,4,5-trisphosphate 5-phosphatase 2	INPPL1	139 kDa	14	9231128	9961492	11994490	11375590	12528540	12215930	1.15817	0.174799
1578	Q6IA86	Elongator complex protein 2	ELP2	92 kDa	7	7565823	6488899	7722871	7608174	8218824	7280539	1.06107	0.409191
1579	P00492	Hypoxanthine-guanine phosphoribosyltransferase	HPRT1	25 kDa	10	8249916	8729167	9183332	9678380	11538520	10095850	1.19686	0.0744389
1580	P40818	Ubiquitin carboxyl-terminal hydrolase 8	USP8	128 kDa	8	1929648	1288606	1756222	1322147	1896593	1432665	0.935054	0.700157
1581	Q9UMR5	Lysosomal thioesterase PPT2	PPT2	34 kDa	3	342780	382783	506646	301768	307858	268179	0.712382	0.131701
1582	O00410	Importin-5	IPO5	124 kDa	26	16131150	24198190	33445290	26706600	30404600	27045560	1.14073	0.563967
1583	Q6XQN6	Nicotinate phosphoribosyltransferase	NAPRT	58 kDa	9	11336230	11814320	16390280	15932010	17193600	14127800	1.19505	0.253622
1584	P30260	Cell division cycle protein 27 homolog	CDC27	92 kDa	12	11275030	13052380	14602580	14409410	14512360	15170030	1.13259	0.21062
1585	P36551	Oxygen-dependent coproporphyrinogen-III oxidase, mitochondrial	CPOX	50 kDa	7	4969781	5827067	5831265	4739407	5728343	4932624	0.926165	0.381812
1586	Q8NI99	Angiopoietin-related protein 6	ANGPTL6	52 kDa	6	873428	730762	722147	363830	713300	720734	0.772831	0.271372
1587	Q12824	SWI/SNF-related matrix-associated actin-dependent regulator of chromatin subfamily B member 1	SMARCB1	44 kDa	6	12897590	14566440	16147880	15762570	15634490	19714990	1.17197	0.209138
1588	Q9Y230	RuvB-like 2	RUVBL2	51 kDa	20	52011770	51388050	62452230	52546390	59811070	44889370	0.948115	0.63672
1589	Q96FN9	D-aminoacyl-tRNA deacylase 2	DTD2	19 kDa	3	1049754	1050414	1779864	1094929	1166675	1371677	0.936405	0.774152
1590	P43146	Netrin receptor DCC	DCC	158 kDa	9	22691490	21339420	18021530	18228410	15061700	16660000	0.804966	0.0820777
1591	Q7Z6E9	E3 ubiquitin-protein ligase RBBP6	RBBP6	202 kDa	9	6158676	6638087	7764429	7595987	6965629	7075913	1.05235	0.541493
1592	P55010	Eukaryotic translation initiation factor 5	EIF5	49 kDa	14	3912819	4724413	1827567	3987436	1941065	3078580	0.860703	0.669456
1593	O94763	Unconventional prefoldin RPB5 interactor 1	URI1	60 kDa	8	12562510	13829730	11989830	12555760	14719720	14816210	1.09665	0.254376
1594	Q6ZNJ1	Neurobeachin-like protein 2	NBEAL2	303 kDa	20	47884800	34559850	41228380	32424360	28807310	33436290	0.76547	0.115635
1595	Q9HB07	UPF0160 protein MYG1, mitochondrial	C12orf10	42 kDa	7	12004580	14307350	21522770	14196960	18521040	19300290	1.08746	0.698095
1596	Q96P16	Regulation of nuclear pre-mRNA domain-containing protein 1A	RPRD1A	36 kDa	8	16036290	16686340	15851050	14703500	15503360	17044400	0.972775	0.596673
1597	Q6PL24	Protein TMED8	TMED8	36 kDa	5	11709930	13032710	12816040	13764750	13807840	14059660	1.10846	0.0737277
1598	P13073	Cytochrome c oxidase subunit 4 isoform 1, mitochondrial	COX4I1	20 kDa	4	4684419	5330489	12341530	13283570	6731778	13525920	1.5003	0.323705
1599	Q14562	ATP-dependent RNA helicase DHX8	DHX8	139 kDa	14	6512545	5848674	6565566	7608107	7207834	8235726	1.21794	0.0244599
1600	Q9HCK4	Roundabout homolog 2	ROBO2	151 kDa	23	27890610	25012610	20333820	17558460	17932390	21903580	0.78368	0.125391
1601	P08123	Collagen alpha-2(I) chain	COL1A2	129 kDa	12	6219337	5018373	2949663	4354023	5377582	5015250	1.03944	0.866825
1602	P09525	Annexin A4	ANXA4	36 kDa	10	3828909	4747063	5242215	4447033	5709142	4147550	1.03514	0.810983
1603	P31949	Protein S100-A11	S100A11	12 kDa	4	147571200	198850500	189695500	174255000	163677600	164862900	0.937846	0.557297
1604	Q9BZI7	Regulator of nonsense transcripts 3B	UPF3B	58 kDa	10	14665070	19062020	15695820	14944570	16289770	15167580	0.938875	0.533512
1605	P15121	Aldo-keto reductase family 1 member B1	AKR1B1	36 kDa	10	16295010	26990390	41081200	26286980	28102980	24148420	0.930918	0.813201
1606	P55809	Succinyl-CoA:3-ketoacid coenzyme A transferase 1, mitochondrial	OXCT1	56 kDa	11	23874400	32035000	37503800	33977160	37578480	34811460	1.13867	0.390819
1607	P16112	Aggrecan core protein	ACAN	261 kDa	9	1554594	1481621	1404123	1887498	1328909	1372151	1.03338	0.811704
1608	P20073	Annexin A7	ANXA7	53 kDa	10	1319254	1785444	1948111	1722724	1616905	1787886	1.01479	0.908748
1609	Q14151	Scaffold attachment factor B2	SAFB2	107 kDa	7	22554410	22571970	28758700	19651280	25708690	23107390	0.926674	0.542497
1610	Q86TC9	Myopalladin	MYPN	145 kDa	6	4025738	7231615	6475717	5511249	6380313	6028299	1.01053	0.955405
1611	P49747	Cartilage oligomeric matrix protein	COMP	83 kDa	15	8696164	7029482	26585330	6780372	6444112	6426081	0.464432	0.350888
1612	O95202	Mitochondrial proton/calcium exchanger protein	LETM1	83 kDa	10	7428459	8090843	8608915	7920676	6689082	7770391	0.927551	0.323599
1613	A0MZ66	Shootin-1	SHTN1	72 kDa	11	4013839	4001712	4150972	4906099	4520328	4568191	1.15026	0.0251472
1614	Q6FI81	Anamorsin	CIAPIN1	34 kDa	8	14332300	21059600	18765200	16156470	15396480	17221110	0.900603	0.462471
1615	Q4G0F5	Vacuolar protein sorting-associated protein 26B	VPS26B	39 kDa	7	1781807	2917028	4021572	3058879	1950943	2919145	0.909243	0.742733
1616	Q9BUR4	Telomerase Cajal body protein 1	WRAP53	59 kDa	4	4484277	5223164	5924584	5611226	5309012	6072288	1.08703	0.405817
1617	Q6GQQ9	OTU domain-containing protein 7B	OTUD7B	93 kDa	4	1191567	2447719	1798573	1895144	1986648	1828769	1.05015	0.826192
1618	Q99700	Ataxin-2	ATXN2	140 kDa	9	3055204	3667984	5060507	4240514	4551304	4803456	1.15374	0.418052
1619	Q9H910	Jupiter microtubule associated homolog 2	JPT2	20 kDa	5	5872695	7864695	6725557	6375705	6691535	6283002	0.945623	0.589101
1620	Q8NI27	THO complex subunit 2	THOC2	183 kDa	17	10476550	28977090	24124860	14075420	31246410	19142840	1.01394	0.970579
1621	Q15269	Periodic tryptophan protein 2 homolog	PWP2	102 kDa	6	4479715	5095023	7119686	5750840	7611307	6718627	1.20284	0.313969
1622	Q7Z406	Myosin-14	MYH14	228 kDa	7	12333430	12318470	15807490	10391210	10448260	13914020	0.858972	0.311772
1623	Q9UPQ0	LIM and calponin homology domains-containing protein 1	LIMCH1	122 kDa	20	28774650	35137440	34712000	33627660	35309230	29189080	0.994949	0.954752
1624	Q96IJ6	Mannose-1-phosphate guanyltransferase alpha	GMPPA	46 kDa	4	700196	801015	1227422	851696	1450310	943000	1.18924	0.524237
1625	Q16560	U11/U12 small nuclear ribonucleoprotein 35 kDa protein	SNRNP35	29 kDa	1	122578	323975	295837	210498	329846	295627	1.12605	0.693858
1626	Q8WUR7	UPF0235 protein C15orf40	C15orf40	16 kDa	2	5648041	7243415	6771036	4992072	6811076	6312341	0.921322	0.51412
1627	P55265	Double-stranded RNA-specific adenosine deaminase	ADAR	136 kDa	12	25026350	26386250	31594420	28111160	31801640	30338470	1.08727	0.364229
1628	P51659	Peroxisomal multifunctional enzyme type 2	HSD17B4	80 kDa	14	19106740	20743370	29505500	26637250	22087530	30402560	1.14089	0.467224
1629	Q68CQ4	Digestive organ expansion factor homolog	DIEXF	87 kDa	9	6368254	5667646	4956985	7077560	6832872	8793667	1.33609	0.0710457
1630	O00273	DNA fragmentation factor subunit alpha	DFFA	37 kDa	5	3453561	3900877	3225325	2398554	2681258	3117332	0.774795	0.0512367
1631	Q96KQ7	Histone-lysine N-methyltransferase EHMT2	EHMT2	132 kDa	8	9308367	9884573	7652501	7329778	8431406	8917723	0.919296	0.432216
1632	Q9UNZ2	NSFL1 cofactor p47	NSFL1C	41 kDa	13	26748740	35363430	33570630	30217200	37782200	29942190	1.02361	0.847562
1633	Q15293	Reticulocalbin-1	RCN1	39 kDa	7	7746905	12745490	18635820	11570390	8958872	14523580	0.895846	0.726469
1634	O43709	Probable 18S rRNA (guanine-N(7))-methyltransferase	BUD23	32 kDa	1	422623	455541	1060503	843052	1075272	848067	1.42696	0.314821
1635	Q5VYK3	Proteasome adapter and scaffold protein ECM29	ECPAS	204 kDa	38	5152642	6714291	8029268	10005600	9314788	8370960	1.39179	0.0684557
1636	Q14432	cGMP-inhibited 3',5'-cyclic phosphodiesterase A	PDE3A	125 kDa	5	3407459	2357669	2375741	2775585	2532373	2008669	0.898753	0.548915
1637	Q96BJ3	Axin interactor, dorsalization-associated protein	AIDA	35 kDa	5	2895562	2826451	3891999	3061843	3826249	3681451	1.09939	0.492359
1638	Q9H3U1	Protein unc-45 homolog A	UNC45A	103 kDa	23	4792872	5938417	7276480	7445942	8349545	6101795	1.21599	0.253017
1639	Q66LE6	Serine/threonine-protein phosphatase 2A 55 kDa regulatory subunit B delta isoform	PPP2R2D	52 kDa	7	1939059	1298983	2790626	2517323	3426563	2165477	1.34513	0.293616
1640	O75152	Zinc finger CCCH domain-containing protein 11A	ZC3H11A	89 kDa	10	21601270	26458140	23125840	25400670	25213810	22627310	1.02889	0.709599
1641	P04183	Thymidine kinase, cytosolic	TK1	25 kDa	6	4300039	5595446	5600805	5117252	4754950	6068323	1.02867	0.812332
1642	Q52LJ0	Protein FAM98B	FAM98B	46 kDa	6	3571410	5073097	5080109	5528813	5263907	6279223	1.24389	0.145079
1643	Q9H4Z3	mRNA (2'-O-methyladenosine-N(6)-)-methyltransferase	PCIF1	81 kDa	7	5258662	5809480	6589905	3572913	4608792	4087954	0.694848	0.0236307
1644	Q8IWW6	Rho GTPase-activating protein 12	ARHGAP12	96 kDa	5	2087733	2507167	2396404	2313814	1747921	2236780	0.900907	0.353554
1645	O75312	Zinc finger protein ZPR1	ZPR1	51 kDa	10	12910390	17430640	19409060	17862010	16453890	17735920	1.04627	0.731839
1646	Q9BQL6	Fermitin family homolog 1	FERMT1	77 kDa	14	14874850	13431490	23724750	22526520	24038910	14796270	1.17933	0.510638
1647	Q9UNE7	E3 ubiquitin-protein ligase CHIP	STUB1	35 kDa	9	22901440	25759800	24341120	25473400	31416240	26510860	1.14244	0.19031
1648	Q9Y6A4	Cilia- and flagella-associated protein 20	CFAP20	23 kDa	4	8425326	7912748	8186735	10548630	9985781	7739916	1.15289	0.281018
1649	Q9Y2V2	Calcium-regulated heat-stable protein 1	CARHSP1	16 kDa	4	1083423	1050872	1560838	1523424	1099357	1288028	1.05837	0.745437
1650	Q15276	Rab GTPase-binding effector protein 1	RABEP1	99 kDa	13	261898	283015	278143	181744	280617	199892	0.804627	0.216221
1651	Q9ULA0	Aspartyl aminopeptidase	DNPEP	52 kDa	10	29577120	30884150	39504040	31234710	35828550	33521750	1.0062	0.955564
1652	P32929	Cystathionine gamma-lyase	CTH	45 kDa	8	17936080	21549320	21694870	22061990	22517960	20563200	1.06477	0.406981
1653	O43493	Trans-Golgi network integral membrane protein 2	TGOLN2	46 kDa	4	393712	607247	769189	502741	393512	556879	0.82091	0.444825
1654	Q7Z6B0	Coiled-coil domain-containing protein 91	CCDC91	50 kDa	6	2478954	3025405	3117393	2669845	2916999	2357314	0.921409	0.430649
1655	Q96JM3	Chromosome alignment-maintaining phosphoprotein 1	CHAMP1	89 kDa	11	20644600	21205850	23069700	19311850	21335720	18056190	0.904246	0.165167
1656	P49662	Caspase-4	CASP4	43 kDa	3	1399710	1380308	1824117	1339581	1489508	1599388	0.961848	0.743492
1657	Q9NRY5	Protein FAM114A2	FAM114A2	55 kDa	9	5358733	8513966	12464750	11109680	7904308	7475119	1.00576	0.98416
1658	Q8NI36	WD repeat-containing protein 36	WDR36	105 kDa	10	7251850	7654005	8826449	8510471	9234048	9123104	1.13211	0.144011
1659	O60927	E3 ubiquitin-protein ligase PPP1R11	PPP1R11	14 kDa	2	530881	347899	374249	512982	325508	382297	0.974269	0.899173
1660	Q07960	Rho GTPase-activating protein 1	ARHGAP1	50 kDa	8	5775157	5633789	7381498	5170067	6520917	6628299	0.974925	0.840696
1661	Q0VG06	Fanconi anemia core complex-associated protein 100	FAAP100	93 kDa	1	14912.7	20584.5	74196.7	81372.9	79128.5	60101.8	2.01108	0.180505
1662	O15014	Zinc finger protein 609	ZNF609	151 kDa	4	1635064	1844577	1883354	1896439	1898827	1876944	1.05766	0.312809
1663	P05771	Protein kinase C beta type	PRKCB	77 kDa	6	9896910	7943493	8771709	9370518	8661060	8810908	1.00866	0.908387
1664	Q9UKZ1	CCR4-NOT transcription complex subunit 11	CNOT11	55 kDa	4	2449714	2524791	3035680	2704322	2966747	2875864	1.06701	0.443077
1665	Q9BY32	Inosine triphosphate pyrophosphatase	ITPA	21 kDa	3	4927861	5083507	4420055	6547217	5590576	6108793	1.26436	0.0240257
1666	Q9H1B5	Xylosyltransferase 2	XYLT2	97 kDa	6	1681997	1087658	1109406	1229408	1124458	1615538	1.02329	0.908579
1667	Q16666	Gamma-interferon-inducible protein 16	IFI16	88 kDa	13	31127280	33257140	30060080	30557100	33315320	28127150	0.974113	0.673196
1668	P37837	Transaldolase	TALDO1	38 kDa	9	33475120	49102210	52527360	41846560	53360460	50221540	1.07641	0.645195
1669	Q8IVM0	Coiled-coil domain-containing protein 50	CCDC50	36 kDa	5	8377359	8417060	8798476	8997099	8554304	8101786	1.00236	0.949318
1670	Q9NYU2	UDP-glucose:glycoprotein glucosyltransferase 1	UGGT1	177 kDa	17	3689585	3804044	4216979	4014871	3316452	5130383	1.06414	0.688423
1671	Q15024	Exosome complex component RRP42	EXOSC7	32 kDa	5	3898556	4965864	5208355	6035180	6505491	4320906	1.19817	0.310091
1672	O60333	Kinesin-like protein KIF1B	KIF1B	204 kDa	13	5437136	5237095	4678076	4803261	5058447	5805132	1.02049	0.795565
1673	P33176	Kinesin-1 heavy chain	KIF5B	110 kDa	30	7944401	9694173	9371362	9896280	12947320	10639700	1.23967	0.129245
1674	Q8NI08	Nuclear receptor coactivator 7	NCOA7	106 kDa	19	7279844	8275591	8168634	8427287	8574663	8313622	1.06708	0.230926
1675	P05067	Amyloid-beta precursor protein	APP	87 kDa	13	2169204	1523645	2279147	1563916	1625731	1773574	0.831082	0.287527
1676	O00401	Neural Wiskott-Aldrich syndrome protein	WASL	55 kDa	4	5791247	5983701	3674142	5958101	6707615	6681925	1.25235	0.214729
1677	Q03405	Urokinase plasminogen activator surface receptor	PLAUR	37 kDa	3	863138	761234	1139347	1013723	918034	1179567	1.12577	0.449494
1678	P30519	Heme oxygenase 2	HMOX2	36 kDa	5	5064087	7036996	7253801	6949755	6020282	6510207	1.00648	0.959405
1679	Q01844	RNA-binding protein EWS	EWSR1	68 kDa	5	119162700	111562600	163750200	121168400	120943200	139789500	0.968124	0.82784
1680	Q13825	Methylglutaconyl-CoA hydratase, mitochondrial	AUH	36 kDa	3	4398039	4096450	5790350	4901587	4398715	5095029	1.00773	0.952377
1681	Q86WA6	Valacyclovir hydrolase	BPHL	33 kDa	4	7089117	7984793	9758128	8260195	7621375	8640288	0.987509	0.9109
1682	P30408	Transmembrane 4 L6 family member 1	TM4SF1	22 kDa	1	258044	367142	482733	280395	446582	639054	1.23297	0.527283
1683	Q765P7	Protein MTSS 2	MTSS2	80 kDa	3	150605	153366	215715	237026	232234	146746	1.18534	0.429972
1684	Q96B36	Proline-rich AKT1 substrate 1	AKT1S1	27 kDa	4	3675926	7124566	5703497	3414939	3877255	3984259	0.683256	0.221187
1685	Q13033	Striatin-3	STRN3	87 kDa	9	2393017	3200892	3614250	3067927	3323958	3275966	1.04992	0.713775
1686	Q969E8	Pre-rRNA-processing protein TSR2 homolog	TSR2	21 kDa	2	8924158	13321020	11636260	7119335	10274680	13259760	0.904737	0.650935
1687	P16401	Histone H1.5	H1-5	23 kDa	2	387373600	448501500	514645000	459850600	562935600	447116000	1.0884	0.486099
1688	P52735	Guanine nucleotide exchange factor VAV2	VAV2	101 kDa	7	2625787	2466441	3695273	3236038	1926433	2937256	0.921733	0.699758
1689	P26440	Isovaleryl-CoA dehydrogenase, mitochondrial	IVD	47 kDa	5	6373760	6532662	7175562	7191929	7693528	5870039	1.03354	0.733527
1690	Q658Y4	Protein FAM91A1	FAM91A1	94 kDa	6	3707623	6353651	6150304	5240149	6499487	6460342	1.12265	0.535376
1691	Q16822	Phosphoenolpyruvate carboxykinase [GTP], mitochondrial	PCK2	71 kDa	14	9342740	11107090	15967590	15355470	14038360	13132190	1.16774	0.415724
1692	P25685	DnaJ homolog subfamily B member 1	DNAJB1	38 kDa	12	17474330	19123400	19669520	22156680	22006660	21359700	1.1645	0.0307662
1693	Q96IY4	Carboxypeptidase B2	CPB2	48 kDa	6	11352020	9505613	9970158	9366620	8439945	9622656	0.889756	0.173399
1694	Q6I9Y2	THO complex subunit 7 homolog	THOC7	24 kDa	8	13216110	16379730	24099130	16473320	14913860	18683580	0.932504	0.75149
1695	P11177	Pyruvate dehydrogenase E1 component subunit beta, mitochondrial	PDHB	39 kDa	3	957136	1556073	2750871	1740164	1758145	2228560	1.08791	0.802121
1696	Q96T37	RNA-binding protein 15	RBM15	107 kDa	4	1267220	1296594	1323155	1737458	1827791	1249031	1.23857	0.226938
1697	Q9Y5X2	Sorting nexin-8	SNX8	53 kDa	7	2113785	2128817	3420098	3427605	3771671	3195186	1.3565	0.159183
1698	Q9BSL1	Ubiquitin-associated domain-containing protein 1	UBAC1	45 kDa	7	7231385	7399122	8579466	7383995	8328294	8218572	1.03106	0.669733
1699	O75496	Geminin	GMNN	24 kDa	3	5915958	7418670	6215869	6842587	5894918	7461540	1.03317	0.754993
1700	P30876	DNA-directed RNA polymerase II subunit RPB2	POLR2B	134 kDa	20	12443950	14040910	19524340	20756150	19234590	18947880	1.28102	0.175756
1701	Q04756	Hepatocyte growth factor activator	HGFAC	71 kDa	9	173567	367933	325462	671159	166219	398801	1.42588	0.498363
1702	O60518	Ran-binding protein 6	RANBP6	125 kDa	9	2485724	2289862	3068779	3691947	3705926	3151920	1.34489	0.0414023
1703	O60524	Nuclear export mediator factor NEMF	NEMF	123 kDa	7	3312613	4883580	4675637	3221114	3364897	4047246	0.826087	0.27122
1704	P30040	Endoplasmic reticulum resident protein 29	ERP29	29 kDa	6	16224190	19023590	34616590	34834830	19801670	29069240	1.19812	0.559006
1705	P07357	Complement component C8 alpha chain	C8A	65 kDa	3	54123760	28234430	44594370	48813130	50915450	41551440	1.11286	0.602441
1706	Q68EM7	Rho GTPase-activating protein 17	ARHGAP17	95 kDa	10	2533772	2475228	2154381	2617837	2566489	2533834	1.07745	0.254821
1707	Q9Y5L4	Mitochondrial import inner membrane translocase subunit Tim13	TIMM13	11 kDa	5	77116940	100588900	104492900	94196190	99806180	104414700	1.05747	0.600322
1708	Q5T1V6	Probable ATP-dependent RNA helicase DDX59	DDX59	69 kDa	12	314745900	287843200	188692200	9660607	76055430	9769567	0.120672	0.0114928
1709	Q9BRP8	Partner of Y14 and mago	PYM1	23 kDa	5	8271258	11931070	11290460	8530931	13086350	9141393	0.976689	0.899853
1710	P17936	Insulin-like growth factor-binding protein 3	IGFBP3	32 kDa	9	170345200	197213300	145045300	142534900	136592400	122598400	0.783696	0.119965
1711	Q969H6	Ribonuclease P/MRP protein subunit POP5	POP5	19 kDa	2	4294142	6490081	7871675	8462939	7961253	7886615	1.30312	0.209326
1712	Q96T76	MMS19 nucleotide excision repair protein homolog	MMS19	113 kDa	17	2525063	2785838	3035346	3723501	3816096	3680049	1.34427	0.0172802
1713	P30533	Alpha-2-macroglobulin receptor-associated protein	LRPAP1	41 kDa	3	3621667	4904747	5808179	5276597	4410132	3249453	0.902445	0.618498
1714	P51649	Succinate-semialdehyde dehydrogenase, mitochondrial	ALDH5A1	57 kDa	5	6784729	7769213	9867906	8721321	9007784	8001898	1.05361	0.686054
1715	Q9UBI1	COMM domain-containing protein 3	COMMD3	22 kDa	3	6469343	5671885	5833961	5970969	5654401	4739699	0.910425	0.301055
1716	O94992	Protein HEXIM1	HEXIM1	41 kDa	5	27111950	34462050	33845240	29704500	31463120	29385590	0.949004	0.566825
1717	Q9H204	Mediator of RNA polymerase II transcription subunit 28	MED28	20 kDa	1	316845	294092	69817.9	102589	986866	288927	2.02478	0.482995
1718	P43246	DNA mismatch repair protein Msh2	MSH2	105 kDa	14	8521785	11161200	12560860	10174440	12736460	10738810	1.0436	0.759838
1719	Q8TEU8	WAP, Kazal, immunoglobulin, Kunitz and NTR domain-containing protein 2	WFIKKN2	64 kDa	7	2858154	2321929	1874792	2042419	1579545	2098170	0.810806	0.263086
1720	Q5JVF3	PCI domain-containing protein 2	PCID2	46 kDa	11	1561125	2757509	2543394	2235081	2504237	3693934	1.22897	0.419474
1721	Q5T7V8	RAB6-interacting golgin	GORAB	45 kDa	2	743027	1647840	989013	1264379	1027192	1198517	1.03261	0.906063
1722	Q96PC5	Melanoma inhibitory activity protein 2	MIA2	160 kDa	7	2176323	2407459	2281403	2053185	1856288	1935199	0.85135	0.0188461
1723	Q99832	T-complex protein 1 subunit eta	CCT7	59 kDa	19	18327430	17428370	27079170	25881620	29651350	27418370	1.32015	0.150539
1724	Q9UKM7	Endoplasmic reticulum mannosyl-oligosaccharide 1,2-alpha-mannosidase	MAN1B1	80 kDa	11	4230860	3856642	4966819	4183452	4404480	4339963	0.990315	0.909999
1725	Q99567	Nuclear pore complex protein Nup88	NUP88	84 kDa	9	9325502	11973300	12925800	11109970	11594560	11897320	1.01102	0.918739
1726	Q13405	39S ribosomal protein L49, mitochondrial	MRPL49	19 kDa	5	5576549	8305657	6473485	6379725	5993959	6132731	0.909152	0.52395
1727	Q9Y3X0	Coiled-coil domain-containing protein 9	CCDC9	60 kDa	8	16536870	21946770	17692840	16431520	18756890	16851880	0.926371	0.50307
1728	Q15054	DNA polymerase delta subunit 3	POLD3	51 kDa	2	3377004	4604872	3570544	2596850	2738008	3032302	0.724278	0.0961158
1729	O14646	Chromodomain-helicase-DNA-binding protein 1	CHD1	197 kDa	7	2171804	2563791	3151463	3033830	3513158	2794692	1.18443	0.248738
1730	Q03188	Centromere protein C	CENPC	107 kDa	6	3682240	3512973	2198282	3073406	3497225	3271660	1.04778	0.783648
1731	Q8TER0	Sushi, nidogen and EGF-like domain-containing protein 1	SNED1	152 kDa	5	5246776	4139039	4997715	4409793	4216243	5018125	0.948596	0.586235
1732	Q96C19	EF-hand domain-containing protein D2	EFHD2	27 kDa	9	11928170	16302170	18748230	14920090	20458550	14565930	1.06314	0.738354
1733	P54652	Heat shock-related 70 kDa protein 2	HSPA2	70 kDa	19	6968559	11633730	5942741	6579400	12297450	6916292	1.05085	0.878295
1734	Q15785	Mitochondrial import receptor subunit TOM34	TOMM34	35 kDa	7	15307040	15933910	18849450	20411620	21527280	19852940	1.23361	0.0525765
1735	Q96C57	Protein CUSTOS	CUSTOS	28 kDa	3	6494501	9068715	6905055	7780276	9169237	6433331	1.04071	0.799489
1736	Q8NHZ8	Anaphase-promoting complex subunit CDC26	CDC26	10 kDa	2	5582890	5447156	6571776	5450536	5473247	5624154	0.940126	0.426541
1737	Q5JVS0	Intracellular hyaluronan-binding protein 4	HABP4	46 kDa	4	664186	527832	550726	618073	690691	601393	1.09606	0.338702
1738	Q9BRX5	DNA replication complex GINS protein PSF3	GINS3	25 kDa	5	21421820	25651280	22903780	19848020	26620500	23821880	1.00448	0.966649
1739	O76071	Probable cytosolic iron-sulfur protein assembly protein CIAO1	CIAO1	38 kDa	6	11443330	11072280	10872500	11307630	10526390	10931560	0.981355	0.504173
1740	Q9Y4B6	DDB1- and CUL4-associated factor 1	DCAF1	169 kDa	6	6524376	7244250	7183800	7415681	7775648	8413502	1.12659	0.0796367
1741	P02647	Apolipoprotein A-I	APOA1	31 kDa	5	3322108	3377130	3097370	2326433	2488655	2602741	0.757183	0.00253263
1742	Q9BRS2	Serine/threonine-protein kinase RIO1	RIOK1	66 kDa	2	1590848	2304764	2136176	2287641	2232952	1910034	1.06612	0.62474
1743	Q8WX92	Negative elongation factor B	NELFB	66 kDa	11	15940930	18833720	22165880	20137130	21619610	20624460	1.09555	0.421003
1744	Q99715	Collagen alpha-1(XII) chain	COL12A1	333 kDa	61	39518270	41948040	36204980	32975860	41311300	32052840	0.903704	0.341762
1745	Q969X6	U3 small nucleolar RNA-associated protein 4 homolog	UTP4	77 kDa	7	6392093	7615361	10304600	11046840	10867630	8649200	1.25714	0.218113
1746	Q92636	Protein FAN	NSMAF	104 kDa	8	4806453	5920715	5713500	6079199	6558743	6088732	1.13905	0.142349
1747	Q8N142	Adenylosuccinate synthetase isozyme 1	ADSS1	50 kDa	10	4082181	3976270	5871360	5084701	5528425	5614326	1.16494	0.33863
1748	O43708	Maleylacetoacetate isomerase	GSTZ1	24 kDa	3	4218799	2465125	6289456	6680201	5249824	5121693	1.31436	0.349644
1749	O94985	Calsyntenin-1	CLSTN1	110 kDa	15	42321140	44915500	30199050	28519980	35208500	32734200	0.821409	0.260642
1750	Q8WX93	Palladin	PALLD	151 kDa	19	25714510	25259060	24907490	26757460	28034380	24174020	1.04065	0.462306
1751	O75448	Mediator of RNA polymerase II transcription subunit 24	MED24	110 kDa	3	896342	571895	1317027	1067419	1096910	1397789	1.27892	0.362161
1752	P35556	Fibrillin-2	FBN2	315 kDa	35	3963481	3874387	2512712	3773179	3198007	2415267	0.906853	0.628364
1753	Q5BKZ1	DBIRD complex subunit ZNF326	ZNF326	66 kDa	6	6073028	6536558	5635924	7857004	7264466	6775349	1.20012	0.0419467
1754	Q15424	Scaffold attachment factor B1	SAFB	103 kDa	11	18226670	21662360	20367400	20031960	20767390	21317640	1.03088	0.609083
1755	Q99808	Equilibrative nucleoside transporter 1	SLC29A1	50 kDa	5	2785514	3278236	3826047	3748906	3314199	3512687	1.06936	0.538738
1756	Q6WKZ4	Rab11 family-interacting protein 1	RAB11FIP1	137 kDa	9	11733460	15355790	14153930	13286180	13287830	13708290	0.976702	0.792902
1757	Q9NVM6	DnaJ homolog subfamily C member 17	DNAJC17	35 kDa	7	516987	604078	377383	448193	438128	494129	0.921253	0.616356
1758	Q9H3N1	Thioredoxin-related transmembrane protein 1	TMX1	32 kDa	5	3733108	4211316	7610572	8596920	4835444	9241492	1.45766	0.267097
1759	P06702	Protein S100-A9	S100A9	13 kDa	4	2415349	779613	1485578	872186	2147928	1154686	0.891948	0.796987
1760	P01860	Immunoglobulin heavy constant gamma 3	IGHG3	41 kDa	7	1629705	1580893	1069651	1149198	1020346	1194429	0.785929	0.225103
1761	Q9BVC4	Target of rapamycin complex subunit LST8	MLST8	36 kDa	3	762997	1091479	1260247	1326234	1145171	1132827	1.15716	0.387053
1762	Q99747	Gamma-soluble NSF attachment protein	NAPG	35 kDa	8	4899591	6157905	6511844	6324412	5789893	5946906	1.028	0.775383
1763	P50402	Emerin	EMD	29 kDa	4	2098873	3275239	4177013	4072574	2875012	4074287	1.15399	0.539717
1764	P53007	Tricarboxylate transport protein, mitochondrial	SLC25A1	34 kDa	3	196202	122045	872246	725488	281478	978270	1.66758	0.447113
1765	Q9UBU9	Nuclear RNA export factor 1	NXF1	70 kDa	7	8683408	8198870	10012120	10850470	11335970	10087090	1.20001	0.0597787
1766	Q9UBG0	C-type mannose receptor 2	MRC2	167 kDa	14	1454939	1260149	1393371	1189490	1380184	1332479	0.949785	0.444542
1767	P10124	Serglycin	SRGN	18 kDa	1	22270560	17844460	19323280	26551760	24313800	23447790	1.25026	0.0413435
1768	Q99549	M-phase phosphoprotein 8	MPHOSPH8	97 kDa	4	2646374	5002996	6464273	3031440	4138125	9786755	1.20141	0.715579
1769	Q99447	Ethanolamine-phosphate cytidylyltransferase	PCYT2	44 kDa	11	4850923	8787210	8534032	6552740	7167358	14204820	1.25946	0.537783
1770	Q8N8S7	Protein enabled homolog	ENAH	67 kDa	14	5614425	6535991	6736110	5804137	6808982	6625868	1.01866	0.812517
1771	Q9BQP7	Mitochondrial genome maintenance exonuclease 1	MGME1	39 kDa	9	5676975	6827570	7601711	7764796	6483244	6217077	1.01785	0.878866
1772	Q15165	Serum paraoxonase/arylesterase 2	PON2	39 kDa	2	63272	34097.6	169662	284998	91888.9	223695	2.24911	0.195817
1773	Q8IWZ8	SURP and G-patch domain-containing protein 1	SUGP1	72 kDa	9	9142647	10408560	8727452	9016551	8581142	9870355	0.971335	0.692486
1774	O75792	Ribonuclease H2 subunit A	RNASEH2A	33 kDa	3	4849602	5721818	5489556	5266705	5466580	6363006	1.06446	0.466187
1775	Q13112	Chromatin assembly factor 1 subunit B	CHAF1B	61 kDa	8	18429840	20268710	21811470	20690370	21619800	20425720	1.03679	0.536353
1776	P15170	Eukaryotic peptide chain release factor GTP-binding subunit ERF3A	GSPT1	56 kDa	13	99168.1	222306	117694	120780	31030.5	202607	0.807019	0.676776
1777	Q13885	Tubulin beta-2A chain	TUBB2A	50 kDa	20	3855130	3881041	3478533	3093475	2961647	2816523	0.791073	0.0112092
1778	Q99575	Ribonucleases P/MRP protein subunit POP1	POP1	115 kDa	14	13343250	14466430	18392360	19751320	21136640	18106740	1.27689	0.0893911
1779	P21912	Succinate dehydrogenase [ubiquinone] iron-sulfur subunit, mitochondrial	SDHB	32 kDa	7	4960017	4098277	5881180	6080434	6522384	6394676	1.27163	0.111578
1780	Q12933	TNF receptor-associated factor 2	TRAF2	56 kDa	2	370009	604619	490219	799755	1408469	649154	1.95063	0.176146
1781	Q9H3K6	BolA-like protein 2	BOLA2	10 kDa	3	9843721	16510010	17289900	15349050	14245450	13347490	0.983923	0.931334
1782	Q8IZC6	Collagen alpha-1(XXVII) chain	COL27A1	187 kDa	5	10219040	9436130	7705067	8638808	7844557	7285809	0.868749	0.248373
1783	Q92506	Estradiol 17-beta-dehydrogenase 8	HSD17B8	27 kDa	6	14861960	14130330	18057940	16259790	19966070	12693790	1.03973	0.812607
1784	P52565	Rho GDP-dissociation inhibitor 1	ARHGDIA	23 kDa	5	4036369	3701140	5489852	4758407	4341340	5397255	1.09599	0.547262
1785	Q13425	Beta-2-syntrophin	SNTB2	58 kDa	11	6568688	6638510	7721565	8307180	8159321	7984030	1.16827	0.0800902
1786	P51148	Ras-related protein Rab-5C	RAB5C	23 kDa	8	729882	1054889	915412	824327	995059	914398	1.01244	0.922668
1787	P53675	Clathrin heavy chain 2	CLTCL1	187 kDa	15	915150	1001448	1770634	1637299	1452450	1239496	1.17412	0.526358
1788	P49959	Double-strand break repair protein MRE11	MRE11	81 kDa	8	5279419	4623150	4914892	5275873	6642235	6345724	1.23259	0.0923021
1789	Q16775	Hydroxyacylglutathione hydrolase, mitochondrial	HAGH	34 kDa	8	4718799	4925659	5847801	4121715	4740812	6346163	0.981696	0.90741
1790	O60443	Gasdermin-E	GSDME	55 kDa	7	9205107	9444588	12458050	11227460	11145820	11274950	1.08167	0.503481
1791	P54278	Mismatch repair endonuclease PMS2	PMS2	96 kDa	4	2809070	1200316	974018	875012	799342	2367027	0.810968	0.704912
1792	P42696	RNA-binding protein 34	RBM34	49 kDa	7	4789138	6255888	6089126	5640982	6845856	6165327	1.0886	0.435861
1793	Q8IZ52	Chondroitin sulfate synthase 2	CHPF	85 kDa	6	304930	171768	175151	228986	212013	409424	1.30463	0.443334
1794	Q92688	Acidic leucine-rich nuclear phosphoprotein 32 family member B	ANP32B	29 kDa	7	193854400	243932700	160104300	247854900	254770900	235822500	1.23509	0.189459
1795	Q8N1G2	Cap-specific mRNA (nucleoside-2'-O-)-methyltransferase 1	CMTR1	95 kDa	18	10492580	12957270	13768330	12725330	16096000	14017770	1.15103	0.249162
1796	Q8NBJ5	Procollagen galactosyltransferase 1	COLGALT1	72 kDa	9	8439732	7201680	13542780	12169050	9593846	11830640	1.15109	0.540333
1797	Q99523	Sortilin	SORT1	92 kDa	5	6245244	7639849	5882530	5907929	6137696	5367583	0.880895	0.279524
1798	P62995	Transformer-2 protein homolog beta	TRA2B	34 kDa	2	3969278	4043888	5391895	5935685	5709486	4416349	1.19817	0.251798
1799	Q09328	Alpha-1,6-mannosylglycoprotein 6-beta-N-acetylglucosaminyltransferase A	MGAT5	85 kDa	6	3491298	3282021	3278283	3503843	3557970	3247452	1.02563	0.513227
1800	Q96PL1	Secretoglobin family 3A member 2	SCGB3A2	10 kDa	1	1881735	1544795	1324015	1535481	1364395	1392779	0.903613	0.450819
1801	A0AVT1	Ubiquitin-like modifier-activating enzyme 6	UBA6	118 kDa	23	18190050	14318470	15733590	20820310	22101990	17282270	1.24797	0.0989694
1802	O14964	Hepatocyte growth factor-regulated tyrosine kinase substrate	HGS	86 kDa	13	7489274	9309522	9771530	7578627	8924383	7734895	0.912217	0.405019
1803	O75891	Cytosolic 10-formyltetrahydrofolate dehydrogenase	ALDH1L1	99 kDa	12	75969970	56163850	41705560	36880700	58882360	32447370	0.737522	0.304735
1804	O94776	Metastasis-associated protein MTA2	MTA2	75 kDa	15	25603730	24336450	24803670	27229310	35356640	30164030	1.2409	0.124215
1805	Q8TAF3	WD repeat-containing protein 48	WDR48	76 kDa	9	17636570	14565340	19256270	15651940	16105720	16571550	0.939194	0.529469
1806	P10145	Interleukin-8	CXCL8	11 kDa	1	7411538	5775487	7277910	22456310	24153590	24793980	3.48908	7.11439e-05
1807	Q96B26	Exosome complex component RRP43	EXOSC8	30 kDa	5	33274340	39506560	39433710	36920650	41041530	38483300	1.0377	0.593961
1808	Q9Y697	Cysteine desulfurase, mitochondrial	NFS1	50 kDa	5	3644083	2830439	4085630	3891282	3645072	3614206	1.05591	0.649742
1809	P18583	Protein SON	SON	264 kDa	7	13210910	15342960	13574710	13950630	14611550	15332620	1.04192	0.495548
1810	Q9BVL2	Nucleoporin p58/p45	NUP58	61 kDa	3	3125849	2600459	3128753	1999882	1860115	2103076	0.673408	0.0200413
1811	Q96IZ0	PRKC apoptosis WT1 regulator protein	PAWR	37 kDa	2	916139	2737025	1294503	348993	2523478	316405	0.644521	0.559787
1812	Q8IWD4	Coiled-coil domain-containing protein 117	CCDC117	31 kDa	5	5628485	8043130	5452481	5398375	5100749	6542388	0.891102	0.515044
1813	P40939	Trifunctional enzyme subunit alpha, mitochondrial	HADHA	83 kDa	12	6424169	6166247	14259800	15503210	9767100	16263750	1.54688	0.222777
1814	O14562	Ubiquitin domain-containing protein UBFD1	UBFD1	33 kDa	6	10425660	10389590	12100560	11799720	11728190	12751160	1.10218	0.178481
1815	Q9HCN4	GPN-loop GTPase 1	GPN1	42 kDa	4	552458	963888	730009	1068678	1511244	770772	1.49161	0.227867
1816	Q9Y388	RNA-binding motif protein, X-linked 2	RBMX2	37 kDa	3	1301190	1417570	1365117	1604791	1530163	1213462	1.06478	0.543639
1817	Q9Y394	Dehydrogenase/reductase SDR family member 7	DHRS7	38 kDa	2	500578	561461	1414540	2034550	959954	2236168	2.11206	0.142441
1818	Q9GZN8	UPF0687 protein C20orf27	C20orf27	19 kDa	2	924603	908984	1226590	715363	1214526	938194	0.937228	0.738409
1819	P07910	Heterogeneous nuclear ribonucleoproteins C1/C2	HNRNPC	34 kDa	6	388543300	479661500	156550500	465013100	467636600	529729700	1.42705	0.266167
1820	O15504	Nucleoporin NUP42	NUP42	45 kDa	3	1830619	2751941	2263551	2153364	2052704	2051853	0.914084	0.538807
1821	Q6ZMP0	Thrombospondin type-1 domain-containing protein 4	THSD4	112 kDa	8	2373739	2523215	2448047	1373737	2093435	1852234	0.724221	0.0801869
1822	Q9H9A5	CCR4-NOT transcription complex subunit 10	CNOT10	82 kDa	10	6954449	7893927	7501273	9326792	9105701	7671547	1.16798	0.121623
1823	Q9NR09	Baculoviral IAP repeat-containing protein 6	BIRC6	530 kDa	13	7175113	7805843	8117404	7689585	8575727	7863935	1.04463	0.425498
1824	Q8N668	COMM domain-containing protein 1	COMMD1	21 kDa	2	432971	835670	958455	549094	772707	633044	0.877756	0.637835
1825	Q15847	Adipogenesis regulatory factor	ADIRF	8 kDa	1	151805	757483	513019	384175	616747	68031.5	0.751563	0.645713
1826	P05026	Sodium/potassium-transporting ATPase subunit beta-1	ATP1B1	35 kDa	2	7516285	8052505	13352360	9828958	8695076	11007030	1.02109	0.925808
1827	Q9P016	Thymocyte nuclear protein 1	THYN1	26 kDa	5	4661572	2546076	6892844	5020726	5134942	4577897	1.0449	0.8825
1828	Q86VN1	Vacuolar protein-sorting-associated protein 36	VPS36	44 kDa	12	1578008	3040096	2360023	2447652	2431601	2581283	1.06913	0.740793
1829	Q16401	26S proteasome non-ATPase regulatory subunit 5	PSMD5	56 kDa	12	9284330	12922930	16906720	13785100	13207510	12359310	1.00608	0.974778
1830	Q9H2W6	39S ribosomal protein L46, mitochondrial	MRPL46	32 kDa	1	520015	582824	837985	741287	671582	732344	1.10531	0.559071
1831	Q9BRR6	ADP-dependent glucokinase	ADPGK	54 kDa	3	2129226	2611102	2080361	2179682	1979367	2627258	0.994959	0.966423
1832	Q9HAS0	Protein Njmu-R1	C17orf75	45 kDa	4	1018133	920337	1112353	1571207	1401709	566645	1.1602	0.65419
1833	P06748	Nucleophosmin	NPM1	33 kDa	4	239122300	271322600	111139900	277898200	254707700	336963700	1.39896	0.229656
1834	P68366	Tubulin alpha-4A chain	TUBA4A	50 kDa	12	601211100	602464000	596268900	639299100	601752600	493158500	0.96348	0.666746
1835	P26447	Protein S100-A4	S100A4	12 kDa	3	171203600	229331200	292300100	200236500	216632600	218195700	0.916618	0.638842
1836	P08962	CD63 antigen	CD63	26 kDa	2	15046480	14462970	14410830	14220790	12826500	13766800	0.929277	0.111186
1837	P56134	ATP synthase subunit f, mitochondrial	ATP5MF	11 kDa	2	325922	627882	4129429	5411443	1584687	5695268	2.49672	0.232499
1838	Q92576	PHD finger protein 3	PHF3	229 kDa	5	3175537	3673529	3436423	3765262	4198960	3521906	1.11673	0.184071
1839	Q86UE4	Protein LYRIC	MTDH	64 kDa	12	70486340	92554140	83349270	75298240	70683500	79491210	0.915107	0.395615
1840	Q9H4A6	Golgi phosphoprotein 3	GOLPH3	34 kDa	5	12529680	11456160	12632690	11815010	14575640	14336920	1.11221	0.258251
1841	P01266	Thyroglobulin	TG	305 kDa	4	123359400	141992200	105677200	98997250	115814900	124425600	0.914316	0.46119
1842	Q7Z794	Keratin, type II cytoskeletal 1b	KRT77	62 kDa	17	242077300	150825000	93858300	54832850	110443100	61982520	0.466879	0.172714
1843	Q9UJX3	Anaphase-promoting complex subunit 7	ANAPC7	67 kDa	11	8654320	11867750	15056110	14760200	13289100	13185270	1.15898	0.417127
1844	Q9UBP6	tRNA (guanine-N(7)-)-methyltransferase	METTL1	31 kDa	8	6785801	5665375	10204490	8616282	8534734	8363096	1.12617	0.557596
1845	Q7Z6M1	Rab9 effector protein with kelch motifs	RABEPK	41 kDa	7	13484480	18373930	15801820	16692300	18526430	16785330	1.09114	0.421716
1846	Q13541	Eukaryotic translation initiation factor 4E-binding protein 1	EIF4EBP1	13 kDa	1	1375629	1289938	1829239	1341423	1241847	1408542	0.888094	0.424655
1847	O95825	Quinone oxidoreductase-like protein 1	CRYZL1	39 kDa	6	4260886	5143022	6261035	4671809	5642605	5719776	1.02357	0.865179
1848	P36575	Arrestin-C	ARR3	43 kDa	2	24299630	26329760	19953290	22999790	22118790	20852700	0.934667	0.506161
1849	Q9H583	HEAT repeat-containing protein 1	HEATR1	242 kDa	19	4007740	3740773	4485109	6029159	4444514	4715847	1.24162	0.170944
1850	Q14247	Src substrate cortactin	CTTN	62 kDa	14	34433840	40077800	35518460	40531610	47196280	36375910	1.12791	0.280187
1851	O75976	Carboxypeptidase D	CPD	153 kDa	11	5281860	4032352	3265942	4079901	3984390	4027299	0.961164	0.80775
1852	Q86WR7	Proline and serine-rich protein 2	PROSER2	46 kDa	1	690537	873704	625839	841432	787266	1020532	1.20965	0.209365
1853	Q15014	Mortality factor 4-like protein 2	MORF4L2	32 kDa	7	5522570	6043999	5807586	6700939	6867485	5645926	1.10592	0.245541
1854	Q6ZVK8	8-oxo-dGDP phosphatase NUDT18	NUDT18	36 kDa	1	88044.6	144179	138648	129579	296726	173481	1.61723	0.263283
1855	P04275	von Willebrand factor	VWF	309 kDa	10	84822140	69561450	38509840	40903870	53195970	39115640	0.690617	0.27908
1856	Q5JSH3	WD repeat-containing protein 44	WDR44	101 kDa	18	2779251	3160598	2475443	2612378	2602821	2891600	0.963341	0.672971
1857	Q9GZR7	ATP-dependent RNA helicase DDX24	DDX24	96 kDa	11	5823172	5985692	6120253	5794599	6282989	5838287	0.999261	0.981733
1858	Q9NQH7	Xaa-Pro aminopeptidase 3	XPNPEP3	57 kDa	2	3602634	3680837	4754501	4547269	4452246	5005354	1.16339	0.213329
1859	Q49A26	Putative oxidoreductase GLYR1	GLYR1	61 kDa	6	6319997	7506389	7686554	7522998	7267377	6039448	0.968246	0.735027
1860	P13796	Plastin-2	LCP1	70 kDa	21	21760670	14664540	19381030	17770280	18876760	17566690	0.971464	0.824543
1861	Q02388	Collagen alpha-1(VII) chain	COL7A1	295 kDa	17	16841950	14607140	16982490	15595350	17112520	15783150	1.00123	0.983786
1862	Q9UNX4	WD repeat-containing protein 3	WDR3	106 kDa	11	9764248	9362373	12497820	10915530	11331350	11101900	1.05453	0.619497
1863	P05109	Protein S100-A8	S100A8	11 kDa	2	2001716	1286507	1654941	470933	2611300	315746	0.68741	0.563727
1864	O95361	Tripartite motif-containing protein 16	TRIM16	64 kDa	5	4508338	5196730	6551668	6482760	6924164	6218320	1.20721	0.194537
1865	Q9UNH7	Sorting nexin-6	SNX6	47 kDa	9	67001370	67305360	76897870	76744530	82935920	67266060	1.07453	0.406738
1866	Q9NX74	tRNA-dihydrouridine(20) synthase [NAD(P)+]-like	DUS2	55 kDa	7	6207433	6784684	8553046	8374619	7153929	9150179	1.14544	0.319068
1867	Q9ULV4	Coronin-1C	CORO1C	53 kDa	11	40676940	35006400	30491880	30115450	24702840	26141740	0.762513	0.0848084
1868	P13497	Bone morphogenetic protein 1	BMP1	111 kDa	18	936415	719506	455538	753059	525444	614968	0.896759	0.670656
1869	P21266	Glutathione S-transferase Mu 3	GSTM3	27 kDa	6	15482150	15108940	16379450	15572320	15745270	16577430	1.01968	0.563416
1870	P50613	Cyclin-dependent kinase 7	CDK7	39 kDa	4	3163820	3893457	4562316	3572042	4583238	3656556	1.01654	0.907724
1871	P57076	Cilia- and flagella-associated protein 298	CFAP298	33 kDa	3	3533169	3384766	3982343	3288283	4293439	4501725	1.10854	0.415297
1872	Q96CW6	Probable RNA polymerase II nuclear localization protein SLC7A6OS	SLC7A6OS	35 kDa	2	833890	952175	751468	994685	1185886	1379279	1.40288	0.0720531
1873	O60684	Importin subunit alpha-7	KPNA6	60 kDa	10	11946030	10738800	15415100	13441940	15969780	13742000	1.13265	0.369148
1874	Q9H6Y2	WD repeat-containing protein 55	WDR55	42 kDa	7	5384027	6003984	5791457	5804705	5831867	5641620	1.00575	0.876782
1875	Q9H2C0	Gigaxonin	GAN	68 kDa	10	22504140	17342580	22001290	17446360	22694140	29587380	1.12741	0.549605
1876	Q96PD5	N-acetylmuramoyl-L-alanine amidase	PGLYRP2	62 kDa	3	2098173	1823526	1445004	1375512	1455463	1636413	0.832427	0.250368
1877	Q8NBZ7	UDP-glucuronic acid decarboxylase 1	UXS1	48 kDa	4	5307089	4015929	3005276	3603670	3906534	3085832	0.859489	0.484888
1878	Q13136	Liprin-alpha-1	PPFIA1	136 kDa	16	12508210	9892792	9153525	12122440	10390570	9003127	0.998783	0.99295
1879	Q96Q11	CCA tRNA nucleotidyltransferase 1, mitochondrial	TRNT1	50 kDa	6	6253189	6946909	9701126	8449412	9321233	9105301	1.17356	0.334654
1880	Q9HCE5	N6-adenosine-methyltransferase non-catalytic subunit	METTL14	52 kDa	7	7597480	8660699	9197762	6247034	10020160	8250442	0.96314	0.810854
1881	P10646	Tissue factor pathway inhibitor	TFPI	35 kDa	7	31032070	28531500	28279570	31897980	34659790	28600880	1.08328	0.303102
1882	P17812	CTP synthase 1	CTPS1	67 kDa	20	5709280	7960711	5331695	6564089	8689273	6526332	1.1462	0.443625
1883	Q86UK7	E3 ubiquitin-protein ligase ZNF598	ZNF598	99 kDa	13	9315166	11742850	12065260	13001130	12068470	12996940	1.14924	0.189734
1884	P11310	Medium-chain specific acyl-CoA dehydrogenase, mitochondrial	ACADM	47 kDa	7	23649620	25516930	36387380	30442810	35610930	32346670	1.15016	0.398905
1885	O75063	Glycosaminoglycan xylosylkinase	FAM20B	46 kDa	5	2156191	3135793	1100115	8543866	3297318	2966017	2.31648	0.256813
1886	Q92783	Signal transducing adapter molecule 1	STAM	59 kDa	7	28462760	32222600	32460300	30629630	31450030	30343000	0.992238	0.871793
1887	Q9H6R4	Nucleolar protein 6	NOL6	128 kDa	4	1358501	1511868	2366676	2521868	2098928	2648950	1.38814	0.15105
1888	Q7L5Y1	Mitochondrial enolase superfamily member 1	ENOSF1	50 kDa	11	4181032	6400211	6730034	5432875	6337209	6303344	1.04403	0.788595
1889	Q9BV44	THUMP domain-containing protein 3	THUMPD3	57 kDa	6	3278524	3096193	3359257	4330462	3746581	4332031	1.27482	0.0311019
1890	Q10589	Bone marrow stromal antigen 2	BST2	20 kDa	2	2301707	1552902	1155010	1325526	1346152	1312627	0.795331	0.416275
1891	O15427	Monocarboxylate transporter 4	SLC16A3	49 kDa	1	1188230	1095928	2222478	1793893	2485307	2023613	1.39856	0.240069
1892	Q9Y5X3	Sorting nexin-5	SNX5	47 kDa	13	13636600	13701970	17695620	14109380	15845900	14041090	0.976955	0.829986
1893	Q14966	Zinc finger protein 638	ZNF638	221 kDa	9	5498375	5532797	4842824	5673947	4023365	6070662	0.993321	0.961611
1894	Q96BW5	Phosphotriesterase-related protein	PTER	39 kDa	7	16592090	21683660	21653060	19098560	19547700	19698370	0.973566	0.785094
1895	Q03167	Transforming growth factor beta receptor type 3	TGFBR3	94 kDa	4	90769530	86003750	59931170	60361070	54534450	53997150	0.713517	0.13694
1896	Q9BT25	HAUS augmin-like complex subunit 8	HAUS8	45 kDa	2	570576	794212	1252042	741545	1052588	1009942	1.07155	0.798321
1897	P42126	Enoyl-CoA delta isomerase 1, mitochondrial	ECI1	33 kDa	4	2951188	3024704	3960145	4035691	3613841	3562102	1.12838	0.325096
1898	Q9NUL3	Double-stranded RNA-binding protein Staufen homolog 2	STAU2	63 kDa	5	393038	746406	619972	652106	556261	567905	1.00958	0.962511
1899	Q10471	Polypeptide N-acetylgalactosaminyltransferase 2	GALNT2	65 kDa	18	5483087	4572622	8994591	7778474	5859209	7346545	1.10152	0.693113
1900	P51946	Cyclin-H	CCNH	38 kDa	6	3290533	4204312	4931937	5806069	5454877	5305370	1.33311	0.0897228
1901	Q32P28	Prolyl 3-hydroxylase 1	P3H1	83 kDa	9	4906056	5242319	6070508	5436294	5060735	5350020	0.977074	0.760862
1902	Q01955	Collagen alpha-3(IV) chain	COL4A3	162 kDa	1	2754574	2458376	2458770	1624314	1811541	2007776	0.709571	0.00770541
1903	Q9UNM6	26S proteasome non-ATPase regulatory subunit 13	PSMD13	43 kDa	16	18136300	20687190	21025310	17781530	24010100	20234910	1.03639	0.744448
1904	Q9H900	Protein zwilch homolog	ZWILCH	67 kDa	12	13000140	12981550	16202070	13261710	15605560	13952910	1.01509	0.877319
1905	Q9P260	RAB11-binding protein RELCH	RELCH	135 kDa	8	3672424	4049140	4089341	4047264	4159138	3818967	1.01816	0.690989
1906	Q9UHB7	AF4/FMR2 family member 4	AFF4	127 kDa	11	5584073	6540664	4559953	5930949	6745562	6823636	1.16874	0.240166
1907	Q9NQT4	Exosome complex component RRP46	EXOSC5	25 kDa	3	9236664	8682521	15855120	12306460	13571520	12055520	1.12315	0.611138
1908	Q8NBJ4	Golgi membrane protein 1	GOLM1	45 kDa	8	13369580	11839380	9160151	9793011	8690361	9686470	0.819627	0.230188
1909	Q9NQZ2	Something about silencing protein 10	UTP3	55 kDa	3	1074991	1015441	591269	1327576	995746	928130	1.21246	0.389679
1910	Q99638	Cell cycle checkpoint control protein RAD9A	RAD9A	43 kDa	2	230524	97774.3	193666	297331	260763	221436	1.49345	0.150301
1911	Q70IA6	MOB kinase activator 2	MOB2	27 kDa	3	4492748	4222664	4387014	4583268	4438935	4470365	1.02978	0.24036
1912	Q5TFE4	5'-nucleotidase domain-containing protein 1	NT5DC1	52 kDa	5	1423763	2506685	5017872	4565288	2433161	5812843	1.4317	0.425389
1913	Q24JP5	Transmembrane protein 132A	TMEM132A	110 kDa	5	2638190	1419902	1598894	1944391	1754919	2597129	1.11304	0.668788
1914	P24043	Laminin subunit alpha-2	LAMA2	344 kDa	31	43653820	35227410	33529120	32180600	30138110	31120410	0.831232	0.177037
1915	Q9Y2U8	Inner nuclear membrane protein Man1	LEMD3	100 kDa	3	2136425	2717024	2803059	3539657	2579229	2771955	1.16121	0.323482
1916	P35611	Alpha-adducin	ADD1	81 kDa	5	446931	692313	445226	518571	548371	599834	1.05195	0.774677
1917	Q5T6V5	Queuosine salvage protein	C9orf64	39 kDa	5	7983925	9619741	10200420	10775280	9960311	11206580	1.14883	0.162892
1918	Q9UKU9	Angiopoietin-related protein 2	ANGPTL2	57 kDa	14	6176140	5186504	4561500	5620907	4518249	5187957	0.962508	0.746395
1919	O95352	Ubiquitin-like modifier-activating enzyme ATG7	ATG7	78 kDa	13	2587787	2720364	3770950	3219512	3886452	3291863	1.14525	0.378274
1920	Q9H633	Ribonuclease P protein subunit p21	RPP21	18 kDa	3	2766713	2743274	4848500	4110336	3501563	4013491	1.12231	0.611542
1921	Q9UBQ6	Exostosin-like 2	EXTL2	37 kDa	4	19124730	16878470	12907470	15861180	12089890	17608090	0.931477	0.671134
1922	O14880	Microsomal glutathione S-transferase 3	MGST3	17 kDa	2	222730	106801	1353907	2166324	404746	1874432	2.64073	0.250318
1923	Q9NUP1	Biogenesis of lysosome-related organelles complex 1 subunit 4	BLOC1S4	23 kDa	3	7231829	8665493	9612382	8420813	8414075	8898699	1.00878	0.925083
1924	Q5R3I4	Tetratricopeptide repeat protein 38	TTC38	53 kDa	5	3131685	3096356	4438925	3859230	4086159	3983782	1.11833	0.441969
1925	P68871	Hemoglobin subunit beta	HBB	16 kDa	8	23587120	16593620	12744400	13637500	11680190	12964900	0.723335	0.261959
1926	P05089	Arginase-1	ARG1	35 kDa	6	399685	285862	1016245	78359.3	55220.1	55057.3	0.110846	0.1561
1927	Q96SY0	Integrator complex subunit 14	INTS14	57 kDa	7	10330920	11140790	13733380	12605860	14754740	16022230	1.23229	0.129526
1928	Q8NFQ8	Torsin-1A-interacting protein 2	TOR1AIP2	51 kDa	3	598264	1125584	1610167	1304447	1276502	695419	0.982709	0.959562
1929	Q9UGU5	HMG domain-containing protein 4	HMGXB4	66 kDa	3	1116234	985785	871839	1171686	1168808	1243503	1.20517	0.0895377
1930	Q92614	Unconventional myosin-XVIIIa	MYO18A	233 kDa	18	23557310	20687960	20001810	26305370	19016810	25153280	1.09694	0.471197
1931	Q9NX46	ADP-ribose glycohydrolase ARH3	ADPRS	39 kDa	7	7035049	7679570	9843332	11811430	11225650	8361058	1.27853	0.173219
1932	Q9UGC7	Peptide chain release factor 1-like, mitochondrial	MTRF1L	44 kDa	1	863291	846527	636123	634133	604472	815320	0.875523	0.379155
1933	O00534	von Willebrand factor A domain-containing protein 5A	VWA5A	86 kDa	12	13058750	14336740	17460300	14731930	16146980	14928490	1.02121	0.836018
1934	P0C0L4	Complement C4-A	C4A	193 kDa	12	2743012000	960818200	263119900	5117005000	1341628000	2008248000	2.13436	0.347674
1935	O43760	Synaptogyrin-2	SYNGR2	25 kDa	3	26414770	37873320	56526750	35658150	40483710	37714430	0.942403	0.817431
1936	Q16891	MICOS complex subunit MIC60	IMMT	84 kDa	5	1409209	693897	2089035	2805316	942955	1865261	1.33906	0.522405
1937	Q12797	Aspartyl/asparaginyl beta-hydroxylase	ASPH	86 kDa	12	8895925	9402890	15201740	12849560	11039640	14638350	1.15006	0.514801
1938	P55735	Protein SEC13 homolog	SEC13	36 kDa	7	16169210	22365540	25017120	19739500	21597930	20460800	0.972406	0.845976
1939	P43121	Cell surface glycoprotein MUC18	MCAM	72 kDa	12	19440560	19305380	19135630	18719270	14882390	20234090	0.930102	0.486397
1940	Q9NY93	Probable ATP-dependent RNA helicase DDX56	DDX56	62 kDa	5	908409	970538	1178572	1050115	1003327	1179770	1.05746	0.584657
1941	Q96MM7	Heparan-sulfate 6-O-sulfotransferase 2	HS6ST2	69 kDa	4	3988636	3636058	2263881	2596245	2436909	2645355	0.776503	0.295726
1942	Q9BXW7	Haloacid dehalogenase-like hydrolase domain-containing 5	HDHD5	46 kDa	7	5099159	6174492	9280762	6310117	7439870	7633091	1.04032	0.850509
1943	Q9HCE1	Helicase MOV-10	MOV10	114 kDa	14	4820744	7329400	8350269	8626136	11830560	8845250	1.42933	0.117116
1944	Q13630	GDP-L-fucose synthase	TSTA3	36 kDa	7	5150860	4645697	6084588	5151561	5657965	4804084	0.983154	0.866121
1945	P22695	Cytochrome b-c1 complex subunit 2, mitochondrial	UQCRC2	48 kDa	4	517023	254661	2378161	2777268	642338	3343772	2.14721	0.321665
1946	P12110	Collagen alpha-2(VI) chain	COL6A2	109 kDa	7	3999410	3514829	1263869	4643850	3828880	3141955	1.32314	0.392273
1947	P52272	Heterogeneous nuclear ribonucleoprotein M	HNRNPM	78 kDa	20	7245929	8070065	8153911	8176135	6767825	8207192	0.986419	0.859613
1948	Q7Z7H5	Transmembrane emp24 domain-containing protein 4	TMED4	26 kDa	4	1276373	1504480	2037557	971326	1571722	969738	0.729034	0.223575
1949	Q6DKJ4	Nucleoredoxin	NXN	48 kDa	7	183194	284794	607263	202185	285283	328779	0.759123	0.574635
1950	Q8NFJ5	Retinoic acid-induced protein 3	GPRC5A	40 kDa	1	2765098	2650157	5116230	4357036	3079178	4366988	1.12075	0.672685
1951	Q9UKF6	Cleavage and polyadenylation specificity factor subunit 3	CPSF3	77 kDa	14	16692080	20296550	21256150	18206190	21341250	20648750	1.0335	0.721324
1952	P43155	Carnitine O-acetyltransferase	CRAT	71 kDa	5	3038127	2646258	3661570	3710816	3250499	3384524	1.10699	0.385841
1953	O14974	Protein phosphatase 1 regulatory subunit 12A	PPP1R12A	115 kDa	20	10721060	14414250	14765480	14706430	14171920	15903540	1.12233	0.337798
1954	P08579	U2 small nuclear ribonucleoprotein B''	SNRPB2	25 kDa	4	147281	64607.5	175303	199869	249494	199203	1.67505	0.102468
1955	Q9BX40	Protein LSM14 homolog B	LSM14B	42 kDa	4	7180220	8445451	8287357	8190053	8386065	7786737	1.01881	0.755121
1956	P51116	Fragile X mental retardation syndrome-related protein 2	FXR2	74 kDa	7	1636467	1819842	2381814	1451999	1397177	1850691	0.80503	0.23873
1957	P49591	Serine--tRNA ligase, cytoplasmic	SARS1	59 kDa	12	4867558	3326729	11553690	8030723	9842878	4320849	1.12388	0.801557
1958	Q9NQE9	Histidine triad nucleotide-binding protein 3	HINT3	20 kDa	3	2985107	3274808	3990063	2037738	3349240	2400262	0.759732	0.175468
1959	P50897	Palmitoyl-protein thioesterase 1	PPT1	34 kDa	6	2690919	2000299	2413832	1611338	2519278	1333955	0.769111	0.271022
1960	Q9BW83	Intraflagellar transport protein 27 homolog	IFT27	20 kDa	4	3726548	3315535	4266850	4986928	4575123	3123965	1.12177	0.519752
1961	Q96HR9	Receptor expression-enhancing protein 6	REEP6	23 kDa	1	939578	737228	476866	502610	885538	423176	0.84104	0.591276
1962	Q9Y3B3	Transmembrane emp24 domain-containing protein 7	TMED7	25 kDa	4	1440482	2075323	3537536	2631222	1742355	3478884	1.1133	0.756004
1963	Q9NP81	Serine--tRNA ligase, mitochondrial	SARS2	58 kDa	4	955368	1327716	1701753	1610139	1729474	1269034	1.15655	0.469356
1964	Q01628	Interferon-induced transmembrane protein 3	IFITM3	15 kDa	1	104303	262496	575890	443695	483745	181769	1.17664	0.759518
1965	Q9UH62	Armadillo repeat-containing X-linked protein 3	ARMCX3	43 kDa	3	2644536	3115905	2763623	3030328	3273916	2725483	1.05932	0.472775
1966	Q99959	Plakophilin-2	PKP2	97 kDa	3	1367890	1612296	1642250	1486014	1290769	1551937	0.936459	0.450398
1967	Q99816	Tumor susceptibility gene 101 protein	TSG101	44 kDa	7	14823180	14367290	13670030	12280340	12960050	13657050	0.907536	0.0656861
1968	P19367	Hexokinase-1	HK1	102 kDa	18	2491200	1732890	2469162	3113706	3077444	3104652	1.38883	0.0732444
1969	Q9NYB0	Telomeric repeat-binding factor 2-interacting protein 1	TERF2IP	44 kDa	8	13224010	13360540	11143380	13219510	12580550	13336750	1.03734	0.587377
1970	Q10713	Mitochondrial-processing peptidase subunit alpha	PMPCA	58 kDa	7	6871181	8159276	10067010	10533690	12244440	12080930	1.38895	0.0514511
1971	P14649	Myosin light chain 6B	MYL6B	23 kDa	8	8445164	8916058	9341919	8185638	7893155	9591349	0.961315	0.598322
1972	Q8NFC6	Biorientation of chromosomes in cell division protein 1-like 1	BOD1L1	330 kDa	11	3183993	3410790	4100910	3332787	2661945	3361843	0.874798	0.28283
1973	Q9Y6N5	Sulfide:quinone oxidoreductase, mitochondrial	SQOR	50 kDa	5	3183455	3984237	4110002	3801564	4007815	4624399	1.10251	0.370555
1974	Q99611	Selenide, water dikinase 2	SEPHS2	47 kDa	2	1923812	1799448	2054950	1865036	2079945	1880352	1.00816	0.884154
1975	Q8N5S9	Calcium/calmodulin-dependent protein kinase kinase 1	CAMKK1	56 kDa	3	834097	724317	347130	357390	725070	635976	0.901809	0.753475
1976	Q92995	Ubiquitin carboxyl-terminal hydrolase 13	USP13	97 kDa	10	5255736	5969023	7080506	6465281	6998939	6055597	1.06635	0.546499
1977	P02749	Beta-2-glycoprotein 1	APOH	38 kDa	5	22354980	26028270	11843530	21739080	13194480	6967457	0.695721	0.368568
1978	Q8IWA0	WD repeat-containing protein 75	WDR75	95 kDa	13	8505996	9029272	8816356	11932300	13871720	10513190	1.37818	0.0728561
1979	Q9P242	Neuronal tyrosine-phosphorylated phosphoinositide-3-kinase adapter 2	NYAP2	71 kDa	2	154623	166337	458180	62044.1	83797.2	206495	0.452212	0.28911
1980	O15498	Synaptobrevin homolog YKT6	YKT6	22 kDa	6	1399641	2193436	1339969	1544732	1482041	1258855	0.868759	0.520948
1981	Q13158	FAS-associated death domain protein	FADD	23 kDa	1	33815	131667	44540	184522	179332	166627	2.52584	0.0708625
1982	Q5VWZ2	Lysophospholipase-like protein 1	LYPLAL1	26 kDa	5	2587949	4039020	4286548	3447314	4304069	3416746	1.02333	0.896937
1983	Q7Z3T8	Zinc finger FYVE domain-containing protein 16	ZFYVE16	169 kDa	9	3000785	3447814	3471612	3429563	3395434	3664598	1.0574	0.354683
1984	P39656	Dolichyl-diphosphooligosaccharide--protein glycosyltransferase 48 kDa subunit	DDOST	51 kDa	5	6813290	6621978	21808940	23753190	9094391	24457710	1.62595	0.358735
1985	Q5T6F2	Ubiquitin-associated protein 2	UBAP2	117 kDa	4	915776	784735	795001	714460	759032	485043	0.784823	0.157549
1986	Q6P6C2	RNA demethylase ALKBH5	ALKBH5	44 kDa	3	2066719	2295849	2088646	1847335	1817775	2382013	0.937362	0.550346
1987	Q9BU76	Multiple myeloma tumor-associated protein 2	MMTAG2	29 kDa	4	2435877	4538749	3300763	2712291	3366982	2021486	0.788365	0.382328
1988	Q13421	Mesothelin	MSLN	69 kDa	6	6579602	7345779	5771062	4886836	6100315	5357950	0.82985	0.128652
1989	Q9NVA1	Ubiquinol-cytochrome-c reductase complex assembly factor 1	UQCC1	35 kDa	4	10210770	6404591	5240610	9904867	6169512	7555646	1.08117	0.767279
1990	Q6ZSR9	Uncharacterized protein FLJ45252	-	38 kDa	2	232903	269293	280692	129581	295395	194057	0.790704	0.376624
1991	Q96AT1	Uncharacterized protein KIAA1143	KIAA1143	17 kDa	4	2832372	3655645	2609649	2510599	2737046	2615262	0.864277	0.324083
1992	P23141	Liver carboxylesterase 1	CES1	63 kDa	5	1184723	1638186	2441677	1923123	1191965	2727973	1.10988	0.755189
1993	Q5T1M5	FK506-binding protein 15	FKBP15	134 kDa	9	3118595	4050207	4364170	3328797	3455014	2946626	0.843706	0.245139
1994	P13284	Gamma-interferon-inducible lysosomal thiol reductase	IFI30	28 kDa	2	892077	1137407	667956	661731	880492	1018770	0.949416	0.804047
1995	Q92934	Bcl2-associated agonist of cell death	BAD	18 kDa	1	267497	617923	345045	681332	388005	419002	1.20957	0.576207
1996	P68371	Tubulin beta-4B chain	TUBB4B	50 kDa	20	239017300	232269200	197002500	211280600	228342300	245062300	1.02453	0.755118
1997	O00170	AH receptor-interacting protein	AIP	38 kDa	10	14152930	15875800	16794470	15026920	15317040	12791140	0.921233	0.330949
1998	Q9UK22	F-box only protein 2	FBXO2	33 kDa	6	4749915	4570017	5449788	5235847	5877475	4688705	1.06989	0.476465
[truncated: 1,538 more rows]

## Sheet: Up-regulated proteins
Supplementary Table 4. List of up-regulated human proteins observed in TNF stimulated and non-stimulated HeLa cells by albumin depletion. The results of simultaneously analyzing collected MS data for each treatment by the Scaffold DIA were used.
No	Uniprot Ac.	Protein name	Gene symbol	Molecular Weight	Identified # of Peptides	TNF non-stimulated Sup. 1 Intensity	TNF non-stimulated Sup. 2 Intensity	TNF non-stimulated Sup. 3 Intensity	TNF stimulated Sup. 1 Intensity	TNF stimulated Sup. 2 Intensity	TNF stimulated Sup. 3 Intensity	Fold change by intensity Ave. (stimulated/non-stimulated)	P-value
1	Q96HY6	DDRGK domain-containing protein 1	DDRGK1	36 kDa	5	2854585	3331635	2706763	5362929	5522128	4529430	1.73333	0.00685112
2	Q14CX7	N-alpha-acetyltransferase 25, NatB auxiliary subunit	NAA25	112 kDa	16	18590470	21809540	27247820	34091430	35280130	38002700	1.58725	0.0204193
3	P05231	Interleukin-6	IL6	24 kDa	4	12766290	13289710	11315130	26059130	29340040	25215030	2.15713	0.00241745
4	Q6ZMK1	Cysteine and histidine-rich protein 1	CYHR1	41 kDa	4	1512094	1966038	2425692	4380521	3592770	3711085	1.97912	0.00597279
5	P09603	Macrophage colony-stimulating factor 1	CSF1	60 kDa	4	7799298	6192212	5515686	10494770	14701860	10796080	1.8451	0.0372562
6	Q9UBT7	Alpha-catulin	CTNNAL1	82 kDa	1	30495.9	61372.3	6345.24	100969	138214	110160	3.55697	0.0159537
7	Q5VIR6	Vacuolar protein sorting-associated protein 53 homolog	VPS53	80 kDa	4	396916	256959	456146	572253	653283	775239	1.80246	0.0236469
8	P10145	Interleukin-8	CXCL8	11 kDa	1	7411538	5775487	7277910	22456310	24153590	24793980	3.48908	7.11439e-05
9	Q6PJ69	Tripartite motif-containing protein 65	TRIM65	57 kDa	1	47473.7	57393.8	30725.7	96263.2	93411.8	69719	1.91303	0.0229758
10	P26038	Moesin	MSN	68 kDa	24	2583291	2445435	2877933	4367098	3679835	4141762	1.54157	0.00668954
11	P04439	HLA class I histocompatibility antigen, A alpha chain	HLA-A	41 kDa	3	191297	348827	208918	433952	493878	449543	1.83885	0.0397391
12	P19875	C-X-C motif chemokine 2	CXCL2	11 kDa	3	3020625	3047160	2116516	5004930	5542908	6466793	2.07894	0.00663583
13	Q8WXD2	Secretogranin-3	SCG3	53 kDa	5	178272	475285	129781	1434160	1000448	704408	4.00723	0.0462803
14	Q15021	Condensin complex subunit 1	NCAPD2	157 kDa	3	227114	249093	302433	424940	390589	415566	1.58108	0.010578
15	Q9Y251	Heparanase	HPSE	61 kDa	2	741639	579212	1048317	1675404	1356306	1164113	1.77101	0.0402088
16	Q8N0U4	Protein FAM185A	FAM185A	42 kDa	1	248784	194821	280212	592652	588399	721095	2.62794	0.00349675
17	Q9BQ04	RNA-binding protein 4B	RBM4B	40 kDa	2	109582	136440	218905	299220	387132	244561	2.00227	0.0455

## Sheet: Down-regulated proteins
Supplementary Table 4. List of down-regulated human proteins observed in TNF stimulated and non-stimulated HeLa cells by albumin depletion. The results of simultaneously analyzing collected MS data for each treatment by the Scaffold DIA were used.
No	Uniprot Ac.	Protein name	Gene symbol	Molecular Weight	Identified # of Peptides	TNF non-stimulated Sup. 1 Intensity	TNF non-stimulated Sup. 2 Intensity	TNF non-stimulated Sup. 3 Intensity	TNF stimulated Sup. 1 Intensity	TNF stimulated Sup. 2 Intensity	TNF stimulated Sup. 3 Intensity	Fold change by intensity Ave. (stimulated/non-stimulated)	P-value
1	P35555	Fibrillin-1	FBN1	312 kDa	40	3100524	3692284	3232025	2015938	2053194	1357092	0.541278	0.00694973
2	P04264	Keratin, type II cytoskeletal 1	KRT1	66 kDa	22	2778470000	1580923000	2298419000	535982700	1268865000	596639500	0.360702	0.0339886
3	Q9P2W9	Syntaxin-18	STX18	39 kDa	7	4476460	4512156	4640731	3353328	2980368	2442950	0.643952	0.0224871
4	Q5T1V6	Probable ATP-dependent RNA helicase DDX59	DDX59	69 kDa	12	314745900	287843200	188692200	9660607	76055430	9769567	0.120672	0.0114928
5	P81605	Dermcidin	DCD	11 kDa	1	8291835	8391628	5732577	2319769	3694194	3599340	0.428858	0.0225949
6	P19838	Nuclear factor NF-kappa-B p105 subunit	NFKB1	105 kDa	9	3571685	3646557	2921441	1769383	2007355	2115252	0.581082	0.0138943
7	Q7L5Y9	E3 ubiquitin-protein transferase MAEA	MAEA	45 kDa	5	4029975	4302491	4110015	2875299	2682273	2530039	0.65	0.000440582
8	Q8N1N4	Keratin, type II cytoskeletal 78	KRT78	57 kDa	6	2596379	1971765	3003346	671754	973320	680290	0.307121	0.019785
9	O95749	Geranylgeranyl pyrophosphate synthase	GGPS1	35 kDa	3	2804128	2640416	3534763	1219197	1803424	1998807	0.559222	0.0226721
10	Q96CV9	Optineurin	OPTN	66 kDa	6	104062	132559	91632.7	29477.1	23051.7	63768.4	0.354291	0.0157142
11	Q9UHI8	A disintegrin and metalloproteinase with thrombospondin motifs 1	ADAMTS1	105 kDa	10	4277038	4699869	3817009	2423118	3362198	2398805	0.639689	0.0211633
12	Q13217	DnaJ homolog subfamily C member 3	DNAJC3	58 kDa	6	3326916	4387067	3494580	1947542	2113080	2179450	0.556724	0.0326868
13	Q96QF0	Rab-3A-interacting protein	RAB3IP	53 kDa	1	132309	172621	166272	107083	47868.4	85219	0.509696	0.0264438
14	P29508	Serpin B3	SERPINB3	45 kDa	4	1302550	1263500	1433131	565178	727683	706689	0.49999	0.000771459
15	P48723	Heat shock 70 kDa protein 13	HSPA13	52 kDa	9	1875020	2478897	1840919	707129	1405902	540825	0.428398	0.0270888
16	Q92743	Serine protease HTRA1	HTRA1	51 kDa	8	2659088	3204492	2135829	2002004	1146434	1430700	0.572435	0.0479476
17	Q06033	Inter-alpha-trypsin inhibitor heavy chain H3	ITIH3	100 kDa	8	3923832	3873357	2986411	2186338	2055386	2494112	0.624637	0.0323459
18	P12883	Myosin-7	MYH7	223 kDa	7	616531	607150	652999	453964	315516	434963	0.641795	0.0263051
19	Q13641	Trophoblast glycoprotein	TPBG	46 kDa	4	1612313	1488859	1729681	1105087	860285	1067892	0.627894	0.00447843
20	Q9H8Y8	Golgi reassembly-stacking protein 2	GORASP2	47 kDa	3	195982	201575	214087	154471	114480	86921.6	0.581829	0.041015
21	Q13591	Semaphorin-5A	SEMA5A	121 kDa	2	747183	656067	496162	439370	363755	217239	0.5372	0.0412338
22	Q9GZV1	Ankyrin repeat domain-containing protein 2	ANKRD2	40 kDa	4	1785538	1379943	1657794	1022038	890186	849463	0.572575	0.0168601
23	Q9UII2	ATPase inhibitor, mitochondrial	ATP5IF1	12 kDa	1	120677	123662	189335	67643.6	47364.8	17818.9	0.306283	0.026152
24	Q96P63	Serpin B12	SERPINB12	46 kDa	3	1402294	1255115	2060040	223568	514488	154462	0.189195	0.0217488
25	Q13111	Chromatin assembly factor 1 subunit A	CHAF1A	107 kDa	2	186856	201738	230702	161428	96841.7	83747.1	0.552267	0.0413944
26	Q8N302	Angiogenic factor with G patch and FHA domains 1	AGGF1	81 kDa	2	187029	167280	183981	66916.2	60111.1	127044	0.471996	0.0382368
27	O43924	Retinal rod rhodopsin-sensitive cGMP 3',5'-cyclic phosphodiesterase subunit delta	PDE6D	17 kDa	1	213100	161743	244167	32466.5	104777	135524	0.44065	0.0440489
