# Supplementary material for: A Simple Method for In-Depth Proteome Analysis of Mammalian Cell Culture Conditioned Media Containing Fetal Bovine Serum
Source: Int J Mol Sci. 2021 Mar 4;22(5):2565. doi: 10.3390/ijms22052565 (PMC7961985; doi:10.3390/ijms22052565)
Supplement: Supplementary file 1 [file ijms-22-02565-s001.zip › Supplementary Table S5.xlsx]

## Sheet: All identified proteins
Supplementary Table 5. List of all human proteins observed in TNF stimulated and non-stimulated HeLa cells by albumin non-depletion. The results of simultaneously analyzing collected MS data for each treatment by the Scaffold DIA were used.
No	Uniprot Ac.	Protein name	Gene symbol	Molecular Weight	Identified # of Peptides	TNF non-stimulated Sup. 1 Intensity	TNF non-stimulated Sup. 2 Intensity	TNF non-stimulated Sup. 3 Intensity	TNF stimulated Sup. 1 Intensity	TNF stimulated Sup. 2 Intensity	TNF stimulated Sup. 3 Intensity	Fold change by intensity Ave. (stimulated/non-stimulated)	P-value
1	Q86YZ3	Hornerin	HRNR	282 kDa	8	3613302	741249	536684	289367	1521465	544369	0.481515	0.493107
2	P18669	Phosphoglycerate mutase 1	PGAM1	29 kDa	9	17917970	18624940	17780000	15434320	17783710	14020220	0.869582	0.158295
3	Q06830	Peroxiredoxin-1	PRDX1	22 kDa	8	958737	1986578	534146	1186835	1474821	3377160	1.73556	0.362574
4	P29692	Elongation factor 1-delta	EEF1D	31 kDa	10	15482610	17265770	18984450	20226180	20995600	19658290	1.17682	0.0798409
5	P02787	Serotransferrin	TF	77 kDa	33	2250236000	2268086000	2316768000	2207844000	2344558000	1983015000	0.956157	0.444343
6	Q01105	Protein SET	SET	33 kDa	6	18665250	30495030	8993623	20331520	30054600	28392600	1.35466	0.395412
7	Q16576	Histone-binding protein RBBP7	RBBP7	48 kDa	8	4035385	4603709	5363023	4680542	5328956	5036440	1.07455	0.477493
8	P49773	Histidine triad nucleotide-binding protein 1	HINT1	14 kDa	4	4223239	3637196	5660817	4660758	5087337	4635074	1.06375	0.683745
9	P46940	Ras GTPase-activating-like protein IQGAP1	IQGAP1	189 kDa	28	9049071	10458940	8980420	9089529	7995812	8667053	0.90396	0.200171
10	P43487	Ran-specific GTPase-activating protein	RANBP1	23 kDa	5	1444280	1777058	2006033	2932825	2365190	2488261	1.48952	0.0229944
11	P30153	Serine/threonine-protein phosphatase 2A 65 kDa regulatory subunit A alpha isoform	PPP2R1A	65 kDa	17	2406700	2763216	2444032	2330527	2698526	2938543	1.04645	0.609285
12	P02774	Vitamin D-binding protein	GC	53 kDa	5	60907370	34787320	160211500	208724000	343236200	228790000	3.05092	0.0371508
13	P21333	Filamin-A	FLNA	281 kDa	64	11099950	12879260	15257960	15654910	15056530	13231590	1.11993	0.339864
14	Q16719	Kynureninase	KYNU	52 kDa	9	34624190	30628750	37518290	29594720	37409250	33832160	0.981171	0.841204
15	P31947	14-3-3 protein sigma	SFN	28 kDa	7	10926010	11825140	14625960	13941100	14586940	16326890	1.20006	0.144995
16	P04406	Glyceraldehyde-3-phosphate dehydrogenase	GAPDH	36 kDa	11	332314400	174091700	218919900	230362900	247963800	201326000	0.937031	0.781682
17	O75083	WD repeat-containing protein 1	WDR1	66 kDa	10	3529009	4146899	3286374	2753144	5069277	2547060	0.945924	0.834207
18	P29966	Myristoylated alanine-rich C-kinase substrate	MARCKS	32 kDa	3	694139	873565	881378	809743	795924	910437	1.02737	0.772217
19	P27695	DNA-(apurinic or apyrimidinic site) lyase	APEX1	36 kDa	10	7757459	10866100	13493040	12972160	14711920	12901070	1.26368	0.224695
20	P08697	Alpha-2-antiplasmin	SERPINF2	55 kDa	5	21838290	21310150	19942210	16572410	17265160	14318710	0.763287	0.0135978
21	P12814	Alpha-actinin-1	ACTN1	103 kDa	27	16486260	18856770	23955360	18500250	22294390	18741060	1.004	0.976871
22	P58546	Myotrophin	MTPN	13 kDa	3	3906629	733453	8387925	2612728	684178	1266007	0.350239	0.330914
23	P63244	Receptor of activated protein C kinase 1	RACK1	35 kDa	10	19608950	21521920	21392770	25362880	22692940	20988820	1.1043	0.225326
24	P30041	Peroxiredoxin-6	PRDX6	25 kDa	11	124134900	86209660	112293100	78255970	90935320	79277750	0.770118	0.146896
25	P05231	Interleukin-6	IL6	24 kDa	3	2966835	2836901	3107459	6063474	6517910	6694901	2.16315	0.000852432
26	Q9UMS4	Pre-mRNA-processing factor 19	PRPF19	55 kDa	7	1852421	2540974	3249015	2854263	3482657	3466824	1.28281	0.210545
27	O95456	Proteasome assembly chaperone 1	PSMG1	33 kDa	3	1366143	1095283	2184026	1565106	1917127	1985009	1.1769	0.500858
28	P40926	Malate dehydrogenase, mitochondrial	MDH2	36 kDa	12	41710640	44605340	60451740	53471310	64217720	58550540	1.20081	0.231907
29	P35527	Keratin, type I cytoskeletal 9	KRT9	62 kDa	18	1211585000	357047300	449687900	434047200	697539500	445000200	0.781138	0.648132
30	Q09028	Histone-binding protein RBBP4	RBBP4	48 kDa	7	1907113	2598530	2943868	2739174	3075110	2469327	1.11197	0.483606
31	P50990	T-complex protein 1 subunit theta	CCT8	60 kDa	19	17266110	12470380	14128190	14086600	13264730	14414340	0.952148	0.67202
32	Q08211	ATP-dependent RNA helicase A	DHX9	141 kDa	15	21129310	18276030	25408760	19603030	23382110	19577990	0.96527	0.775733
33	P52209	6-phosphogluconate dehydrogenase, decarboxylating	PGD	53 kDa	11	3163003	3941735	3362692	2681313	3261159	3636090	0.915082	0.461288
34	P53396	ATP-citrate synthase	ACLY	121 kDa	15	1248080	1520455	1919889	2373202	2587333	2282626	1.5449	0.0321683
35	P35555	Fibrillin-1	FBN1	312 kDa	14	102036	198393	75156.6	62530.4	276327	145192	1.28879	0.650095
36	Q16881	Thioredoxin reductase 1, cytoplasmic	TXNRD1	71 kDa	8	15625510	24344410	23713400	25371380	30828350	22126370	1.22993	0.267358
37	P21291	Cysteine and glycine-rich protein 1	CSRP1	21 kDa	8	2470257	3620808	4452383	5672900	5755875	5296855	1.58635	0.0623099
38	P43490	Nicotinamide phosphoribosyltransferase	NAMPT	56 kDa	9	2759611	2502363	2541845	4053939	3474212	3774596	1.44836	0.00927868
39	Q8NC51	Plasminogen activator inhibitor 1 RNA-binding protein	SERBP1	45 kDa	6	7208404	8693615	10346060	9250538	11489300	9189293	1.14024	0.359069
40	O95372	Acyl-protein thioesterase 2	LYPLA2	25 kDa	2	389276	205703	595012	253999	502083	487744	1.04524	0.903601
41	P23381	Tryptophan--tRNA ligase, cytoplasmic	WARS1	53 kDa	6	5894789	5965465	7981409	6553222	9017977	5678179	1.07095	0.720678
42	Q13813	Spectrin alpha chain, non-erythrocytic 1	SPTAN1	285 kDa	44	14809970	17777760	17727680	17915390	29155260	18014110	1.29354	0.316563
43	P07996	Thrombospondin-1	THBS1	129 kDa	30	7932503	7127234	5459652	5166158	3620796	4456951	0.645434	0.0583756
44	P16152	Carbonyl reductase [NADPH] 1	CBR1	30 kDa	7	7705973	8312654	11081590	10662620	12206340	9880808	1.20847	0.215295
45	P48059	LIM and senescent cell antigen-like-containing domain protein 1	LIMS1	37 kDa	8	7498629	6075256	5661495	6440575	4147965	5142621	0.817824	0.250757
46	P07900	Heat shock protein HSP 90-alpha	HSP90AA1	85 kDa	25	100434200	114592600	125664500	130120400	143666100	129148900	1.1827	0.0862551
47	P48643	T-complex protein 1 subunit epsilon	CCT5	60 kDa	16	24525210	13219540	21971220	16102200	17153590	13911120	0.789854	0.346208
48	Q14624	Inter-alpha-trypsin inhibitor heavy chain H4	ITIH4	103 kDa	6	24918780	27802860	24516700	24559430	24398090	26484440	0.976742	0.656598
49	P11413	Glucose-6-phosphate 1-dehydrogenase	G6PD	59 kDa	14	22260760	19462020	19375410	20216790	26357900	27027690	1.20466	0.184982
50	P06748	Nucleophosmin	NPM1	33 kDa	3	15133510	15820950	10127330	19454580	19799410	14611100	1.31117	0.157914
51	P17931	Galectin-3	LGALS3	26 kDa	5	9426593	11012010	18916250	15687860	13028910	13446750	1.07137	0.784253
52	Q12906	Interleukin enhancer-binding factor 3	ILF3	95 kDa	14	17067990	12989380	20783010	16288520	16365410	14486470	0.927224	0.643749
53	P35237	Serpin B6	SERPINB6	43 kDa	12	14326440	17264060	26233640	22359840	19879250	23265180	1.13282	0.553937
54	P52292	Importin subunit alpha-1	KPNA2	58 kDa	6	3399399	2450386	2621864	2669678	2836321	2637240	0.961234	0.746355
55	P20908	Collagen alpha-1(V) chain	COL5A1	184 kDa	5	5643491	4992187	4805746	5251017	3852905	4957170	0.910609	0.416624
56	Q9UL46	Proteasome activator complex subunit 2	PSME2	27 kDa	7	5445278	4799076	5195875	4846994	5332591	5198237	0.995958	0.934648
57	P54819	Adenylate kinase 2, mitochondrial	AK2	26 kDa	7	10447430	12914870	16412410	13798760	14919200	12144670	1.02735	0.862139
58	O43390	Heterogeneous nuclear ribonucleoprotein R	HNRNPR	71 kDa	14	11343770	13465540	15113520	14471780	14689180	13659880	1.07259	0.473305
59	P04075	Fructose-bisphosphate aldolase A	ALDOA	39 kDa	9	20356430	20263810	30972780	25163560	24910790	25270600	1.05241	0.758603
60	P14923	Junction plakoglobin	JUP	82 kDa	14	7463277	5414747	4859709	7234243	6198654	8538343	1.23867	0.248559
61	P00491	Purine nucleoside phosphorylase	PNP	32 kDa	13	21177970	23268090	28930230	26477260	29311310	24921300	1.09994	0.421588
62	O00410	Importin-5	IPO5	124 kDa	17	16009070	16400340	21154130	16732020	18087020	18964700	1.00411	0.970005
63	Q8WW12	PEST proteolytic signal-containing nuclear protein	PCNP	19 kDa	3	1117285	1344186	1496341	1076131	1702091	1289061	1.02766	0.874741
64	P10809	60 kDa heat shock protein, mitochondrial	HSPD1	61 kDa	11	25822130	19974440	30027060	25442510	27250160	24718630	1.02094	0.874937
65	O14579	Coatomer subunit epsilon	COPE	34 kDa	1	588095	666280	487232	560533	749321	659420	1.13072	0.37024
66	P49327	Fatty acid synthase	FASN	273 kDa	39	23500990	27189700	35602170	32222000	30092410	33307280	1.10811	0.480023
67	P26599	Polypyrimidine tract-binding protein 1	PTBP1	57 kDa	7	7049067	6118123	7424439	8661821	8500292	7846108	1.21448	0.0415728
68	P02545	Prelamin-A/C	LMNA	74 kDa	19	43264890	61502430	73996180	54069000	63805930	66377300	1.0307	0.863433
69	P26641	Elongation factor 1-gamma	EEF1G	50 kDa	10	16684320	21845360	21190810	17362170	17928710	21069340	0.943733	0.606679
70	P13645	Keratin, type I cytoskeletal 10	KRT10	59 kDa	18	642572800	463793500	514020500	195344900	191424600	180290900	0.349954	0.0215831
71	P07108	Acyl-CoA-binding protein	DBI	10 kDa	3	9209484	9945154	16981300	13225520	11466420	13652210	1.06111	0.798122
72	P04080	Cystatin-B	CSTB	11 kDa	3	3019097	4683915	6955266	5413975	8937081	5832578	1.37694	0.311873
73	P29401	Transketolase	TKT	68 kDa	12	34949030	43614060	49380760	52635890	43151790	42046300	1.0773	0.574255
74	Q58FF8	Putative heat shock protein HSP 90-beta 2	HSP90AB2P	44 kDa	9	26109790	29070010	43282280	40807120	47304500	44262810	1.34442	0.156241
75	P12956	X-ray repair cross-complementing protein 6	XRCC6	70 kDa	15	21435580	22620300	29390590	20212820	27693540	24103840	0.980445	0.891375
76	P68036	Ubiquitin-conjugating enzyme E2 L3	UBE2L3	18 kDa	5	7423061	8418770	9513350	7299998	9191059	7913774	0.962519	0.719484
77	P31327	Carbamoyl-phosphate synthase [ammonia], mitochondrial	CPS1	165 kDa	38	221117200	218006500	313357000	263406000	293804000	257804300	1.0831	0.582821
78	P00558	Phosphoglycerate kinase 1	PGK1	45 kDa	13	60824570	63624890	98953130	72066710	72763040	57163990	0.904169	0.632614
79	P23588	Eukaryotic translation initiation factor 4B	EIF4B	69 kDa	4	1853799	2472691	2322615	2203831	1534264	2545858	0.945083	0.749147
80	Q08380	Galectin-3-binding protein	LGALS3BP	65 kDa	6	9296335	9263476	8154019	10150870	10037870	11362290	1.18107	0.0473064
81	P49588	Alanine--tRNA ligase, cytoplasmic	AARS1	107 kDa	20	17980200	16487290	19244500	18505670	19479530	15564470	0.996978	0.971692
82	P14324	Farnesyl pyrophosphate synthase	FDPS	48 kDa	4	1410134	2746411	2706003	3165102	1546355	2141281	0.998571	0.996199
83	Q02413	Desmoglein-1	DSG1	114 kDa	6	6104904	2134741	3832968	3231568	3554031	3126703	0.821057	0.595898
84	P55060	Exportin-2	CSE1L	110 kDa	21	23165690	20493760	20414550	19471360	20508590	20145090	0.938369	0.280161
85	P53999	Activated RNA polymerase II transcriptional coactivator p15	SUB1	14 kDa	4	3193169	3243807	4019670	3695354	5584962	2550326	1.1314	0.662567
86	P49915	GMP synthase [glutamine-hydrolyzing]	GMPS	77 kDa	15	8579616	9275679	9397946	8932284	9583507	10024360	1.04722	0.353792
87	P34096	Ribonuclease 4	RNASE4	17 kDa	2	3624348	2665923	2512510	3160688	2939517	2895158	1.02188	0.872533
88	Q9UQ35	Serine/arginine repetitive matrix protein 2	SRRM2	300 kDa	7	2968549	3336727	6866716	3459652	3247570	4786446	0.872584	0.706999
89	P18206	Vinculin	VCL	124 kDa	36	3223860	2604983	4679304	3324283	4096752	3846889	1.0723	0.729325
90	P61978	Heterogeneous nuclear ribonucleoprotein K	HNRNPK	51 kDa	11	45239680	38065760	43668970	37742430	43584090	37019330	0.932045	0.39351
91	P22314	Ubiquitin-like modifier-activating enzyme 1	UBA1	118 kDa	17	6382247	7156192	9291131	8424826	8907272	9084960	1.15714	0.301392
92	P47755	F-actin-capping protein subunit alpha-2	CAPZA2	33 kDa	6	3276552	3539777	3999647	2965330	4345689	3809398	1.02815	0.837339
93	P80723	Brain acid soluble protein 1	BASP1	23 kDa	9	5975291	8257384	8121540	5491202	6047769	5412085	0.758294	0.126824
94	Q16401	26S proteasome non-ATPase regulatory subunit 5	PSMD5	56 kDa	7	6567751	8053884	8456939	7283066	8628646	7328250	1.00699	0.944586
95	P02751	Fibronectin	FN1	272 kDa	25	Missing Value	50543.7	388107	666605	1947906	540737	-	-
96	P51858	Hepatoma-derived growth factor	HDGF	27 kDa	8	18815200	25373610	29593330	22365100	27007250	19982820	0.939999	0.717203
97	P08779	Keratin, type I cytoskeletal 16	KRT16	51 kDa	17	6354983	1059967	8049004	22569690	9514666	20227340	3.38282	0.0727729
98	P06576	ATP synthase subunit beta, mitochondrial	ATP5F1B	57 kDa	12	11239070	12597370	15663490	13608730	17446000	16569390	1.20568	0.197511
99	Q5VW32	BRO1 domain-containing protein BROX	BROX	46 kDa	3	1704728	957302	1069778	1719413	1873432	1218454	1.28927	0.305497
100	Q8NBS9	Thioredoxin domain-containing protein 5	TXNDC5	48 kDa	8	1065111	1455998	1955077	1140690	1304553	1629700	0.910361	0.679746
101	O43707	Alpha-actinin-4	ACTN4	105 kDa	30	2201449	2841755	3037317	2337304	2140487	2525396	0.866675	0.291311
102	Q14980	Nuclear mitotic apparatus protein 1	NUMA1	238 kDa	15	3669514	4517331	3913149	3691449	3863983	3637787	0.92506	0.353358
103	Q99832	T-complex protein 1 subunit eta	CCT7	59 kDa	12	34334400	18659000	19574660	17148300	18304120	16153340	0.711136	0.302092
104	Q15181	Inorganic pyrophosphatase	PPA1	33 kDa	7	8284163	8222606	11471830	8302174	10338160	8552304	0.971908	0.846374
105	P14618	Pyruvate kinase PKM	PKM	58 kDa	18	16640050	15409480	19140210	17621750	19297840	20077940	1.11346	0.225522
106	P08195	4F2 cell-surface antigen heavy chain	SLC3A2	68 kDa	10	10297860	12364100	17926980	14987850	15903800	15385750	1.14015	0.493328
107	P36952	Serpin B5	SERPINB5	42 kDa	11	5226835	7231678	8338057	7059585	8052584	7261180	1.07582	0.629973
108	P78371	T-complex protein 1 subunit beta	CCT2	57 kDa	14	4766758	1929949	1961075	2166345	1731560	2701523	0.762254	0.547179
109	Q15149	Plectin	PLEC	532 kDa	57	36657970	37840030	47056930	34030770	41847290	38947870	0.944642	0.608426
110	Q9Y3I0	RNA-splicing ligase RtcB homolog	RTCB	55 kDa	8	3629321	3921679	3537788	3543503	3663021	3695885	0.983192	0.657005
111	P25815	Protein S100-P	S100P	10 kDa	3	50131300	47194880	44569070	41501420	80060630	33428730	1.09229	0.790875
112	Q13151	Heterogeneous nuclear ribonucleoprotein A0	HNRNPA0	31 kDa	3	804197	783284	950683	881093	898147	992930	1.09219	0.293645
113	P05455	Lupus La protein	SSB	47 kDa	10	10040300	10565680	11315890	11467160	13580540	10590910	1.11643	0.297652
114	P16083	Ribosyldihydronicotinamide dehydrogenase [quinone]	NQO2	26 kDa	6	6563649	8900096	11600560	8369242	11081430	9708808	1.07741	0.70045
115	P34932	Heat shock 70 kDa protein 4	HSPA4	94 kDa	17	20539220	23214400	27311920	22686010	25868870	20832290	0.976383	0.831963
116	P04264	Keratin, type II cytoskeletal 1	KRT1	66 kDa	23	3071277000	1319366000	1649738000	1037988000	1966187000	1006101000	0.663911	0.351682
117	O43776	Asparagine--tRNA ligase, cytoplasmic	NARS1	63 kDa	13	3040513	3311809	4195412	3767061	4953171	4973722	1.29828	0.120107
118	Q92973	Transportin-1	TNPO1	102 kDa	15	12311310	10949370	12262180	11271430	11903440	11446300	0.974617	0.583311
119	P69905	Hemoglobin subunit alpha	HBA1	15 kDa	7	23110440	21967720	22977150	30650580	24849740	139911100	2.87136	0.374306
120	P01857	Immunoglobulin heavy constant gamma 1	IGHG1	36 kDa	6	3784601	3889722	3593046	3949550	3993258	4074247	1.06654	0.086348
121	Q5D862	Filaggrin-2	FLG2	248 kDa	4	1422261	443779	2038393	384212	393258	832087	0.412238	0.2362
122	Q07021	Complement component 1 Q subcomponent-binding protein, mitochondrial	C1QBP	31 kDa	2	5506217	7860965	6667143	8099821	7579184	6234693	1.09381	0.516406
123	Q10567	AP-1 complex subunit beta-1	AP1B1	105 kDa	12	5941873	4019687	3831100	3603623	3147912	3072903	0.712295	0.183254
124	P02768	Serum albumin	ALB	69 kDa	21	147960200	1993910000	2589180000	1780104000	1303252000	1089166000	0.881944	0.827191
125	Q9Y3F4	Serine-threonine kinase receptor-associated protein	STRAP	38 kDa	6	3461727	2520210	4050527	3504929	3106105	3589474	1.01675	0.914222
126	P04083	Annexin A1	ANXA1	39 kDa	7	8482559	9593203	22980530	11712120	11146040	9478225	0.787611	0.597606
127	P30084	Enoyl-CoA hydratase, mitochondrial	ECHS1	31 kDa	4	3317614	3647065	4705993	3873396	4045673	3690707	0.994782	0.96632
128	P09651	Heterogeneous nuclear ribonucleoprotein A1	HNRNPA1	39 kDa	9	76216510	69182440	109909800	75262860	87983310	83135400	0.965034	0.838649
129	P01834	Immunoglobulin kappa constant	IGKC	12 kDa	3	863754	875796	781412	976945	433193	738924	0.852477	0.51516
130	P00338	L-lactate dehydrogenase A chain	LDHA	37 kDa	15	104178800	92840750	125317600	111890200	111154500	86059760	0.958948	0.747084
131	O95861	3'(2'),5'-bisphosphate nucleotidase 1	BPNT1	33 kDa	5	1097107	1227900	1560371	1500337	1901424	1515711	1.26564	0.145155
132	P04792	Heat shock protein beta-1	HSPB1	23 kDa	3	3089090	3900881	3554487	3588564	4209970	4756955	1.19072	0.186988
133	P36776	Lon protease homolog, mitochondrial	LONP1	106 kDa	6	1521652	1561260	1764198	1830527	2214248	2237487	1.29608	0.0474559
134	Q15046	Lysine--tRNA ligase	KARS1	68 kDa	8	6598260	8411674	10754980	8541465	9074243	8589589	1.01709	0.914512
135	P50991	T-complex protein 1 subunit delta	CCT4	58 kDa	13	29355990	16081830	21881760	18670720	21299770	17798810	0.858135	0.498436
136	P22392	Nucleoside diphosphate kinase B	NME2	17 kDa	7	34196770	35532190	52334680	47235730	46639630	46937580	1.1536	0.396323
137	P06733	Alpha-enolase	ENO1	47 kDa	11	125121800	124873900	180500500	215719300	219476400	185308700	1.44137	0.0546346
138	Q7Z7G0	Target of Nesh-SH3	ABI3BP	119 kDa	5	7492720	7835269	7357959	8124689	7751235	7103055	1.01292	0.78774
139	Q6UX71	Plexin domain-containing protein 2	PLXDC2	60 kDa	6	210707	95697.2	148461	68089.7	217858	229889	1.13404	0.761322
140	P06744	Glucose-6-phosphate isomerase	GPI	63 kDa	10	20239130	25301890	25834210	26577830	34830620	21967190	1.16813	0.41081
141	P41091	Eukaryotic translation initiation factor 2 subunit 3	EIF2S3	51 kDa	6	5422077	7024784	7933226	5616767	6841971	6320282	0.92144	0.561164
142	Q99497	Parkinson disease protein 7	PARK7	20 kDa	5	624908	609721	1128228	841530	720210	972323	1.07246	0.780209
143	Q04695	Keratin, type I cytoskeletal 17	KRT17	48 kDa	13	4342069	11423970	3482741	4713631	6823846	4572321	0.836926	0.723217
144	Q07954	Prolow-density lipoprotein receptor-related protein 1	LRP1	505 kDa	41	3124253	3247581	3045919	2901937	2771782	2729933	0.89232	0.0128878
145	Q9Y281	Cofilin-2	CFL2	19 kDa	7	2371775	2727662	4030873	4702651	5042310	4485158	1.55856	0.0662868
146	Q9UHY7	Enolase-phosphatase E1	ENOPH1	29 kDa	2	668387	821220	839527	897293	955990	814242	1.14529	0.178057
147	P09923	Intestinal-type alkaline phosphatase	ALPI	57 kDa	10	20642630	19621670	24425880	18670390	24421430	21347600	0.996124	0.971704
148	Q13867	Bleomycin hydrolase	BLMH	53 kDa	4	2642014	3256522	5878721	4938168	3801710	4196264	1.0984	0.7417
149	P26639	Threonine--tRNA ligase 1, cytoplasmic	TARS1	83 kDa	17	3047803	3711053	8369333	15592930	4333630	4711473	1.62862	0.495168
150	O00273	DNA fragmentation factor subunit alpha	DFFA	37 kDa	2	105263	69507.6	82628.4	97248.6	64928.6	36124.3	0.770406	0.402798
151	Q9Y265	RuvB-like 1	RUVBL1	50 kDa	10	7126311	6088076	9303677	6069042	6115511	5104105	0.767768	0.199639
152	P19971	Thymidine phosphorylase	TYMP	50 kDa	5	1076113	661927	993328	798723	654465	819281	0.831989	0.354291
153	P02790	Hemopexin	HPX	52 kDa	10	359431700	320447800	373968500	342426900	346413400	307069000	0.945022	0.397945
154	Q96AE4	Far upstream element-binding protein 1	FUBP1	68 kDa	12	20247560	22941130	26641110	25752730	31436460	29496170	1.24138	0.0880555
155	P13639	Elongation factor 2	EEF2	95 kDa	26	7761642	7842008	9862231	10176900	12109340	9702500	1.25614	0.0972987
156	O95633	Follistatin-related protein 3	FSTL3	28 kDa	2	156924	259897	327814	161308	431830	182549	1.0417	0.923781
157	P62937	Peptidyl-prolyl cis-trans isomerase A	PPIA	18 kDa	8	133963500	121162000	197391400	172061800	176659100	161855800	1.1283	0.499438
158	Q9HB71	Calcyclin-binding protein	CACYBP	26 kDa	6	11572720	13519110	13188500	12616030	18239300	11590730	1.10882	0.57647
159	Q02818	Nucleobindin-1	NUCB1	54 kDa	12	690343	3744224	3559807	4150607	477143	3933101	1.07086	0.908928
160	P00505	Aspartate aminotransferase, mitochondrial	GOT2	48 kDa	8	21600540	19370780	22164370	21879620	25186700	20048220	1.06302	0.496101
161	P31153	S-adenosylmethionine synthase isoform type-2	MAT2A	44 kDa	7	1674759	5499637	2948435	1674264	3197993	4249561	0.901113	0.818708
162	P49368	T-complex protein 1 subunit gamma	CCT3	61 kDa	15	56135060	33069770	40068380	35968240	37593300	32830050	0.822998	0.380394
163	P07195	L-lactate dehydrogenase B chain	LDHB	37 kDa	10	31017900	17834530	19265040	13304390	35261430	14114990	0.920187	0.840553
164	O15143	Actin-related protein 2/3 complex subunit 1B	ARPC1B	41 kDa	3	376524	382868	280734	54050.5	21631.2	665455	0.712545	0.682615
165	P36871	Phosphoglucomutase-1	PGM1	61 kDa	17	6026214	6255050	7863710	6186721	6571639	6111369	0.936697	0.542301
166	Q96G03	Phosphoglucomutase-2	PGM2	68 kDa	8	1433958	1645067	1661807	1553444	1327309	1635727	0.952677	0.561682
167	P17174	Aspartate aminotransferase, cytoplasmic	GOT1	46 kDa	10	5559377	3986232	4782974	4830567	3829342	3833477	0.871921	0.343544
168	P22234	Multifunctional protein ADE2	PAICS	47 kDa	10	2161245	2455112	2050182	2954537	4926108	1803592	1.45266	0.384906
169	P31944	Caspase-14	CASP14	28 kDa	6	4014743	4904203	2015080	1336146	1015827	1176789	0.322732	0.100137
170	P13489	Ribonuclease inhibitor	RNH1	50 kDa	4	2173867	2422953	2832534	2706291	2872033	2878401	1.13829	0.210563
171	Q15029	116 kDa U5 small nuclear ribonucleoprotein component	EFTUD2	109 kDa	13	5037408	5840678	5164734	5178498	5762869	5438783	1.02103	0.730268
172	Q06323	Proteasome activator complex subunit 1	PSME1	29 kDa	7	18179620	15048460	14874580	12888890	12953690	13034770	0.808216	0.103157
173	P14625	Endoplasmin	HSP90B1	92 kDa	13	16409780	16838800	18075710	16698380	19081580	20658050	1.09964	0.275701
174	O75874	Isocitrate dehydrogenase [NADP] cytoplasmic	IDH1	47 kDa	8	1480680	1932046	2328836	2131399	2233082	3009595	1.28433	0.216434
175	P35908	Keratin, type II cytoskeletal 2 epidermal	KRT2	65 kDa	21	363237900	246110700	298076700	127630700	108315800	109950600	0.381185	0.0279436
176	Q06124	Tyrosine-protein phosphatase non-receptor type 11	PTPN11	68 kDa	11	1818599	1983926	2085305	1839787	2415269	1980061	1.05898	0.588379
177	P30046	D-dopachrome decarboxylase	DDT	13 kDa	1	4074614	5496830	8530434	5755325	6418515	6112792	1.01021	0.967071
178	P09211	Glutathione S-transferase P	GSTP1	23 kDa	3	306213	780589	1236788	1154659	1244586	1035094	1.47803	0.300493
179	P40227	T-complex protein 1 subunit zeta	CCT6A	58 kDa	12	8430758	5622500	4987064	5241985	12675090	8720555	1.39901	0.369715
180	Q7L2J0	7SK snRNA methylphosphate capping enzyme	MEPCE	74 kDa	1	Missing Value	Missing Value	Missing Value	Missing Value	Missing Value	Missing Value	-	-
181	P46777	60S ribosomal protein L5	RPL5	34 kDa	7	6435903	7797937	11417050	13179580	13419390	14031740	1.58399	0.0743908
182	P30086	Phosphatidylethanolamine-binding protein 1	PEBP1	21 kDa	7	2617710	2451202	3465279	3895308	2984756	3102747	1.16974	0.319485
183	P0C0L4	Complement C4-A	C4A	193 kDa	10	171808800	204855700	259309500	194695600	213315500	205753300	0.965078	0.801213
184	P55287	Cadherin-11	CDH11	88 kDa	7	15979010	14894650	13814880	12527840	14383010	10904740	0.846203	0.13871
185	P17096	High mobility group protein HMG-I/HMG-Y	HMGA1	12 kDa	2	2178213	3560401	2827361	3832055	2339217	3502201	1.12929	0.57437
186	Q14117	Dihydropyrimidinase	DPYS	57 kDa	5	638309	818512	522663	1101038	759684	1151121	1.52153	0.0914124
187	P07814	Bifunctional glutamate/proline--tRNA ligase	EPRS1	171 kDa	28	8927206	10021800	12532640	12641180	12971080	12927190	1.22419	0.157122
188	P28074	Proteasome subunit beta type-5	PSMB5	28 kDa	7	391150	498512	647270	686272	675270	709837	1.34774	0.136052
189	P20618	Proteasome subunit beta type-1	PSMB1	26 kDa	6	5963206	8889676	8785628	10069400	10113720	9503119	1.25584	0.165607
190	Q86UP2	Kinectin	KTN1	156 kDa	18	4796010	7198201	7830084	7970314	7282914	6724730	1.10864	0.528963
191	Q13200	26S proteasome non-ATPase regulatory subunit 2	PSMD2	100 kDa	11	6435288	6687716	6565436	6455060	6567859	6031993	0.967822	0.328704
192	P39023	60S ribosomal protein L3	RPL3	46 kDa	4	613097	1006296	1507544	1085719	1237436	1233364	1.13738	0.638087
193	P07737	Profilin-1	PFN1	15 kDa	6	34806460	51499380	64436520	50803990	55600610	50492960	1.04083	0.834791
194	Q9NR45	Sialic acid synthase	NANS	40 kDa	3	986678	804856	806010	1762623	1350107	1179086	1.65226	0.0694944
195	P50454	Serpin H1	SERPINH1	46 kDa	10	340939	53841.8	436266	212680	382310	150526	0.897081	0.844262
196	P61769	Beta-2-microglobulin	B2M	14 kDa	2	2191893	1042694	1566421	942171	1514232	940129	0.707462	0.304286
197	Q99598	Translin-associated protein X	TSNAX	33 kDa	5	1470141	1063843	1124266	1294733	1260979	1090577	0.99673	0.97932
198	Q99435	Protein kinase C-binding protein NELL2	NELL2	91 kDa	9	17103410	15587660	14911720	14412480	16448690	17536860	1.01671	0.826014
199	Q00688	Peptidyl-prolyl cis-trans isomerase FKBP3	FKBP3	25 kDa	7	400932	538301	921933	663452	520704	811680	1.07236	0.815919
200	P19623	Spermidine synthase	SRM	34 kDa	5	3311944	3047836	3168280	3779996	3743308	3003844	1.10486	0.317522
201	P03973	Antileukoproteinase	SLPI	14 kDa	2	1403767	1710550	1513182	1700212	1779965	1430744	1.06125	0.533919
202	P84077	ADP-ribosylation factor 1	ARF1	21 kDa	6	96613.9	209178	397486	816124	782963	594640	3.11929	0.0127064
203	Q6P2Q9	Pre-mRNA-processing-splicing factor 8	PRPF8	274 kDa	10	3165314	2340949	2649063	3765940	2003359	1947360	0.946211	0.836772
204	P56537	Eukaryotic translation initiation factor 6	EIF6	27 kDa	3	2754344	4226337	4323469	3419824	3894846	4318340	1.02909	0.859888
205	P50395	Rab GDP dissociation inhibitor beta	GDI2	51 kDa	22	5735366	6880844	8229010	6670101	7066099	6112490	0.952194	0.700354
206	Q9BV20	Methylthioribose-1-phosphate isomerase	MRI1	39 kDa	9	5183954	4762688	4900102	4091142	5007783	4726914	0.931237	0.341827
207	P50583	Bis(5'-nucleosyl)-tetraphosphatase [asymmetrical]	NUDT2	17 kDa	2	216719	371072	388393	387562	431336	378608	1.22672	0.3076
208	Q9Y2T3	Guanine deaminase	GDA	51 kDa	8	2154899	2711674	3539428	2600536	3112848	2792673	1.0119	0.943746
209	P26358	DNA (cytosine-5)-methyltransferase 1	DNMT1	183 kDa	3	223778	278261	212322	315303	228730	319073	1.20822	0.24711
210	Q9UHD1	Cysteine and histidine-rich domain-containing protein 1	CHORDC1	37 kDa	5	1299680	3329719	3274075	1212598	1235182	2365479	0.609005	0.267934
211	P11766	Alcohol dehydrogenase class-3	ADH5	40 kDa	3	1410382	1444643	1595713	1461463	1658781	1506413	1.03953	0.516554
212	P06702	Protein S100-A9	S100A9	13 kDa	1	377148	1398294	24296	688706	25810.9	675868	0.772548	0.788705
213	Q9Y5S9	RNA-binding protein 8A	RBM8A	20 kDa	3	1772249	2367006	3227749	2626090	3096492	2801764	1.1571	0.462736
214	P01033	Metalloproteinase inhibitor 1	TIMP1	23 kDa	4	5424661	6894600	6125995	5413463	8839784	9335644	1.27886	0.297451
215	P20930	Filaggrin	FLG	435 kDa	3	740928	2261538	278304	471569	631719	573683	0.511152	0.466524
216	P16401	Histone H1.5	H1-5	23 kDa	1	1222469	2724014	3975877	2100344	3267585	2316284	0.96994	0.933696
217	P40121	Macrophage-capping protein	CAPG	38 kDa	4	2086537	2486057	2866511	4026105	2976241	2178359	1.23411	0.398655
218	Q02878	60S ribosomal protein L6	RPL6	33 kDa	9	3893115	4383051	7089039	4288648	4982451	4242279	0.879479	0.601647
219	P07437	Tubulin beta chain	TUBB	50 kDa	17	9335931	9279000	8680052	11050590	9065728	9016769	1.06734	0.461599
220	P04179	Superoxide dismutase [Mn], mitochondrial	SOD2	25 kDa	3	2154506	2901733	2975062	3569721	3232160	3400489	1.27033	0.096139
221	Q9H4A4	Aminopeptidase B	RNPEP	73 kDa	13	7289258	9718887	12215510	10366170	10373310	9098546	1.02102	0.901166
222	Q08554	Desmocollin-1	DSC1	100 kDa	4	3100595	1086509	974025	1464881	1457748	1880294	0.930595	0.880014
223	Q96IR7	4-hydroxyphenylpyruvate dioxygenase-like protein	HPDL	39 kDa	5	2592494	3624805	6020057	4879882	4172745	3887370	1.05742	0.842568
224	P07910	Heterogeneous nuclear ribonucleoproteins C1/C2	HNRNPC	34 kDa	3	14194030	17880530	17780570	20670430	20724200	23094100	1.29352	0.0352998
225	Q15393	Splicing factor 3B subunit 3	SF3B3	136 kDa	12	8297809	11511160	12311120	11358920	12393680	10655300	1.07123	0.610287
226	Q9UBQ5	Eukaryotic translation initiation factor 3 subunit K	EIF3K	25 kDa	4	1062003	821297	916058	761403	897524	766571	0.866448	0.219841
227	Q9P258	Protein RCC2	RCC2	56 kDa	8	15274080	16445220	23842050	18166320	23095190	18453790	1.07476	0.685171
228	Q12860	Contactin-1	CNTN1	113 kDa	11	24816200	28156170	23457220	24734240	24381060	25646920	0.978184	0.733532
229	O60506	Heterogeneous nuclear ribonucleoprotein Q	SYNCRIP	70 kDa	11	8583046	9080661	10478380	12408670	11931890	11367510	1.26885	0.028637
230	Q9Y383	Putative RNA-binding protein Luc7-like 2	LUC7L2	47 kDa	4	1207555	1862042	1743535	1955371	1625513	2346703	1.23154	0.269225
231	Q7Z422	SUZ domain-containing protein 1	SZRD1	17 kDa	1	142853	261487	242122	183332	124197	288970	0.922716	0.797983
232	P38117	Electron transfer flavoprotein subunit beta	ETFB	28 kDa	3	4008915	2715914	2943464	1895758	2740694	1808776	0.666636	0.102338
233	P15259	Phosphoglycerate mutase 2	PGAM2	29 kDa	4	247183	285052	1090504	834508	1169618	1292901	2.03177	0.168942
234	O15067	Phosphoribosylformylglycinamidine synthase	PFAS	145 kDa	10	711892	807219	1047960	1133785	1316672	1107104	1.38584	0.0599122
235	P08174	Complement decay-accelerating factor	CD55	41 kDa	3	2719035	2914313	2637782	2565788	2544603	2431780	0.911867	0.0785632
236	P48506	Glutamate--cysteine ligase catalytic subunit	GCLC	73 kDa	9	261920	1032549	892735	731809	553760	819649	0.962516	0.921207
237	Q16555	Dihydropyrimidinase-related protein 2	DPYSL2	62 kDa	9	4317397	4560458	4758596	4234298	4748288	4679381	1.00187	0.969066
238	P26640	Valine--tRNA ligase	VARS1	140 kDa	11	2813373	3304563	3164257	3233665	3482301	2718585	1.01641	0.860452
239	Q9BQA1	Methylosome protein 50	WDR77	37 kDa	6	4739064	5070391	6328719	5401002	5334787	5033106	0.977118	0.825548
240	P49189	4-trimethylaminobutyraldehyde dehydrogenase	ALDH9A1	54 kDa	7	764887	819715	1114770	1781631	1952900	659951	1.62796	0.29621
241	P09874	Poly [ADP-ribose] polymerase 1	PARP1	113 kDa	19	20560720	21845030	27250910	21177690	25722330	23197840	1.00633	0.955214
242	P30740	Leukocyte elastase inhibitor	SERPINB1	43 kDa	12	7901766	9908870	14623300	11285210	13768420	11499270	1.127	0.573584
243	P31151	Protein S100-A7	S100A7	11 kDa	4	1153050	2224216	1141178	3151965	592872	2970492	1.4862	0.48036
244	P05121	Plasminogen activator inhibitor 1	SERPINE1	45 kDa	3	426343	550756	558709	694495	620030	810009	1.38333	0.0519697
245	P27797	Calreticulin	CALR	48 kDa	6	1467041	1624125	2043693	1846705	1534386	1978201	1.04371	0.748412
246	P54578	Ubiquitin carboxyl-terminal hydrolase 14	USP14	56 kDa	5	9781309	11234480	12833770	12310600	14230720	12956080	1.16685	0.158887
247	Q01082	Spectrin beta chain, non-erythrocytic 1	SPTBN1	275 kDa	41	14416590	11410830	15776340	15204230	12721590	20326010	1.15979	0.450592
248	P40925	Malate dehydrogenase, cytoplasmic	MDH1	36 kDa	5	19073060	23153990	38620780	24591730	36408360	26898650	1.08721	0.756151
249	Q14152	Eukaryotic translation initiation factor 3 subunit A	EIF3A	167 kDa	14	6900447	7489241	8260503	8077077	7951225	7156427	1.0236	0.735099
250	P13647	Keratin, type II cytoskeletal 5	KRT5	62 kDa	23	72140250	33276650	52755490	55106320	45293650	47525180	0.935215	0.793194
251	P45974	Ubiquitin carboxyl-terminal hydrolase 5	USP5	96 kDa	13	6894131	8134838	8021303	7486191	8252408	8682359	1.05947	0.436674
252	P15559	NAD(P)H dehydrogenase [quinone] 1	NQO1	31 kDa	2	3345902	2369906	3577733	3272393	3492260	3150612	1.0669	0.636786
253	P59998	Actin-related protein 2/3 complex subunit 4	ARPC4	20 kDa	3	7132087	5380659	5441555	5406330	5917615	4827137	0.899566	0.424191
254	Q9H4F8	SPARC-related modular calcium-binding protein 1	SMOC1	48 kDa	5	2661658	2745853	2277861	2104950	2809157	2576982	0.97472	0.811555
255	O60841	Eukaryotic translation initiation factor 5B	EIF5B	139 kDa	12	2688787	3252402	3280814	2904863	4046104	2857966	1.06364	0.683196
256	P41250	Glycine--tRNA ligase	GARS1	83 kDa	10	7923694	12034610	12513990	13216520	13400180	12314960	1.19892	0.275131
257	P33992	DNA replication licensing factor MCM5	MCM5	82 kDa	14	14629900	12369100	13690940	15086930	16778180	13939420	1.1257	0.184479
258	P04259	Keratin, type II cytoskeletal 6B	KRT6B	60 kDa	21	1591965	282087	304650	5373173	1294712	5396971	5.53764	0.126492
259	P51665	26S proteasome non-ATPase regulatory subunit 7	PSMD7	37 kDa	5	2556901	1529112	2093586	1969413	2184325	1908146	0.980951	0.909067
260	Q9BXV9	EKC/KEOPS complex subunit GON7	GON7	11 kDa	1	462854	561280	584933	768062	646372	614316	1.26082	0.083055
261	P01024	Complement C3	C3	187 kDa	15	8441382	7897074	6921594	8177679	429693400	7462982	19.1459	0.422467
262	O75608	Acyl-protein thioesterase 1	LYPLA1	25 kDa	3	1523789	1984647	1510844	1213905	1933383	1587193	0.943259	0.734572
263	Q92979	Ribosomal RNA small subunit methyltransferase NEP1	EMG1	27 kDa	3	980712	1272910	1699490	1374348	1493289	1471076	1.09754	0.602627
264	P08237	ATP-dependent 6-phosphofructokinase, muscle type	PFKM	85 kDa	6	1219210	1283292	1850919	2308695	1763710	1226988	1.21729	0.451115
265	P33993	DNA replication licensing factor MCM7	MCM7	81 kDa	12	6029927	5778652	6242906	5645920	5592817	5429357	0.923364	0.0562713
266	P27816	Microtubule-associated protein 4	MAP4	121 kDa	6	5257098	5727116	6329775	6375012	5741307	6691616	1.08629	0.299691
267	Q92597	Protein NDRG1	NDRG1	43 kDa	2	278744	218462	389404	364495	347354	360754	1.20978	0.340901
268	P13797	Plastin-3	PLS3	71 kDa	18	2241217	1648005	3851386	2250271	3964504	2692672	1.15074	0.666953
269	P78417	Glutathione S-transferase omega-1	GSTO1	28 kDa	5	12035080	15680060	18256010	18232680	16977200	16262950	1.11968	0.420057
270	Q15459	Splicing factor 3A subunit 1	SF3A1	89 kDa	13	10833350	11539970	15256200	12127540	12174950	10546830	0.926117	0.580084
271	Q9UBR2	Cathepsin Z	CTSZ	34 kDa	5	1789966	1351383	1520436	1391061	2004802	1372106	1.02278	0.892989
272	Q96C86	m7GpppX diphosphatase	DCPS	39 kDa	5	1705275	2269688	2739400	2556121	2574485	2252370	1.09958	0.541802
273	Q9BYZ2	L-lactate dehydrogenase A-like 6B	LDHAL6B	42 kDa	1	261130	753596	424694	934473	317853	2041563	2.28834	0.345071
274	O95340	Bifunctional 3'-phosphoadenosine 5'-phosphosulfate synthase 2	PAPSS2	70 kDa	3	605180	878363	632043	640448	699454	721102	0.974201	0.85659
275	P09382	Galectin-1	LGALS1	15 kDa	2	3267363	3490339	3644303	3620661	3836871	3382069	1.04207	0.443057
276	P01031	Complement C5	C5	188 kDa	4	11680750	12800790	10796230	10327700	6144425	7910811	0.69117	0.0773009
277	P35625	Metalloproteinase inhibitor 3	TIMP3	24 kDa	4	4806743	3939013	4502778	4227614	4386749	4020610	0.953688	0.517519
278	Q9BRA2	Thioredoxin domain-containing protein 17	TXNDC17	14 kDa	4	2943978	4106371	5348364	5581437	7291099	4571136	1.40689	0.187263
279	Q16543	Hsp90 co-chaperone Cdc37	CDC37	44 kDa	5	27277.1	20559.4	11421.6	149334	195853	70523.3	7.01525	0.0808996
280	Q9NYF8	Bcl-2-associated transcription factor 1	BCLAF1	106 kDa	5	1289477	525151	1968879	1893098	608777	1531938	1.06616	0.88995
281	O15371	Eukaryotic translation initiation factor 3 subunit D	EIF3D	64 kDa	7	3037003	4026375	2639772	4086262	4355563	3930071	1.27504	0.155004
282	Q14694	Ubiquitin carboxyl-terminal hydrolase 10	USP10	87 kDa	5	2442731	1290280	1566334	1541886	2225423	1589849	1.01091	0.965265
283	Q14566	DNA replication licensing factor MCM6	MCM6	93 kDa	16	11432450	12087490	13901700	11746810	13753010	11716850	0.994523	0.948818
284	P02533	Keratin, type I cytoskeletal 14	KRT14	52 kDa	17	21730990	9771831	12504720	21484120	13707630	27582600	1.42645	0.312144
285	Q14204	Cytoplasmic dynein 1 heavy chain 1	DYNC1H1	532 kDa	39	13766290	13245520	14185780	11997130	12365490	12295310	0.889808	0.0188934
286	Q13418	Integrin-linked protein kinase	ILK	51 kDa	9	10514700	9891369	9982689	10004610	8958685	9069840	0.922484	0.12723
287	O43681	ATPase GET3	GET3	39 kDa	5	4543960	4277677	3928125	3463567	4485847	3688694	0.91281	0.372284
288	O76070	Gamma-synuclein	SNCG	13 kDa	3	1068268	1853498	1224667	1620372	1948635	1513586	1.22577	0.334221
289	P68371	Tubulin beta-4B chain	TUBB4B	50 kDa	16	6104127	7393689	6107090	5595132	7664146	6441339	1.00488	0.967807
290	P81605	Dermcidin	DCD	11 kDa	2	8630285	2846482	4192193	2059965	2549419	2285028	0.440004	0.235574
291	Q9H6X2	Anthrax toxin receptor 1	ANTXR1	63 kDa	4	692624	656234	768838	900172	641156	779598	1.09597	0.473418
292	Q13620	Cullin-4B	CUL4B	104 kDa	9	2504157	1295606	1449649	1328434	1263788	1278442	0.737352	0.349797
293	P07355	Annexin A2	ANXA2	39 kDa	13	9928865	10884690	13401100	8233547	9136356	9067062	0.77268	0.120426
294	O95996	Adenomatous polyposis coli protein 2	APC2	244 kDa	1	Missing Value	Missing Value	Missing Value	Missing Value	Missing Value	Missing Value	-	-
295	Q6YN16	Hydroxysteroid dehydrogenase-like protein 2	HSDL2	45 kDa	3	381291	524644	457894	370156	363073	449054	0.866886	0.299795
296	O43242	26S proteasome non-ATPase regulatory subunit 3	PSMD3	61 kDa	8	361641	284616	379601	529065	405946	361796	1.26412	0.210719
297	Q04760	Lactoylglutathione lyase	GLO1	21 kDa	3	6488642	7143035	13228640	12497210	13068860	11669360	1.38626	0.24595
298	Q9BWD1	Acetyl-CoA acetyltransferase, cytosolic	ACAT2	41 kDa	3	2591694	2715870	3797809	3030581	3220714	3366128	1.05624	0.703607
299	P07602	Prosaposin	PSAP	58 kDa	10	19447640	18185410	23524120	16688940	28420170	21712860	1.09263	0.651731
300	Q14651	Plastin-1	PLS1	70 kDa	5	3083678	2840610	4656809	4835619	3558013	4154346	1.18589	0.396941
301	O00625	Pirin	PIR	32 kDa	4	1076087	1294788	1588502	2030508	1425202	2093708	1.40159	0.119212
302	Q15437	Protein transport protein Sec23B	SEC23B	86 kDa	6	1238516	1045730	1323294	1512657	1247379	1398073	1.15262	0.178321
303	O75531	Barrier-to-autointegration factor	BANF1	10 kDa	2	346344	869759	1336020	970166	1429734	1291242	1.4463	0.320232
304	P46087	Probable 28S rRNA (cytosine(4447)-C(5))-methyltransferase	NOP2	89 kDa	9	4900172	5123234	5403226	4684969	5453194	4837669	0.970778	0.620709
305	O00429	Dynamin-1-like protein	DNM1L	82 kDa	13	5336011	3593161	4290405	4406938	3986009	3527153	0.901701	0.501132
306	P53621	Coatomer subunit alpha	COPA	138 kDa	13	33828040	22788170	29402050	9537017	23139000	6103289	0.450826	0.0738651
307	P01023	Alpha-2-macroglobulin	A2M	163 kDa	6	8104651	7682218	9272421	9461132	9805190	10034710	1.16927	0.0838396
308	Q9NR30	Nucleolar RNA helicase 2	DDX21	87 kDa	11	8506743	8391149	10864860	10678730	9891912	10365370	1.1143	0.31879
309	P00533	Epidermal growth factor receptor	EGFR	134 kDa	7	1587005	1424125	1333104	1382354	1102541	2186655	1.07534	0.771875
310	P10768	S-formylglutathione hydrolase	ESD	31 kDa	3	1136900	1789475	1456606	1378822	1135847	1885853	1.004	0.984921
311	Q14978	Nucleolar and coiled-body phosphoprotein 1	NOLC1	74 kDa	4	895688	932641	845549	1716536	1982175	1596898	1.9805	0.0132846
312	Q13283	Ras GTPase-activating protein-binding protein 1	G3BP1	52 kDa	9	6965438	7270562	7017584	8015184	7614099	7481729	1.08739	0.0400691
313	P30044	Peroxiredoxin-5, mitochondrial	PRDX5	22 kDa	5	18444640	20271110	27395440	19739920	28389790	25763400	1.11771	0.526603
314	P15374	Ubiquitin carboxyl-terminal hydrolase isozyme L3	UCHL3	26 kDa	4	1636363	2087311	2409212	2304074	2501541	2424917	1.17898	0.240297
315	P17987	T-complex protein 1 subunit alpha	TCP1	60 kDa	17	4540065	3016366	2616598	1921658	2516342	1761875	0.609442	0.139887
316	P12273	Prolactin-inducible protein	PIP	17 kDa	2	1311231	373023	486794	588433	419448	722175	0.796876	0.674259
317	O76021	Ribosomal L1 domain-containing protein 1	RSL1D1	55 kDa	4	3930166	3344558	3492843	3078370	3188279	2620934	0.825403	0.0642839
318	Q5T4S7	E3 ubiquitin-protein ligase UBR4	UBR4	574 kDa	12	2326661	1926612	1855224	1829725	2224067	2522669	1.07661	0.567296
319	P30566	Adenylosuccinate lyase	ADSL	55 kDa	9	2158932	1989805	2803333	2862608	2974931	3178422	1.29687	0.0950387
320	P09960	Leukotriene A-4 hydrolase	LTA4H	69 kDa	13	8269042	7511294	8870371	8615081	8226769	8204246	1.01604	0.775946
321	Q9Y617	Phosphoserine aminotransferase	PSAT1	40 kDa	11	26520030	40124780	39610150	34004700	55536540	42801480	1.24552	0.326652
322	Q02790	Peptidyl-prolyl cis-trans isomerase FKBP4	FKBP4	52 kDa	17	6991044	8360985	11717620	9489158	10417990	9140630	1.07308	0.68972
323	Q9NRX4	14 kDa phosphohistidine phosphatase	PHPT1	14 kDa	2	161881	194313	197369	131121	176594	79904.6	0.700227	0.176159
324	P20700	Lamin-B1	LMNB1	66 kDa	11	8662953	10180350	11178600	8469697	9210435	9481826	0.904738	0.324385
325	P08603	Complement factor H	CFH	139 kDa	2	2766978	2516149	2218858	2029465	1934884	1995555	0.794444	0.0791473
326	P55884	Eukaryotic translation initiation factor 3 subunit B	EIF3B	92 kDa	13	11024690	12739420	12426450	12475100	13695180	14594870	1.1264	0.134343
327	P47897	Glutamine--tRNA ligase	QARS1	88 kDa	10	4094283	4154715	4949773	4861811	4529867	4643341	1.06336	0.423421
328	P42765	3-ketoacyl-CoA thiolase, mitochondrial	ACAA2	42 kDa	3	1628183	1261000	979892	950419	1115379	1029131	0.799915	0.301259
329	P28062	Proteasome subunit beta type-8	PSMB8	30 kDa	4	133658	294815	400093	1854963	235840	409154	3.01721	0.391255
330	P00488	Coagulation factor XIII A chain	F13A1	83 kDa	2	3038314	3642727	2736124	3215750	3264003	2690060	0.973734	0.813029
331	P23193	Transcription elongation factor A protein 1	TCEA1	34 kDa	5	925820	1263177	1464801	1178107	1104168	1131139	0.93421	0.662161
332	Q9H1E3	Nuclear ubiquitous casein and cyclin-dependent kinase substrate 1	NUCKS1	27 kDa	3	889627	1280493	764630	1041032	1035798	1123707	1.09057	0.628189
333	P60174	Triosephosphate isomerase	TPI1	31 kDa	10	7082745	10365730	16318360	10241520	13247460	13116370	1.08406	0.767535
334	O43175	D-3-phosphoglycerate dehydrogenase	PHGDH	57 kDa	9	5756222	3758930	5758801	4254024	5017051	5202479	0.947597	0.740068
335	P25205	DNA replication licensing factor MCM3	MCM3	91 kDa	10	3664727	4110968	4012989	4013751	4906713	4073182	1.10221	0.300848
336	P07203	Glutathione peroxidase 1	GPX1	22 kDa	6	1993894	1915728	2246201	2012042	1937884	1921926	0.95387	0.445699
337	Q9NZL9	Methionine adenosyltransferase 2 subunit beta	MAT2B	38 kDa	5	2458506	3398686	3697091	3200804	3940956	3533339	1.11731	0.445634
338	Q9Y230	RuvB-like 2	RUVBL2	51 kDa	10	25290640	36945790	28375610	18437870	27944250	24347830	0.78058	0.214471
339	P01375	Tumor necrosis factor	TNF	26 kDa	3	Missing Value	Missing Value	7917.85	2486036	2668365	1774802	-	-
340	Q96EK6	Glucosamine 6-phosphate N-acetyltransferase	GNPNAT1	21 kDa	5	5977004	5796667	7364021	6541842	5583056	6848420	0.991411	0.934599
341	P30520	Adenylosuccinate synthetase isozyme 2	ADSS2	50 kDa	8	3575090	4515700	4599238	4478992	5062514	4243844	1.08631	0.426128
342	P30048	Thioredoxin-dependent peroxide reductase, mitochondrial	PRDX3	28 kDa	5	5383477	6217063	8399574	5737759	7281586	5798615	0.940893	0.726728
343	Q9BT73	Proteasome assembly chaperone 3	PSMG3	13 kDa	2	1730148	1146727	1213685	1544660	1299391	1279398	1.00804	0.960548
344	Q14166	Tubulin--tyrosine ligase-like protein 12	TTLL12	74 kDa	6	2684448	2990533	3849234	3558005	3137570	2878041	1.00519	0.969694
345	Q8IYD1	Eukaryotic peptide chain release factor GTP-binding subunit ERF3B	GSPT2	69 kDa	5	855605	1046951	1511598	1880519	1364343	1593089	1.41703	0.130048
346	P19338	Nucleolin	NCL	77 kDa	4	21814970	36150200	15511770	29260610	40462730	34911400	1.42405	0.228684
347	P35030	Trypsin-3	PRSS3	33 kDa	2	12645270	8286156	7613330	6272684	1519318	6738766	0.509052	0.111769
348	P50402	Emerin	EMD	29 kDa	2	171211	293053	220092	249466	220032	243581	1.04197	0.815246
349	Q9Y266	Nuclear migration protein nudC	NUDC	38 kDa	5	6070915	6508842	7997313	8031322	8142934	8013283	1.17546	0.174448
350	Q92688	Acidic leucine-rich nuclear phosphoprotein 32 family member B	ANP32B	29 kDa	4	10558890	16704950	22116870	15993560	19995350	17032280	1.07372	0.758907
351	Q12931	Heat shock protein 75 kDa, mitochondrial	TRAP1	80 kDa	11	10526500	10841940	11966190	10473330	12702730	10991830	1.025	0.74953
352	Q9HAV4	Exportin-5	XPO5	136 kDa	9	1713286	1648269	2018902	2125725	2028044	1751329	1.09751	0.336048
353	Q99733	Nucleosome assembly protein 1-like 4	NAP1L4	43 kDa	4	1658921	2870019	2413647	3404322	3067897	3282998	1.40513	0.108328
354	Q16836	Hydroxyacyl-coenzyme A dehydrogenase, mitochondrial	HADH	34 kDa	4	260590	870671	686572	1097178	1209722	1605613	2.1523	0.0437001
355	P37802	Transgelin-2	TAGLN2	22 kDa	8	4465699	4691826	5145863	3384907	4646564	4843058	0.900103	0.416017
356	P31949	Protein S100-A11	S100A11	12 kDa	4	18890490	22311430	30334210	29780160	27980440	19613360	1.08161	0.695178
357	P43243	Matrin-3	MATR3	95 kDa	3	2581051	3291444	3884311	3272263	3967169	2668986	1.01554	0.928834
358	Q15063	Periostin	POSTN	93 kDa	14	44251.3	Missing Value	37793.2	Missing Value	459500	Missing Value	-	-
359	Q9UNM6	26S proteasome non-ATPase regulatory subunit 13	PSMD13	43 kDa	11	3515778	3903276	3364199	2884276	3661722	2891568	0.875206	0.227138
360	Q9Y285	Phenylalanine--tRNA ligase alpha subunit	FARSA	58 kDa	2	555195	361801	888089	869221	1065885	835095	1.53467	0.159565
361	P32119	Peroxiredoxin-2	PRDX2	22 kDa	4	8079534	9871797	11997680	8599185	8272148	9162625	0.869276	0.368486
362	Q01813	ATP-dependent 6-phosphofructokinase, platelet type	PFKP	86 kDa	11	6821112	7525220	9764784	8602084	8771382	7255538	1.02148	0.87476
363	P42285	Exosome RNA helicase MTR4	MTREX	118 kDa	8	2868683	2123814	2389077	2766643	2469305	2878954	1.09935	0.39711
364	P49458	Signal recognition particle 9 kDa protein	SRP9	10 kDa	1	1343100	1088714	1972085	1208076	1817695	1270397	0.975537	0.918089
365	P60900	Proteasome subunit alpha type-6	PSMA6	27 kDa	10	9605809	14197490	11783550	14283490	12015420	10563120	1.03583	0.81659
366	O60664	Perilipin-3	PLIN3	47 kDa	6	4865325	5655133	5864106	6575096	5409310	4661915	1.01598	0.899057
367	Q8NBP7	Proprotein convertase subtilisin/kexin type 9	PCSK9	74 kDa	4	581503	691782	663053	698963	354988	617438	0.863171	0.489946
368	O95831	Apoptosis-inducing factor 1, mitochondrial	AIFM1	67 kDa	8	10452000	8857933	9779537	8546672	9013087	8834021	0.907331	0.184125
369	O75223	Gamma-glutamylcyclotransferase	GGCT	21 kDa	3	2277249	2694298	3441947	2361337	3152349	2914895	1.00179	0.99095
370	P20042	Eukaryotic translation initiation factor 2 subunit 2	EIF2S2	38 kDa	5	4350449	3754871	4930957	4309653	4381209	3932803	0.968349	0.735688
371	P35244	Replication protein A 14 kDa subunit	RPA3	14 kDa	4	2224346	2616316	2682544	2252939	2550021	2297269	0.943777	0.461497
372	Q9BQ61	Telomerase RNA component interacting RNase	TRIR	18 kDa	1	82492.6	67292.7	137563	155726	167438	140898	1.61498	0.0967657
373	P43121	Cell surface glycoprotein MUC18	MCAM	72 kDa	2	1040501	1507074	640269	1100734	810339	1411708	1.04233	0.890642
374	P15291	Beta-1,4-galactosyltransferase 1	B4GALT1	44 kDa	2	395259	170484	109905	474471	317908	540466	1.97269	0.119949
375	P15311	Ezrin	EZR	69 kDa	11	3919698	5850010	7251142	5578895	6157946	5078380	0.987919	0.951345
376	P53618	Coatomer subunit beta	COPB1	107 kDa	8	4929695	4496671	4625099	5320374	4319236	5106807	1.04946	0.539001
377	Q13435	Splicing factor 3B subunit 2	SF3B2	100 kDa	5	3975131	4693057	4996661	4983326	4242978	4825552	1.02832	0.75103
378	Q9H910	Jupiter microtubule associated homolog 2	JPT2	20 kDa	4	900261	1337232	2262582	2064861	1665932	2247582	1.32851	0.349209
379	P26373	60S ribosomal protein L13	RPL13	24 kDa	2	2924795	3355703	5188486	4463361	3975100	3964974	1.08148	0.701093
380	P17693	HLA class I histocompatibility antigen, alpha chain G	HLA-G	38 kDa	2	1033344	1133384	1279686	1378433	1372278	1017945	1.0935	0.491513
381	P30711	Glutathione S-transferase theta-1	GSTT1	27 kDa	1	433820	61388.1	112115	25955.6	64861.8	8422.41	0.163405	0.282484
382	P14550	Aldo-keto reductase family 1 member A1	AKR1A1	37 kDa	5	3839113	3483280	1267033	3504932	2226366	4077424	1.14195	0.700349
383	P52815	39S ribosomal protein L12, mitochondrial	MRPL12	21 kDa	2	1837054	2360598	2945569	2517503	2483307	2704054	1.07863	0.620878
384	Q7L5N1	COP9 signalosome complex subunit 6	COPS6	36 kDa	4	494838	556463	917645	600884	721024	679639	1.01656	0.942982
385	P11388	DNA topoisomerase 2-alpha	TOP2A	174 kDa	12	2851553	3016466	3975895	2530608	2084060	2288161	0.701228	0.0938462
386	P08865	40S ribosomal protein SA	RPSA	33 kDa	7	26156040	26228430	39007220	29076460	28741030	26282450	0.920214	0.629495
387	Q08945	FACT complex subunit SSRP1	SSRP1	81 kDa	7	5331297	7330567	6621476	8172518	8216812	8142442	1.27217	0.0958439
388	O75390	Citrate synthase, mitochondrial	CS	52 kDa	5	4193132	4413257	5211323	5083250	4893929	5286386	1.10464	0.25562
389	P35270	Sepiapterin reductase	SPR	28 kDa	3	1152307	886090	1016139	953131	1269410	774772	0.981266	0.914542
390	Q6PKG0	La-related protein 1	LARP1	124 kDa	6	1094659	1283423	1581845	1597710	1732515	1583059	1.24075	0.143969
391	Q8NHP1	Aflatoxin B1 aldehyde reductase member 4	AKR7L	37 kDa	2	207982	185785	551773	503541	411831	98951.4	1.07275	0.899468
392	P05198	Eukaryotic translation initiation factor 2 subunit 1	EIF2S1	36 kDa	8	11031460	11227600	12260850	11724100	11612460	10322600	0.975065	0.652639
393	P05109	Protein S100-A8	S100A8	11 kDa	2	7618.05	115184	27547.5	486722	10827.4	532054	6.84807	0.217566
394	O43765	Small glutamine-rich tetratricopeptide repeat-containing protein alpha	SGTA	34 kDa	4	76137.6	90977.2	88674.6	169177	100270	186015	1.78062	0.12245
395	Q96DG6	Carboxymethylenebutenolidase homolog	CMBL	28 kDa	3	2304314	2904962	1865593	1514492	2671968	3173802	1.04034	0.878444
396	P48444	Coatomer subunit delta	ARCN1	57 kDa	9	10645230	8400137	8372955	8051727	7413434	7810490	0.848909	0.203108
397	Q92820	Gamma-glutamyl hydrolase	GGH	36 kDa	5	2209658	2521747	2376798	2881708	3609769	2268955	1.23244	0.289215
398	Q92882	Osteoclast-stimulating factor 1	OSTF1	24 kDa	2	138777	241843	329857	305885	235406	137697	0.955678	0.893683
399	O60832	H/ACA ribonucleoprotein complex subunit DKC1	DKC1	58 kDa	7	2141758	2730290	2633745	2632285	2532857	3252952	1.12155	0.355584
400	O14745	Na(+)/H(+) exchange regulatory cofactor NHE-RF1	SLC9A3R1	39 kDa	4	275565	332390	399559	347647	501178	492523	1.33134	0.151101
401	P78330	Phosphoserine phosphatase	PSPH	25 kDa	5	5700804	5390776	6587980	6212035	7477869	6530797	1.14373	0.180656
402	P33316	Deoxyuridine 5'-triphosphate nucleotidohydrolase, mitochondrial	DUT	27 kDa	5	2879662	3658483	4272241	6092476	6554071	5295739	1.65973	0.0122968
403	P15924	Desmoplakin	DSP	332 kDa	19	6735112	3468526	4098160	4954613	4711535	4772597	1.00958	0.967803
404	P31939	Bifunctional purine biosynthesis protein PURH	ATIC	65 kDa	15	11718060	7324815	10389190	9675649	12613660	13387480	1.21217	0.294848
405	Q9Y696	Chloride intracellular channel protein 4	CLIC4	29 kDa	8	4736203	4022636	4389085	4521480	4311580	4606227	1.02216	0.696691
406	Q9NSD9	Phenylalanine--tRNA ligase beta subunit	FARSB	66 kDa	7	3745569	3619921	3791772	4278038	3481934	3735921	1.03035	0.681224
407	O43813	Glutathione S-transferase LANCL1	LANCL1	45 kDa	5	1843245	1811473	1138321	1045868	919947	1821401	0.790149	0.41074
408	Q14914	Prostaglandin reductase 1	PTGR1	36 kDa	8	7249199	9649053	10607060	9093063	10493030	9196025	1.04642	0.725471
409	P20849	Collagen alpha-1(IX) chain	COL9A1	92 kDa	3	3845699	4457200	4208528	4770643	3152945	4482879	0.991611	0.952185
410	Q13428	Treacle protein	TCOF1	152 kDa	5	1329002	1589823	1336165	2135576	1734957	1614623	1.28911	0.103685
411	P28838	Cytosol aminopeptidase	LAP3	56 kDa	10	1182319	1508948	1730869	1306856	1836052	1733604	1.10275	0.541571
412	Q8IZ83	Aldehyde dehydrogenase family 16 member A1	ALDH16A1	85 kDa	3	594642	549355	483877	679502	502726	512554	1.0411	0.755872
413	P48637	Glutathione synthetase	GSS	52 kDa	4	844109	750935	1268326	1142772	1259409	1230391	1.26864	0.245586
414	P12259	Coagulation factor V	F5	252 kDa	9	24852410	21676210	36727070	23476330	25081750	23139580	0.861174	0.489492
415	O76003	Glutaredoxin-3	GLRX3	37 kDa	6	4586943	6145707	6317888	6984315	6774337	6440993	1.18469	0.190172
416	P48740	Mannan-binding lectin serine protease 1	MASP1	79 kDa	3	5695136	6133889	9242162	7878012	8425631	5957846	1.05649	0.784514
417	Q13242	Serine/arginine-rich splicing factor 9	SRSF9	26 kDa	4	643333	822307	747892	716017	743455	736364	0.992005	0.920449
418	P30040	Endoplasmic reticulum resident protein 29	ERP29	29 kDa	4	2122453	3301415	4850998	4371234	3824455	4069200	1.19368	0.491306
419	Q9H074	Polyadenylate-binding protein-interacting protein 1	PAIP1	54 kDa	4	3529536	3773527	5170204	3669313	3817089	3698569	0.896715	0.489524
420	P12109	Collagen alpha-1(VI) chain	COL6A1	109 kDa	9	1153584	2925572	713598	334910	888606	1902554	0.652249	0.538622
421	Q15942	Zyxin	ZYX	61 kDa	4	692493	866033	1427598	929426	1003891	903281	0.949927	0.84384
422	Q9BQG0	Myb-binding protein 1A	MYBBP1A	149 kDa	12	3877902	3314632	3254577	2762904	3177899	3010034	0.856776	0.112813
423	P31948	Stress-induced-phosphoprotein 1	STIP1	63 kDa	18	6148575	8798119	9729724	8851507	9576060	8748952	1.10132	0.521768
424	P10909	Clusterin	CLU	52 kDa	6	13388720	8779977	13005290	11465760	9578058	11085920	0.913452	0.574012
425	P49736	DNA replication licensing factor MCM2	MCM2	102 kDa	17	17301140	20142100	22839340	19652200	20846290	21036120	1.02077	0.821918
426	Q16775	Hydroxyacylglutathione hydrolase, mitochondrial	HAGH	34 kDa	5	265321	375030	423701	306059	408548	502292	1.14365	0.527703
427	P49747	Cartilage oligomeric matrix protein	COMP	83 kDa	14	2782701	3034323	2646377	4698987	2865752	4424085	1.41655	0.171495
428	P14174	Macrophage migration inhibitory factor	MIF	12 kDa	1	51413220	76187480	94993840	72193980	81511450	91373690	1.10101	0.627614
429	Q32MZ4	Leucine-rich repeat flightless-interacting protein 1	LRRFIP1	89 kDa	6	1314844	1489684	1254274	1285064	1055606	1649712	0.983143	0.9115
430	P17844	Probable ATP-dependent RNA helicase DDX5	DDX5	69 kDa	16	5176099	4946432	5525676	4683313	4430599	5215863	0.915745	0.20605
431	O15347	High mobility group protein B3	HMGB3	23 kDa	3	2138964	2783493	1189993	3652210	2915808	3347243	1.62214	0.0942804
432	P41252	Isoleucine--tRNA ligase, cytoplasmic	IARS1	145 kDa	17	8330462	10037510	11658810	11205340	10881110	9165523	1.0408	0.743187
433	P08243	Asparagine synthetase [glutamine-hydrolyzing]	ASNS	64 kDa	4	3352849	2404616	3022642	3042577	2273209	2810434	0.925526	0.578091
434	P33240	Cleavage stimulation factor subunit 2	CSTF2	61 kDa	3	1310507	1603958	1498584	1517689	1309914	1494896	0.979481	0.794879
435	Q15257	Serine/threonine-protein phosphatase 2A activator	PTPA	41 kDa	2	3759887	4128545	4631980	5014942	4263399	4942697	1.13583	0.178983
436	P11362	Fibroblast growth factor receptor 1	FGFR1	92 kDa	7	1645432	1750950	1954182	1473856	1548688	1581843	0.860542	0.0981051
437	P62318	Small nuclear ribonucleoprotein Sm D3	SNRPD3	14 kDa	3	8857758	11025730	15722920	12555760	12273550	10202790	0.983871	0.935851
438	P31350	Ribonucleoside-diphosphate reductase subunit M2	RRM2	45 kDa	3	557316	141328	187323	59938.4	119529	116219	0.333744	0.27244
439	P53992	Protein transport protein Sec24C	SEC24C	118 kDa	5	2114551	1230588	1752623	1746620	1744137	1594883	0.997622	0.988983
440	Q6IBS0	Twinfilin-2	TWF2	40 kDa	5	889560	793763	1102967	966760	1323127	1105150	1.21848	0.21715
441	Q92859	Neogenin	NEO1	160 kDa	9	1140230	952793	1269888	1052347	1053226	708225	0.836715	0.284528
442	Q92841	Probable ATP-dependent RNA helicase DDX17	DDX17	80 kDa	17	8849340	9034101	10331670	10686310	10432900	8848455	1.06211	0.476
443	P00747	Plasminogen	PLG	91 kDa	4	1743556	219357	1080030	1508052	375740	1417010	1.08474	0.887983
444	O75347	Tubulin-specific chaperone A	TBCA	13 kDa	4	750751	1395320	819924	531059	876256	733650	0.721837	0.315806
445	Q9HCK4	Roundabout homolog 2	ROBO2	151 kDa	6	1482245	1674724	1829205	2414789	2725725	2576088	1.5476	0.00261127
446	Q9NSE4	Isoleucine--tRNA ligase, mitochondrial	IARS2	114 kDa	13	2866162	3960710	4474917	4059262	4170954	3517520	1.03946	0.793765
447	Q96AG4	Leucine-rich repeat-containing protein 59	LRRC59	35 kDa	6	6450724	4684326	5354457	6392170	6124602	5860952	1.11451	0.34629
448	Q9HAB8	Phosphopantothenate--cysteine ligase	PPCS	34 kDa	4	1855513	2475753	2756870	2066794	2642434	1845126	0.924694	0.644563
449	Q13642	Four and a half LIM domains protein 1	FHL1	36 kDa	4	91983.5	38952.3	127152	60733.5	72956.5	58256.2	0.743725	0.481666
450	P39687	Acidic leucine-rich nuclear phosphoprotein 32 family member A	ANP32A	29 kDa	4	3592250	2870363	2300398	4113324	6259310	4647099	1.71399	0.0629862
451	Q01518	Adenylyl cyclase-associated protein 1	CAP1	52 kDa	9	2726321	4090585	4838795	4101775	4120385	5076535	1.14096	0.489281
452	Q6FI81	Anamorsin	CIAPIN1	34 kDa	7	1552319	1769820	1967509	1474374	1591653	1522297	0.867416	0.183703
453	O00299	Chloride intracellular channel protein 1	CLIC1	27 kDa	9	8342810	9693364	13938560	9228635	11150950	10982610	0.980843	0.917841
454	Q9UBG0	C-type mannose receptor 2	MRC2	167 kDa	13	289728	405850	368869	848259	814889	798011	2.31215	0.00176874
455	P11586	C-1-tetrahydrofolate synthase, cytoplasmic	MTHFD1	102 kDa	14	7422393	6475995	8162277	7694618	9350539	8443375	1.15538	0.169987
456	Q8N4Q1	Mitochondrial intermembrane space import and assembly protein 40	CHCHD4	16 kDa	2	410560	572169	475004	533188	602369	466960	1.09932	0.475216
457	Q9UK05	Growth/differentiation factor 2	GDF2	47 kDa	1	490952	564310	356682	317473	464041	237149	0.721461	0.219657
458	Q03252	Lamin-B2	LMNB2	70 kDa	4	720258	964987	1402862	1089087	959000	917110	0.960199	0.858966
459	Q9H2U2	Inorganic pyrophosphatase 2, mitochondrial	PPA2	38 kDa	6	1531984	3464084	2184256	2086919	1988029	2261211	0.882434	0.670363
460	P05156	Complement factor I	CFI	66 kDa	8	6059328	9015066	6048879	4933675	5859794	5453601	0.769155	0.237063
461	P46063	ATP-dependent DNA helicase Q1	RECQL	73 kDa	5	765307	717310	788150	965386	822985	894815	1.18162	0.0593322
462	Q9BY67	Cell adhesion molecule 1	CADM1	49 kDa	2	5949818	7086144	5852740	6493838	6039734	7173396	1.04332	0.62532
463	P14735	Insulin-degrading enzyme	IDE	118 kDa	11	3949758	4310027	4663251	4235796	4555509	4484370	1.02729	0.643033
464	Q01844	RNA-binding protein EWS	EWSR1	68 kDa	2	2445846	3570587	3696985	3355803	3695589	3232987	1.05878	0.687823
465	Q13011	Delta(3,5)-Delta(2,4)-dienoyl-CoA isomerase, mitochondrial	ECH1	36 kDa	4	1518241	1479547	2872484	2330578	2155936	1947968	1.09611	0.724765
466	Q14103	Heterogeneous nuclear ribonucleoprotein D0	HNRNPD	38 kDa	5	13053270	27490450	19601930	26820790	34605380	24193140	1.42353	0.184372
467	Q96KP4	Cytosolic non-specific dipeptidase	CNDP2	53 kDa	11	8977354	11959970	11683430	12431670	11463110	12393070	1.11242	0.327602
468	Q14697	Neutral alpha-glucosidase AB	GANAB	107 kDa	6	1017405	777763	1528155	1492204	1601888	1242188	1.3048	0.266356
469	Q7Z6Z7	E3 ubiquitin-protein ligase HUWE1	HUWE1	482 kDa	20	4685396	4379218	4588197	4570765	4328803	4557325	0.98565	0.614823
470	Q13619	Cullin-4A	CUL4A	88 kDa	10	2554779	1248403	1370966	1031582	1039776	1060262	0.605244	0.243731
471	P46736	Lys-63-specific deubiquitinase BRCC36	BRCC3	36 kDa	3	436528	485927	591494	806096	585140	710808	1.38845	0.0738443
472	P49748	Very long-chain specific acyl-CoA dehydrogenase, mitochondrial	ACADVL	70 kDa	7	4398536	4001119	3828400	3199012	4372986	3804098	0.930328	0.50883
473	P07339	Cathepsin D	CTSD	45 kDa	4	2788966	2881930	2185916	2492097	2147235	2884092	0.957567	0.733883
474	P31431	Syndecan-4	SDC4	22 kDa	2	551474	443059	396262	910578	953530	677211	1.82724	0.0281363
475	Q9Y490	Talin-1	TLN1	270 kDa	55	3587528	2475549	1833868	2074558	1800367	2189630	0.767962	0.355253
476	P37837	Transaldolase	TALDO1	38 kDa	8	23145940	27277700	37280500	26553650	38440560	30753430	1.09171	0.649447
477	Q9P2J5	Leucine--tRNA ligase, cytoplasmic	LARS1	134 kDa	12	2976499	3969892	3667472	4074542	4388661	3881382	1.16306	0.179386
478	Q13347	Eukaryotic translation initiation factor 3 subunit I	EIF3I	37 kDa	7	2803081	3426081	3366719	3705133	3357310	3030002	1.05175	0.583914
479	P42330	Aldo-keto reductase family 1 member C3	AKR1C3	37 kDa	2	89460	111957	121653	21553.8	188837	83635.6	0.910102	0.862534
480	P99999	Cytochrome c	CYCS	12 kDa	2	601730	931523	1296234	1362712	1206102	1269261	1.35646	0.232133
481	P28161	Glutathione S-transferase Mu 2	GSTM2	26 kDa	3	1328102	1199040	1312265	1436696	1586991	1443566	1.16353	0.031819
482	Q9Y5K6	CD2-associated protein	CD2AP	71 kDa	3	1069632	1572270	1524095	1666356	1455103	1541314	1.11925	0.415896
483	P22531	Small proline-rich protein 2E	SPRR2E	8 kDa	3	91253.5	39243.9	83345.7	1429569	21960	1347418	13.0888	0.199321
484	Q9BY44	Eukaryotic translation initiation factor 2A	EIF2A	65 kDa	2	355663	455931	632688	531497	568384	397891	1.03704	0.863367
485	Q9UBQ0	Vacuolar protein sorting-associated protein 29	VPS29	21 kDa	2	232454	196616	425352	468798	469861	374894	1.53736	0.151521
486	P13591	Neural cell adhesion molecule 1	NCAM1	95 kDa	7	2358331	2282831	1728907	1615063	2173321	1471885	0.825779	0.274046
487	Q9H3K6	BolA-like protein 2	BOLA2	10 kDa	2	493118	828679	797762	966816	1031046	1159872	1.48981	0.0637613
488	P30101	Protein disulfide-isomerase A3	PDIA3	57 kDa	9	904877	1251780	1944028	1118533	1054067	1505074	0.896844	0.704989
489	P52565	Rho GDP-dissociation inhibitor 1	ARHGDIA	23 kDa	4	21563690	20385460	25813200	22264740	27056250	21019960	1.03805	0.745629
490	Q04446	1,4-alpha-glucan-branching enzyme	GBE1	80 kDa	6	627875	841996	1563566	1159580	1586520	1179708	1.29418	0.417045
491	Q13126	S-methyl-5'-thioadenosine phosphorylase	MTAP	31 kDa	5	1006986	1466859	1565354	1489272	2089533	1580503	1.27731	0.215883
492	P18124	60S ribosomal protein L7	RPL7	29 kDa	9	2100028	5146185	5220985	2947927	3783903	3025518	0.782642	0.475351
493	Q9Y678	Coatomer subunit gamma-1	COPG1	98 kDa	12	5373126	4481781	4375089	4243905	3860845	8233601	1.14816	0.668445
494	P08758	Annexin A5	ANXA5	36 kDa	6	2196552	3618268	12469390	3323962	3970851	2686919	0.545921	0.480386
495	P08581	Hepatocyte growth factor receptor	MET	156 kDa	4	390874	378681	402856	404511	496835	452575	1.15482	0.143878
496	Q9UKU9	Angiopoietin-related protein 2	ANGPTL2	57 kDa	3	2417110	1903511	2466726	1970639	1977419	1902940	0.862045	0.22359
497	P49589	Cysteine--tRNA ligase, cytoplasmic	CARS1	85 kDa	10	4212042	4368710	5223336	5345751	6049397	5244305	1.2054	0.0821624
498	O14929	Histone acetyltransferase type B catalytic subunit	HAT1	50 kDa	3	1739302	1093846	1736465	1366932	1494233	1909279	1.04395	0.817197
499	Q9UGI8	Testin	TES	48 kDa	9	372457	761737	488414	1582008	1267797	512847	2.07237	0.201393
500	Q15084	Protein disulfide-isomerase A6	PDIA6	48 kDa	4	3049249	4172232	4138734	3563236	3593504	3875471	0.971127	0.798594
501	Q4LDE5	Sushi, von Willebrand factor type A, EGF and pentraxin domain-containing protein 1	SVEP1	390 kDa	6	139253	164823	157598	170173	63585.8	102390	0.728108	0.30989
502	P02771	Alpha-fetoprotein	AFP	69 kDa	7	26094940	26281120	26075240	30611870	32621650	32065300	1.21475	0.0104923
503	P31937	3-hydroxyisobutyrate dehydrogenase, mitochondrial	HIBADH	35 kDa	4	526273	693933	1270920	1069393	1270213	1089409	1.37649	0.29816
504	P52888	Thimet oligopeptidase	THOP1	79 kDa	9	1009798	1398876	1548490	2366653	2385407	1001305	1.45391	0.321445
505	O15145	Actin-related protein 2/3 complex subunit 3	ARPC3	21 kDa	2	1548817	1684256	1642923	2146370	2019234	1743832	1.21194	0.0888134
506	P01266	Thyroglobulin	TG	305 kDa	3	9413499	10980450	9886755	8708853	9039508	8995460	0.883197	0.120036
507	P63220	40S ribosomal protein S21	RPS21	9 kDa	2	9359619	10428990	13268210	11158030	10588270	11091630	0.993378	0.956093
508	O00391	Sulfhydryl oxidase 1	QSOX1	83 kDa	7	1364561	1231874	1031002	1489225	1165986	1656122	1.18853	0.268218
509	Q9H773	dCTP pyrophosphatase 1	DCTPP1	19 kDa	4	1945373	2280852	2647400	2859005	2175429	2381252	1.07886	0.562513
510	P55263	Adenosine kinase	ADK	41 kDa	5	694781	831005	908844	885304	1119764	1114199	1.28121	0.0861664
511	O60610	Protein diaphanous homolog 1	DIAPH1	141 kDa	8	1384926	1222246	1385741	1091448	1337773	1292822	0.932162	0.392827
512	O75891	Cytosolic 10-formyltetrahydrofolate dehydrogenase	ALDH1L1	99 kDa	7	1403727	1145454	1243341	905248	1093773	951294	0.77793	0.0447691
513	P32929	Cystathionine gamma-lyase	CTH	45 kDa	4	2533714	3336547	3702481	3835784	3563694	3636940	1.1529	0.29115
514	Q8NFQ8	Torsin-1A-interacting protein 2	TOR1AIP2	51 kDa	1	22958.9	34387.2	25404.8	38778.5	15655.5	68726.4	1.48833	0.475244
515	P11717	Cation-independent mannose-6-phosphate receptor	IGF2R	274 kDa	5	13355320	11247600	11133100	9168210	11789230	9395594	0.849368	0.181801
516	Q14847	LIM and SH3 domain protein 1	LASP1	30 kDa	3	238058	325309	126447	244654	151194	322500	1.04136	0.906477
517	P12270	Nucleoprotein TPR	TPR	267 kDa	21	4231343	5295169	6433303	4477354	5551301	4880279	0.934155	0.65595
518	Q16658	Fascin	FSCN1	55 kDa	9	5538711	6093393	6495057	7959592	8852877	5638697	1.23854	0.268165
519	Q6E0U4	Dermokine	DMKN	47 kDa	1	618818	1568592	1088033	891191	532324	462060	0.57567	0.229054
520	Q8WXX5	DnaJ homolog subfamily C member 9	DNAJC9	30 kDa	5	1135716	1884719	1949643	2148082	1840644	1826090	1.16996	0.400095
521	P35443	Thrombospondin-4	THBS4	106 kDa	13	7197822	6354941	5142401	4571081	2816167	3341772	0.573893	0.0292359
522	O15355	Protein phosphatase 1G	PPM1G	59 kDa	3	514830	520814	339939	617661	652244	575963	1.34188	0.104753
523	P53041	Serine/threonine-protein phosphatase 5	PPP5C	57 kDa	4	1528667	2167192	2058512	2118944	2160312	2359241	1.15364	0.270999
524	P07384	Calpain-1 catalytic subunit	CAPN1	82 kDa	11	1791397	1145001	1254900	1232712	1334424	1103081	0.875676	0.482254
525	O00468	Agrin	AGRN	217 kDa	7	954873	913140	824756	853179	929267	764281	0.945765	0.472735
526	Q9UHD8	Septin-9	SEPTIN9	65 kDa	9	5002123	4545821	4378881	4720535	4939762	4787009	1.03737	0.455986
527	Q96DI7	U5 small nuclear ribonucleoprotein 40 kDa protein	SNRNP40	39 kDa	4	1614203	1594832	1898243	1726653	1777003	1504167	0.980527	0.810171
528	Q14574	Desmocollin-3	DSC3	100 kDa	3	371003	143935	216619	197624	262464	278400	1.00947	0.976548
529	P04040	Catalase	CAT	60 kDa	11	1458159	842598	1270056	1348214	847976	883108	0.862352	0.537984
530	O95782	AP-2 complex subunit alpha-1	AP2A1	108 kDa	9	5057180	3317545	3636010	4092831	3454426	4794288	1.02754	0.876178
531	O14786	Neuropilin-1	NRP1	103 kDa	8	193392	291204	216129	268071	268074	342497	1.2539	0.201202
532	P49419	Alpha-aminoadipic semialdehyde dehydrogenase	ALDH7A1	58 kDa	4	459638	164733	318842	283460	259952	422694	1.02427	0.943136
533	O43592	Exportin-T	XPOT	110 kDa	12	4227535	3687681	5545976	3937478	4892355	4733089	1.00756	0.960143
534	P04062	Lysosomal acid glucosylceramidase	GBA	60 kDa	4	721563	910678	739672	702215	771935	726165	0.927654	0.447971
535	P23526	Adenosylhomocysteinase	AHCY	48 kDa	12	13539130	12145470	14537890	12399650	13493340	12894830	0.964332	0.577952
536	Q9UNF0	Protein kinase C and casein kinase substrate in neurons protein 2	PACSIN2	56 kDa	4	808150	812793	562122	788911	688965	922552	1.09957	0.53657
537	P23284	Peptidyl-prolyl cis-trans isomerase B	PPIB	24 kDa	6	7990739	7017776	9915629	6767253	6222472	7306710	0.814328	0.204241
538	O00303	Eukaryotic translation initiation factor 3 subunit F	EIF3F	38 kDa	7	5638821	4837153	4129193	4810798	6204680	5064660	1.10099	0.466435
539	P30085	UMP-CMP kinase	CMPK1	22 kDa	4	292524	354441	497348	536562	433141	655051	1.41985	0.143984
540	P10599	Thioredoxin	TXN	12 kDa	2	30212090	49906410	71546360	31261570	46750420	32408910	0.728059	0.374216
541	O75116	Rho-associated protein kinase 2	ROCK2	161 kDa	10	1455893	2059830	2881670	2438157	2842691	2557061	1.22517	0.366016
542	P53634	Dipeptidyl peptidase 1	CTSC	52 kDa	2	552146	1253177	2187880	2002446	1876460	1354858	1.31067	0.485994
543	P56192	Methionine--tRNA ligase, cytoplasmic	MARS1	101 kDa	5	1772885	2425951	2335540	1327788	1740873	1479952	0.696105	0.0625898
544	P32322	Pyrroline-5-carboxylate reductase 1, mitochondrial	PYCR1	33 kDa	5	999743	464649	458519	290617	389214	400134	0.56163	0.255479
545	O95816	BAG family molecular chaperone regulator 2	BAG2	24 kDa	2	882399	1126001	1158664	939998	951756	1612327	1.10641	0.674455
546	Q16822	Phosphoenolpyruvate carboxykinase [GTP], mitochondrial	PCK2	71 kDa	10	6147752	3424829	3612814	3530233	3122319	3564997	0.774914	0.376854
547	Q9UKD2	mRNA turnover protein 4 homolog	MRTO4	28 kDa	8	3033487	4609728	5635868	5203456	6378912	5454607	1.28299	0.236004
548	Q9Y5L4	Mitochondrial import inner membrane translocase subunit Tim13	TIMM13	11 kDa	4	385262	432758	629834	673158	702428	486147	1.28586	0.244272
549	P20810	Calpastatin	CAST	77 kDa	7	1521879	1538466	2237598	1732951	1521281	1493973	0.896236	0.524838
550	O00764	Pyridoxal kinase	PDXK	35 kDa	4	6673398	4807772	5546123	6720575	5811515	5532973	1.06095	0.626964
551	Q8N335	Glycerol-3-phosphate dehydrogenase 1-like protein	GPD1L	38 kDa	1	844999	609699	586869	440374	822585	432524	0.830481	0.499336
552	P35590	Tyrosine-protein kinase receptor Tie-1	TIE1	125 kDa	6	252621	341206	257954	473059	214608	201581	1.04399	0.903482
553	P07711	Cathepsin L1	CTSL	38 kDa	3	1310459	1563672	1559865	1423325	1436638	1491221	0.981323	0.776461
554	P15531	Nucleoside diphosphate kinase A	NME1	17 kDa	5	6948626	10681530	9302390	8217300	12374040	8151110	1.0672	0.751539
555	P00746	Complement factor D	CFD	27 kDa	5	822437	740789	831178	633411	865042	662127	0.902345	0.403082
556	Q9ULA0	Aspartyl aminopeptidase	DNPEP	52 kDa	3	151415	259366	453949	384226	225922	171974	0.904469	0.814285
557	P04350	Tubulin beta-4A chain	TUBB4A	50 kDa	14	530584	748987	430913	551309	460987	481049	0.873054	0.526611
558	Q13045	Protein flightless-1 homolog	FLII	145 kDa	5	750519	903071	1167736	663095	933015	737664	0.827191	0.337
559	P18754	Regulator of chromosome condensation	RCC1	45 kDa	6	2721595	2665027	3504205	3119547	2967633	2848014	1.00499	0.962321
560	Q7KZF4	Staphylococcal nuclease domain-containing protein 1	SND1	102 kDa	7	2216515	2106591	2309659	3236183	2753552	2570211	1.29055	0.0735117
561	P54136	Arginine--tRNA ligase, cytoplasmic	RARS1	75 kDa	11	7115505	5723734	6633745	5424351	5361934	4984322	0.809871	0.0816965
562	Q9NYL9	Tropomodulin-3	TMOD3	40 kDa	2	278469	239274	80195.7	341506	117813	219091	1.13458	0.77733
563	Q96P70	Importin-9	IPO9	116 kDa	8	3820212	3246878	3520046	3220000	3517628	3108957	0.930052	0.301605
564	Q12904	Aminoacyl tRNA synthase complex-interacting multifunctional protein 1	AIMP1	34 kDa	4	4030864	4008911	4678703	5912776	5345070	4898579	1.27031	0.0392
565	Q04756	Hepatocyte growth factor activator	HGFAC	71 kDa	8	413452	412892	245806	365208	214753	353424	0.870574	0.565455
566	P14868	Aspartate--tRNA ligase, cytoplasmic	DARS1	57 kDa	10	2848052	3991632	3428313	3635144	3258868	4049144	1.06575	0.60839
567	Q92499	ATP-dependent RNA helicase DDX1	DDX1	82 kDa	9	3026511	2953860	3583142	3018762	3662852	2409971	0.950653	0.727678
568	P02458	Collagen alpha-1(II) chain	COL2A1	142 kDa	5	15290430	5413297	8712937	9683694	15553110	5684123	1.05114	0.908104
569	A9QM74	Importin subunit alpha-8	KPNA7	57 kDa	1	627297	347322	552749	508769	702373	662541	1.22674	0.329313
570	Q15717	ELAV-like protein 1	ELAVL1	36 kDa	8	2621550	4416926	3108780	3975855	3647910	4403610	1.18528	0.36765
571	P31689	DnaJ homolog subfamily A member 1	DNAJA1	45 kDa	5	585570	716336	737438	618307	800646	412972	0.898291	0.613595
572	Q9BXP5	Serrate RNA effector molecule homolog	SRRT	101 kDa	5	1211003	1625104	1215296	1189042	1247732	1177650	0.892141	0.400231
573	O43399	Tumor protein D54	TPD52L2	22 kDa	3	2672464	2438127	3937790	2933182	2728003	2600288	0.913033	0.632858
574	P12236	ADP/ATP translocase 3	SLC25A6	33 kDa	2	221444	87630.6	1004388	1348911	487577	1125534	2.25512	0.227517
575	Q14008	Cytoskeleton-associated protein 5	CKAP5	226 kDa	14	3026674	2533719	3409431	2658513	4382277	2616612	1.07665	0.744037
576	P17655	Calpain-2 catalytic subunit	CAPN2	80 kDa	7	1332272	1067179	854455	997804	699501	876315	0.790933	0.249395
577	Q8N163	Cell cycle and apoptosis regulator protein 2	CCAR2	103 kDa	2	253393	190090	277173	298176	371154	250393	1.27623	0.209301
578	P05161	Ubiquitin-like protein ISG15	ISG15	18 kDa	2	406226	372057	413460	350376	329550	355530	0.868859	0.0341414
579	Q8NE71	ATP-binding cassette sub-family F member 1	ABCF1	96 kDa	5	756812	932280	727816	1059622	811607	906250	1.14919	0.281635
580	Q8NDA2	Hemicentin-2	HMCN2	542 kDa	5	1072020	973828	1387768	837398	1533943	637104	0.876174	0.67
581	P46926	Glucosamine-6-phosphate isomerase 1	GNPDA1	33 kDa	5	4572241	5018583	5053794	6356728	4776660	5235347	1.11773	0.346278
582	Q13228	Methanethiol oxidase	SELENBP1	52 kDa	9	2425085	2967210	4688963	2769880	2578994	3126103	0.840667	0.517848
583	Q14839	Chromodomain-helicase-DNA-binding protein 4	CHD4	218 kDa	5	484944	323082	358165	535078	453879	527457	1.30031	0.125531
584	Q09666	Neuroblast differentiation-associated protein AHNAK	AHNAK	629 kDa	16	1834690	1799930	2505428	1873763	2123700	1928604	0.96515	0.791337
585	P24752	Acetyl-CoA acetyltransferase, mitochondrial	ACAT1	45 kDa	6	4378660	3091285	4241543	3596117	3317840	3521991	0.891086	0.407686
586	Q8TDN6	Ribosome biogenesis protein BRX1 homolog	BRIX1	41 kDa	5	1451043	1520132	2716034	1573447	2304686	1851329	1.00743	0.977623
587	P55786	Puromycin-sensitive aminopeptidase	NPEPPS	103 kDa	25	4011702	4231961	4889901	4849331	4425057	4312896	1.03455	0.656206
588	O75369	Filamin-B	FLNB	278 kDa	48	6641499	8166204	9031026	7059206	8762497	7462556	0.976741	0.842521
589	Q9Y315	Deoxyribose-phosphate aldolase	DERA	35 kDa	2	446079	288036	458888	413284	470421	429832	1.10104	0.546794
590	Q5SY68	Protein S100-A7-like 2	S100A7L2	11 kDa	1	53243.7	93490.2	30337.8	696526	51827.5	777721	8.6184	0.18858
591	Q5VYK3	Proteasome adapter and scaffold protein ECM29	ECPAS	204 kDa	14	5824860	4646003	5222797	4822083	5449639	5375037	0.997011	0.970664
592	Q99988	Growth/differentiation factor 15	GDF15	34 kDa	3	4145128	4906083	5408313	5353546	5523941	4219156	1.04406	0.719284
593	P06737	Glycogen phosphorylase, liver form	PYGL	97 kDa	15	782196	901164	735470	739569	1135465	939580	1.16363	0.374132
594	Q86SR1	Polypeptide N-acetylgalactosaminyltransferase 10	GALNT10	69 kDa	3	444865	600658	424048	515271	423786	470714	0.959308	0.768731
595	Q16762	Thiosulfate sulfurtransferase	TST	33 kDa	4	1172493	1122700	1897037	1427632	1682018	1448948	1.08739	0.68108
596	P55290	Cadherin-13	CDH13	78 kDa	7	203646	286395	222297	86605.7	200324	100019	0.54321	0.0757875
597	P42126	Enoyl-CoA delta isomerase 1, mitochondrial	ECI1	33 kDa	5	4933150	3175109	3292676	2381777	2694322	2474975	0.662321	0.148841
598	P62140	Serine/threonine-protein phosphatase PP1-beta catalytic subunit	PPP1CB	37 kDa	10	2564689	2767789	3065459	2283320	3376377	2433637	0.963729	0.804262
599	Q15075	Early endosome antigen 1	EEA1	162 kDa	9	1332337	1367501	1521913	1132854	1065659	1020840	0.762563	0.0137321
600	Q9UKV3	Apoptotic chromatin condensation inducer in the nucleus	ACIN1	152 kDa	1	168449	246151	185194	195250	265695	191574	1.08791	0.63006
601	P31150	Rab GDP dissociation inhibitor alpha	GDI1	51 kDa	11	2023313	2488783	3356540	2817967	2848652	3195105	1.12621	0.491235
602	Q92526	T-complex protein 1 subunit zeta-2	CCT6B	58 kDa	3	7647604	3776233	4223656	4731115	4488084	4454143	0.873836	0.644643
603	Q9HC38	Glyoxalase domain-containing protein 4	GLOD4	35 kDa	5	1150744	1637015	1785981	1720283	1686954	1720712	1.12117	0.437155
604	Q96FW1	Ubiquitin thioesterase OTUB1	OTUB1	31 kDa	5	12306.9	64464.8	71574.4	539617	183594	849338	10.6005	0.131035
605	Q07960	Rho GTPase-activating protein 1	ARHGAP1	50 kDa	3	626411	805958	835009	501665	815965	599495	0.845525	0.367872
606	Q9UJ70	N-acetyl-D-glucosamine kinase	NAGK	37 kDa	5	966350	1230100	1216802	1129286	1196658	1286380	1.05832	0.5428
607	Q9Y2W1	Thyroid hormone receptor-associated protein 3	THRAP3	109 kDa	10	983689	1318681	2059538	1726192	2294702	1972486	1.37403	0.22598
608	Q8NCW5	NAD(P)H-hydrate epimerase	NAXE	32 kDa	4	257323	174264	344585	419801	250094	458982	1.45442	0.223896
609	Q92900	Regulator of nonsense transcripts 1	UPF1	124 kDa	5	1274961	1931991	1161520	758850	2429683	1971505	1.1812	0.667269
610	Q9UH65	Switch-associated protein 70	SWAP70	69 kDa	4	1017926	857261	1442125	951049	1307642	957686	0.969573	0.881773
611	P02462	Collagen alpha-1(IV) chain	COL4A1	161 kDa	3	220120	152857	206021	376702	220304	201140	1.3785	0.319732
612	Q99460	26S proteasome non-ATPase regulatory subunit 1	PSMD1	106 kDa	10	5848430	4499803	4489262	4964916	4672025	4064065	0.923404	0.518109
613	O43324	Eukaryotic translation elongation factor 1 epsilon-1	EEF1E1	20 kDa	2	829800	1137773	1493540	1364812	1283268	1333931	1.1505	0.461284
614	P02538	Keratin, type II cytoskeletal 6A	KRT6A	60 kDa	21	4102090	937247	1985213	5958016	3112786	4895816	1.98826	0.138059
615	P07858	Cathepsin B	CTSB	38 kDa	3	858552	509517	699819	851916	1132297	719476	1.30746	0.253361
616	P07954	Fumarate hydratase, mitochondrial	FH	55 kDa	4	2552783	2964451	3585130	2000394	5967699	1335649	1.02212	0.967584
617	Q99848	Probable rRNA-processing protein EBP2	EBNA1BP2	35 kDa	4	927692	1526587	1660465	1584973	1473458	2354115	1.3154	0.294743
618	Q16851	UTP--glucose-1-phosphate uridylyltransferase	UGP2	57 kDa	9	325068	454087	613408	538140	476971	453195	1.05439	0.7955
619	P13804	Electron transfer flavoprotein subunit alpha, mitochondrial	ETFA	35 kDa	6	3046485	2209103	2782689	2824249	2829388	2568395	1.02286	0.832942
620	Q9HAV7	GrpE protein homolog 1, mitochondrial	GRPEL1	24 kDa	1	643420	796989	1118285	728750	808719	816664	0.920053	0.676762
621	Q9UK76	Jupiter microtubule associated homolog 1	JPT1	16 kDa	1	847704	907581	487324	561266	640690	802891	0.89398	0.631362
622	Q00266	S-adenosylmethionine synthase isoform type-1	MAT1A	44 kDa	3	447764	417455	392298	335924	297866	419333	0.837462	0.188921
623	P34896	Serine hydroxymethyltransferase, cytosolic	SHMT1	53 kDa	7	189702	101082	301937	332178	154886	127113	1.0362	0.938197
624	P31040	Succinate dehydrogenase [ubiquinone] flavoprotein subunit, mitochondrial	SDHA	73 kDa	2	106893	132891	83067.1	114779	199837	128504	1.37252	0.271668
625	P04275	von Willebrand factor	VWF	309 kDa	8	276722	237559	993097	459990	637250	845827	1.28904	0.63021
626	Q13835	Plakophilin-1	PKP1	83 kDa	2	414238	76808.2	127134	78853.9	193452	107369	0.614183	0.535222
627	Q9BY43	Charged multivesicular body protein 4a	CHMP4A	25 kDa	1	76942.3	130090	178873	123877	128365	99808.8	0.912273	0.743906
628	P54577	Tyrosine--tRNA ligase, cytoplasmic	YARS1	59 kDa	13	4627482	4331018	3671388	4017261	4574761	4359089	1.02543	0.762862
629	P10145	Interleukin-8	CXCL8	11 kDa	1	133368	85401.5	369046	685356	766803	435458	3.21124	0.0317082
630	Q9NZL4	Hsp70-binding protein 1	HSPBP1	39 kDa	5	1898633	1654623	1598047	2353388	1456564	1739224	1.07724	0.674609
631	P55072	Transitional endoplasmic reticulum ATPase	VCP	89 kDa	18	4110029	4510012	6874131	6814562	6118097	4663942	1.13569	0.551294
632	Q13268	Dehydrogenase/reductase SDR family member 2, mitochondrial	DHRS2	30 kDa	2	613394	136216	99070.3	99768.9	70416.3	142937	0.368952	0.39384
633	Q13885	Tubulin beta-2A chain	TUBB2A	50 kDa	14	1369794	866768	443935	511678	444226	395259	0.504071	0.238319
634	P13798	Acylamino-acid-releasing enzyme	APEH	81 kDa	6	974675	1250987	1365913	1086905	1252510	1232293	0.994469	0.96202
635	P63010	AP-2 complex subunit beta	AP2B1	105 kDa	13	2440658	1938927	2111612	2117453	2242881	2427091	1.04564	0.603543
636	P32969	60S ribosomal protein L9	RPL9	22 kDa	4	403751	345366	444533	340485	573488	829184	1.46036	0.322912
637	Q9BTE3	Mini-chromosome maintenance complex-binding protein	MCMBP	73 kDa	6	291279	451326	710749	726911	663606	837234	1.53283	0.15745
638	Q9UNS2	COP9 signalosome complex subunit 3	COPS3	48 kDa	2	924816	863653	781717	714954	870825	718731	0.896631	0.2536
639	Q9UKK9	ADP-sugar pyrophosphatase	NUDT5	24 kDa	3	1851350	2718173	2345881	2690036	3993136	2516422	1.3303	0.2439
640	P46060	Ran GTPase-activating protein 1	RANGAP1	64 kDa	4	1272269	1576558	2542849	1244491	2207543	1459882	0.911018	0.757589
641	P50502	Hsc70-interacting protein	ST13	41 kDa	7	Missing Value	945734	1141147	1320015	1572501	1255931	-	-
642	O14618	Copper chaperone for superoxide dismutase	CCS	29 kDa	2	55327	207195	115832	81932.7	163339	124282	0.976738	0.956853
643	P26447	Protein S100-A4	S100A4	12 kDa	2	18585980	22521080	30808150	14173090	17614940	14703390	0.646475	0.13366
644	O94888	UBX domain-containing protein 7	UBXN7	55 kDa	2	697363	883977	870297	862991	806360	1019719	1.09685	0.417671
645	P49321	Nuclear autoantigenic sperm protein	NASP	85 kDa	8	6711483	9083025	10365020	7835614	8589589	7948196	0.931722	0.637084
646	P01876	Immunoglobulin heavy constant alpha 1	IGHA1	38 kDa	2	128632	137284	219465	496204	330965	555427	2.84848	0.0318353
647	O43488	Aflatoxin B1 aldehyde reductase member 2	AKR7A2	40 kDa	4	880242	1699135	1172520	1038387	1396244	812457	0.865452	0.600569
648	Q08830	Fibrinogen-like protein 1	FGL1	36 kDa	1	2833116	3227954	3013390	3161788	3425126	2522979	1.0039	0.970447
649	P29144	Tripeptidyl-peptidase 2	TPP2	138 kDa	6	1768041	1625285	2321134	1762327	2298780	1807043	1.02689	0.860684
650	Q3LXA3	Triokinase/FMN cyclase	TKFC	59 kDa	7	715381	623278	563902	555628	727080	527791	0.951611	0.710325
651	P47914	60S ribosomal protein L29	RPL29	18 kDa	1	99284.8	613803	1140863	1274134	865107	1721347	2.08236	0.163554
652	P13010	X-ray repair cross-complementing protein 5	XRCC5	83 kDa	10	13591890	16593350	21415300	16625100	18442210	15838850	0.986543	0.930653
653	P12081	Histidine--tRNA ligase, cytoplasmic	HARS1	57 kDa	9	1385025	1695146	1724342	1318531	1814692	1738491	1.01399	0.911816
654	Q04637	Eukaryotic translation initiation factor 4 gamma 1	EIF4G1	175 kDa	13	4376487	4071340	5697000	4411193	4334786	4706443	0.951049	0.692392
655	P00568	Adenylate kinase isoenzyme 1	AK1	22 kDa	5	5903708	5952844	6575731	5572124	6957397	6296690	1.02137	0.79114
656	Q9Y3D6	Mitochondrial fission 1 protein	FIS1	17 kDa	1	382072	166920	228027	135679	218064	218156	0.736018	0.405571
657	Q08188	Protein-glutamine gamma-glutamyltransferase E	TGM3	77 kDa	3	1585333	797661	645348	631262	813062	412495	0.613147	0.312737
658	O76094	Signal recognition particle subunit SRP72	SRP72	75 kDa	5	2088581	2836256	1518518	1852094	1401381	1644222	0.760116	0.308547
659	O75643	U5 small nuclear ribonucleoprotein 200 kDa helicase	SNRNP200	245 kDa	20	5112872	8018009	9933030	7987520	5696850	5469588	0.830473	0.475644
660	Q12996	Cleavage stimulation factor subunit 3	CSTF3	83 kDa	5	1405078	1720331	2149139	1467193	1786603	1536184	0.908131	0.547133
661	P07237	Protein disulfide-isomerase	P4HB	57 kDa	11	589946	1843073	1734620	623764	678608	843230	0.514824	0.232572
662	Q8TAT6	Nuclear protein localization protein 4 homolog	NPLOC4	68 kDa	4	1395731	1491847	1828364	1264402	1643701	1646912	0.965876	0.783505
663	P29218	Inositol monophosphatase 1	IMPA1	30 kDa	4	772132	1194710	830657	592890	407502	1119321	0.757718	0.427967
664	P00390	Glutathione reductase, mitochondrial	GSR	56 kDa	7	1017733	1128516	1466082	1328850	1638718	1428222	1.21688	0.193735
665	P12268	Inosine-5'-monophosphate dehydrogenase 2	IMPDH2	56 kDa	4	1176379	1464121	1869179	2585544	1401558	1926593	1.31133	0.318042
666	O94776	Metastasis-associated protein MTA2	MTA2	75 kDa	5	1335979	333664	625343	167039	175857	532348	0.381372	0.24878
667	Q13155	Aminoacyl tRNA synthase complex-interacting multifunctional protein 2	AIMP2	35 kDa	3	2420186	1782562	2490915	2878534	2421211	2518841	1.16806	0.242992
668	O43847	Nardilysin	NRDC	132 kDa	7	1519951	2119260	1071068	2010302	2229441	1964608	1.31719	0.238446
669	P05783	Keratin, type I cytoskeletal 18	KRT18	48 kDa	6	1263248	1080596	1151586	1017404	954045	1423991	0.971394	0.847454
670	P15121	Aldo-keto reductase family 1 member B1	AKR1B1	36 kDa	10	4403600	5288615	5835147	6101788	6428043	5981593	1.19218	0.12947
671	O14617	AP-3 complex subunit delta-1	AP3D1	130 kDa	6	1813678	1382384	1146805	1338005	1427642	1230787	0.920229	0.620019
672	Q9BS26	Endoplasmic reticulum resident protein 44	ERP44	47 kDa	2	56811.1	50404.8	146571	71970.2	30123.3	97426.9	0.786174	0.652581
673	O75339	Cartilage intermediate layer protein 1	CILP	133 kDa	4	2057694	1722546	1725222	1260480	1298255	1253218	0.692395	0.0349677
674	Q92598	Heat shock protein 105 kDa	HSPH1	97 kDa	9	4624780	3622339	5177674	4360405	3650643	3880930	0.885822	0.387418
675	P17936	Insulin-like growth factor-binding protein 3	IGFBP3	32 kDa	4	2307565	2952358	2815882	3088713	1927590	2252605	0.900085	0.544885
676	P54289	Voltage-dependent calcium channel subunit alpha-2/delta-1	CACNA2D1	125 kDa	13	2914675	2570053	2062892	1718947	2374057	1431794	0.731992	0.145748
677	Q53H82	Endoribonuclease LACTB2	LACTB2	33 kDa	2	303116	408576	365847	389502	382550	369616	1.05951	0.559521
678	Q96P63	Serpin B12	SERPINB12	46 kDa	2	2027617	1489390	504912	388528	462894	951548	0.448286	0.233629
679	Q9Y2Z0	Protein SGT1 homolog	SUGT1	41 kDa	4	978396	1025953	1134372	1317064	1206971	897567	1.09013	0.54021
680	P22061	Protein-L-isoaspartate(D-aspartate) O-methyltransferase	PCMT1	25 kDa	5	548062	528712	773462	543267	805605	731415	1.12434	0.526805
681	P01034	Cystatin-C	CST3	16 kDa	3	2059692	1791134	2660627	2232635	3973337	1776482	1.22591	0.550425
682	Q15020	Squamous cell carcinoma antigen recognized by T-cells 3	SART3	110 kDa	2	235518	177457	249559	258645	591739	223821	1.62136	0.362344
683	Q9GZL7	Ribosome biogenesis protein WDR12	WDR12	48 kDa	3	507519	591304	1315332	728200	663030	1040364	1.00722	0.984918
684	O15305	Phosphomannomutase 2	PMM2	28 kDa	4	188143	211924	362377	336982	399972	362727	1.44231	0.166264
685	Q9NTK5	Obg-like ATPase 1	OLA1	45 kDa	9	1375186	1436923	2009746	1693825	1897712	1586055	1.07378	0.632507
686	Q9H788	SH2 domain-containing protein 4A	SH2D4A	53 kDa	2	146689	194692	141688	87377	184443	87773.8	0.744394	0.340416
687	Q9H993	Damage-control phosphatase ARMT1	ARMT1	51 kDa	3	570100	668117	692396	663409	589098	715211	1.01922	0.824726
688	Q9UBU9	Nuclear RNA export factor 1	NXF1	70 kDa	3	203891	261845	227893	261670	225193	258630	1.07477	0.451348
689	Q9HAS0	Protein Njmu-R1	C17orf75	45 kDa	1	45507.1	11545.2	17261.7	18232	18421	6858.57	0.585511	0.437342
690	P29279	CCN family member 2	CCN2	38 kDa	5	906424	1293129	1309580	1431410	1603775	814152	1.09695	0.705398
691	P49407	Beta-arrestin-1	ARRB1	47 kDa	4	700857	783543	594549	687872	455236	904784	0.985061	0.94653
692	P49792	E3 SUMO-protein ligase RanBP2	RANBP2	358 kDa	5	394107	374609	529092	503710	576600	505378	1.22182	0.177116
693	Q96DB5	Regulator of microtubule dynamics protein 1	RMDN1	36 kDa	2	672193	820385	847842	706788	861861	557654	0.908513	0.53487
694	Q8N1N4	Keratin, type II cytoskeletal 78	KRT78	57 kDa	7	3252541	2071112	1913317	1514069	1591856	1318864	0.611415	0.15245
695	Q9UHB9	Signal recognition particle subunit SRP68	SRP68	71 kDa	7	2059151	1707632	1453109	1732694	2002400	1309335	0.966386	0.837816
696	Q99798	Aconitate hydratase, mitochondrial	ACO2	85 kDa	6	1677890	1839230	1911612	1693721	1813359	1735380	0.965688	0.482059
697	Q9NTM9	Copper homeostasis protein cutC homolog	CUTC	29 kDa	2	422717	422974	738700	482151	526794	530654	0.971728	0.900805
698	P54652	Heat shock-related 70 kDa protein 2	HSPA2	70 kDa	8	885625	472366	497387	420787	485502	424204	0.717101	0.320315
699	P32754	4-hydroxyphenylpyruvate dioxygenase	HPD	45 kDa	11	1631406	2554280	3182616	2444590	2293627	2590312	0.994602	0.979402
700	Q92522	Histone H1.10	H1-10	22 kDa	3	1058115	2111528	2341412	1607419	1592854	1497640	0.852453	0.563932
701	Q13596	Sorting nexin-1	SNX1	59 kDa	8	689175	927953	468888	539504	778874	617101	0.927835	0.759902
702	P13987	CD59 glycoprotein	CD59	14 kDa	1	110135	122212	342852	233780	323718	270323	1.43919	0.384566
703	Q16831	Uridine phosphorylase 1	UPP1	34 kDa	3	754996	783140	977686	655323	785789	773956	0.880455	0.299862
704	Q9NPE3	H/ACA ribonucleoprotein complex subunit 3	NOP10	8 kDa	1	56283.3	20004.5	31022.3	83909.3	28388.6	57980.3	1.58679	0.346128
705	O95551	Tyrosyl-DNA phosphodiesterase 2	TDP2	41 kDa	1	510383	677425	353577	378865	229372	350374	0.621915	0.161841
706	Q9UJU6	Drebrin-like protein	DBNL	48 kDa	4	253041	282041	360026	396110	419645	489723	1.45846	0.0332014
707	P53004	Biliverdin reductase A	BLVRA	33 kDa	4	2392841	3530602	3592916	4276282	3480401	3966272	1.23187	0.196262
708	P46013	Proliferation marker protein Ki-67	MKI67	359 kDa	10	1684810	2900720	2661080	2708181	1985924	2464974	0.987921	0.94973
709	Q9BZK7	F-box-like/WD repeat-containing protein TBL1XR1	TBL1XR1	56 kDa	1	17751.7	43380.9	Missing Value	86968.9	36413	135576	-	-
710	P27708	CAD protein	CAD	243 kDa	4	75246	196589	181891	325870	208351	394862	2.04768	0.0833057
711	Q9H832	Ubiquitin-conjugating enzyme E2 Z	UBE2Z	38 kDa	3	583169	652270	733086	582678	615049	422985	0.823313	0.196328
712	Q96FQ6	Protein S100-A16	S100A16	12 kDa	1	369718	347870	321920	272516	314806	288691	0.842717	0.0428914
713	O43447	Peptidyl-prolyl cis-trans isomerase H	PPIH	19 kDa	3	1442433	1417346	1590357	1404663	1287727	1540020	0.951074	0.472012
714	Q16819	Meprin A subunit alpha	MEP1A	84 kDa	1	374798	267538	272772	424832	329592	348853	1.20562	0.241738
715	P05089	Arginase-1	ARG1	35 kDa	8	827711	188256	438596	409062	557138	256263	0.840433	0.732753
716	Q53FA7	Quinone oxidoreductase PIG3	TP53I3	36 kDa	2	200170	447269	608913	506149	708808	566059	1.41761	0.281654
717	Q15493	Regucalcin	RGN	33 kDa	3	16099110	8809322	13252050	29538630	11210500	5257415	1.20561	0.759572
718	Q9HBI1	Beta-parvin	PARVB	42 kDa	3	11901050	2521489	832343	8420822	13586320	6482838	1.8676	0.347868
719	Q9UNP9	Peptidyl-prolyl cis-trans isomerase E	PPIE	33 kDa	3	397607	504871	758782	516911	599181	417995	0.923448	0.746389
720	O75663	TIP41-like protein	TIPRL	31 kDa	2	244076	177555	466404	253717	327207	354077	1.05289	0.878298
721	Q15691	Microtubule-associated protein RP/EB family member 1	MAPRE1	30 kDa	3	18202	174766	8135.48	29483.9	130965	19260.8	0.893619	0.918265
722	Q9NPJ3	Acyl-coenzyme A thioesterase 13	ACOT13	15 kDa	1	3170239	1972124	2158017	1707306	2060585	1763469	0.757681	0.250022
723	O43143	Pre-mRNA-splicing factor ATP-dependent RNA helicase DHX15	DHX15	91 kDa	13	10419870	9950200	10678100	8194847	8833565	9075887	0.840768	0.00912563
724	P27694	Replication protein A 70 kDa DNA-binding subunit	RPA1	68 kDa	7	1929769	2612398	2655668	2212445	2586492	2124292	0.961849	0.758942
725	O96019	Actin-like protein 6A	ACTL6A	47 kDa	3	1433404	1010646	1964043	1802951	1232311	2249024	1.19877	0.509188
726	O94973	AP-2 complex subunit alpha-2	AP2A2	104 kDa	8	1687923	1023821	1146895	969659	1200912	1152734	0.861263	0.480521
727	Q06265	Exosome complex component RRP45	EXOSC9	49 kDa	3	506940	782129	548364	511340	505540	450143	0.798409	0.284158
728	P02786	Transferrin receptor protein 1	TFRC	85 kDa	8	3534239	3384799	4736125	3170879	2717278	4168157	0.862821	0.428434
729	Q00796	Sorbitol dehydrogenase	SORD	38 kDa	3	857207	896197	941005	868725	846564	787416	0.928851	0.135746
730	Q9NQ88	Fructose-2,6-bisphosphatase TIGAR	TIGAR	30 kDa	2	163385	222244	201368	243498	283492	178323	1.20156	0.340163
731	O75348	V-type proton ATPase subunit G 1	ATP6V1G1	14 kDa	2	275489	361580	613314	464317	502804	625287	1.27354	0.388047
732	P48960	Adhesion G protein-coupled receptor E5	ADGRE5	92 kDa	1	1223815	757935	1051564	993786	1243303	1013976	1.07179	0.674684
733	P52306	Rap1 GTPase-GDP dissociation stimulator 1	RAP1GDS1	66 kDa	4	501003	603813	320576	476239	446308	442344	0.957555	0.830949
734	O95747	Serine/threonine-protein kinase OSR1	OXSR1	58 kDa	4	989563	1200120	1239244	1016602	968120	914391	0.845487	0.138237
735	Q15637	Splicing factor 1	SF1	68 kDa	4	893633	1190943	1354163	1223886	1266292	1380331	1.12556	0.401385
736	Q9UNZ2	NSFL1 cofactor p47	NSFL1C	41 kDa	3	135576	221898	151712	63531.5	186663	49419.7	0.588418	0.25659
737	O60763	General vesicular transport factor p115	USO1	108 kDa	16	1310295	479450	649027	481350	475781	665809	0.665474	0.396655
738	P37235	Hippocalcin-like protein 1	HPCAL1	22 kDa	4	1540679	1859037	1813819	1473473	1914653	1649732	0.966304	0.737494
739	Q9BR76	Coronin-1B	CORO1B	54 kDa	3	592847	513600	660360	561065	690253	565376	1.02824	0.795215
740	P18615	Negative elongation factor E	NELFE	43 kDa	1	61159.7	43895.8	54080.1	106403	56497.4	21548.3	1.15907	0.766791
741	O00151	PDZ and LIM domain protein 1	PDLIM1	36 kDa	7	79469.7	185734	239407	82944.1	307809	66632.3	0.906412	0.872642
742	Q13308	Inactive tyrosine-protein kinase 7	PTK7	118 kDa	4	383628	155138	92590.9	182050	103967	170530	0.72312	0.582715
743	P07311	Acylphosphatase-1	ACYP1	11 kDa	2	421179	583026	581657	449198	854405	530833	1.15674	0.58643
744	Q14568	Heat shock protein HSP 90-alpha A2	HSP90AA2P	39 kDa	7	1754682	845832	271087	1317504	42436.4	682140	0.711129	0.652167
745	Q8TDD1	ATP-dependent RNA helicase DDX54	DDX54	99 kDa	1	10985.3	95539.4	134161	2979.46	Missing Value	72215.5	-	-
746	Q5JS54	Proteasome assembly chaperone 4	PSMG4	14 kDa	3	403181	753055	823711	962246	1141622	764973	1.44895	0.157614
747	P36873	Serine/threonine-protein phosphatase PP1-gamma catalytic subunit	PPP1CC	37 kDa	10	609638	1519240	1597042	1197094	1163792	1650585	1.07664	0.805714
748	P22352	Glutathione peroxidase 3	GPX3	26 kDa	2	442708	Missing Value	679996	338661	7366.09	505409	-	-
749	O60925	Prefoldin subunit 1	PFDN1	14 kDa	2	714511	248575	543974	1439203	893986	204431	1.68382	0.445051
750	Q04721	Neurogenic locus notch homolog protein 2	NOTCH2	265 kDa	5	1410275	1609683	1370402	1347771	1284195	1105982	0.851399	0.103585
751	Q9NX58	Cell growth-regulating nucleolar protein	LYAR	44 kDa	3	486412	590386	603231	608665	633605	667775	1.13691	0.162359
752	O00584	Ribonuclease T2	RNASET2	29 kDa	1	205255	231218	169429	231579	80073.7	257995	0.940166	0.851889
753	Q6NVY1	3-hydroxyisobutyryl-CoA hydrolase, mitochondrial	HIBCH	43 kDa	2	125350	162285	314825	327016	243190	129424	1.16129	0.711337
754	Q69YN2	CWF19-like protein 1	CWF19L1	61 kDa	3	369667	522264	464092	381750	385278	456521	0.902308	0.44594
755	Q13451	Peptidyl-prolyl cis-trans isomerase FKBP5	FKBP5	51 kDa	4	264675	431363	418508	396843	314219	345913	0.948346	0.766836
756	Q7Z2W4	Zinc finger CCCH-type antiviral protein 1	ZC3HAV1	101 kDa	2	256237	295471	362738	340018	192396	257916	0.864273	0.481149
757	Q12792	Twinfilin-1	TWF1	40 kDa	3	173319	151322	119116	186813	332563	350483	1.96022	0.10087
758	Q5RKV6	Exosome complex component MTR3	EXOSC6	28 kDa	2	386782	546445	430906	593396	321860	336012	0.917263	0.73191
759	Q9NVS9	Pyridoxine-5'-phosphate oxidase	PNPO	30 kDa	4	105814	163116	681428	289839	254156	176837	0.758484	0.718622
760	Q9BTY2	Plasma alpha-L-fucosidase	FUCA2	54 kDa	2	678194	523872	600596	447995	669620	402886	0.843475	0.387761
761	Q9C0C2	182 kDa tankyrase-1-binding protein	TNKS1BP1	182 kDa	6	1045530	2291165	1666911	1508414	1170403	1202870	0.775778	0.410191
762	Q15050	Ribosome biogenesis regulatory protein homolog	RRS1	41 kDa	1	450036	690728	1022484	905158	877407	931663	1.2547	0.383683
763	P40261	Nicotinamide N-methyltransferase	NNMT	30 kDa	2	279515	296211	614306	575310	496183	481547	1.30504	0.383325
764	P35579	Myosin-9	MYH9	227 kDa	40	1338687	1160238	1759694	1232427	1507161	1133551	0.909482	0.579358
765	P06865	Beta-hexosaminidase subunit alpha	HEXA	61 kDa	5	264597	426375	1078266	530304	435273	882314	1.04446	0.93196
766	Q15642	Cdc42-interacting protein 4	TRIP10	68 kDa	5	586835	654446	781394	555686	936554	950999	1.20792	0.40067
767	Q9Y4E8	Ubiquitin carboxyl-terminal hydrolase 15	USP15	112 kDa	6	1538845	2168259	2831098	1934257	2739776	1999191	1.02065	0.926327
768	Q5JSH3	WD repeat-containing protein 44	WDR44	101 kDa	3	310278	299960	367788	337953	301160	440462	1.10383	0.52171
769	P00492	Hypoxanthine-guanine phosphoribosyltransferase	HPRT1	25 kDa	7	1407482	2186953	2451936	2965933	2961501	2893989	1.45896	0.0974065
770	P12111	Collagen alpha-3(VI) chain	COL6A3	344 kDa	8	Missing Value	Missing Value	Missing Value	Missing Value	Missing Value	Missing Value	-	-
771	Q8N584	Tetratricopeptide repeat protein 39C	TTC39C	66 kDa	2	646278	766734	705541	538292	562078	613908	0.809174	0.0391776
772	P35269	General transcription factor IIF subunit 1	GTF2F1	58 kDa	1	12451.4	Missing Value	21470.3	20949.1	41989.3	5897.13	-	-
773	Q9UBB4	Ataxin-10	ATXN10	53 kDa	3	323543	280973	425613	418111	305196	450734	1.1397	0.479192
774	Q99536	Synaptic vesicle membrane protein VAT-1 homolog	VAT1	42 kDa	4	40999.1	39812.7	19883.6	145072	84800.2	114557	3.42051	0.0298761
775	P15586	N-acetylglucosamine-6-sulfatase	GNS	62 kDa	5	259013	397463	351275	369310	372085	273092	1.00668	0.967794
776	P48426	Phosphatidylinositol 5-phosphate 4-kinase type-2 alpha	PIP4K2A	46 kDa	7	2427712	2136110	1992380	1739157	1515601	2109237	0.818156	0.14479
777	P10606	Cytochrome c oxidase subunit 5B, mitochondrial	COX5B	14 kDa	2	734360	837112	1171934	1016032	794184	937948	1.00173	0.992097
778	Q93083	Metallothionein-1L	MT1L	6 kDa	1	30977.8	Missing Value	15098.1	30668.1	Missing Value	28675.3	-	-
779	Q9H853	Putative tubulin-like protein alpha-4B	TUBA4B	28 kDa	2	1198262	1247164	1028721	884106	592825	740613	0.638299	0.0191988
780	P07942	Laminin subunit beta-1	LAMB1	198 kDa	8	Missing Value	Missing Value	Missing Value	Missing Value	46947.9	Missing Value	-	-
781	Q4KMP7	TBC1 domain family member 10B	TBC1D10B	87 kDa	1	54822.6	145479	62162.7	65327.5	141390	85431	1.1131	0.80267
782	Q96RP9	Elongation factor G, mitochondrial	GFM1	83 kDa	3	223686	198116	360049	141044	212203	348011	0.89692	0.750932
783	Q6V0I7	Protocadherin Fat 4	FAT4	543 kDa	16	1093946	1145205	1026070	1264322	1032506	1132015	1.05011	0.522417
784	Q9NTZ6	RNA-binding protein 12	RBM12	97 kDa	4	337968	226687	221379	360429	290308	435183	1.38152	0.15233
785	P46109	Crk-like protein	CRKL	34 kDa	4	345200	661202	697785	571006	654937	612894	1.07901	0.73005
786	P48507	Glutamate--cysteine ligase regulatory subunit	GCLM	31 kDa	4	107332	141000	70245.5	313002	157614	42872.4	1.61181	0.497313
787	O00115	Deoxyribonuclease-2-alpha	DNASE2	40 kDa	1	451112	453481	408490	530092	413355	560318	1.14522	0.289744
788	O43708	Maleylacetoacetate isomerase	GSTZ1	24 kDa	1	51110.4	39206.2	83912.1	53303.1	110585	136328	1.72311	0.227267
789	P50748	Kinetochore-associated protein 1	KNTC1	251 kDa	1	14820.5	16101.4	12125.2	9919.73	29763.1	36429.6	1.76812	0.299566
790	P98179	RNA-binding protein 3	RBM3	17 kDa	1	153271	35977	196469	14957.8	11971.7	52653.1	0.206324	0.159754
791	Q8NBJ4	Golgi membrane protein 1	GOLM1	45 kDa	4	445487	342944	75211.2	301798	189829	161442	0.75618	0.601034
792	P51572	B-cell receptor-associated protein 31	BCAP31	28 kDa	1	1398433	1202848	1519840	1337873	1795201	1399398	1.09982	0.473402
793	Q5T749	Keratinocyte proline-rich protein	KPRP	64 kDa	5	70214.2	484402	3315422	4054447	983547	2893134	2.04937	0.375808
794	O00244	Copper transport protein ATOX1	ATOX1	7 kDa	1	1060858	1083725	916931	834562	854158	659352	0.766964	0.044061
795	P28799	Progranulin	GRN	64 kDa	6	2553896	2266694	2489674	2343446	2592898	2167523	0.971766	0.674818
796	Q9H3H3	UPF0696 protein C11orf68	C11orf68	31 kDa	1	Missing Value	85494.8	149888	Missing Value	268091	168475	-	-
797	P78346	Ribonuclease P protein subunit p30	RPP30	29 kDa	2	500136	1502062	1859517	360877	2134043	1277522	0.976883	0.965991
798	O15514	DNA-directed RNA polymerase II subunit RPB4	POLR2D	16 kDa	2	8878.51	13468.2	39264.9	16604.1	43515.4	43843	1.68738	0.341085
799	P13716	Delta-aminolevulinic acid dehydratase	ALAD	36 kDa	4	Missing Value	339936	Missing Value	Missing Value	318106	233534	-	-
800	Q9Y6G9	Cytoplasmic dynein 1 light intermediate chain 1	DYNC1LI1	57 kDa	2	363357	427468	301126	240055	380398	267386	0.813076	0.295418
801	Q8TEQ6	Gem-associated protein 5	GEMIN5	169 kDa	3	361206	413556	484976	395856	472055	459223	1.0535	0.63237
802	Q8NCM8	Cytoplasmic dynein 2 heavy chain 1	DYNC2H1	493 kDa	1	145855	136254	212374	171180	187856	98897.2	0.926088	0.75435
803	Q9Y221	60S ribosome subunit biogenesis protein NIP7 homolog	NIP7	20 kDa	2	348851	374646	463681	346891	449892	477229	1.07314	0.612988
804	Q8IWX8	Calcium homeostasis endoplasmic reticulum protein	CHERP	104 kDa	2	210478	174017	203290	199261	252848	380975	1.41733	0.266329
805	P37840	Alpha-synuclein	SNCA	14 kDa	1	460071	30556.2	35275.2	42896.9	75089.5	60816	0.339992	0.501991
806	P54920	Alpha-soluble NSF attachment protein	NAPA	33 kDa	9	Missing Value	Missing Value	Missing Value	Missing Value	Missing Value	Missing Value	-	-
807	Q9BQ52	Zinc phosphodiesterase ELAC protein 2	ELAC2	92 kDa	2	118806	145274	183515	263527	204434	316694	1.75304	0.0530467
808	Q13868	Exosome complex component RRP4	EXOSC2	33 kDa	4	1006608	1301625	1953316	1856151	1699238	1582576	1.20566	0.408022
809	P48163	NADP-dependent malic enzyme	ME1	64 kDa	4	13749.8	83879.2	48293.5	55469.5	67298.8	47250.1	1.16513	0.735023
810	Q5H9R7	Serine/threonine-protein phosphatase 6 regulatory subunit 3	PPP6R3	98 kDa	3	108414	57437.2	90110.6	106189	91093.6	137952	1.3097	0.263746
811	P49591	Serine--tRNA ligase, cytoplasmic	SARS1	59 kDa	8	2544911	2336378	2748393	2198668	1954833	2401959	0.859205	0.111606
812	P08670	Vimentin	VIM	54 kDa	15	7802279	9248598	10323850	8562705	8015061	7778483	0.889735	0.300745
813	P35754	Glutaredoxin-1	GLRX	12 kDa	1	1577500	978787	1236977	706185	690239	508081	0.502075	0.0544958
814	Q15847	Adipogenesis regulatory factor	ADIRF	8 kDa	1	262731	349216	510908	465892	374766	501062	1.19492	0.438637
815	Q96TA1	Protein Niban 2	NIBAN2	84 kDa	4	4666390	2908479	3162830	2519878	3003890	3400900	0.831153	0.395418
816	O95479	GDH/6PGL endoplasmic bifunctional protein	H6PD	89 kDa	3	68111.8	86066.9	120220	67775.1	147130	311577	1.91868	0.362363
817	P14314	Glucosidase 2 subunit beta	PRKCSH	59 kDa	4	483387	857954	1187509	1229555	683923	937676	1.12745	0.699019
818	Q16706	Alpha-mannosidase 2	MAN2A1	131 kDa	4	10062.9	129560	79659.4	139434	64298.6	196023	1.82302	0.308502
819	P00450	Ceruloplasmin	CP	122 kDa	7	10564680	13006370	12097230	16627450	14896750	14594980	1.293	0.0222017
820	Q99747	Gamma-soluble NSF attachment protein	NAPG	35 kDa	1	33048.7	75494.5	112056	138026	118221	133568	1.76707	0.124134
821	Q9H3N1	Thioredoxin-related transmembrane protein 1	TMX1	32 kDa	1	167705	273387	287732	336397	409510	128079	1.19917	0.639479
822	Q8WZ42	Titin	TTN	3816 kDa	1	914960	1334616	1050557	449557	1166448	887095	0.758485	0.347739
823	Q1KMD3	Heterogeneous nuclear ribonucleoprotein U-like protein 2	HNRNPUL2	85 kDa	3	291509	318529	310152	670076	362631	279776	1.42632	0.385539
824	Q96GM8	Target of EGR1 protein 1	TOE1	57 kDa	3	292416	296953	439686	557056	430713	521188	1.46635	0.0629441
825	O15511	Actin-related protein 2/3 complex subunit 5	ARPC5	16 kDa	3	577699	729336	581044	1053613	640226	803033	1.32244	0.227843
826	P35573	Glycogen debranching enzyme	AGL	175 kDa	10	69814.3	189879	264330	167049	239900	152212	1.06705	0.86447
827	A6NDG6	Glycerol-3-phosphate phosphatase	PGP	34 kDa	3	4315539	3529086	4259679	3122209	3799423	3258900	0.841067	0.124265
828	Q8WVV9	Heterogeneous nuclear ribonucleoprotein L-like	HNRNPLL	60 kDa	1	33926.3	11698.2	4487.97	7871.23	39191.3	12957.2	1.1977	0.81404
829	P25311	Zinc-alpha-2-glycoprotein	AZGP1	34 kDa	3	442834	282531	654567	415950	162735	278948	0.621504	0.261116
830	O60271	C-Jun-amino-terminal kinase-interacting protein 4	SPAG9	146 kDa	1	284268	263677	279048	286011	204531	160679	0.787457	0.249701
831	P78527	DNA-dependent protein kinase catalytic subunit	PRKDC	469 kDa	6	681499	853668	823270	739447	576465	835144	0.912069	0.499931
832	P23142	Fibulin-1	FBLN1	77 kDa	12	1492571	1547953	1019729	795662	1149400	952031	0.713525	0.134227
833	Q03167	Transforming growth factor beta receptor type 3	TGFBR3	94 kDa	3	7055145	7859437	5839088	7031420	6305428	6393932	0.950713	0.631449
834	P02753	Retinol-binding protein 4	RBP4	23 kDa	3	110668600	64201290	74985470	23778740	33469090	22016250	0.31724	0.0484937
835	Q92466	DNA damage-binding protein 2	DDB2	48 kDa	2	37103.2	49319.2	103110	82254.4	41348.8	80737.5	1.07813	0.850375
836	Q9NVP1	ATP-dependent RNA helicase DDX18	DDX18	75 kDa	7	512982	932510	796829	520723	1420315	1044447	1.33143	0.456791
837	P00751	Complement factor B	CFB	86 kDa	5	398341	439440	451382	545617	579586	665348	1.38892	0.0273018
838	P84085	ADP-ribosylation factor 5	ARF5	21 kDa	5	600926	211829	368180	355934	901983	461188	1.45572	0.430868
839	Q16666	Gamma-interferon-inducible protein 16	IFI16	88 kDa	1	5406.36	Missing Value	113863	15822.8	5104.4	21439.4	-	-
840	Q9BRK5	45 kDa calcium-binding protein	SDF4	42 kDa	2	274467	200761	177852	441036	153746	275067	1.33192	0.48394
841	P29622	Kallistatin	SERPINA4	49 kDa	1	3106405	4116835	2660975	1573814	1828339	1807603	0.527078	0.063954
842	Q9Y3B8	Oligoribonuclease, mitochondrial	REXO2	27 kDa	4	278589	572277	619742	461186	706577	750890	1.30467	0.346653
843	P15151	Poliovirus receptor	PVR	45 kDa	1	156166	256111	395512	270067	214219	249618	0.908534	0.759788
844	P55809	Succinyl-CoA:3-ketoacid coenzyme A transferase 1, mitochondrial	OXCT1	56 kDa	4	2619412	2704648	3291939	2960603	3265491	2682644	1.03398	0.737154
845	P05023	Sodium/potassium-transporting ATPase subunit alpha-1	ATP1A1	113 kDa	5	1677895	1529199	1674132	1109572	1226444	1552779	0.796684	0.117157
846	Q86TU7	Actin-histidine N-methyltransferase	SETD3	67 kDa	3	343659	312495	534188	420377	544457	473448	1.20829	0.367318
847	O14737	Programmed cell death protein 5	PDCD5	14 kDa	2	1956748	2247486	2761539	2273097	2532026	2512072	1.05045	0.67673
848	Q8TCS8	Polyribonucleotide nucleotidyltransferase 1, mitochondrial	PNPT1	86 kDa	2	304089	297245	448286	160387	464092	281639	0.863282	0.667037
849	P80511	Protein S100-A12	S100A12	11 kDa	1	734888	1049566	884519	1227067	1112830	1697880	1.51286	0.108684
850	Q8NDH3	Probable aminopeptidase NPEPL1	NPEPL1	56 kDa	4	422581	683692	353646	508588	415864	540998	1.00379	0.987543
851	O60936	Nucleolar protein 3	NOL3	23 kDa	3	807739	859890	889863	1176300	923840	1364483	1.3547	0.136994
852	Q14676	Mediator of DNA damage checkpoint protein 1	MDC1	227 kDa	1	28058.7	45259.9	65115.7	27812.4	32923	44485.8	0.760081	0.421088
853	Q9NX24	H/ACA ribonucleoprotein complex subunit 2	NHP2	17 kDa	2	410205	374302	874683	687198	595139	737837	1.21757	0.537049
854	P28072	Proteasome subunit beta type-6	PSMB6	25 kDa	2	1677214	2201587	3343515	2719752	3013854	2578606	1.15091	0.541151
855	Q5JVF3	PCI domain-containing protein 2	PCID2	46 kDa	2	33695.4	408662	245019	97792.3	136523	42296.8	0.402418	0.33369
856	Q9UFN0	Protein NipSnap homolog 3A	NIPSNAP3A	28 kDa	1	96361.1	59234.4	61472.3	32123.7	107797	101856	1.11383	0.781575
857	Q9NWV4	CXXC motif containing zinc binding protein	CZIB	18 kDa	4	323984	496417	524200	521759	542202	485206	1.15214	0.391206
858	P20774	Mimecan	OGN	34 kDa	4	15306550	13284590	14307020	12939130	12560450	9506052	0.816017	0.120776
859	Q8WUM4	Programmed cell death 6-interacting protein	PDCD6IP	96 kDa	10	Missing Value	Missing Value	26772	25014.9	23898.2	13720.9	-	-
860	O95498	Vascular non-inflammatory molecule 2	VNN2	59 kDa	1	Missing Value	Missing Value	Missing Value	Missing Value	Missing Value	Missing Value	-	-
861	A4FU69	EF-hand calcium-binding domain-containing protein 5	EFCAB5	173 kDa	1	2097314	2829811	3248105	2530206	2655313	3090643	1.01235	0.934547
862	Q9P287	BRCA2 and CDKN1A-interacting protein	BCCIP	36 kDa	4	1182952	1083819	770629	1820303	1754100	2169011	1.8909	0.00729493
863	Q06203	Amidophosphoribosyltransferase	PPAT	57 kDa	3	1573675	1535188	1860816	1516523	1272057	1268782	0.816423	0.084975
864	Q13618	Cullin-3	CUL3	89 kDa	4	2045276	1087141	934149	1768695	1874722	1041571	1.15207	0.66225
865	Q9NTX5	Ethylmalonyl-CoA decarboxylase	ECHDC1	34 kDa	3	2897756	1168684	1704588	1222284	1229338	1367543	0.661782	0.330669
866	O75818	Ribonuclease P protein subunit p40	RPP40	42 kDa	1	199521	369616	318121	301038	413318	294869	1.13746	0.55844
867	P00966	Argininosuccinate synthase	ASS1	47 kDa	6	567814	552940	788480	825145	891820	1064122	1.45665	0.0496844
868	Q9C0B1	Alpha-ketoglutarate-dependent dioxygenase FTO	FTO	58 kDa	4	831467	907676	1216425	987474	1275683	951245	1.08757	0.610548
869	Q9NRV9	Heme-binding protein 1	HEBP1	21 kDa	4	269749	257450	344696	549673	452846	405454	1.61484	0.0311364
870	P20674	Cytochrome c oxidase subunit 5A, mitochondrial	COX5A	17 kDa	1	378287	364430	497555	614613	381050	637586	1.31685	0.250705
871	Q96KR1	Zinc finger RNA-binding protein	ZFR	117 kDa	3	550628	634859	862914	860327	859834	792243	1.22652	0.235368
872	Q7Z794	Keratin, type II cytoskeletal 1b	KRT77	62 kDa	7	44838140	15135310	24304380	13275030	21839060	15406420	0.599452	0.327997
873	Q13564	NEDD8-activating enzyme E1 regulatory subunit	NAE1	60 kDa	3	184368	100764	312170	212004	373613	312802	1.50413	0.269077
874	Q13162	Peroxiredoxin-4	PRDX4	31 kDa	4	234180	842085	1051069	445404	658076	697941	0.846798	0.707619
875	Q5TFE4	5'-nucleotidase domain-containing protein 1	NT5DC1	52 kDa	5	626021	1002957	1668438	1189100	580796	1257484	0.918107	0.822427
876	Q15061	WD repeat-containing protein 43	WDR43	75 kDa	1	129260	294395	33680.3	173396	116122	233230	1.14303	0.811859
877	Q16595	Frataxin, mitochondrial	FXN	23 kDa	2	251916	333444	387247	430936	310282	525070	1.30195	0.265922
878	Q92696	Geranylgeranyl transferase type-2 subunit alpha	RABGGTA	65 kDa	3	340574	316269	348866	254725	313549	311207	0.874489	0.147161
879	Q96GD0	Pyridoxal phosphate phosphatase	PDXP	32 kDa	1	136877	165361	156565	96974.4	127386	82211.7	0.668199	0.040893
880	P08729	Keratin, type II cytoskeletal 7	KRT7	51 kDa	9	35201470	22958920	16740440	14490340	7072938	8331486	0.399125	0.0936153
881	Q7Z417	Nuclear fragile X mental retardation-interacting protein 2	NUFIP2	76 kDa	2	457987	573654	550831	441942	563237	544825	0.979482	0.844524
882	Q9NPR2	Semaphorin-4B	SEMA4B	93 kDa	4	420230	319610	531300	537715	456353	437498	1.12621	0.492403
883	P18085	ADP-ribosylation factor 4	ARF4	21 kDa	5	1766320	1868050	1546513	1591192	1425369	1442421	0.860661	0.109726
884	P19784	Casein kinase II subunit alpha'	CSNK2A2	41 kDa	4	1277637	2104393	1646611	1514031	1731488	2277364	1.09829	0.643642
885	Q9HB07	UPF0160 protein MYG1, mitochondrial	C12orf10	42 kDa	2	593439	827436	1003622	791581	711390	768831	0.93702	0.712563
886	P62191	26S proteasome regulatory subunit 4	PSMC1	49 kDa	5	2548070	2342582	2677618	2228249	2056388	2611426	0.911181	0.319038
887	Q9HA64	Ketosamine-3-kinase	FN3KRP	34 kDa	3	837029	1559858	1085719	694720	1318746	608576	0.752897	0.404883
888	P37108	Signal recognition particle 14 kDa protein	SRP14	15 kDa	2	485132	785682	564576	1103923	651222	991323	1.4964	0.146991
889	Q9NUJ1	Mycophenolic acid acyl-glucuronide esterase, mitochondrial	ABHD10	34 kDa	1	96162.8	130394	129464	109984	166453	109967	1.08534	0.673308
890	Q8IYB8	ATP-dependent RNA helicase SUPV3L1, mitochondrial	SUPV3L1	88 kDa	5	1060361	754815	849717	854919	783735	1080898	1.02051	0.893018
891	Q9Y520	Protein PRRC2C	PRRC2C	317 kDa	2	169621	265070	219235	242463	308095	274892	1.2623	0.171644
892	O43818	U3 small nucleolar RNA-interacting protein 2	RRP9	52 kDa	1	195760	213103	287233	209307	170088	161386	0.776877	0.200024
893	Q15019	Septin-2	SEPTIN2	41 kDa	2	142098	75666.4	179830	232554	260998	378364	2.19297	0.0500737
894	Q96GX9	Methylthioribulose-1-phosphate dehydratase	APIP	27 kDa	2	526348	485503	892765	670034	435744	606974	0.899264	0.692601
895	Q9BQL6	Fermitin family homolog 1	FERMT1	77 kDa	2	67308.2	122943	105598	54763.7	56027.8	51616.3	0.548955	0.112795
896	P32004	Neural cell adhesion molecule L1	L1CAM	140 kDa	4	2909016	2793569	2002224	2145336	1930545	2315923	0.829586	0.261135
897	Q9NZ08	Endoplasmic reticulum aminopeptidase 1	ERAP1	107 kDa	4	1346137	884791	872808	1087266	447569	310427	0.594529	0.227003
898	P21941	Cartilage matrix protein	MATN1	54 kDa	2	616434	622861	678525	608697	763468	660066	1.05966	0.50305
899	P06132	Uroporphyrinogen decarboxylase	UROD	41 kDa	4	1156383	1420234	1700548	1488118	2145227	1515393	1.20377	0.34127
900	Q15287	RNA-binding protein with serine-rich domain 1	RNPS1	34 kDa	2	113058	53401.2	236100	274598	179466	274918	1.81087	0.172973
901	P22102	Trifunctional purine biosynthetic protein adenosine-3	GART	108 kDa	6	3136272	3617807	3091146	3703343	3771733	3475910	1.11231	0.147578
902	P50552	Vasodilator-stimulated phosphoprotein	VASP	40 kDa	7	65229.9	40494	219023	177938	271056	96589.7	1.68003	0.383753
903	Q86W42	THO complex subunit 6 homolog	THOC6	38 kDa	4	343984	239427	431312	466662	372555	388726	1.21013	0.338316
904	Q9UHD9	Ubiquilin-2	UBQLN2	66 kDa	6	500808	661618	814521	506757	805550	1308809	1.32584	0.464105
905	Q5R3I4	Tetratricopeptide repeat protein 38	TTC38	53 kDa	1	263275	130144	229686	233963	181629	189370	0.970882	0.898552
906	Q4G0N4	NAD kinase 2, mitochondrial	NADK2	49 kDa	2	482972	224330	322271	564358	736383	412103	1.66365	0.134371
907	P80217	Interferon-induced 35 kDa protein	IFI35	32 kDa	4	1345859	1219650	1235243	1288788	1201856	1335165	1.00659	0.888103
908	Q9UN86	Ras GTPase-activating protein-binding protein 2	G3BP2	54 kDa	3	534286	668337	422831	866604	829120	839043	1.55942	0.047609
909	P55265	Double-stranded RNA-specific adenosine deaminase	ADAR	136 kDa	2	308575	166756	211150	204840	357877	186598	1.09153	0.776231
910	O15498	Synaptobrevin homolog YKT6	YKT6	22 kDa	3	980318	666639	570404	566439	509177	678607	0.791131	0.341348
911	Q96GK7	Fumarylacetoacetate hydrolase domain-containing protein 2A	FAHD2A	35 kDa	3	701486	1781658	1353081	864473	1178650	1655210	0.964055	0.912167
912	O75937	DnaJ homolog subfamily C member 8	DNAJC8	30 kDa	1	328180	674436	725600	386188	891542	469175	1.01081	0.976732
913	P11021	Endoplasmic reticulum chaperone BiP	HSPA5	72 kDa	17	971925	1612471	1825553	1580166	1959973	1844656	1.22106	0.336965
914	Q13769	THO complex subunit 5 homolog	THOC5	79 kDa	2	136890	113253	64072.8	54775.8	272616	225690	1.7602	0.353166
915	Q2TAY7	WD40 repeat-containing protein SMU1	SMU1	58 kDa	5	1968578	1635529	1984721	1130113	1334453	1578342	0.723391	0.041262
916	Q15758	Neutral amino acid transporter B(0)	SLC1A5	57 kDa	5	1055057	935993	1421730	1540869	917099	1172459	1.06377	0.771434
917	Q9BSH5	Haloacid dehalogenase-like hydrolase domain-containing protein 3	HDHD3	28 kDa	1	Missing Value	Missing Value	Missing Value	Missing Value	Missing Value	Missing Value	-	-
918	Q13287	N-myc-interactor	NMI	35 kDa	4	629282	659480	1120255	1430700	908414	945044	1.36328	0.276264
919	P02452	Collagen alpha-1(I) chain	COL1A1	139 kDa	7	227815	411823	225149	209860	318772	218614	0.86408	0.617592
920	O75717	WD repeat and HMG-box DNA-binding protein 1	WDHD1	126 kDa	1	138664	111136	155196	215329	139516	178848	1.31778	0.183009
921	Q99426	Tubulin-folding cofactor B	TBCB	27 kDa	1	43679.3	57822.6	73980.7	57754.9	91557.6	49186.7	1.13116	0.652329
922	Q96B26	Exosome complex component RRP43	EXOSC8	30 kDa	2	4342713	9707529	7961454	5686395	2808081	4161376	0.57496	0.178111
923	Q9UNN5	FAS-associated factor 1	FAF1	74 kDa	4	1262038	1633919	1600681	1431651	1293922	1807380	1.00808	0.953432
924	Q99714	3-hydroxyacyl-CoA dehydrogenase type-2	HSD17B10	27 kDa	3	300044	421543	276623	319929	250463	284692	0.856616	0.409039
925	Q9H3T3	Semaphorin-6B	SEMA6B	95 kDa	1	346177	342792	281230	385398	301185	274343	0.990442	0.942122
926	Q14CX7	N-alpha-acetyltransferase 25, NatB auxiliary subunit	NAA25	112 kDa	5	956276	827754	1084169	772296	1220555	942650	1.02347	0.890248
927	Q4G0J3	La-related protein 7	LARP7	67 kDa	2	441362	317203	600602	586737	346052	308629	0.913367	0.759425
928	Q9NPB8	Glycerophosphocholine phosphodiesterase GPCPD1	GPCPD1	76 kDa	1	Missing Value	Missing Value	Missing Value	Missing Value	Missing Value	Missing Value	-	-
929	Q14C86	GTPase-activating protein and VPS9 domain-containing protein 1	GAPVD1	165 kDa	4	871547	818011	1158149	987406	708562	941995	0.926346	0.636317
930	P42167	Lamina-associated polypeptide 2, isoforms beta/gamma	TMPO	51 kDa	3	133363	289480	338463	309916	329103	306473	1.24194	0.425655
931	P12110	Collagen alpha-2(VI) chain	COL6A2	109 kDa	4	214852	131219	54563.2	363017	235108	371682	2.42068	0.0414235
932	Q05519	Serine/arginine-rich splicing factor 11	SRSF11	54 kDa	1	163306	264358	166768	270746	311737	269417	1.43313	0.107003
933	O95336	6-phosphogluconolactonase	PGLS	28 kDa	6	1581689	1060941	1847512	1514016	1757448	1940784	1.16082	0.424812
934	Q7Z4Q2	HEAT repeat-containing protein 3	HEATR3	75 kDa	2	136916	68640.4	72560.6	127398	104599	69870.9	1.0854	0.790521
935	P50452	Serpin B8	SERPINB8	43 kDa	3	207499	151602	196202	379960	239382	236259	1.54078	0.158687
936	P04278	Sex hormone-binding globulin	SHBG	44 kDa	2	6043568	6712676	6504391	9313816	4657397	6394915	1.0574	0.812619
937	Q9GZP4	PITH domain-containing protein 1	PITHD1	24 kDa	4	350241	181119	460992	364112	448159	234931	1.05527	0.867436
938	P22732	Solute carrier family 2, facilitated glucose transporter member 5	SLC2A5	55 kDa	1	500423	576779	784978	376544	552979	423352	0.726501	0.178964
939	P42785	Lysosomal Pro-X carboxypeptidase	PRCP	56 kDa	1	344333	351604	292198	295287	274733	287438	0.867753	0.135128
940	Q14315	Filamin-C	FLNC	291 kDa	10	23757730	21218700	22116870	19687800	21827360	17637990	0.881655	0.150147
941	O43615	Mitochondrial import inner membrane translocase subunit TIM44	TIMM44	51 kDa	2	117277	67748.3	98080.8	87750.3	79438.2	80863.8	0.876181	0.504268
942	Q99614	Tetratricopeptide repeat protein 1	TTC1	34 kDa	3	410446	798962	1636848	657065	2062774	954924	1.29109	0.648539
943	P22692	Insulin-like growth factor-binding protein 4	IGFBP4	28 kDa	8	18302.2	24322.9	1309.51	60811.8	47745.7	61490.3	3.87047	0.0103189
944	Q8TCD5	5'(3')-deoxyribonucleotidase, cytosolic type	NT5C	23 kDa	4	1484900	1585707	2073982	1408131	1196261	1587604	0.814836	0.225701
945	Q6ZNJ1	Neurobeachin-like protein 2	NBEAL2	303 kDa	2	225543	177179	253039	244971	123579	145910	0.784525	0.351502
946	P02654	Apolipoprotein C-I	APOC1	9 kDa	1	Missing Value	Missing Value	Missing Value	Missing Value	Missing Value	Missing Value	-	-
947	Q14258	E3 ubiquitin/ISG15 ligase TRIM25	TRIM25	71 kDa	2	188140	134837	158937	193333	206857	210060	1.26631	0.0969695
948	P07741	Adenine phosphoribosyltransferase	APRT	20 kDa	3	1031934	1323782	1317803	1369623	1763276	1187044	1.17597	0.346894
949	O15541	E3 ubiquitin-protein ligase RNF113A	RNF113A	39 kDa	2	Missing Value	36216.8	54112.8	67277.9	15587.2	59179.6	1.57251	0.488206
950	Q07157	Tight junction protein ZO-1	TJP1	195 kDa	5	412387	451410	701300	413723	528155	430534	0.876886	0.56272
951	Q9BXK5	Bcl-2-like protein 13	BCL2L13	53 kDa	1	242114	214459	310606	238794	287728	246807	1.00802	0.953408
952	P80303	Nucleobindin-2	NUCB2	50 kDa	2	133726	124310	101602	78767.1	68080.2	66234.2	0.592489	0.0233489
953	O95757	Heat shock 70 kDa protein 4L	HSPA4L	95 kDa	4	1104934	1166453	1651797	1155454	1217515	1267067	0.927827	0.642229
954	Q16787	Laminin subunit alpha-3	LAMA3	367 kDa	4	396675	46553.7	346539	368856	206496	447981	1.29574	0.587543
955	Q96FV2	Secernin-2	SCRN2	47 kDa	2	522880	350632	420563	493991	372824	543500	1.08983	0.615303
956	Q8IUI8	Cytokine receptor-like factor 3	CRLF3	50 kDa	2	110676	194944	291939	167304	163233	126380	0.76464	0.467777
957	Q7Z406	Myosin-14	MYH14	228 kDa	5	316836	302610	324277	257851	349690	221094	0.878049	0.421968
958	P07686	Beta-hexosaminidase subunit beta	HEXB	63 kDa	5	775068	592339	472050	501520	647851	681366	0.99526	0.979276
959	P24592	Insulin-like growth factor-binding protein 6	IGFBP6	25 kDa	1	145692	299461	314868	627155	307415	1130318	2.71688	0.206763
960	P36969	Phospholipid hydroperoxide glutathione peroxidase	GPX4	22 kDa	1	Missing Value	Missing Value	Missing Value	Missing Value	Missing Value	Missing Value	-	-
961	P08133	Annexin A6	ANXA6	76 kDa	2	36063.9	90512.4	100798	66539.1	119703	59732.7	1.08181	0.83341
962	Q9NPH2	Inositol-3-phosphate synthase 1	ISYNA1	61 kDa	4	1330344	1727887	1910854	1371582	1066838	1383125	0.769064	0.143919
963	Q5T1C6	Acyl-coenzyme A thioesterase THEM4	THEM4	27 kDa	1	Missing Value	Missing Value	15230.1	Missing Value	80267	9494.77	-	-
964	Q9Y5Z9	UbiA prenyltransferase domain-containing protein 1	UBIAD1	37 kDa	1	664294	914045	881187	1997124	2264376	1164158	2.20598	0.0892013
965	Q9P2E9	Ribosome-binding protein 1	RRBP1	152 kDa	2	96065.7	72857.2	78714.4	43496.4	53230.9	162682	1.04754	0.928232
966	P10643	Complement component C7	C7	94 kDa	3	1532741	17083.1	12447570	40576.1	6018828	153128	0.443835	0.596212
967	Q99575	Ribonucleases P/MRP protein subunit POP1	POP1	115 kDa	1	30444.1	84705.4	125635	84327.1	114355	130550	1.36734	0.409856
968	Q96HS1	Serine/threonine-protein phosphatase PGAM5, mitochondrial	PGAM5	32 kDa	1	153688	167272	179761	130842	108939	135902	0.750283	0.0206951
969	P53602	Diphosphomevalonate decarboxylase	MVD	43 kDa	1	183528	312082	506739	139288	104374	169921	0.412614	0.167511
970	O14964	Hepatocyte growth factor-regulated tyrosine kinase substrate	HGS	86 kDa	2	Missing Value	Missing Value	Missing Value	Missing Value	Missing Value	Missing Value	-	-
971	P10619	Lysosomal protective protein	CTSA	54 kDa	1	194498	221057	138000	155742	153985	48550.4	0.64723	0.213949
972	Q13561	Dynactin subunit 2	DCTN2	44 kDa	3	215976	318396	188472	151594	199994	282187	0.876779	0.617476
973	P54886	Delta-1-pyrroline-5-carboxylate synthase	ALDH18A1	87 kDa	4	249097	462080	386970	435303	350416	452068	1.12716	0.553506
974	P09417	Dihydropteridine reductase	QDPR	26 kDa	2	709831	568148	930473	912081	1250353	692844	1.29289	0.336824
975	P16930	Fumarylacetoacetase	FAH	46 kDa	5	75310.1	96856.6	185043	267270	174383	129716	1.59953	0.248645
976	P12429	Annexin A3	ANXA3	36 kDa	2	66782.3	22050.1	242595	29151.3	12543.5	86038.6	0.385404	0.423441
977	Q9UPQ0	LIM and calponin homology domains-containing protein 1	LIMCH1	122 kDa	2	187710	178071	162534	257175	107400	271986	1.20489	0.564452
978	Q08629	Testican-1	SPOCK1	49 kDa	2	592331	650446	319904	539276	443096	602494	1.0142	0.95176
979	Q9NZB2	Constitutive coactivator of PPAR-gamma-like protein 1	FAM120A	122 kDa	1	54879.7	69760.9	94517.8	135248	85585	117170	1.54228	0.103069
980	Q96PZ0	Pseudouridylate synthase 7 homolog	PUS7	75 kDa	3	424517	302632	451743	533457	325528	447607	1.10832	0.606267
981	O75165	DnaJ homolog subfamily C member 13	DNAJC13	254 kDa	2	44269.6	109115	93572.4	40673.3	19786.2	48571.3	0.441496	0.128675
982	O43237	Cytoplasmic dynein 1 light intermediate chain 2	DYNC1LI2	54 kDa	3	858420	539758	602734	492976	531917	465704	0.744959	0.219801
983	O00567	Nucleolar protein 56	NOP56	66 kDa	3	843399	748872	880292	808099	900616	670132	0.962098	0.712366
984	O43493	Trans-Golgi network integral membrane protein 2	TGOLN2	46 kDa	1	34522.1	Missing Value	Missing Value	11327.1	46661.7	13229.6	-	-
985	Q8TF05	Serine/threonine-protein phosphatase 4 regulatory subunit 1	PPP4R1	107 kDa	1	14694.4	Missing Value	44200.3	13223.5	104882	24182.2	-	-
986	Q14203	Dynactin subunit 1	DCTN1	142 kDa	5	58605.5	23624.4	62060.6	Missing Value	20100.1	12106.8	-	-
987	P13667	Protein disulfide-isomerase A4	PDIA4	73 kDa	6	961445	2220656	1365044	1818701	2309020	1662661	1.27341	0.395246
988	Q9Y5X3	Sorting nexin-5	SNX5	47 kDa	4	304507	379902	292655	344076	312740	307569	0.987022	0.896533
989	Q9UI42	Carboxypeptidase A4	CPA4	47 kDa	2	1254908	1217374	963620	1125070	939895	1177860	0.943806	0.611605
990	Q9H9A6	Leucine-rich repeat-containing protein 40	LRRC40	68 kDa	3	871111	477530	379524	383565	375596	279019	0.600741	0.262797
991	Q9NXH9	tRNA (guanine(26)-N(2))-dimethyltransferase	TRMT1	72 kDa	6	486466	470544	632205	374164	434760	598902	0.885862	0.516671
992	P22059	Oxysterol-binding protein 1	OSBP	89 kDa	3	287109	223038	212954	172269	217262	202130	0.818226	0.194621
993	P19022	Cadherin-2	CDH2	100 kDa	5	68673.3	92104.4	Missing Value	55591.6	118830	57074.6	-	-
994	P18583	Protein SON	SON	264 kDa	1	46694	32388.3	138706	120462	45402.3	142742	1.417	0.533837
995	Q9H4M9	EH domain-containing protein 1	EHD1	61 kDa	9	2222510	1129214	1544364	839884	496082	808072	0.437908	0.0897261
996	P21399	Cytoplasmic aconitate hydratase	ACO1	98 kDa	9	810135	673328	662722	906914	584693	745121	1.04219	0.79154
997	Q8N4H0	Spermatogenesis associated 6-like protein	SPATA6L	45 kDa	1	Missing Value	Missing Value	Missing Value	Missing Value	Missing Value	Missing Value	-	-
998	Q99996	A-kinase anchor protein 9	AKAP9	453 kDa	1	64166.8	113356	68328.6	8584.34	103358	25693.4	0.559831	0.354273
999	P04066	Tissue alpha-L-fucosidase	FUCA1	54 kDa	2	317316	334172	210037	178184	183628	89394.2	0.523729	0.0536769
1000	Q13421	Mesothelin	MSLN	69 kDa	3	295174	69077.2	205168	82751.9	236532	204649	0.920118	0.861056
1001	P09467	Fructose-1,6-bisphosphatase 1	FBP1	37 kDa	2	4291898	3474243	3665025	3444117	3104192	3075627	0.841903	0.119173
1002	P04114	Apolipoprotein B-100	APOB	516 kDa	11	152881100	147255900	134290100	124514700	157323800	114763500	0.912931	0.440635
1003	Q9NXV6	CDKN2A-interacting protein	CDKN2AIP	61 kDa	4	786520	576716	515087	691603	515362	387427	0.848838	0.476384
1004	P30405	Peptidyl-prolyl cis-trans isomerase F, mitochondrial	PPIF	22 kDa	1	Missing Value	Missing Value	Missing Value	Missing Value	Missing Value	Missing Value	-	-
1005	P32321	Deoxycytidylate deaminase	DCTD	20 kDa	1	79970.6	61171.7	115507	86903.6	88568.4	67654.1	0.94731	0.812963
1006	P05787	Keratin, type II cytoskeletal 8	KRT8	54 kDa	8	1151948	1391957	2085973	1974495	1113853	1864771	1.06982	0.795696
1007	Q8IUL8	Cartilage intermediate layer protein 2	CILP2	126 kDa	8	469596	524986	588531	436015	377678	562666	0.8694	0.355885
1008	Q15102	Platelet-activating factor acetylhydrolase IB subunit gamma	PAFAH1B3	26 kDa	2	231778	268277	293715	517890	174838	291325	1.23972	0.595161
1009	O95707	Ribonuclease P protein subunit p29	POP4	25 kDa	1	Missing Value	Missing Value	Missing Value	Missing Value	Missing Value	Missing Value	-	-
1010	Q9BZE4	Nucleolar GTP-binding protein 1	GTPBP4	74 kDa	2	251215	220643	241991	251706	208982	192019	0.914348	0.382389
1011	Q9Y5X1	Sorting nexin-9	SNX9	67 kDa	3	1318300	1212903	862730	909393	918857	854547	0.790468	0.225485
1012	Q9BSJ8	Extended synaptotagmin-1	ESYT1	123 kDa	2	208399	306081	238386	241819	132333	233348	0.806916	0.349132
1013	O94985	Calsyntenin-1	CLSTN1	110 kDa	6	167698	70242.7	138313	4165.21	39271.4	29886.1	0.194876	0.059208
1014	A5A3E0	POTE ankyrin domain family member F	POTEF	121 kDa	6	694978	23216180	10654040	8184084	8258771	6385541	0.660445	0.609725
1015	Q5M775	Cytospin-B	SPECC1	119 kDa	1	150822	209572	361499	322174	658727	428553	1.95244	0.135838
1016	Q9UKX7	Nuclear pore complex protein Nup50	NUP50	50 kDa	3	788452	751959	1055432	896837	909198	1183525	1.15167	0.382262
1017	P78318	Immunoglobulin-binding protein 1	IGBP1	39 kDa	1	53301.5	26838	54853.3	7245.98	12958.1	14980.7	0.260642	0.0593976
1018	Q01970	1-phosphatidylinositol 4,5-bisphosphate phosphodiesterase beta-3	PLCB3	139 kDa	3	482032	602929	975335	654086	733478	693753	1.0102	0.966861
1019	P47929	Galectin-7	LGALS7	15 kDa	1	31761.1	4470958	69473.5	23455620	103655	76945.6	5.16956	0.501944
1020	Q96C36	Pyrroline-5-carboxylate reductase 2	PYCR2	34 kDa	4	222527	59471	65612.1	32208.6	56734.9	132322	0.636535	0.53899
1021	Q14118	Dystroglycan	DAG1	97 kDa	5	820548	966884	539290	569719	452715	1074347	0.901174	0.756428
1022	P08397	Porphobilinogen deaminase	HMBS	39 kDa	2	8269.26	4363.94	13573.8	103314	49495.1	104816	9.83042	0.0486921
1023	Q96IU4	Protein ABHD14B	ABHD14B	22 kDa	4	624714	646622	585017	202580	409030	971767	0.852951	0.73079
1024	Q8WWI1	LIM domain only protein 7	LMO7	193 kDa	2	128701	176694	180489	125172	95399.6	100490	0.660776	0.0604215
1025	Q9NY12	H/ACA ribonucleoprotein complex subunit 1	GAR1	22 kDa	1	456449	582528	683800	483459	530712	583466	0.927362	0.605628
1026	Q6UW88	Epigen	EPGN	17 kDa	2	272462	442422	192768	308932	496615	392102	1.3195	0.355037
1027	P49354	Protein farnesyltransferase/geranylgeranyltransferase type-1 subunit alpha	FNTA	44 kDa	3	53426.5	151187	241154	165347	191957	200517	1.25137	0.564251
1028	Q06033	Inter-alpha-trypsin inhibitor heavy chain H3	ITIH3	100 kDa	4	81473.2	109609	89796.3	120783	34879.1	59407.7	0.765706	0.486884
1029	Q9BYT8	Neurolysin, mitochondrial	NLN	81 kDa	4	466695	420013	399258	534164	708695	285730	1.18867	0.57918
1030	Q86X76	Deaminated glutathione amidase	NIT1	36 kDa	4	570503	402034	811117	866082	1347807	471772	1.50571	0.365244
1031	Q53RD9	Fibulin-7	FBLN7	47 kDa	2	78088.4	104892	141583	77645.5	160272	117650	1.09553	0.749916
1032	Q9NQC3	Reticulon-4	RTN4	130 kDa	1	325255	550484	481417	472214	576670	521652	1.15723	0.407415
1033	Q09161	Nuclear cap-binding protein subunit 1	NCBP1	92 kDa	3	Missing Value	Missing Value	Missing Value	Missing Value	Missing Value	Missing Value	-	-
1034	P11310	Medium-chain specific acyl-CoA dehydrogenase, mitochondrial	ACADM	47 kDa	2	323550	303208	299967	322849	311570	345981	1.05792	0.232909
1035	P19525	Interferon-induced, double-stranded RNA-activated protein kinase	EIF2AK2	62 kDa	1	107139	94568.2	98583.1	53705.8	67692.6	98859	0.733481	0.176738
1036	Q9H6T3	RNA polymerase II-associated protein 3	RPAP3	76 kDa	1	35787.6	170955	101889	83999.1	69823.4	37523.8	0.619982	0.427119
1037	Q9BVS5	tRNA (adenine(58)-N(1))-methyltransferase, mitochondrial	TRMT61B	53 kDa	1	713884	541844	1179053	946831	966972	738581	1.08937	0.749066
1038	Q8IZ73	RNA pseudouridylate synthase domain-containing protein 2	RPUSD2	61 kDa	2	174146	146753	202692	200006	242562	192388	1.21269	0.173813
1039	Q05682	Caldesmon	CALD1	93 kDa	5	22087.2	115124	304984	428296	104618	195543	1.64737	0.496186
1040	Q9ULV4	Coronin-1C	CORO1C	53 kDa	4	1845555	1567423	1724999	1217683	1254497	1232868	0.72111	0.0255655
1041	Q9Y547	Intraflagellar transport protein 25 homolog	HSPB11	16 kDa	2	773861	549112	239056	333293	203062	336398	0.558731	0.273679
1042	Q92667	A-kinase anchor protein 1, mitochondrial	AKAP1	97 kDa	1	Missing Value	Missing Value	Missing Value	Missing Value	Missing Value	Missing Value	-	-
1043	O60256	Phosphoribosyl pyrophosphate synthase-associated protein 2	PRPSAP2	41 kDa	2	851987	909521	1115673	358563	629340	772302	0.611781	0.0720195
1044	Q10469	Alpha-1,6-mannosyl-glycoprotein 2-beta-N-acetylglucosaminyltransferase	MGAT2	52 kDa	2	7336.88	15810.4	17882.4	105235	22841.5	73531.8	4.91372	0.153158
1045	O15232	Matrilin-3	MATN3	53 kDa	4	9359.65	56155.5	20627.5	55822	48421.4	86567.8	2.21506	0.131878
1046	Q9C0D6	FH2 domain-containing protein 1	FHDC1	125 kDa	1	251197	368414	214119	147526	225471	94925.8	0.56124	0.114771
1047	P42696	RNA-binding protein 34	RBM34	49 kDa	1	21337.8	113266	79884.1	23272.5	20400.3	10192.1	0.251132	0.182094
1048	Q9H0A9	Speriolin-like protein	SPATC1L	38 kDa	1	2052211	2673186	2841524	2710475	2840211	2532156	1.06818	0.55777
1049	P36955	Pigment epithelium-derived factor	SERPINF1	46 kDa	3	286941	332712	149615	173366	220668	141781	0.696526	0.292629
1050	Q96TC7	Regulator of microtubule dynamics protein 3	RMDN3	52 kDa	1	138007	332508	314149	385029	416037	229860	1.31384	0.387229
1051	O15264	Mitogen-activated protein kinase 13	MAPK13	42 kDa	1	324128	489726	278419	179086	270248	406918	0.783917	0.441684
1052	A0MZ66	Shootin-1	SHTN1	72 kDa	2	420230	908656	493944	421241	538214	666436	0.89196	0.723075
1053	P49593	Protein phosphatase 1F	PPM1F	50 kDa	1	120812	118725	187152	206856	249274	255895	1.66872	0.0305558
1054	Q99590	Protein SCAF11	SCAF11	165 kDa	1	26929.1	40275.1	10571.1	36382.4	58564.8	18901.3	1.46381	0.452266
1055	O95400	CD2 antigen cytoplasmic tail-binding protein 2	CD2BP2	38 kDa	1	177263	163217	88196.7	100146	149954	105230	0.828898	0.495691
1056	Q14CN4	Keratin, type II cytoskeletal 72	KRT72	56 kDa	3	11441.9	35117.5	16980.2	121595	Missing Value	7466.26	-	-
1057	P08962	CD63 antigen	CD63	26 kDa	1	40869.3	60601.7	80034.8	54956.2	68621.3	186764	1.70982	0.414665
1058	Q8NEV8	Exophilin-5	EXPH5	223 kDa	1	Missing Value	Missing Value	Missing Value	Missing Value	Missing Value	Missing Value	-	-
1059	P16070	CD44 antigen	CD44	82 kDa	3	522443	834162	507400	528566	972489	642155	1.14979	0.615498
1060	Q9NVX2	Notchless protein homolog 1	NLE1	53 kDa	3	158384	114892	236474	83194	115858	257740	0.89611	0.799218
1061	P06681	Complement C2	C2	83 kDa	4	Missing Value	Missing Value	Missing Value	Missing Value	Missing Value	Missing Value	-	-
1062	O75312	Zinc finger protein ZPR1	ZPR1	51 kDa	2	161324	146284	188061	144448	187973	130447	0.933826	0.636038
1063	P13796	Plastin-2	LCP1	70 kDa	16	1875183	2002180	2329171	2061681	2972649	2176686	1.16184	0.371735
1064	O75439	Mitochondrial-processing peptidase subunit beta	PMPCB	54 kDa	1	102509	68153.6	84787.5	37023.8	55778.5	53253.2	0.571758	0.0454706
1065	O00533	Neural cell adhesion molecule L1-like protein	CHL1	135 kDa	3	13745.7	38820.1	Missing Value	11403.6	21979	74694.3	-	-
1066	O15479	Melanoma-associated antigen B2	MAGEB2	35 kDa	1	133156	231535	236707	237052	226477	259527	1.20229	0.352191
1067	Q9P2B2	Prostaglandin F2 receptor negative regulator	PTGFRN	99 kDa	1	235180	109936	60881.2	529884	31763.2	243187	1.98237	0.460999
1068	Q9BUD6	Spondin-2	SPON2	36 kDa	1	Missing Value	Missing Value	Missing Value	Missing Value	Missing Value	Missing Value	-	-
1069	Q0JRZ9	F-BAR domain only protein 2	FCHO2	89 kDa	1	77819	52336.1	31615.8	74717.4	45650.5	45104.4	1.02288	0.94449
1070	Q6PI48	Aspartate--tRNA ligase, mitochondrial	DARS2	74 kDa	1	Missing Value	Missing Value	Missing Value	Missing Value	Missing Value	Missing Value	-	-
1071	Q9UNN8	Endothelial protein C receptor	PROCR	27 kDa	1	Missing Value	Missing Value	Missing Value	Missing Value	Missing Value	Missing Value	-	-
1072	Q96QR8	Transcriptional activator protein Pur-beta	PURB	33 kDa	1	Missing Value	49247.4	91186	82007.6	Missing Value	24495.3	-	-
1073	P09972	Fructose-bisphosphate aldolase C	ALDOC	39 kDa	10	464805	450970	493077	603036	496903	501486	1.13669	0.197203
1074	Q9Y3T9	Nucleolar complex protein 2 homolog	NOC2L	85 kDa	2	118275	68499.8	258187	167949	310822	223226	1.57766	0.296001
1075	Q9HCY8	Protein S100-A14	S100A14	12 kDa	2	317933	276794	236507	446566	216387	601403	1.52106	0.324968
1076	P09603	Macrophage colony-stimulating factor 1	CSF1	60 kDa	1	Missing Value	Missing Value	Missing Value	Missing Value	Missing Value	Missing Value	-	-
1077	Q4VC31	Coiled-coil domain-containing protein 58	CCDC58	17 kDa	3	539174	674867	791198	996049	1359780	772898	1.56028	0.147378
1078	O60678	Protein arginine N-methyltransferase 3	PRMT3	60 kDa	3	311791	659764	840410	522893	902221	422310	1.01957	0.958439
1079	Q6NSI3	Protein FAM53A	FAM53A	43 kDa	1	1058146	897617	898672	799662	680664	792735	0.796326	0.0473985
1080	O15382	Branched-chain-amino-acid aminotransferase, mitochondrial	BCAT2	44 kDa	2	255050	453973	487392	298320	450093	158782	0.758261	0.435349
1081	P23490	Loricrin	LORICRIN	26 kDa	1	86645.6	195762	222770	198977	152751	74854	0.844421	0.660064
1082	Q9Y6M5	Zinc transporter 1	SLC30A1	55 kDa	2	152566	329363	406818	422344	323301	392072	1.28014	0.390216
1083	P10646	Tissue factor pathway inhibitor	TFPI	35 kDa	2	187173	247732	273221	350447	371929	302996	1.44801	0.0339786
1084	P02042	Hemoglobin subunit delta	HBD	16 kDa	5	584871	923779	1271547	1101417	1471163	1133070	1.33287	0.266983
1085	Q12805	EGF-containing fibulin-like extracellular matrix protein 1	EFEMP1	55 kDa	7	17421.9	52693.5	34772.2	8061.39	22873.1	14328.3	0.431536	0.180443
1086	Q8WW59	SPRY domain-containing protein 4	SPRYD4	23 kDa	3	196006	423566	434922	337536	717065	303605	1.28802	0.553976
1087	Q8N884	Cyclic GMP-AMP synthase	CGAS	59 kDa	1	9590528	11106020	8183590	10618190	12804830	8575924	1.10799	0.526757
1088	O95980	Reversion-inducing cysteine-rich protein with Kazal motifs	RECK	106 kDa	4	Missing Value	Missing Value	Missing Value	Missing Value	Missing Value	Missing Value	-	-
1089	Q96JP2	Unconventional myosin-XVB	MYO15B	167 kDa	1	53217350	78113900	97919790	74485580	84394080	93885820	1.10257	0.62047
1090	O95067	G2/mitotic-specific cyclin-B2	CCNB2	45 kDa	1	Missing Value	Missing Value	Missing Value	Missing Value	Missing Value	Missing Value	-	-
1091	Q6PCE3	Glucose 1,6-bisphosphate synthase	PGM2L1	70 kDa	3	665210	478387	601271	488847	549749	360108	0.801611	0.214572
1092	O75934	Pre-mRNA-splicing factor SPF27	BCAS2	26 kDa	2	111513	77948.3	390691	148678	309836	271022	1.25749	0.683424
1093	P15927	Replication protein A 32 kDa subunit	RPA2	29 kDa	2	415854	571830	499450	571154	614999	506786	1.13839	0.287342
1094	Q9UBK9	Protein UXT	UXT	18 kDa	1	Missing Value	Missing Value	Missing Value	Missing Value	Missing Value	Missing Value	-	-

## Sheet: Up-regulated proteins
Supplementary Table 5. List of up-regulated human proteins observed in TNF stimulated and non-stimulated HeLa cells by albumin non-depletion. The results of simultaneously analyzing collected MS data for each treatment by the Scaffold DIA were used.
No	Uniprot Ac.	Protein name	Gene symbol	Molecular Weight	Identified # of Peptides	TNF non-stimulated Sup. 1 Intensity	TNF non-stimulated Sup. 2 Intensity	TNF non-stimulated Sup. 3 Intensity	TNF stimulated Sup. 1 Intensity	TNF stimulated Sup. 2 Intensity	TNF stimulated Sup. 3 Intensity	Fold change by intensity Ave. (stimulated/non-stimulated)	P-value
1	P02774	Vitamin D-binding protein	GC	53 kDa	5	60907370	34787320	160211500	208724000	343236200	228790000	3.05092	0.0371508
2	P05231	Interleukin-6	IL6	24 kDa	3	2966835	2836901	3107459	6063474	6517910	6694901	2.16315	0.000852432
3	P53396	ATP-citrate synthase	ACLY	121 kDa	15	1248080	1520455	1919889	2373202	2587333	2282626	1.5449	0.0321683
4	P84077	ADP-ribosylation factor 1	ARF1	21 kDa	6	96613.9	209178	397486	816124	782963	594640	3.11929	0.0127064
5	Q14978	Nucleolar and coiled-body phosphoprotein 1	NOLC1	74 kDa	4	895688	932641	845549	1716536	1982175	1596898	1.9805	0.0132846
6	Q16836	Hydroxyacyl-coenzyme A dehydrogenase, mitochondrial	HADH	34 kDa	4	260590	870671	686572	1097178	1209722	1605613	2.1523	0.0437001
7	P33316	Deoxyuridine 5'-triphosphate nucleotidohydrolase, mitochondrial	DUT	27 kDa	5	2879662	3658483	4272241	6092476	6554071	5295739	1.65973	0.0122968
8	Q9HCK4	Roundabout homolog 2	ROBO2	151 kDa	6	1482245	1674724	1829205	2414789	2725725	2576088	1.5476	0.00261127
9	Q9UBG0	C-type mannose receptor 2	MRC2	167 kDa	13	289728	405850	368869	848259	814889	798011	2.31215	0.00176874
10	P31431	Syndecan-4	SDC4	22 kDa	2	551474	443059	396262	910578	953530	677211	1.82724	0.0281363
11	P10145	Interleukin-8	CXCL8	11 kDa	1	133368	85401.5	369046	685356	766803	435458	3.21124	0.0317082
12	P01876	Immunoglobulin heavy constant alpha 1	IGHA1	38 kDa	2	128632	137284	219465	496204	330965	555427	2.84848	0.0318353
13	Q99536	Synaptic vesicle membrane protein VAT-1 homolog	VAT1	42 kDa	4	40999.1	39812.7	19883.6	145072	84800.2	114557	3.42051	0.0298761
14	Q9P287	BRCA2 and CDKN1A-interacting protein	BCCIP	36 kDa	4	1182952	1083819	770629	1820303	1754100	2169011	1.8909	0.00729493
15	Q9NRV9	Heme-binding protein 1	HEBP1	21 kDa	4	269749	257450	344696	549673	452846	405454	1.61484	0.0311364
16	Q9UN86	Ras GTPase-activating protein-binding protein 2	G3BP2	54 kDa	3	534286	668337	422831	866604	829120	839043	1.55942	0.047609
17	P12110	Collagen alpha-2(VI) chain	COL6A2	109 kDa	4	214852	131219	54563.2	363017	235108	371682	2.42068	0.0414235
18	P22692	Insulin-like growth factor-binding protein 4	IGFBP4	28 kDa	8	18302.2	24322.9	1309.51	60811.8	47745.7	61490.3	3.87047	0.0103189
19	P08397	Porphobilinogen deaminase	HMBS	39 kDa	2	8269.26	4363.94	13573.8	103314	49495.1	104816	9.83042	0.0486921
20	P49593	Protein phosphatase 1F	PPM1F	50 kDa	1	120812	118725	187152	206856	249274	255895	1.66872	0.0305558

## Sheet: Down-regulated proteins
Supplementary Table 5. List of down-regulated human proteins observed in TNF stimulated and non-stimulated HeLa cells by albumin non-depletion. The results of simultaneously analyzing collected MS data for each treatment by the Scaffold DIA were used.
No	Uniprot Ac.	Protein name	Gene symbol	Molecular Weight	Identified # of Peptides	TNF non-stimulated Sup. 1 Intensity	TNF non-stimulated Sup. 2 Intensity	TNF non-stimulated Sup. 3 Intensity	TNF stimulated Sup. 1 Intensity	TNF stimulated Sup. 2 Intensity	TNF stimulated Sup. 3 Intensity	Fold change by intensity Ave. (stimulated/non-stimulated)	P-value
1	P13645	Keratin, type I cytoskeletal 10	KRT10	59 kDa	18	642572800	463793500	514020500	195344900	191424600	180290900	0.349954	0.0215831
2	P35908	Keratin, type II cytoskeletal 2 epidermal	KRT2	65 kDa	21	363237900	246110700	298076700	127630700	108315800	109950600	0.381185	0.0279436
3	P35443	Thrombospondin-4	THBS4	106 kDa	13	7197822	6354941	5142401	4571081	2816167	3341772	0.573893	0.0292359
4	Q9H853	Putative tubulin-like protein alpha-4B	TUBA4B	28 kDa	2	1198262	1247164	1028721	884106	592825	740613	0.638299	0.0191988
5	P02753	Retinol-binding protein 4	RBP4	23 kDa	3	110668600	64201290	74985470	23778740	33469090	22016250	0.31724	0.0484937
6	P80303	Nucleobindin-2	NUCB2	50 kDa	2	133726	124310	101602	78767.1	68080.2	66234.2	0.592489	0.0233489
7	O75439	Mitochondrial-processing peptidase subunit beta	PMPCB	54 kDa	1	102509	68153.6	84787.5	37023.8	55778.5	53253.2	0.571758	0.0454706
